# Supplementary material for: Design, synthesis and in silico studies of new quinazolinone derivatives as antitumor PARP-1 inhibitors
Source: PubMed Central journal article supplement — RSC Adv. 2020 Aug 10;10(49):29475–92. doi: 10.1039/d0ra05943a (PMC9055986; doi:10.1039/d0ra05943a), 2020-08-10
Supplement: RA-010-D0RA05943A-s002.pdf [file RA-010-D0RA05943A-s002.pdf]

## Design, Synthesis and *In Silico* Studies of New Quinazolinone Derivatives as Antitumor PARP-1 Inhibitors

Sayed K. Ramadan<sup>a</sup>, Eman Z. Elrazaz<sup>b</sup>, Khaled A. M. Abouzid<sup>b,c,\*</sup>, Abeer M. El-Naggar<sup>a,\*</sup>

<sup>a</sup> *Department of Chemistry, Faculty of Science, Ain Shams University, Abbassia, 11566 Cairo, Egypt*

<sup>b</sup> *Department of Pharmaceutical Chemistry, Faculty of Pharmacy, Ain Shams University, Abbassia, 11566 Cairo, Egypt*

<sup>c</sup> *Department of Organic and Medicinal Chemistry, Faculty of Pharmacy, University of Sadat City, Sadat City, Egypt*

### *Supporting information*

**\* Corresponding authors:**

**Khaled A. M. Abouzid**

Department of Pharmaceutical Chemistry, Faculty of Pharmacy, Ain Shams University, Abbassia, 11566 Cairo, Egypt

**Email:** [khaled.abouzid@pharma.asu.edu.eg](mailto:khaled.abouzid@pharma.asu.edu.eg)

**Abeer M. El-Naggar**

Chemistry Department, Faculty of Science, Ain Shams University, Abbassia, Cairo-11566, Egypt.

**E-mail:** [elsayedam@sci.asu.edu.eg](mailto:elsayedam@sci.asu.edu.eg)

*3-Phenyl-2-thioxo-2,3-dihydroquinazolin-4(1H)-one (3).*

IR

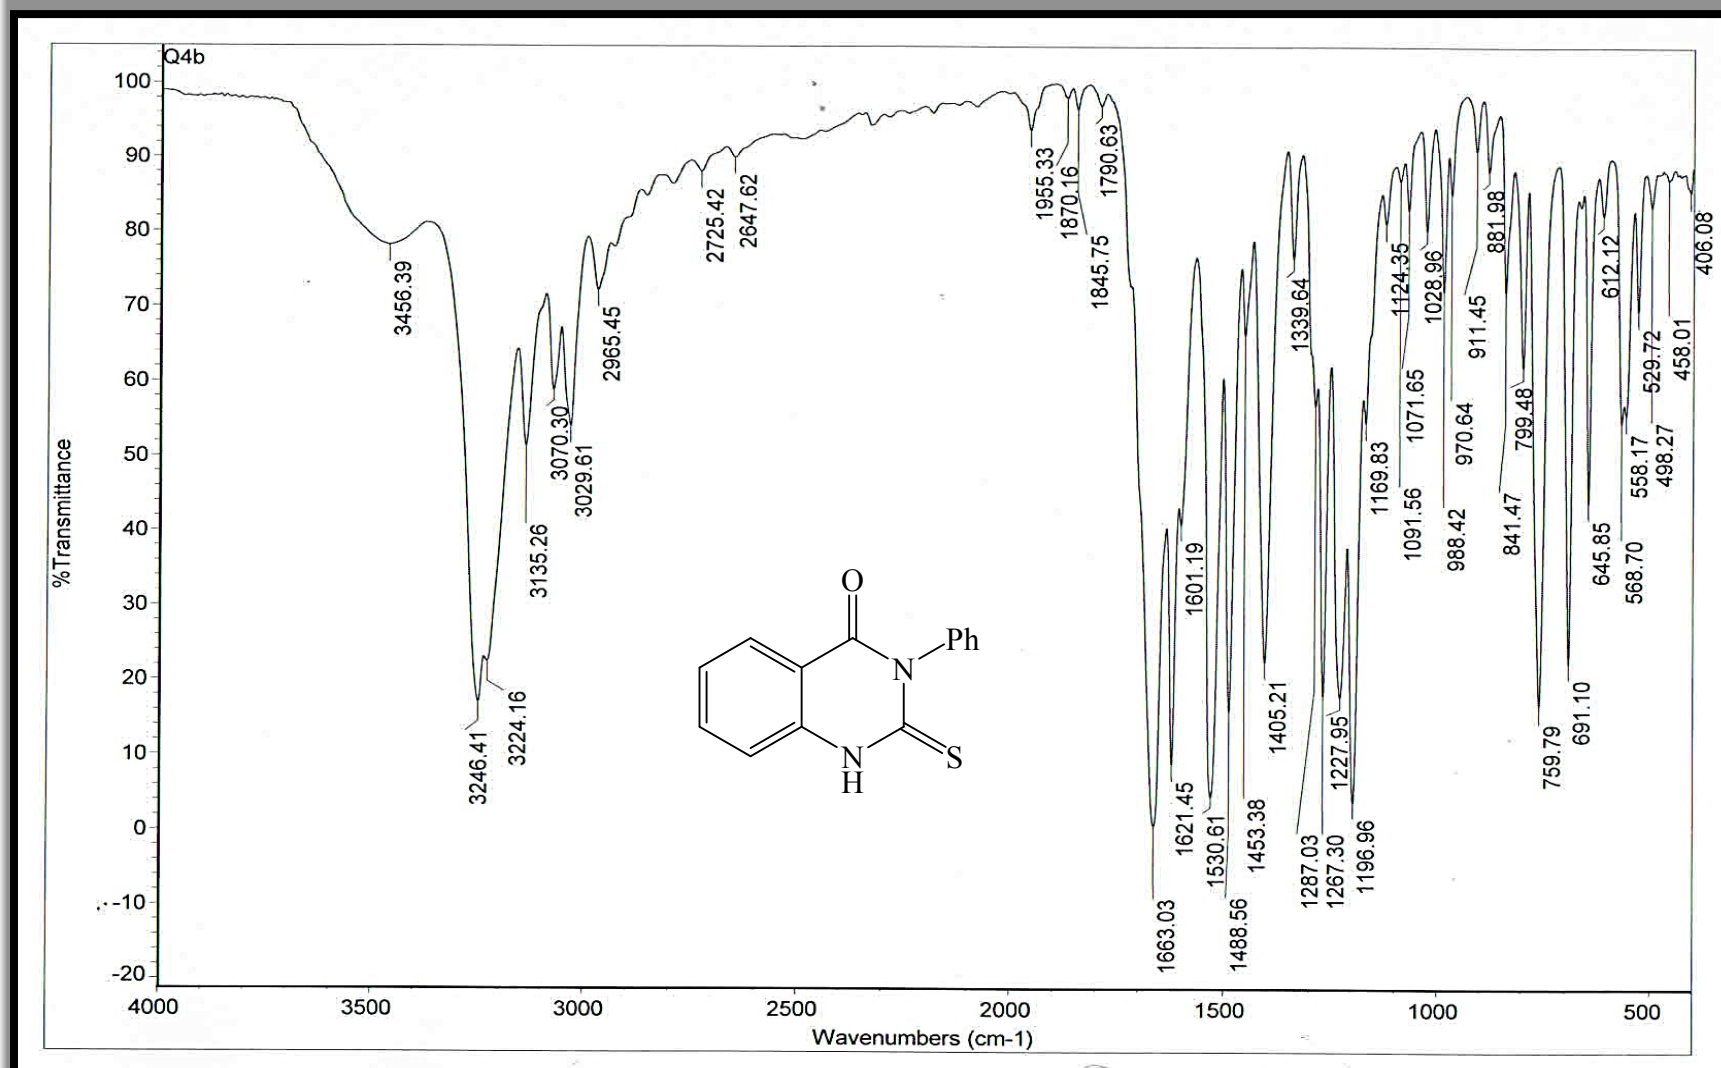

*HNMR*

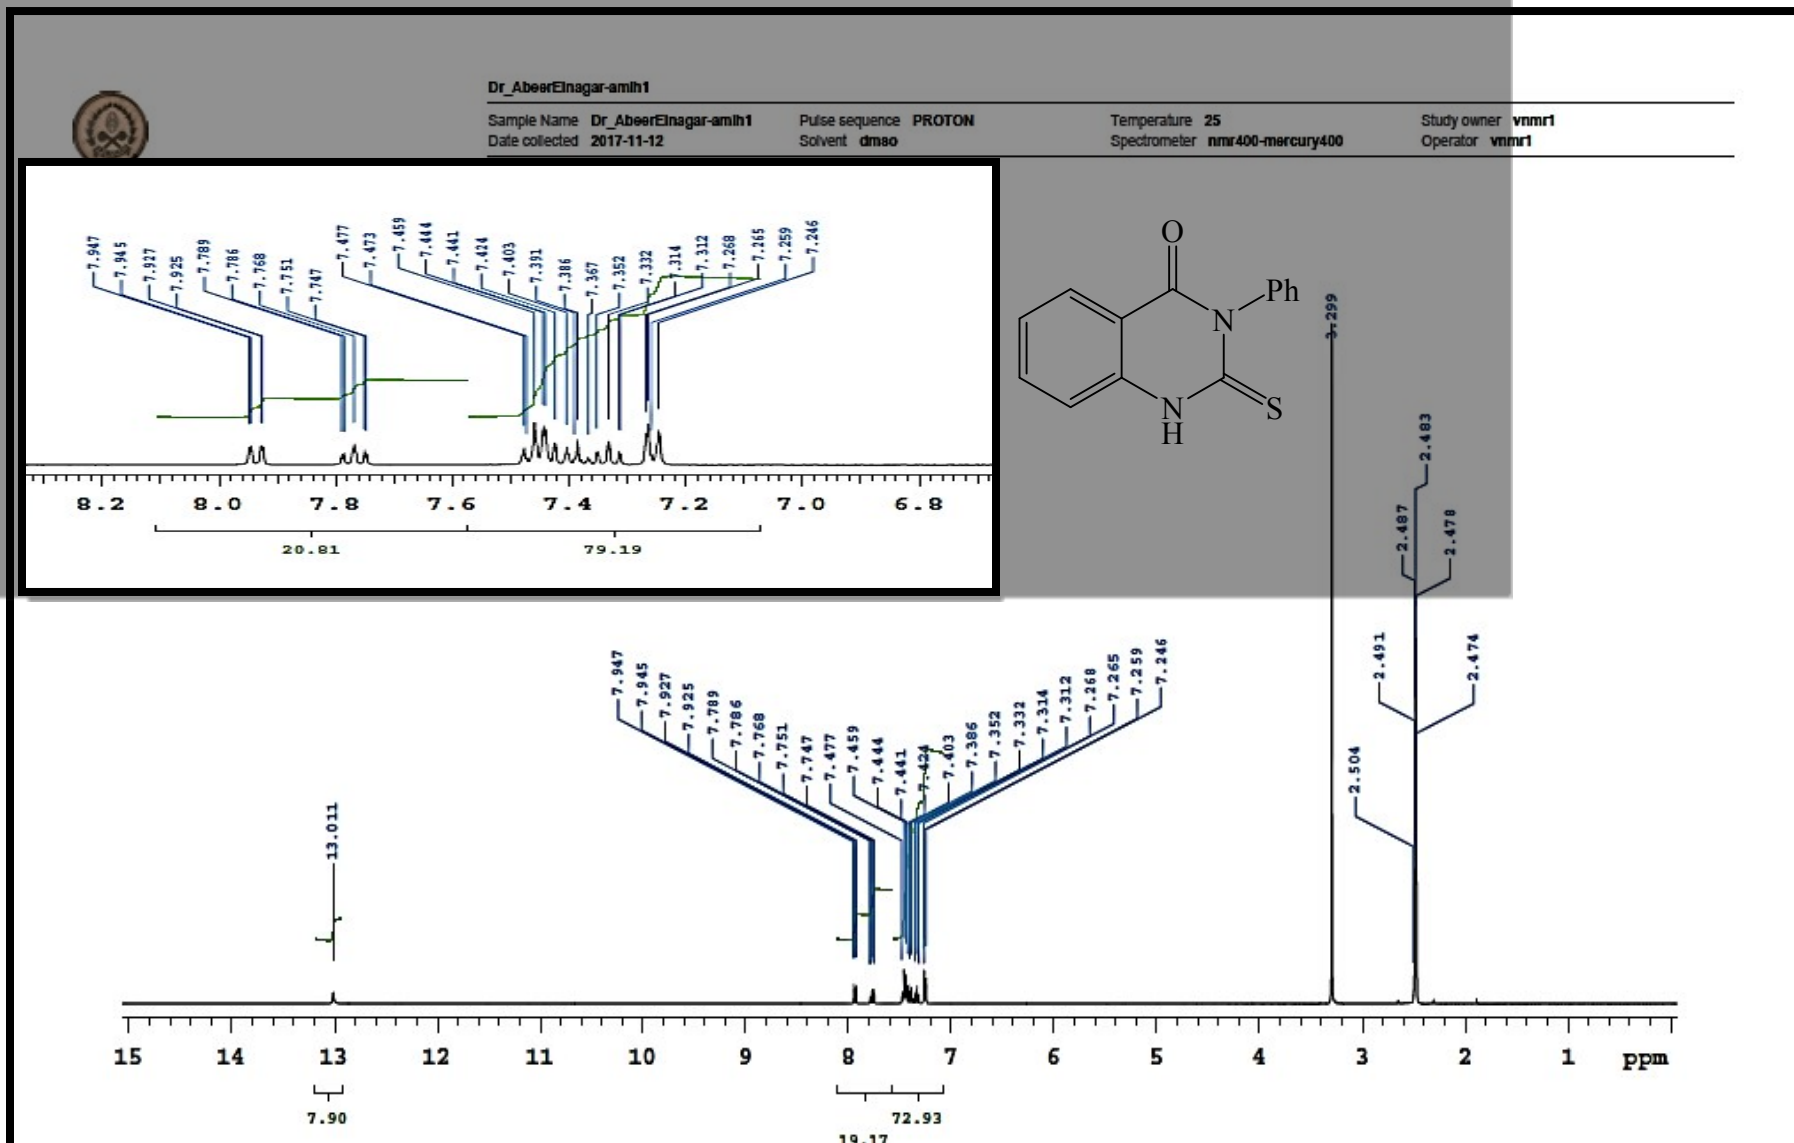

# HNMR-D2O

Dr\_AbeerElnagar-amih1-D2O

Sample Name **Dr\_AbeerElnagar-amih1-D2O** Pulse sequence **PROTON**  
Date collected **2017-11-13** Solvent **dms**

Temperature **25**  
Spectrometer **nmr400-mercury400**

Study owner **vnmr1**  
Operator **vnmr1**

agar-amih1-D2O

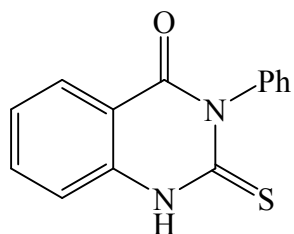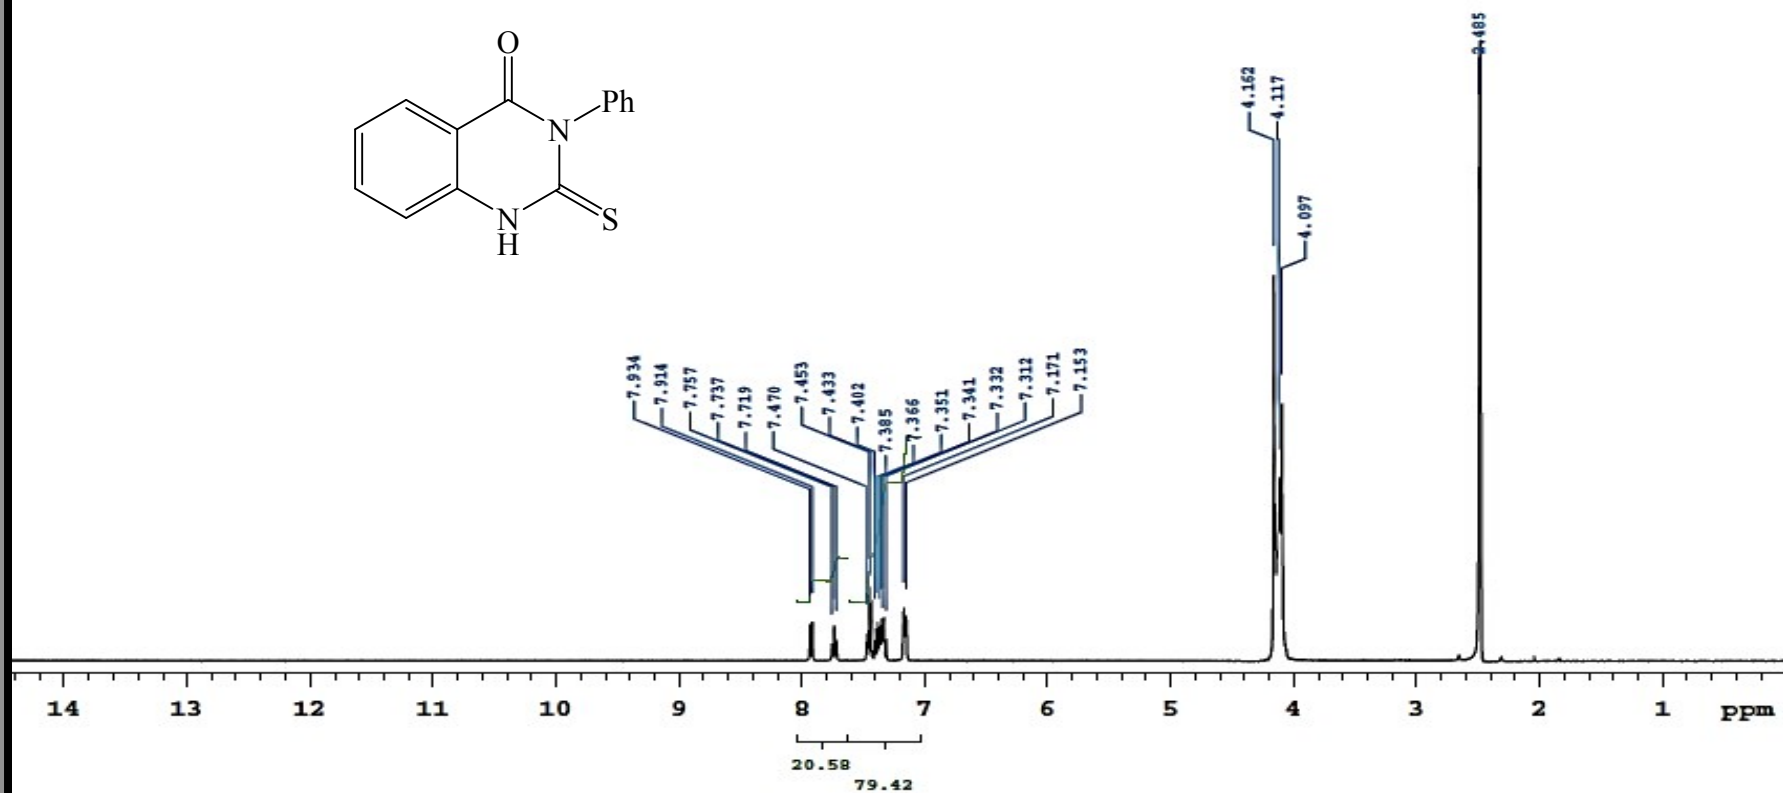

*Methyl 4-(2-((4-oxo-3-phenyl-3,4-dihydroquinazolin-2-yl)thio)acetamido)benzoate (5a).*

**IR**

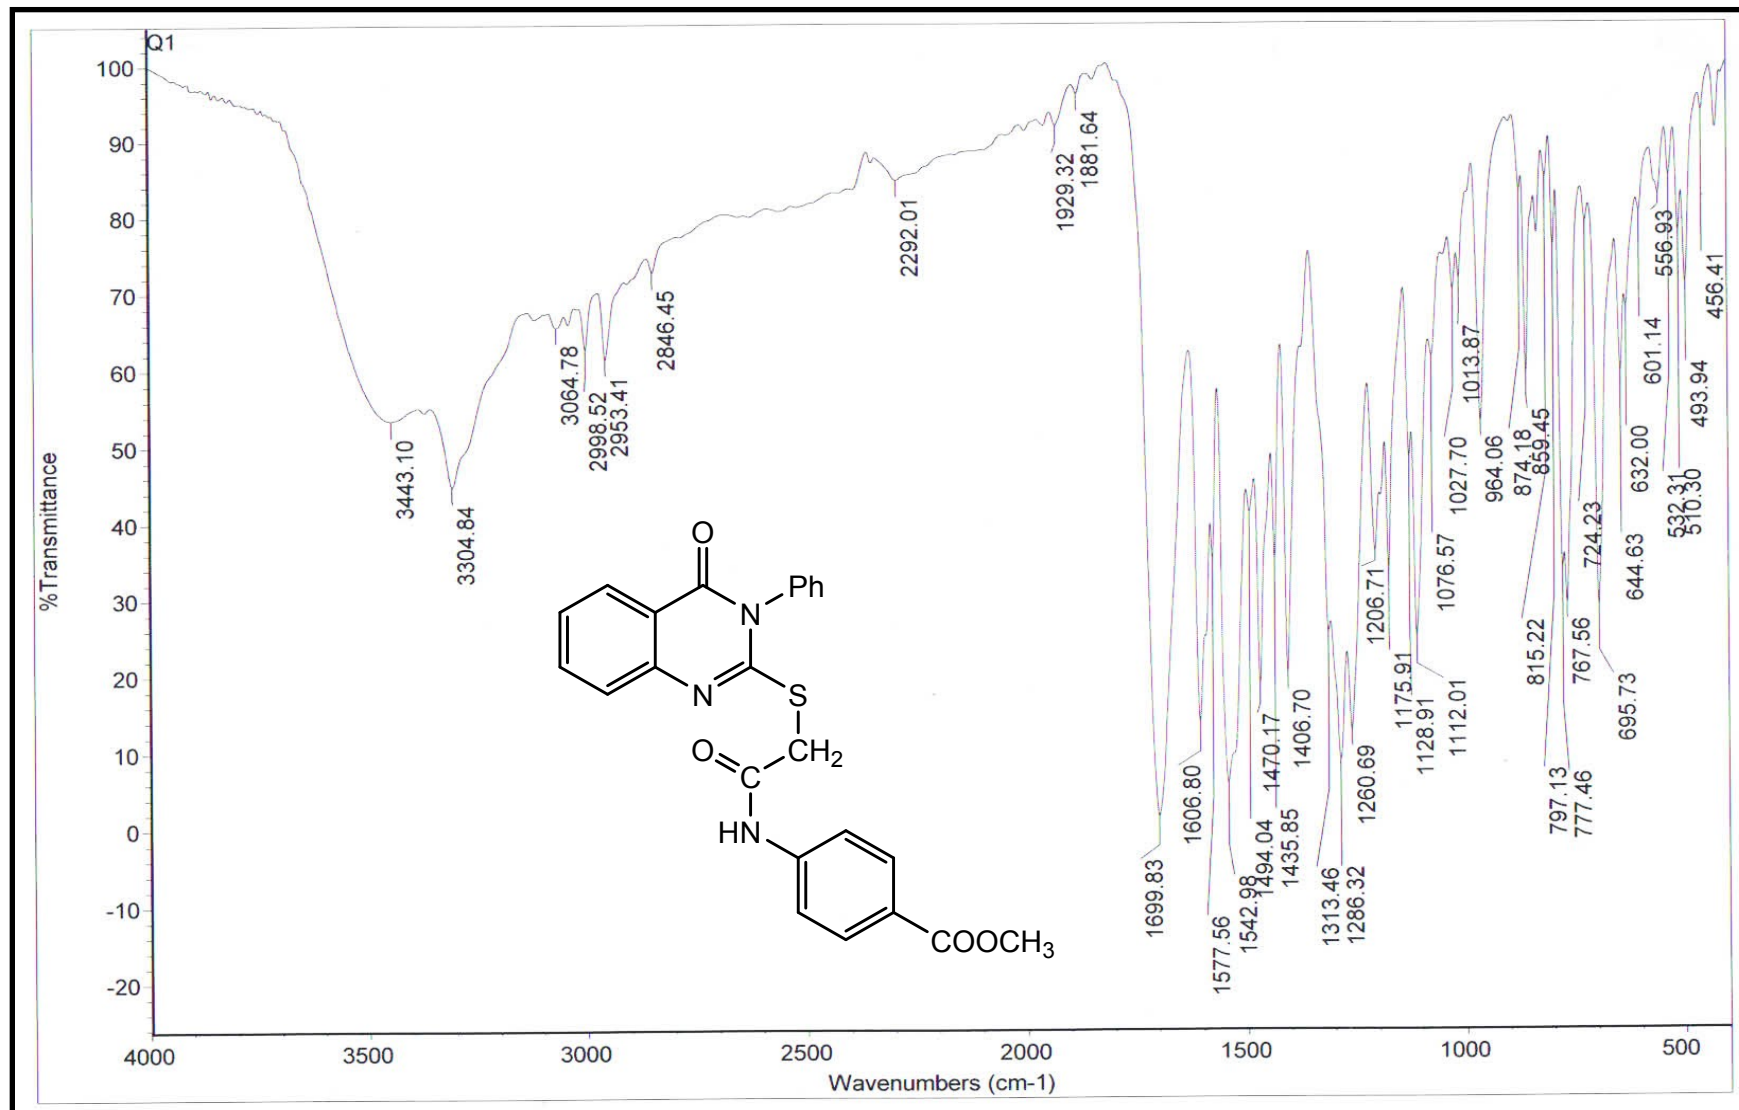

<sup>1</sup>H NMR

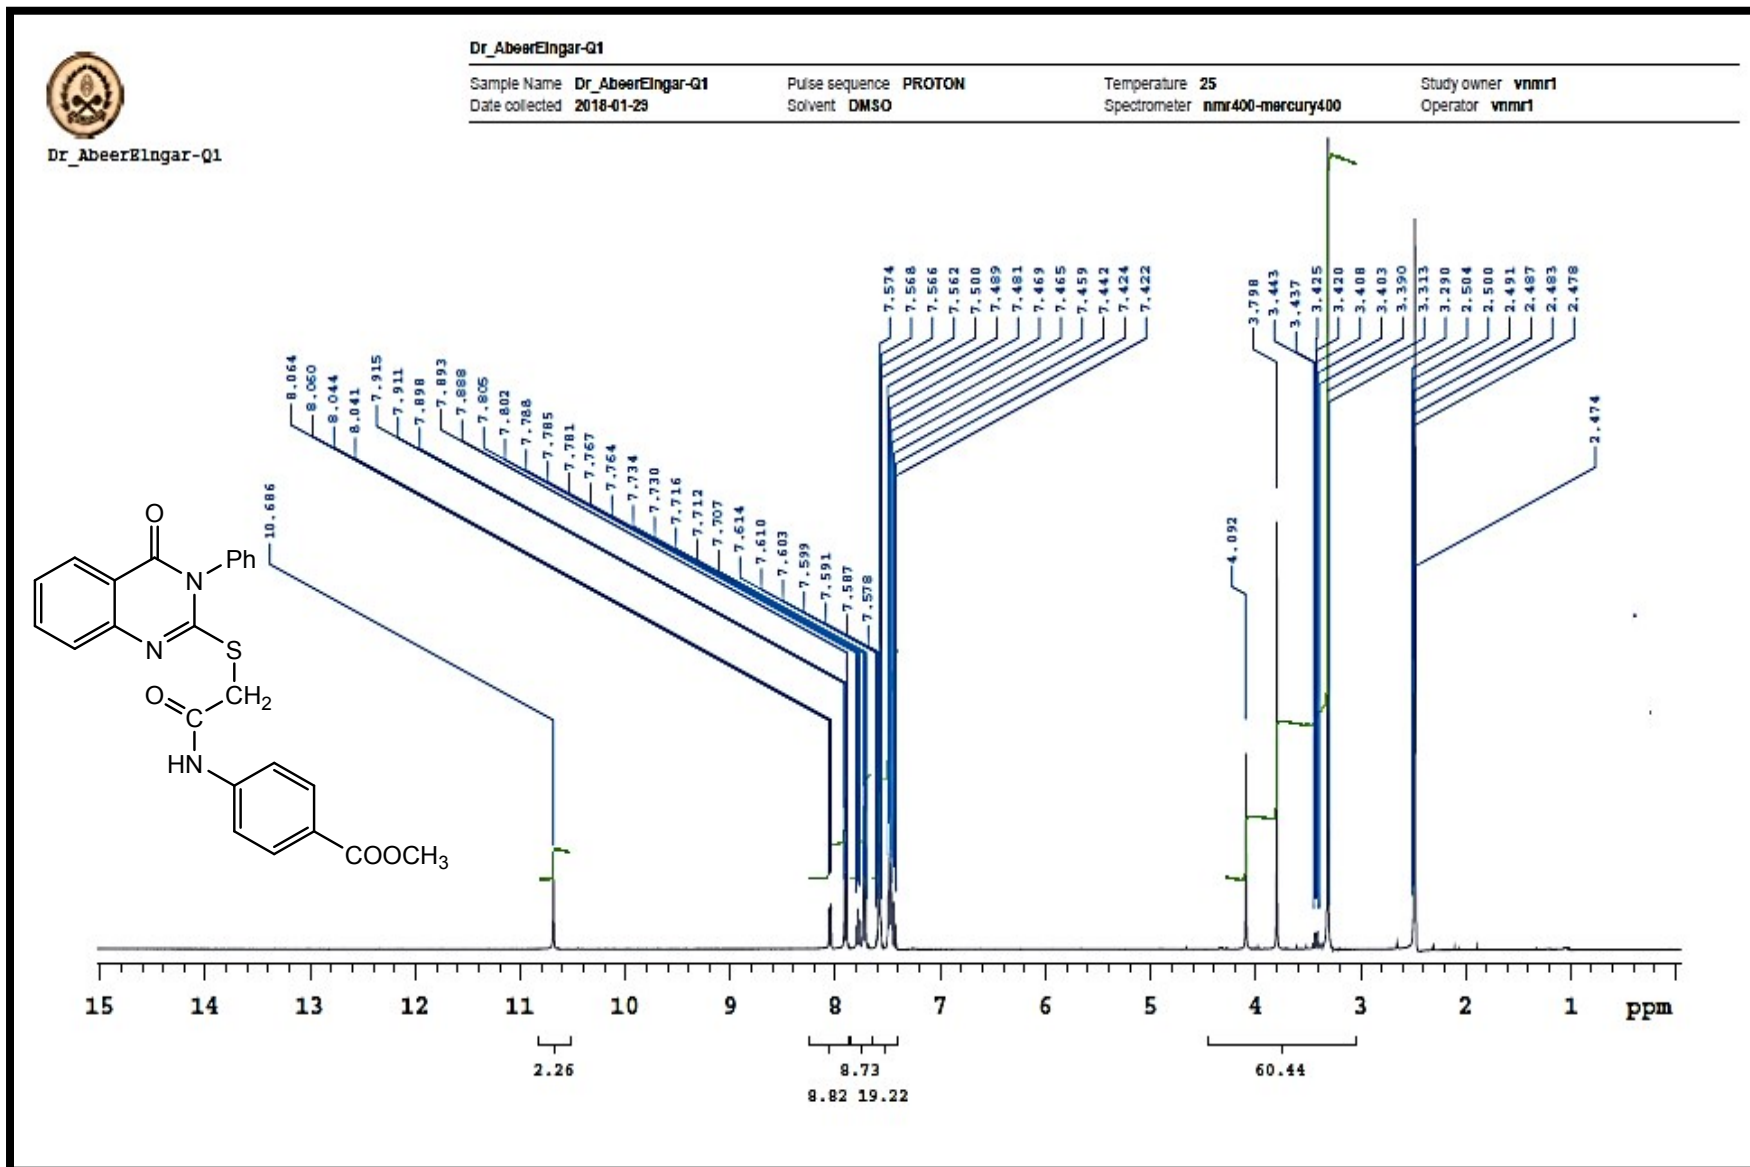

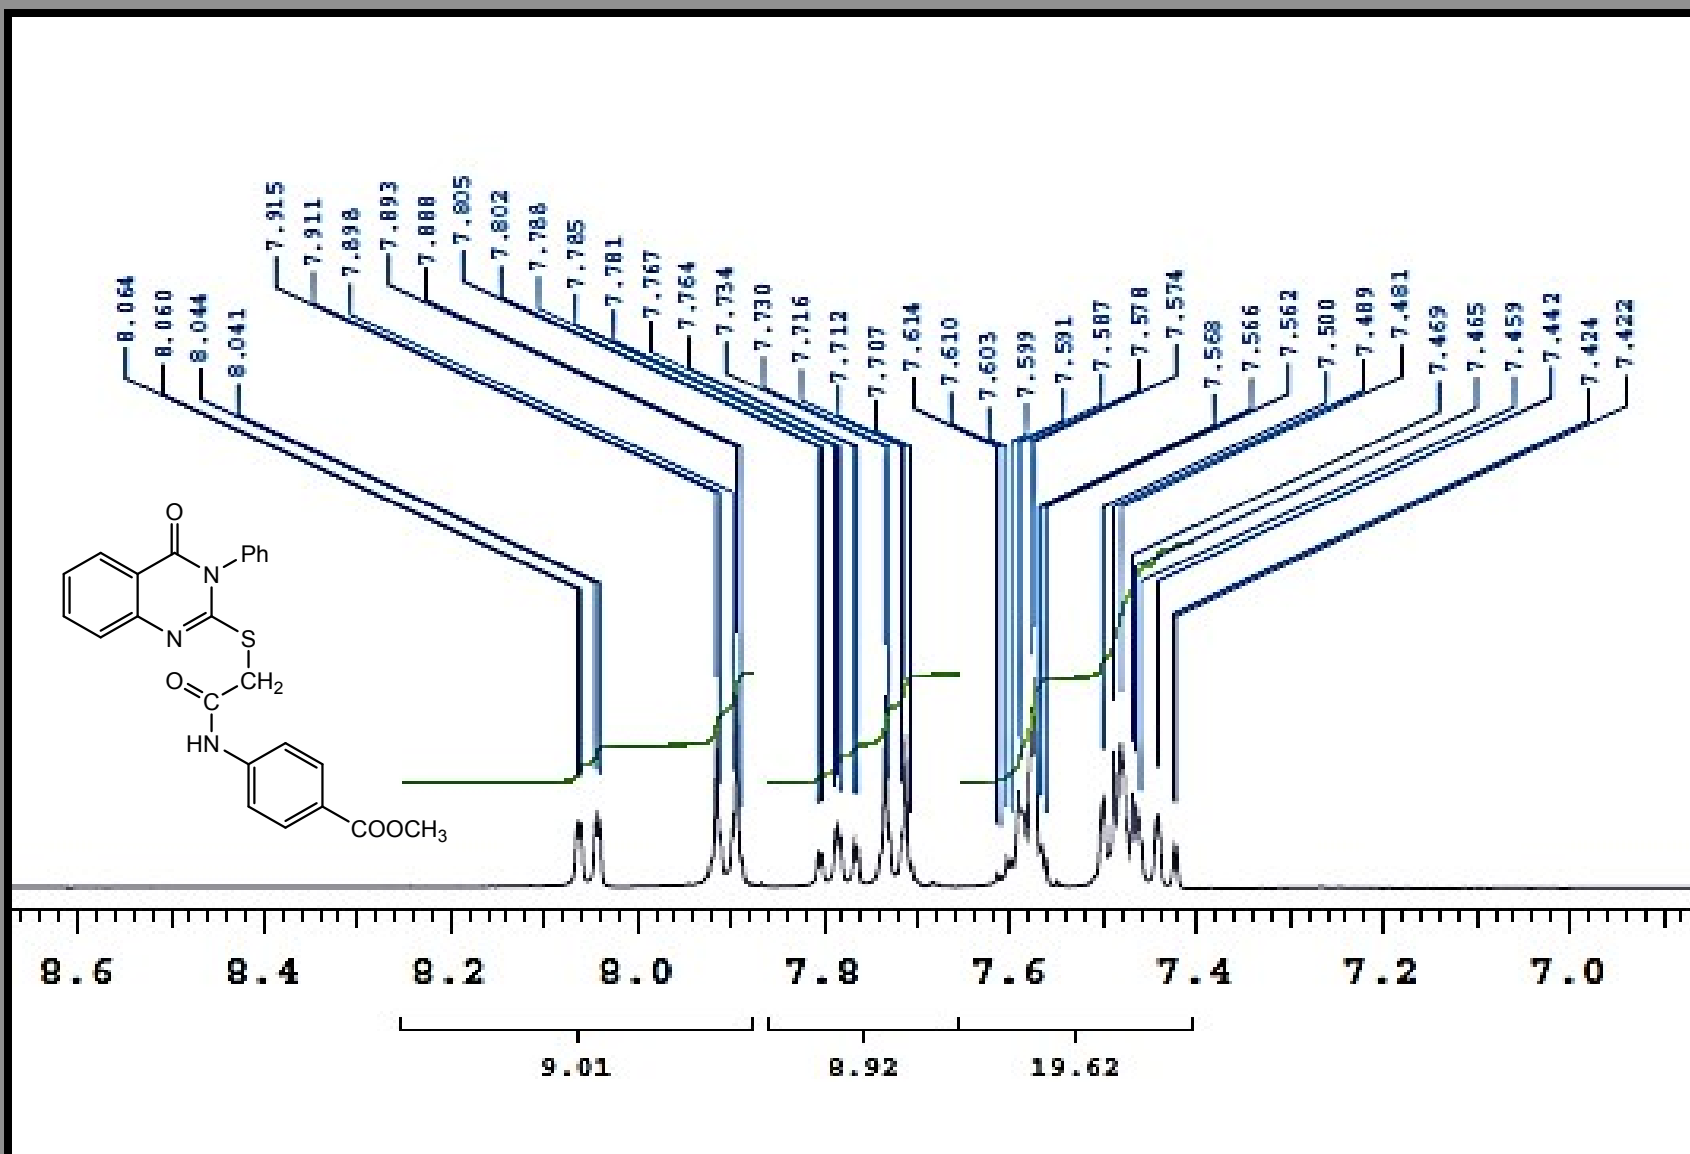

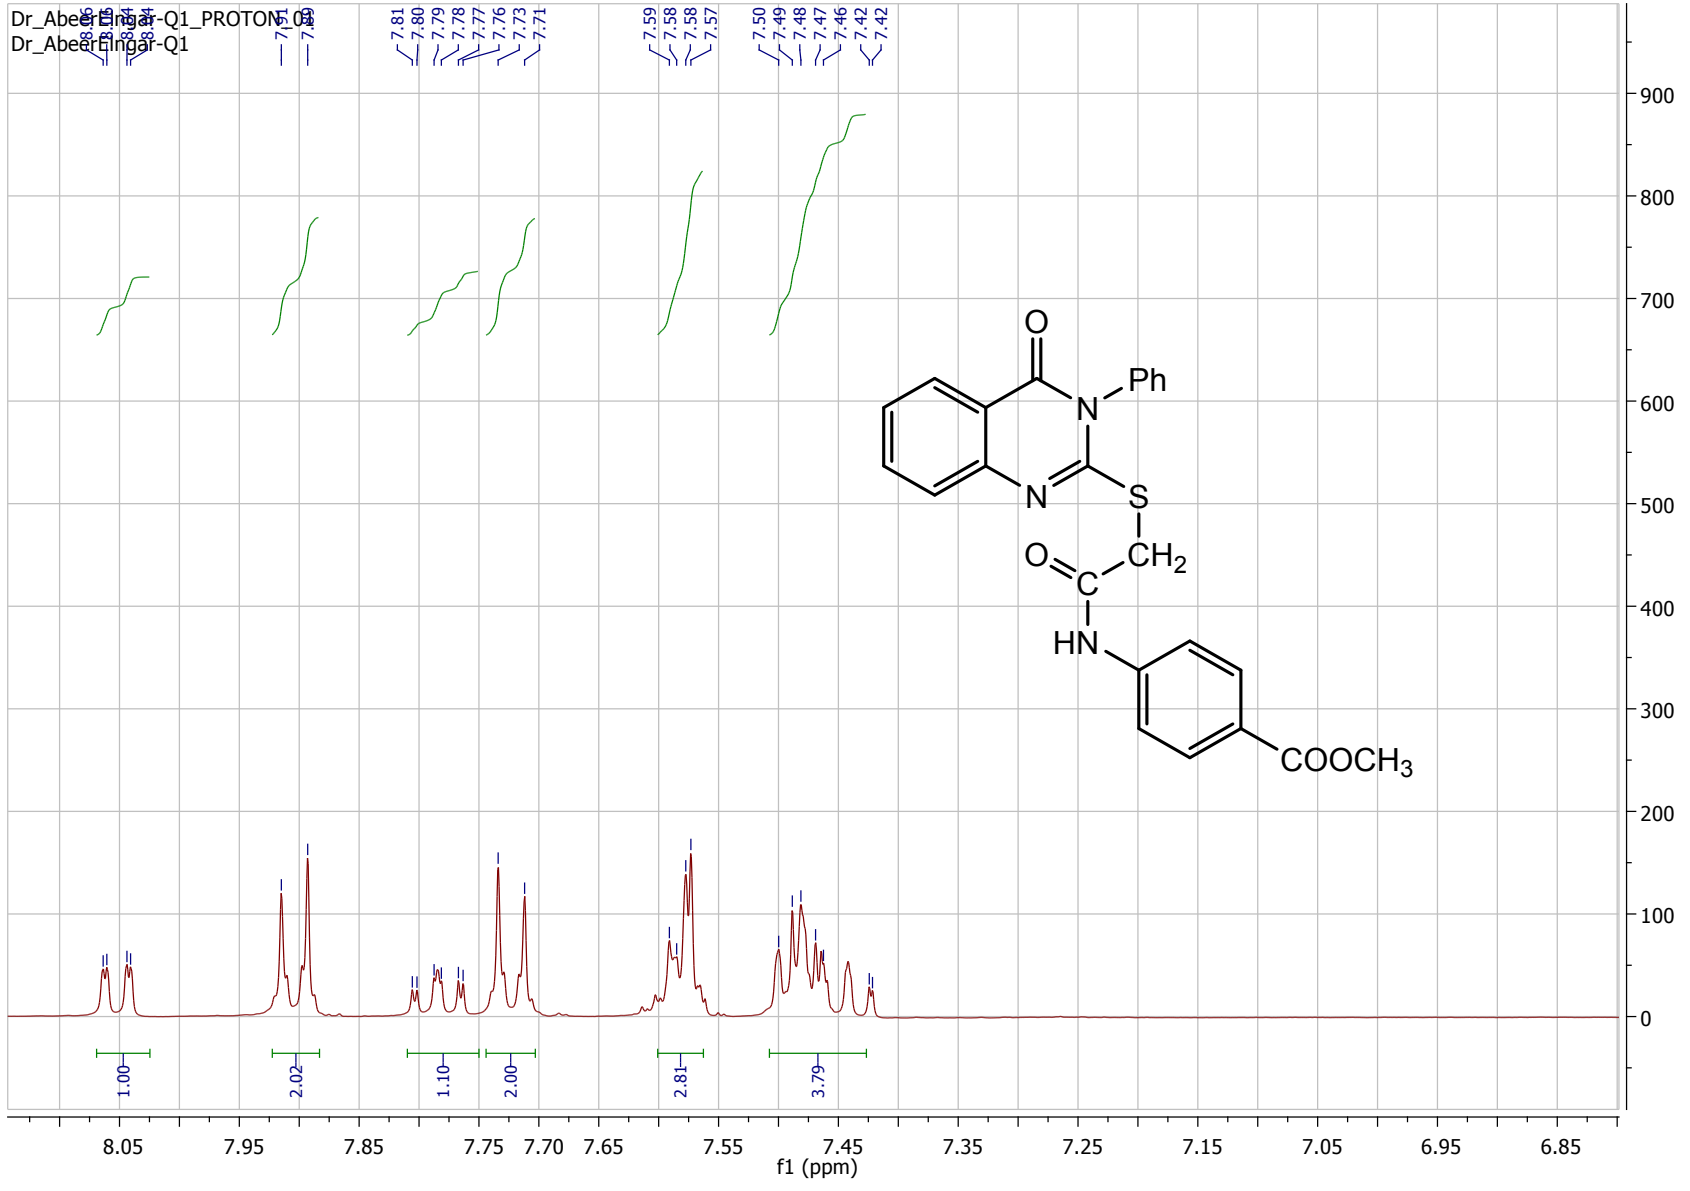



D20

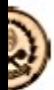

Dr\_AbeerEingar-Q1-D20

Sample Name Dr\_AbeerEingar-Q1-D20  
Date collected 2018-01-30

Pulse sequence PROTON  
Solvent DMSO

Temperature 25  
Spectrometer nmr400-mercury400

Study owner vnmr1  
Operator vnmr1

Dr\_AbeerEingar-Q1-D20

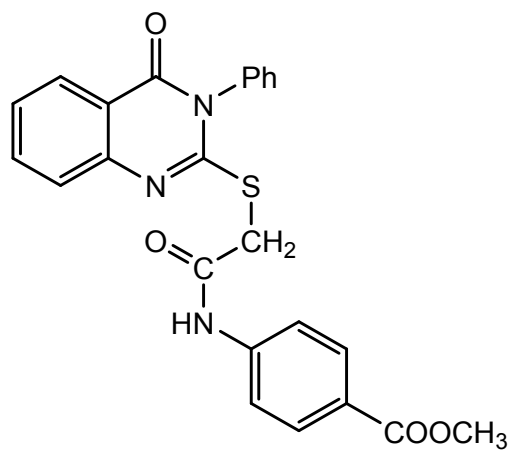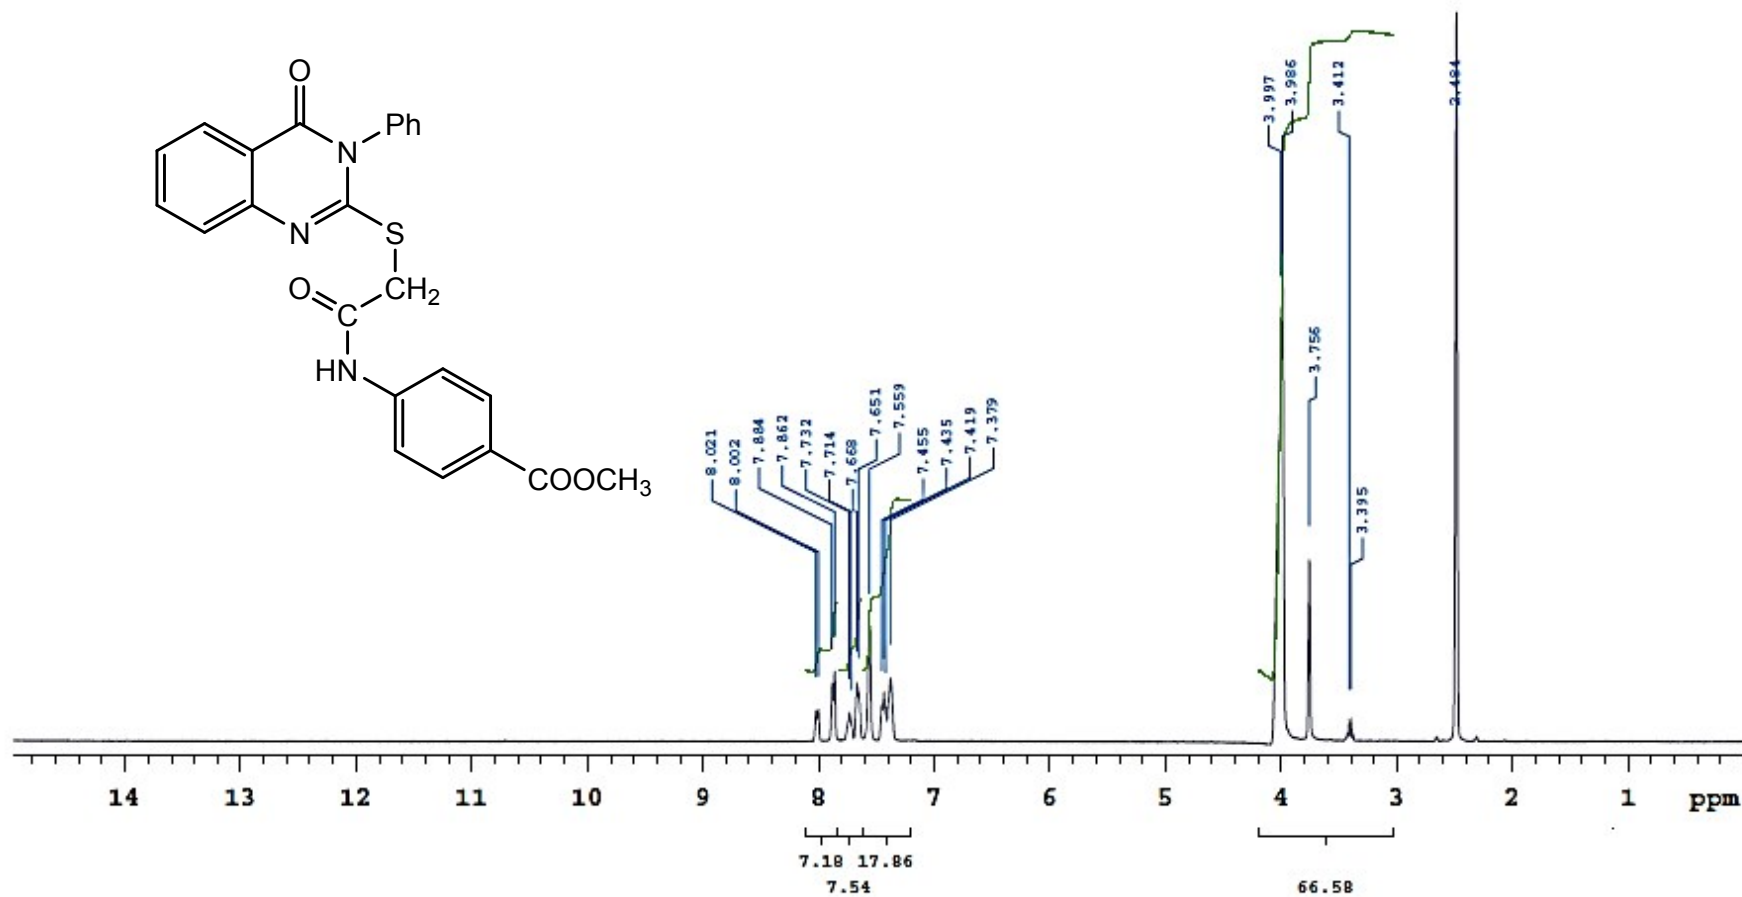

Mass

sayed-karam-Q1 #167 RT: 2.81 AV: 1 SB: 2 4.49 , 4.49 NL: 2.11E4  
T: {0,0} + c EI Full ms [40.00-1000.00]

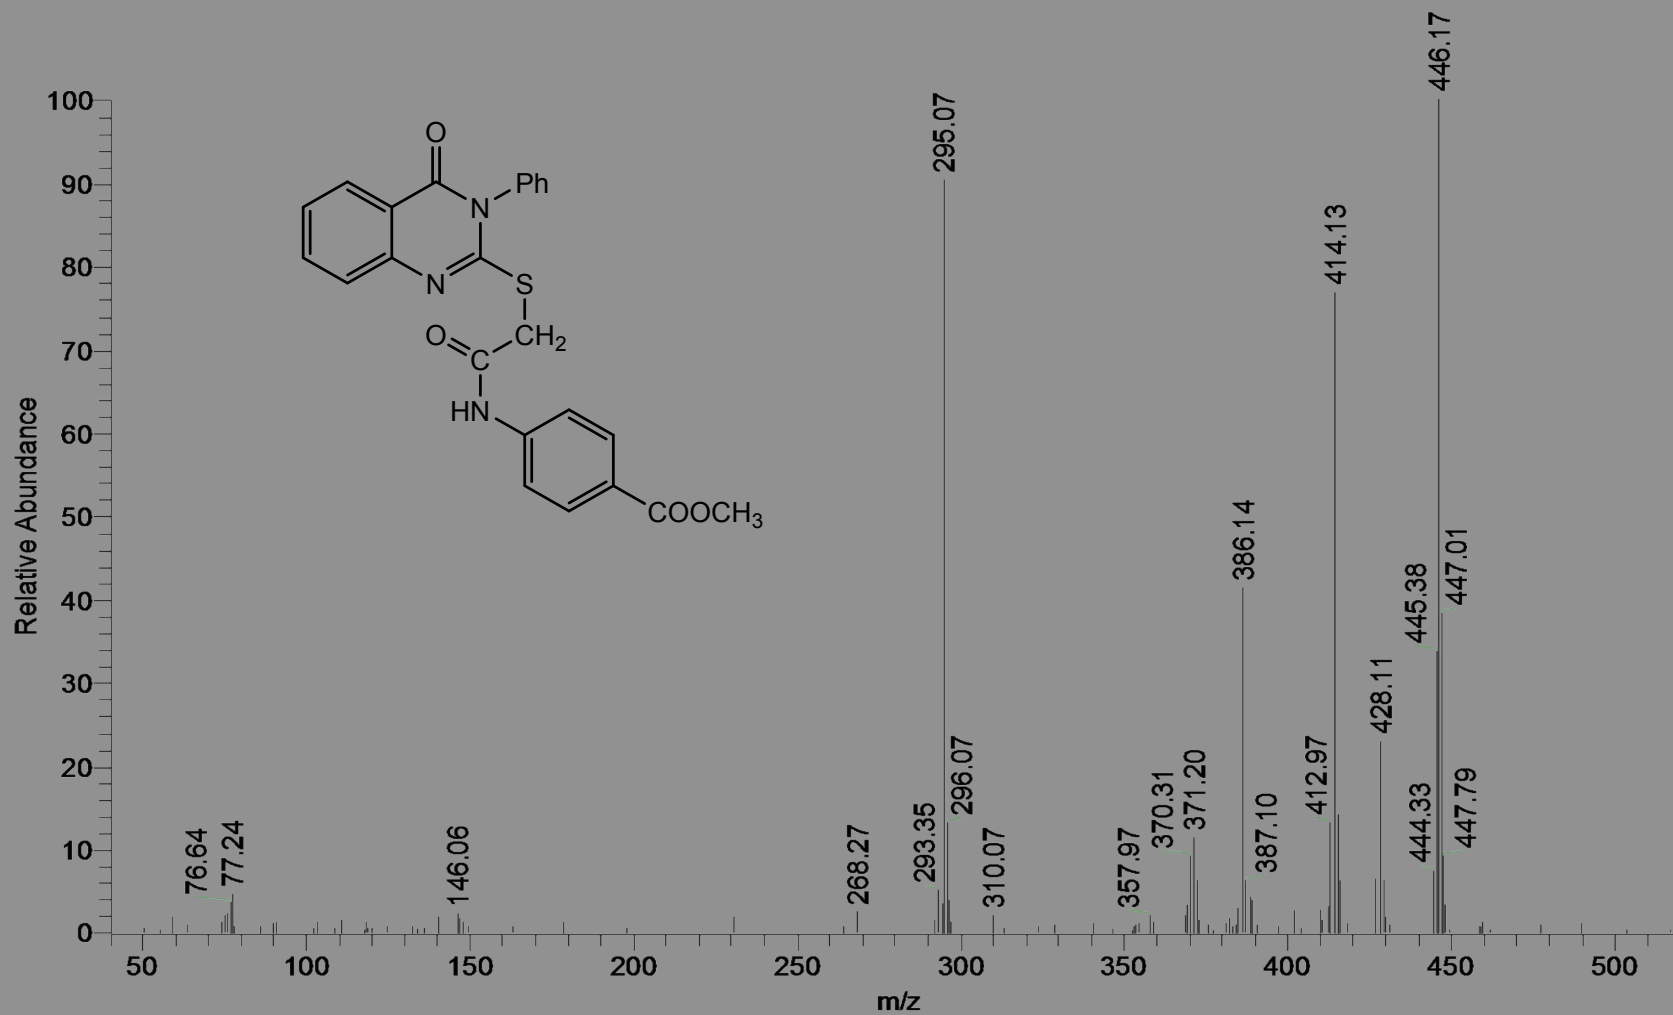

*N*-(4-acetylphenyl)-2-((4-oxo-3-phenyl-3,4-dihydroquinazolin-2-yl)thio)acetamide (5b).

IR

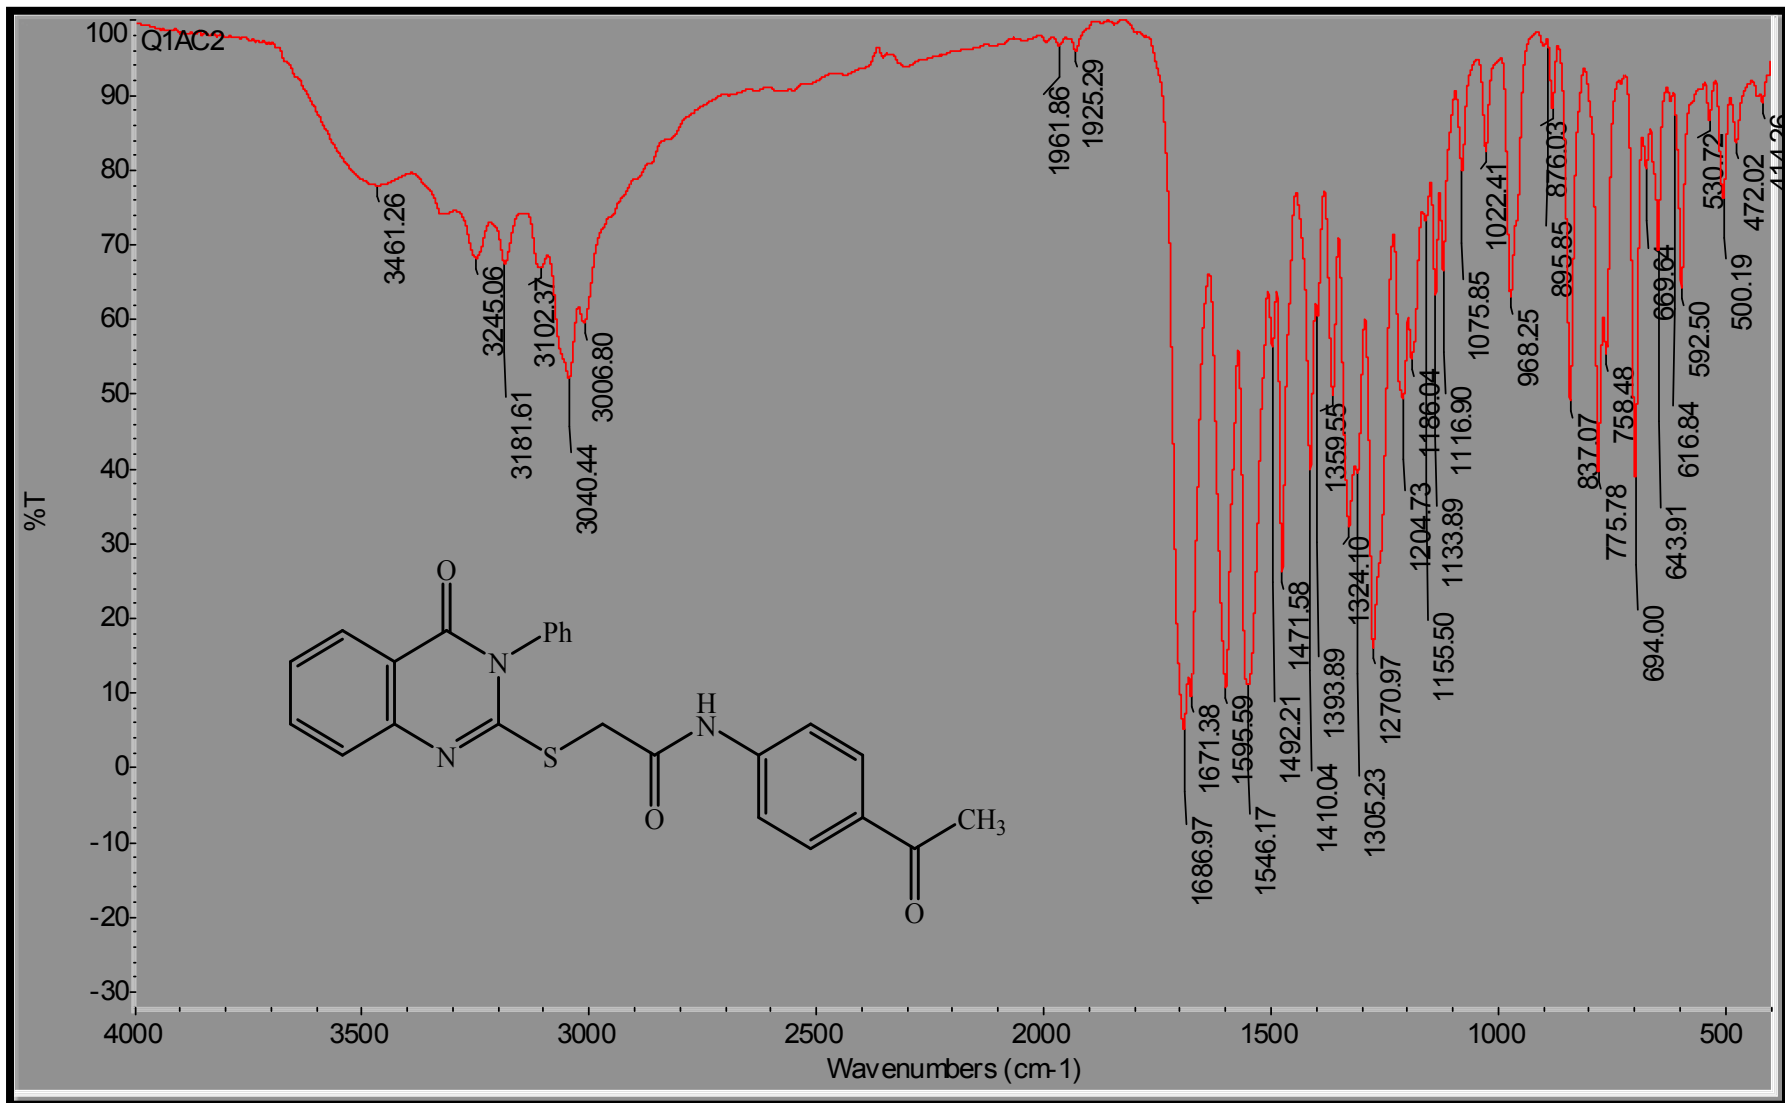

*HNMR*

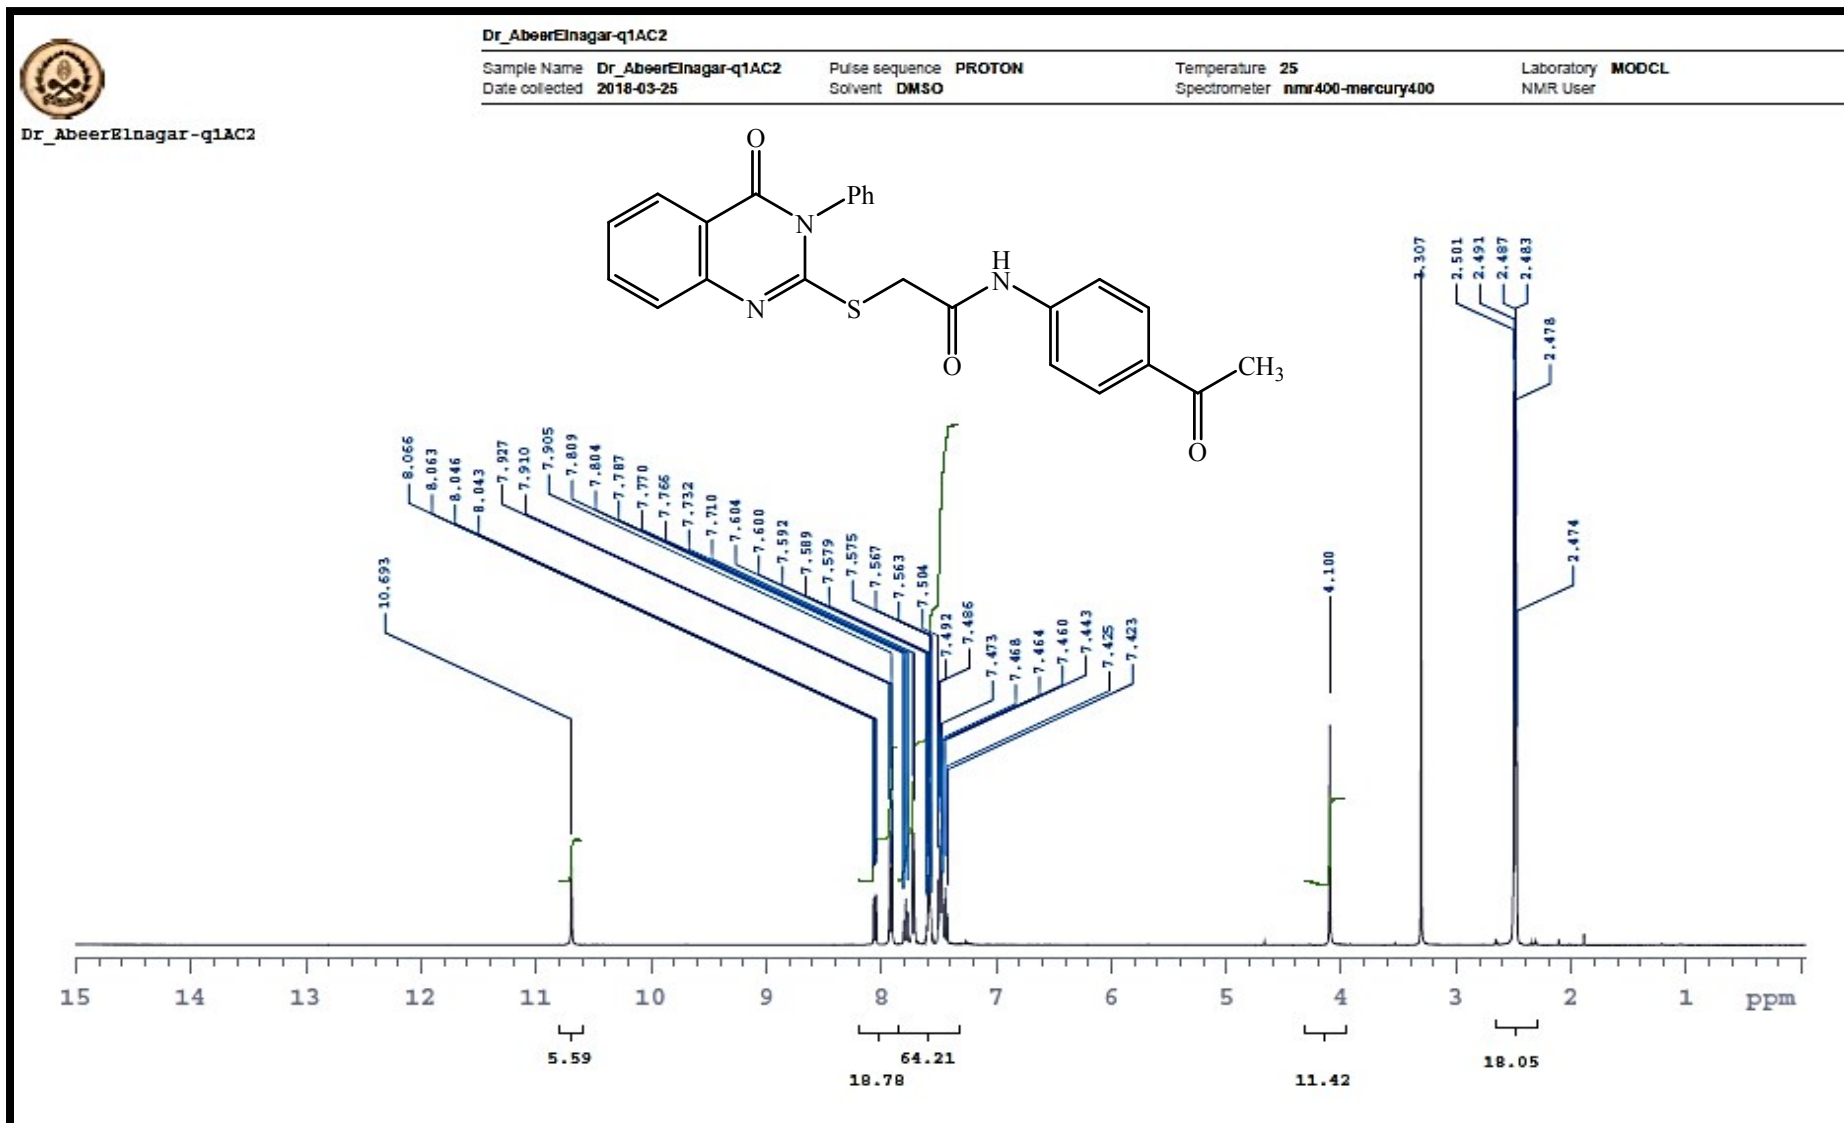

**Dr\_AbeerElnagar-q1AC2**

Sample Name **Dr\_AbeerElnagar-q1AC2**  
Date collected **2018-03-25**

Pulse sequence **PROTON**  
Solvent **DMSO**

Temperature **25**  
Spectrometer **nmr400-**

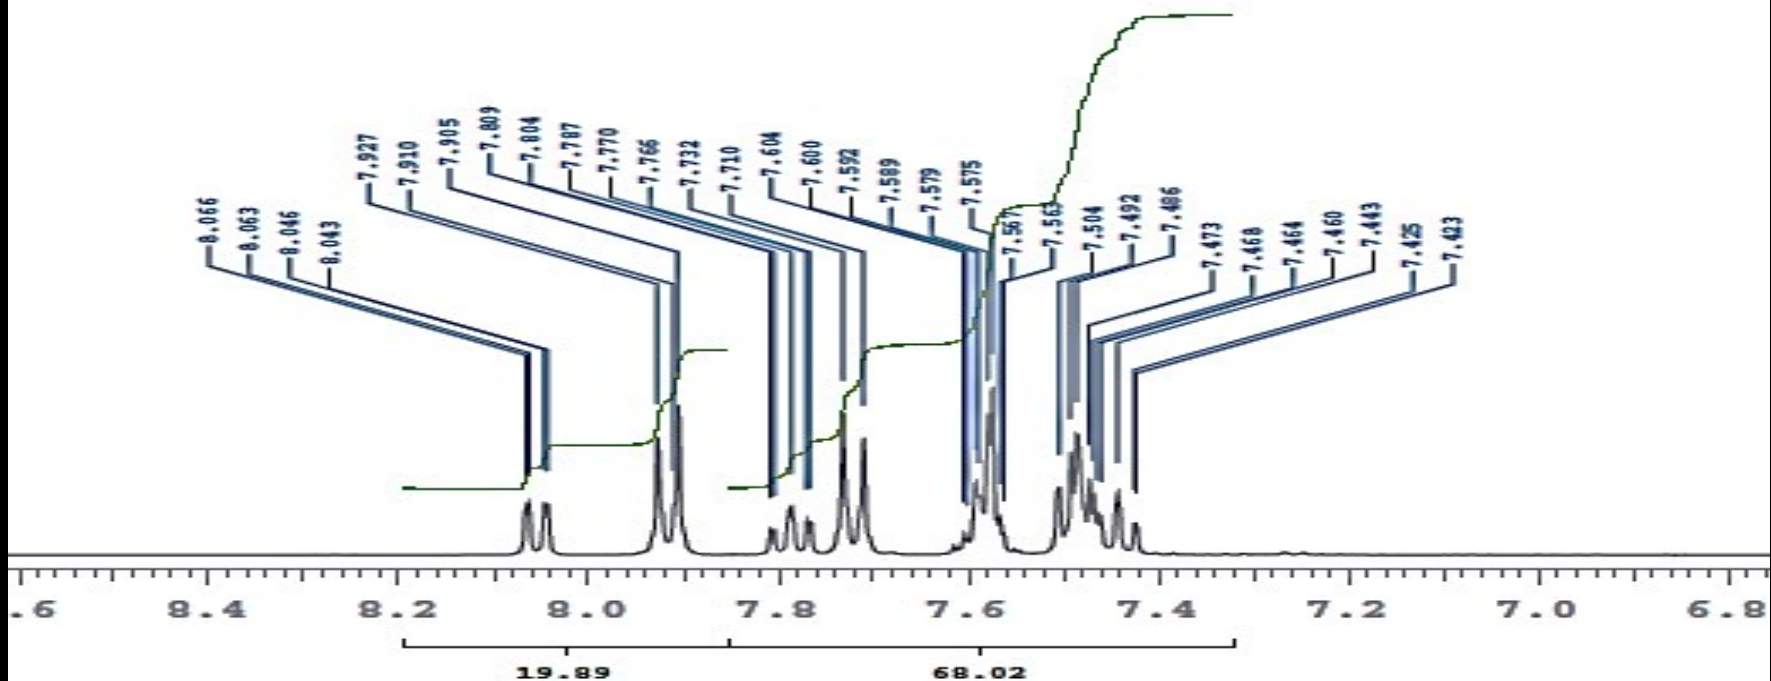

Mass

sayed-karam-Q1AC2 #166 RT: 2.79 AV: 1 SB: 2 4.47, 4.47 NL: 1.44E4  
T: {0,0} + c EI Full ms [40.00-1000.00]

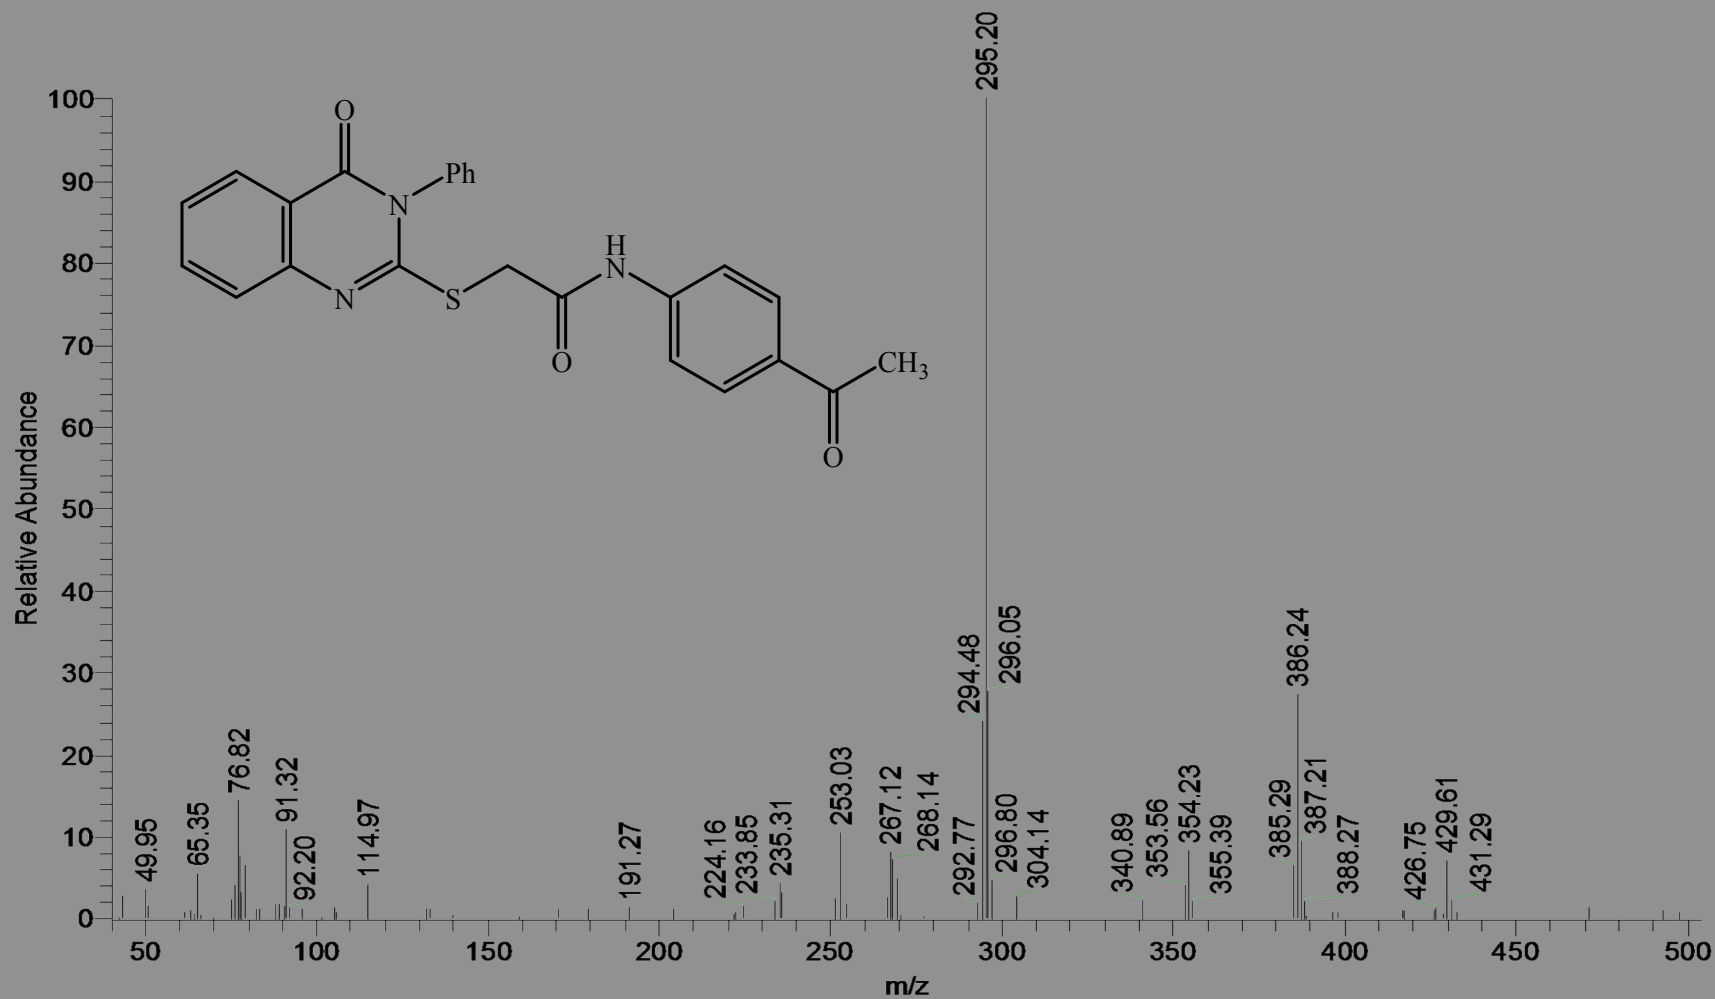

*2-((4-Oxo-3-phenyl-3,4-dihydroquinazolin-2-yl)thio)-N-(4-sulfamoylphenyl)acetamide (5c).*

**I.R**

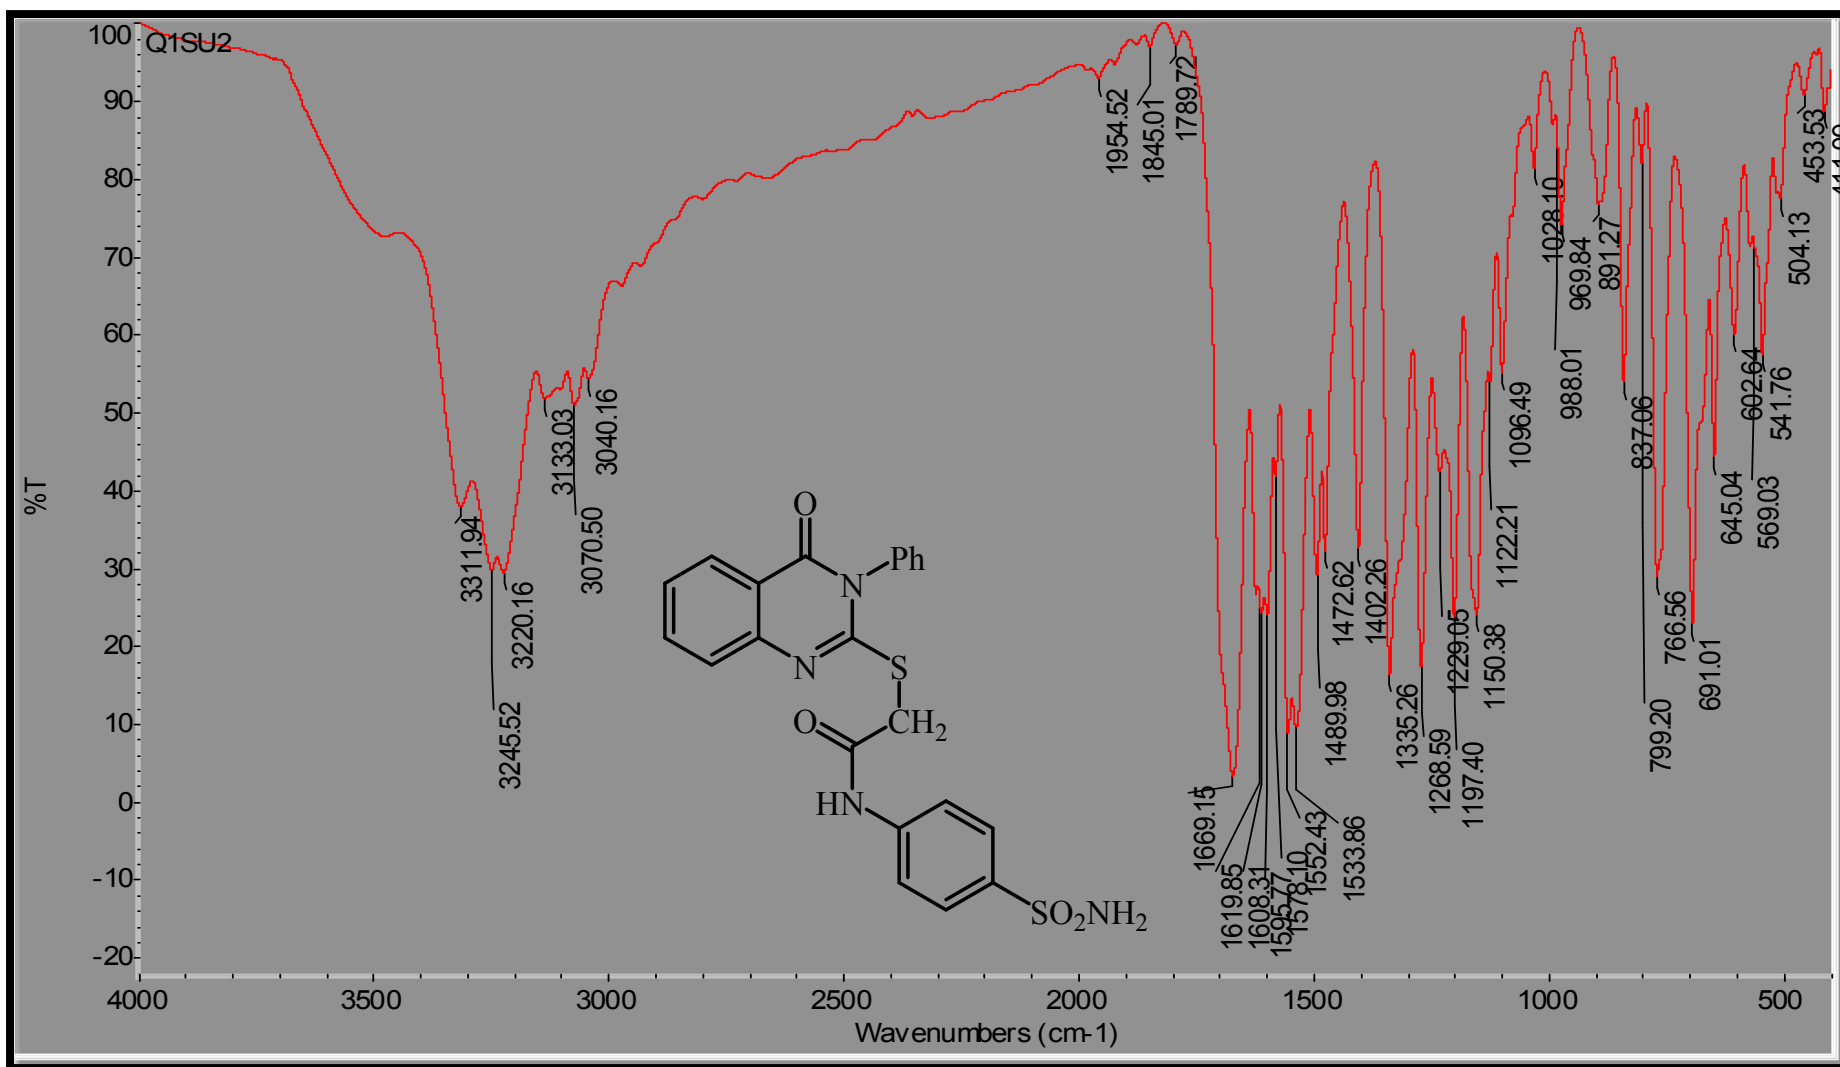

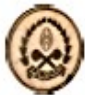

Dr\_AbeerElnagar-q1su2

Sample Name Dr\_AbeerElnagar-q1su2

Pulse sequence PROTON

Temperature 25

Laboratory MODCL

Date collected 2018-03-25

Solvent DMSO

Spectrometer nmr400-mercury400

NMR User sameeh\_Albadauy

Dr\_AbeerElnagar-q1su2

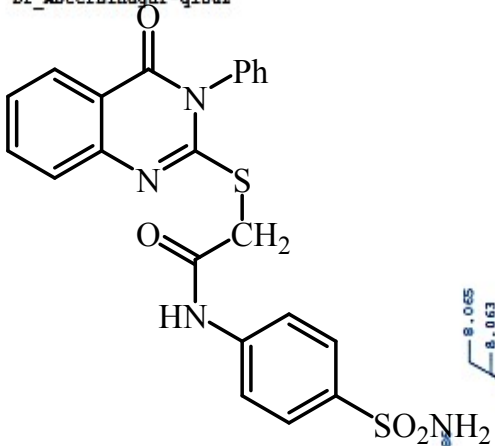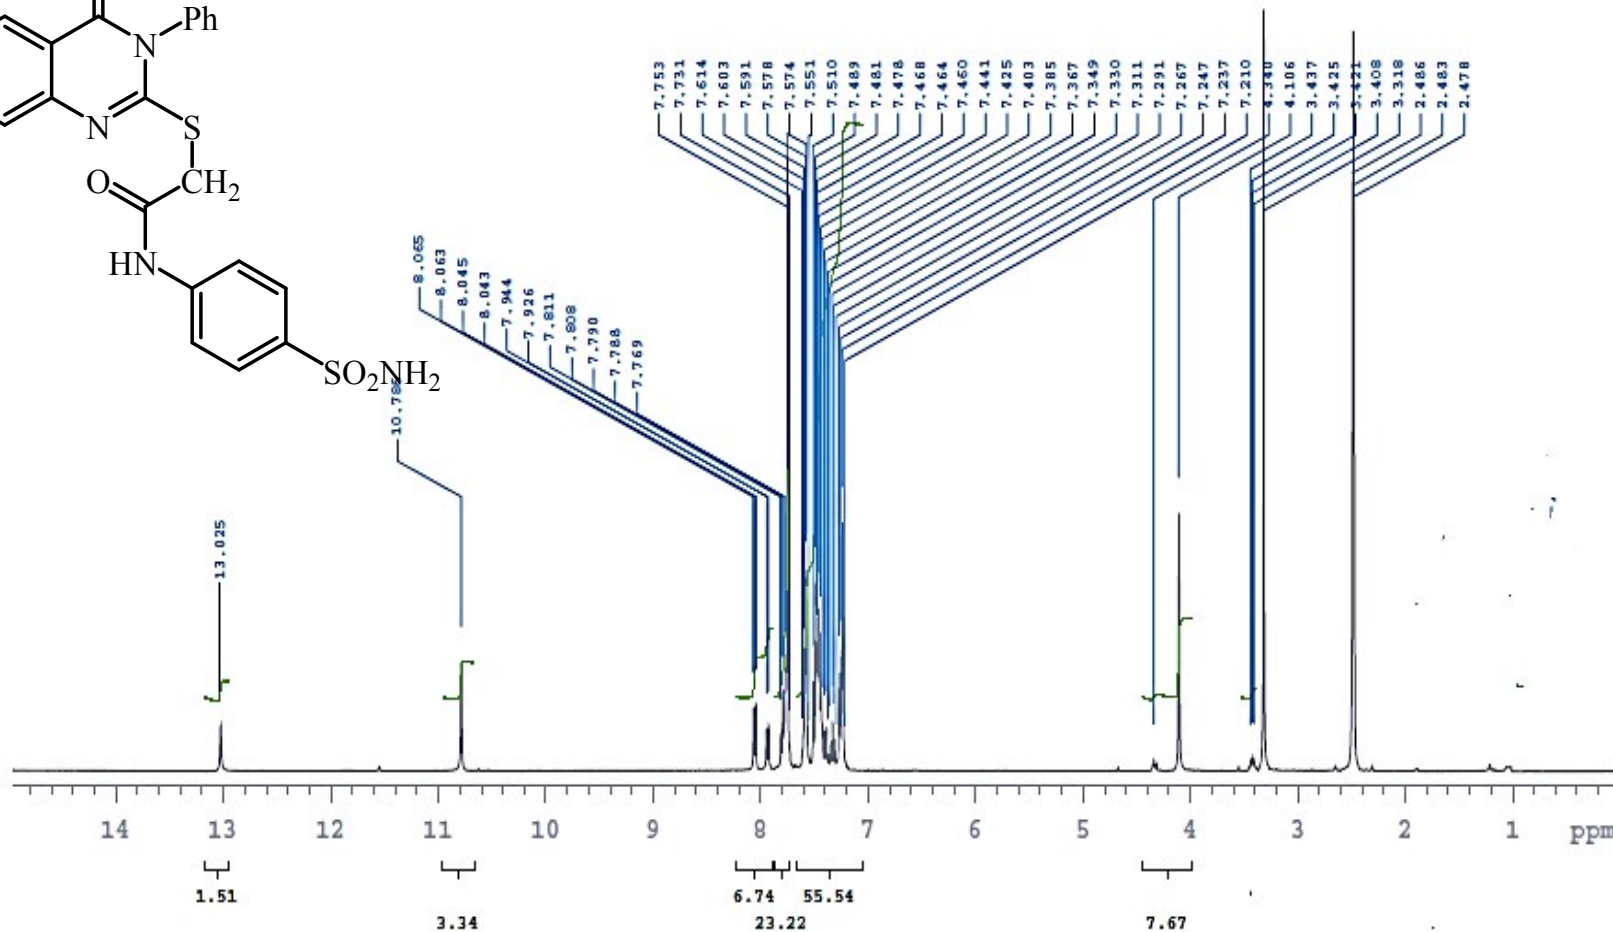



# HNMR

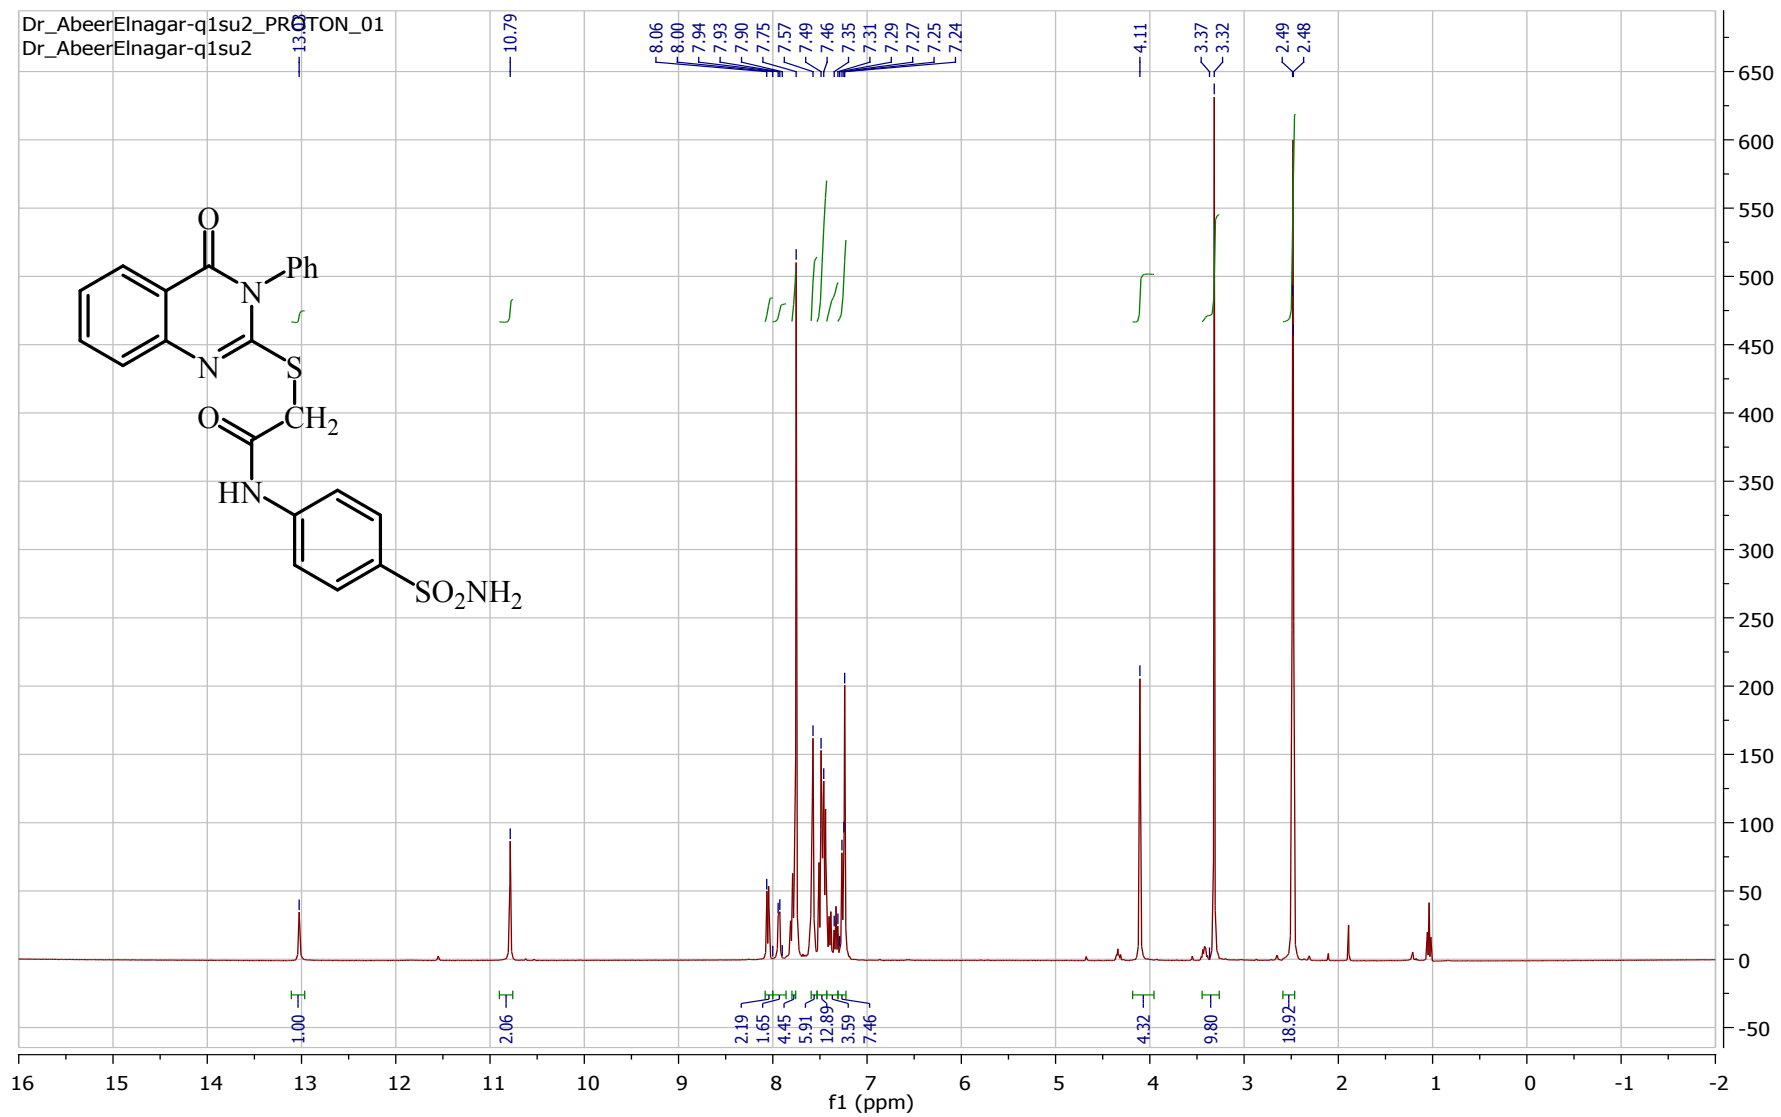

Dr\_AbeerElnagar-q1su2\_PROTON\_01  
Dr\_AbeerElnagar-q1su2

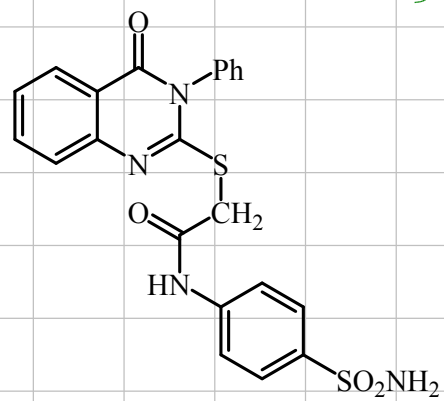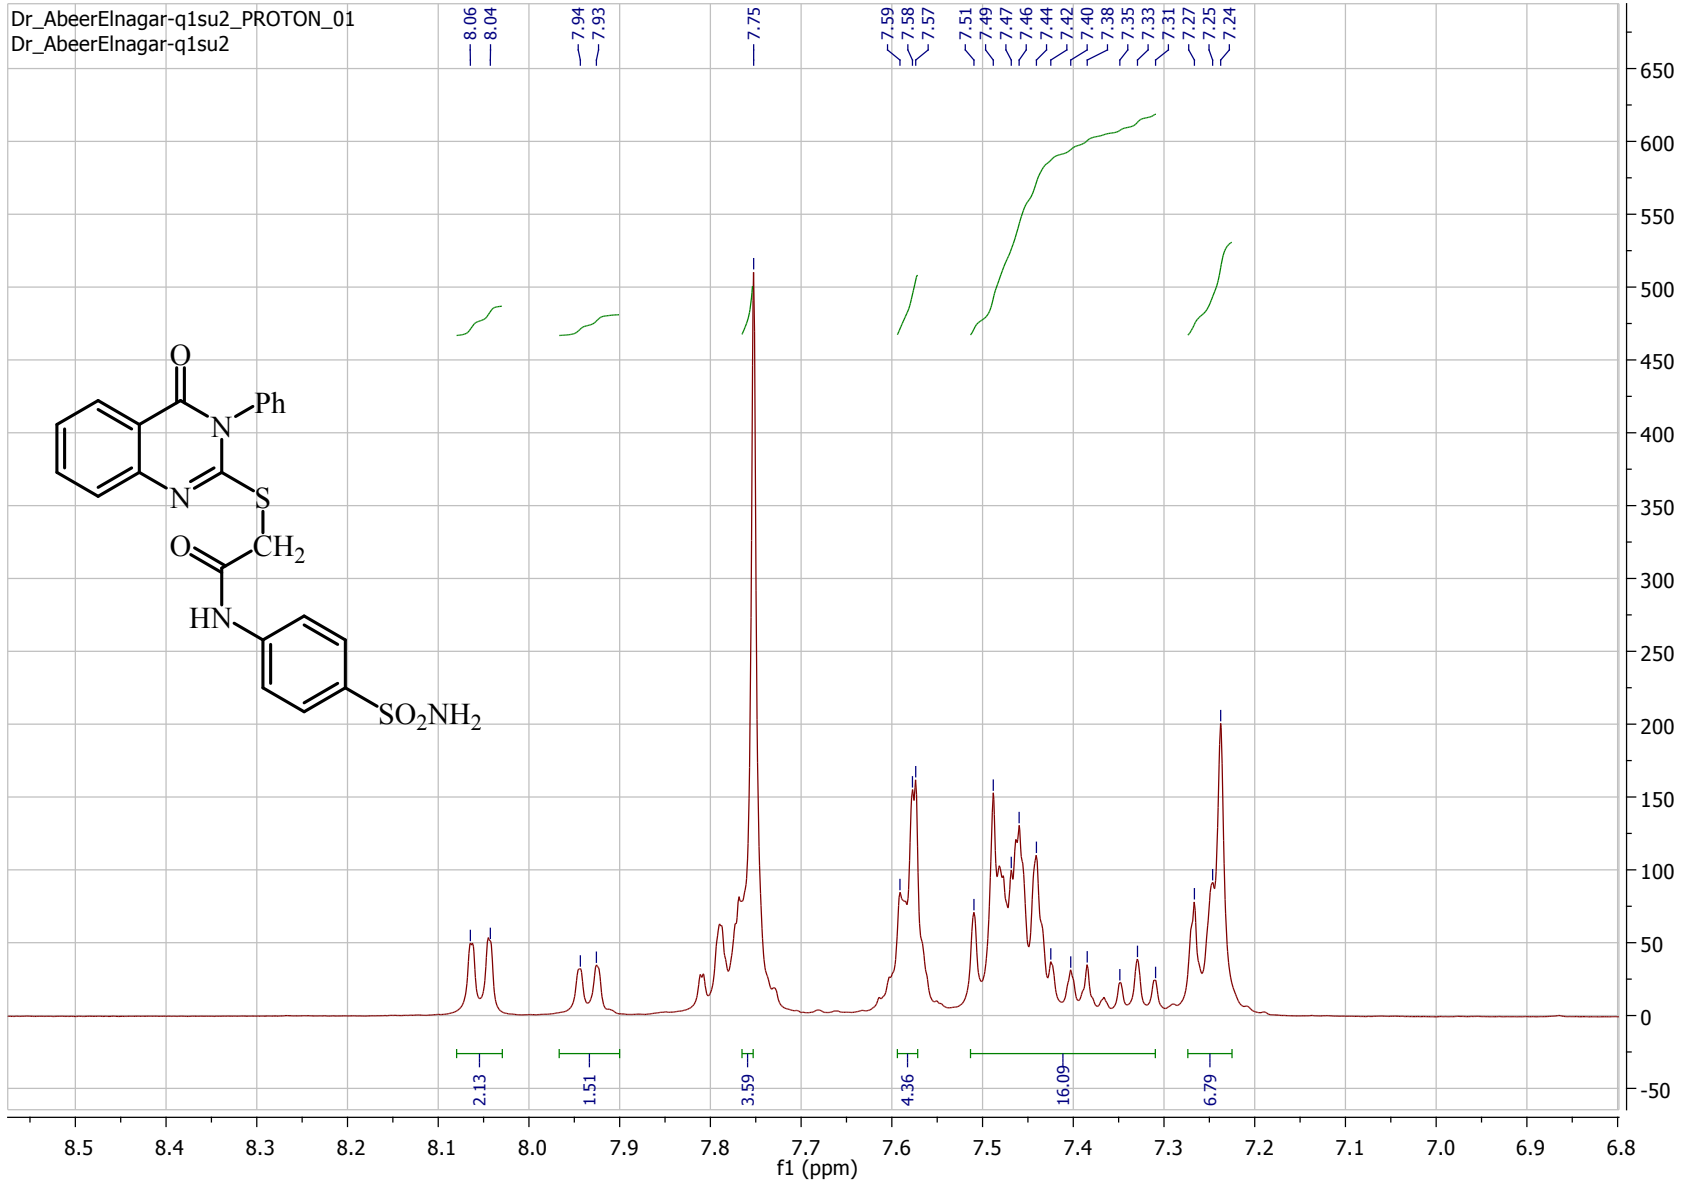

*Methyl 4-(2-(4-oxo-3-phenyl-2-thioxo-3,4-dihydroquinazolin-1(2H)-yl)acetamido)benzoate (6a).*

**IR**

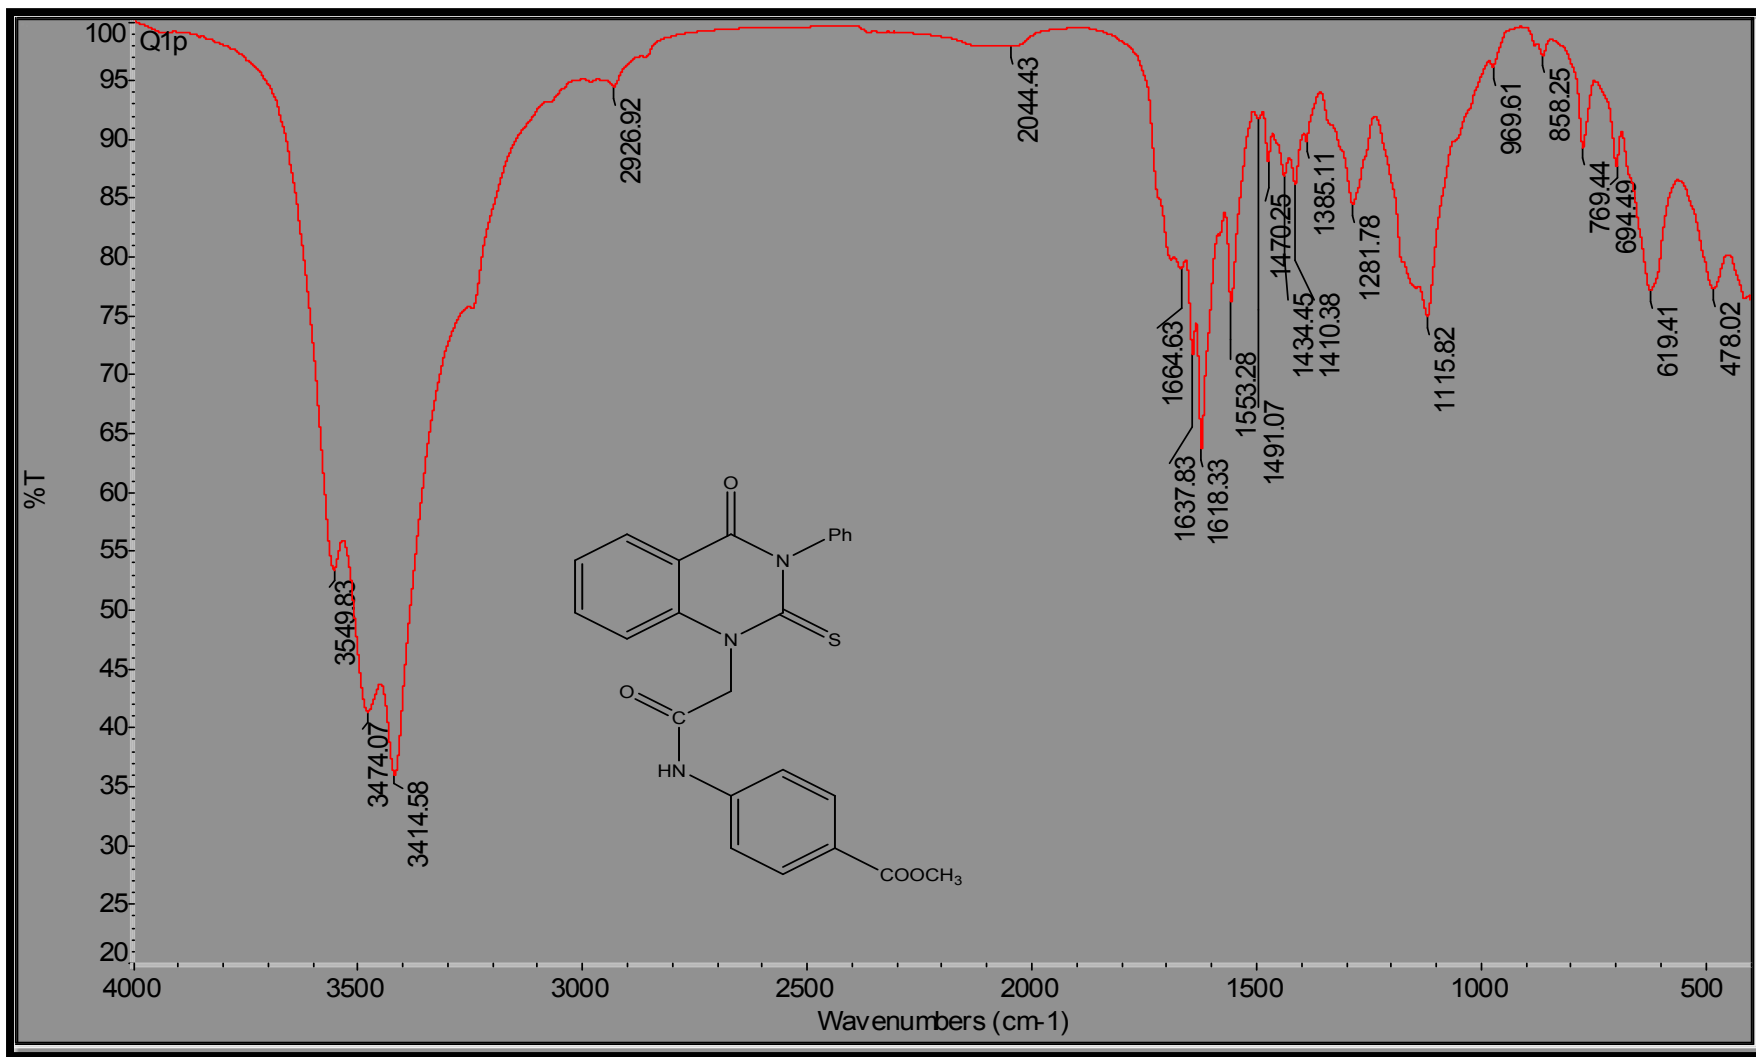

HNMR

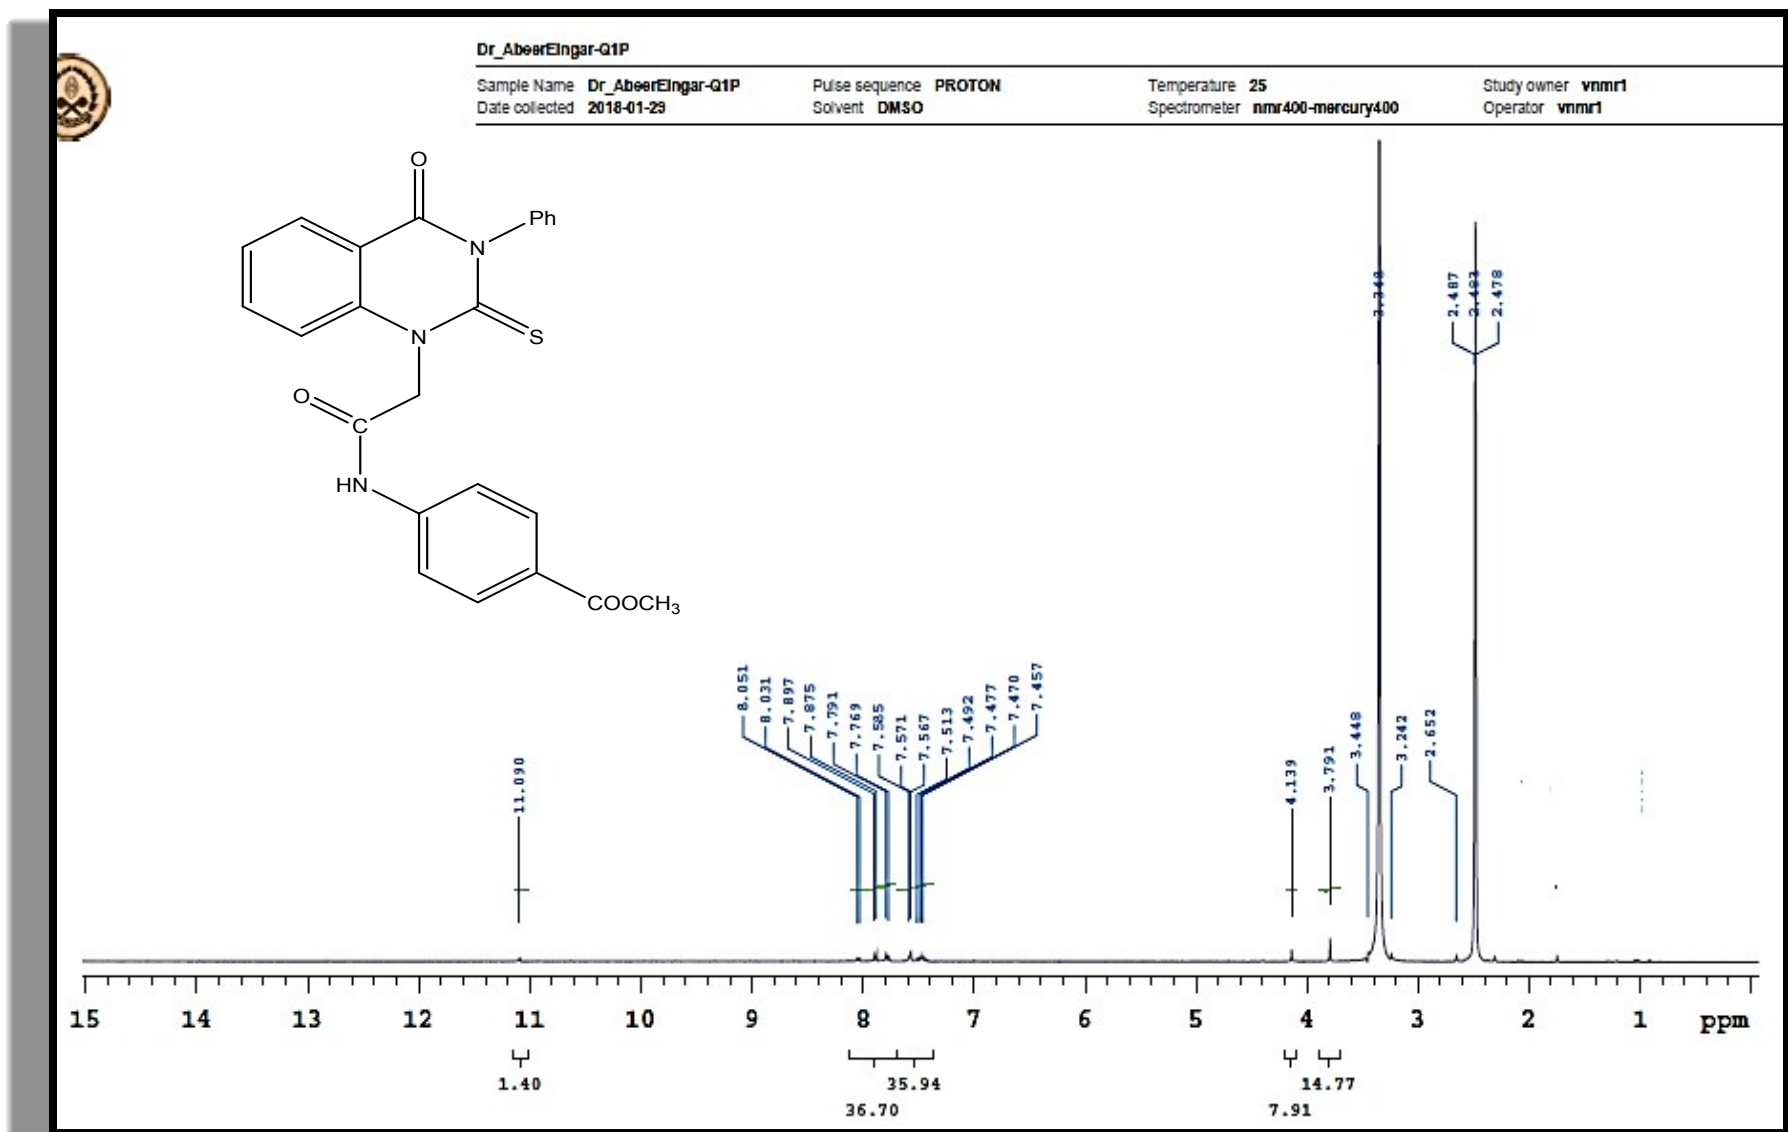

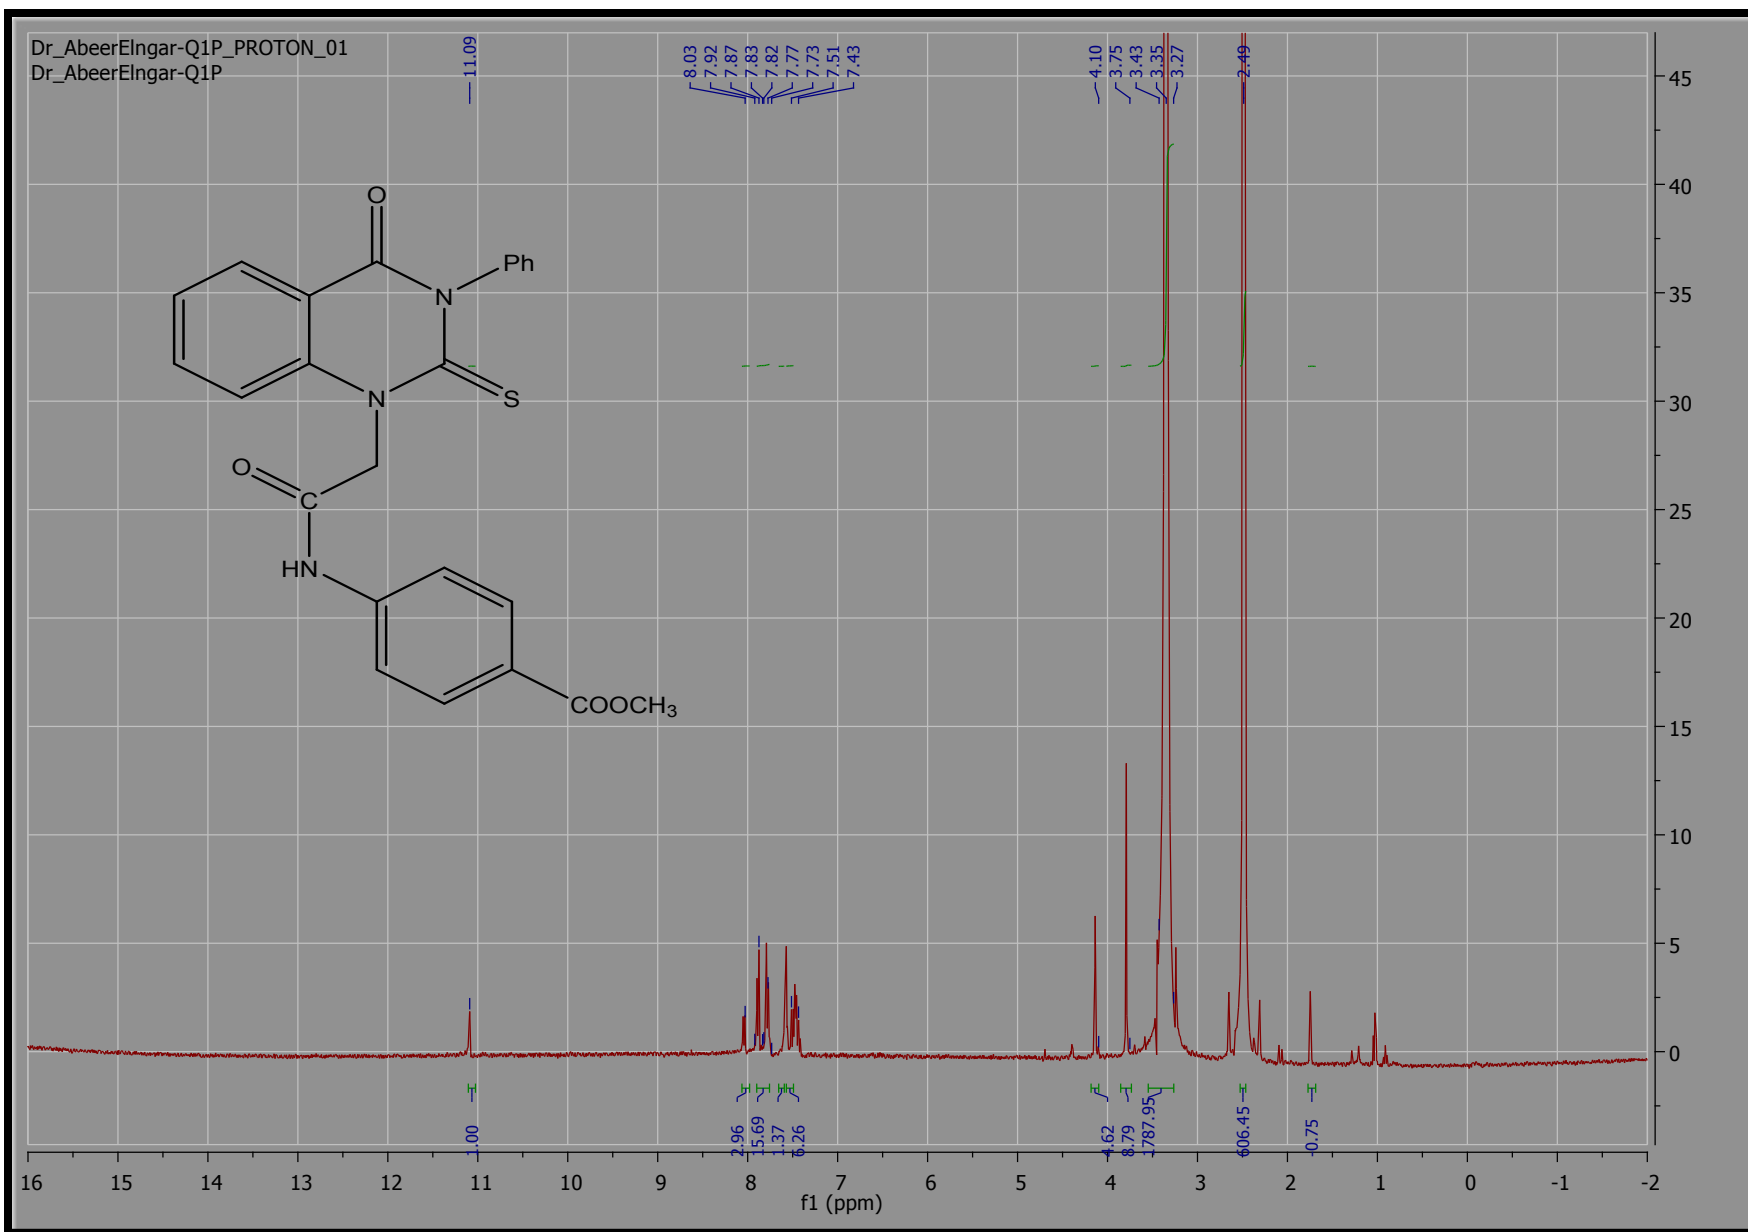

abeer-najar-Q1P

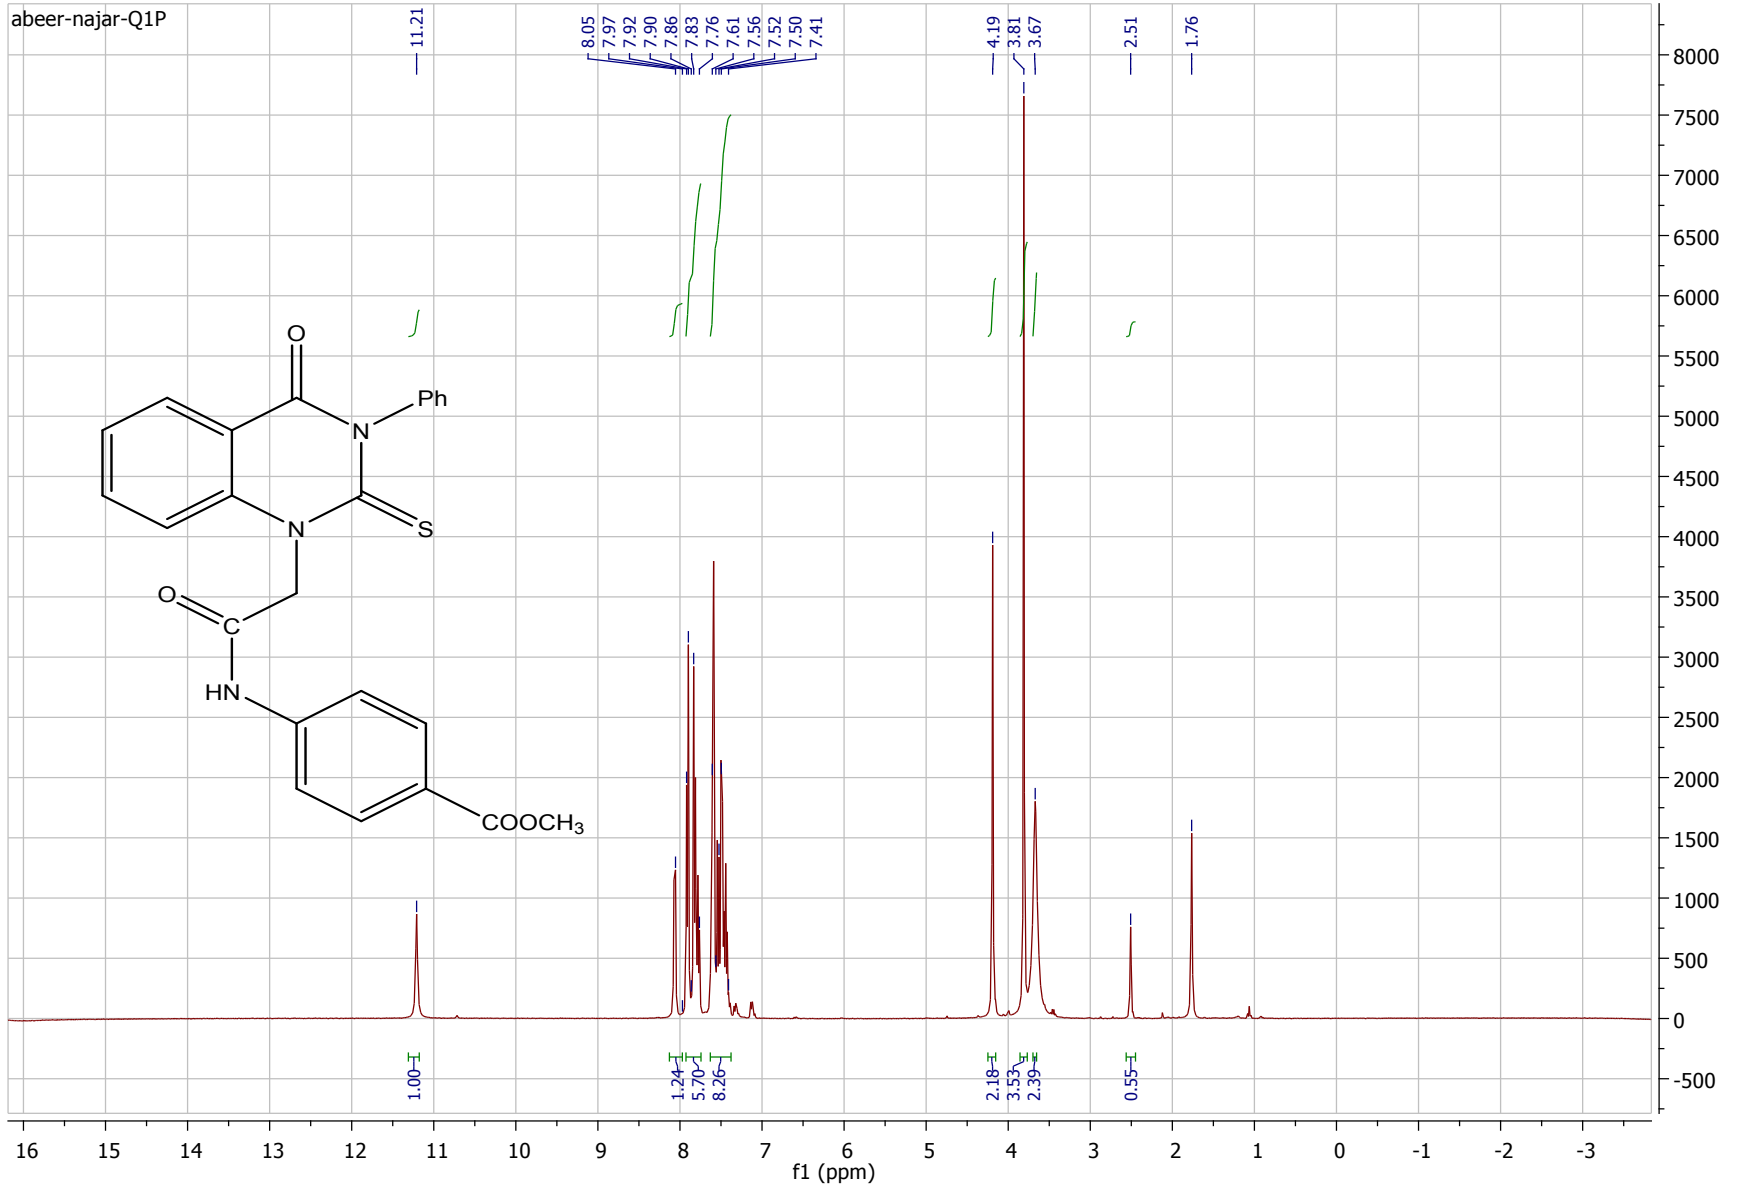

abeer-najar-Q1P

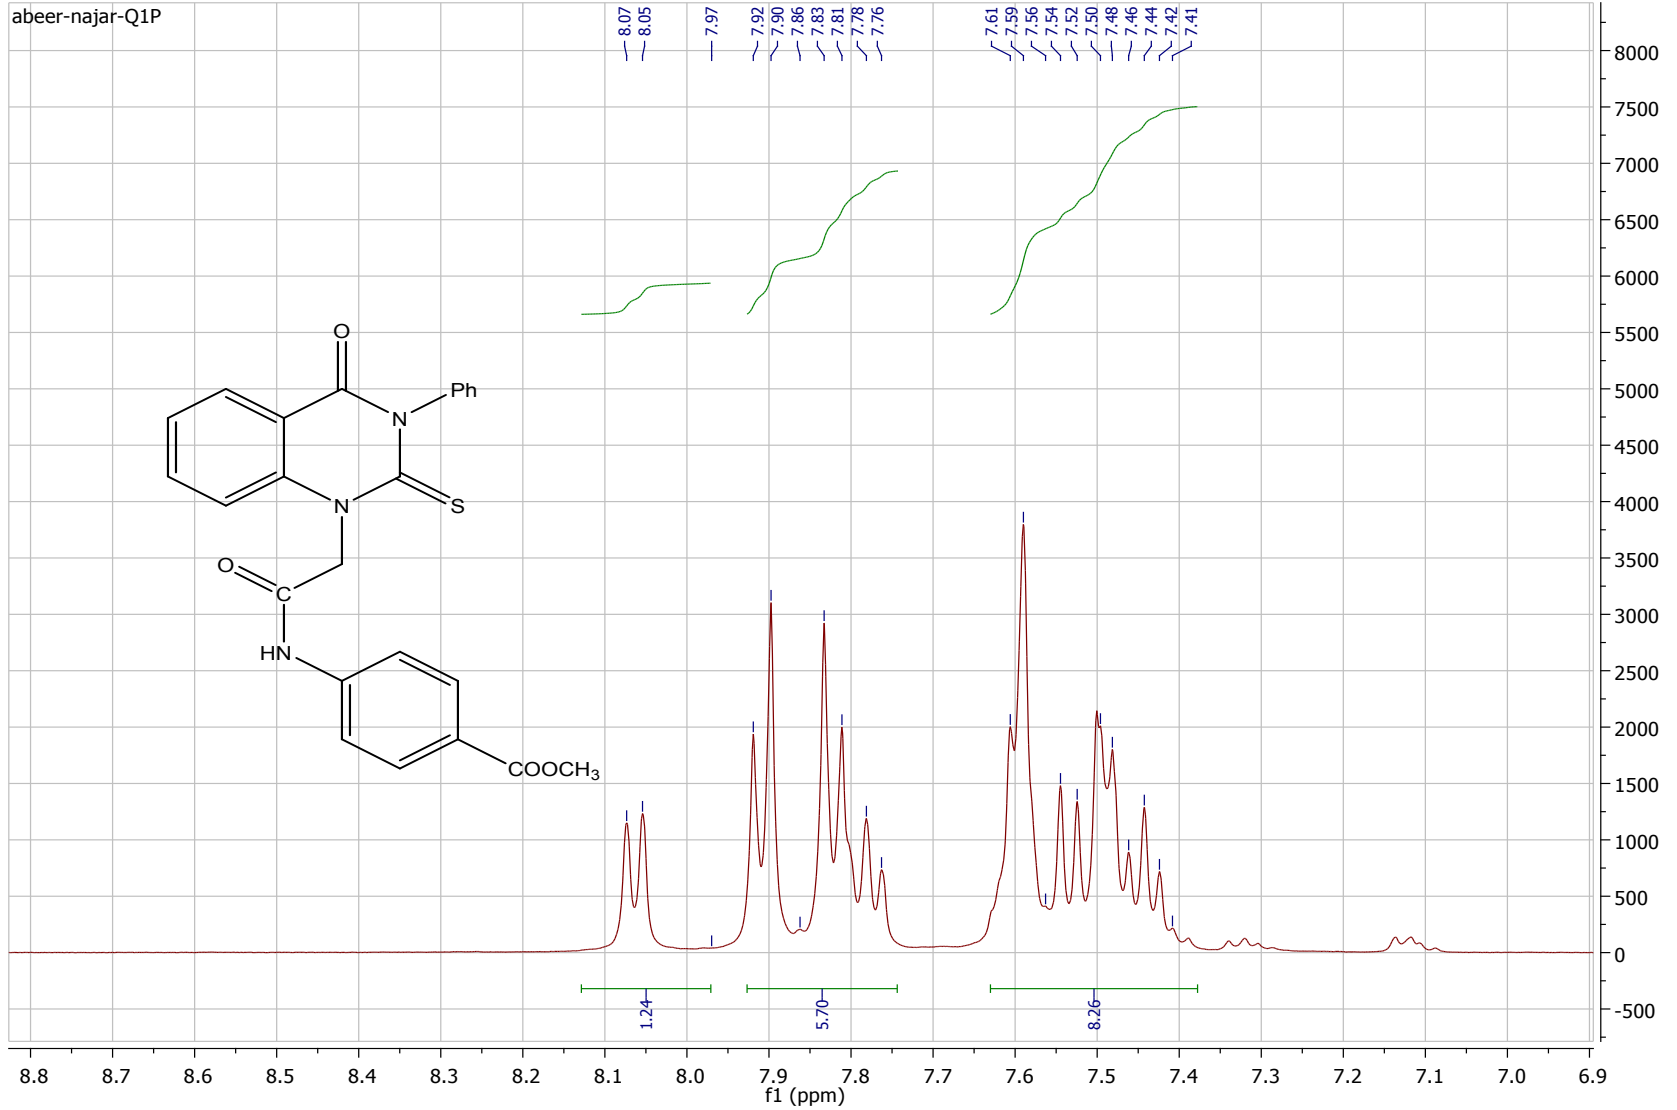

*<sup>13</sup>C NMR*



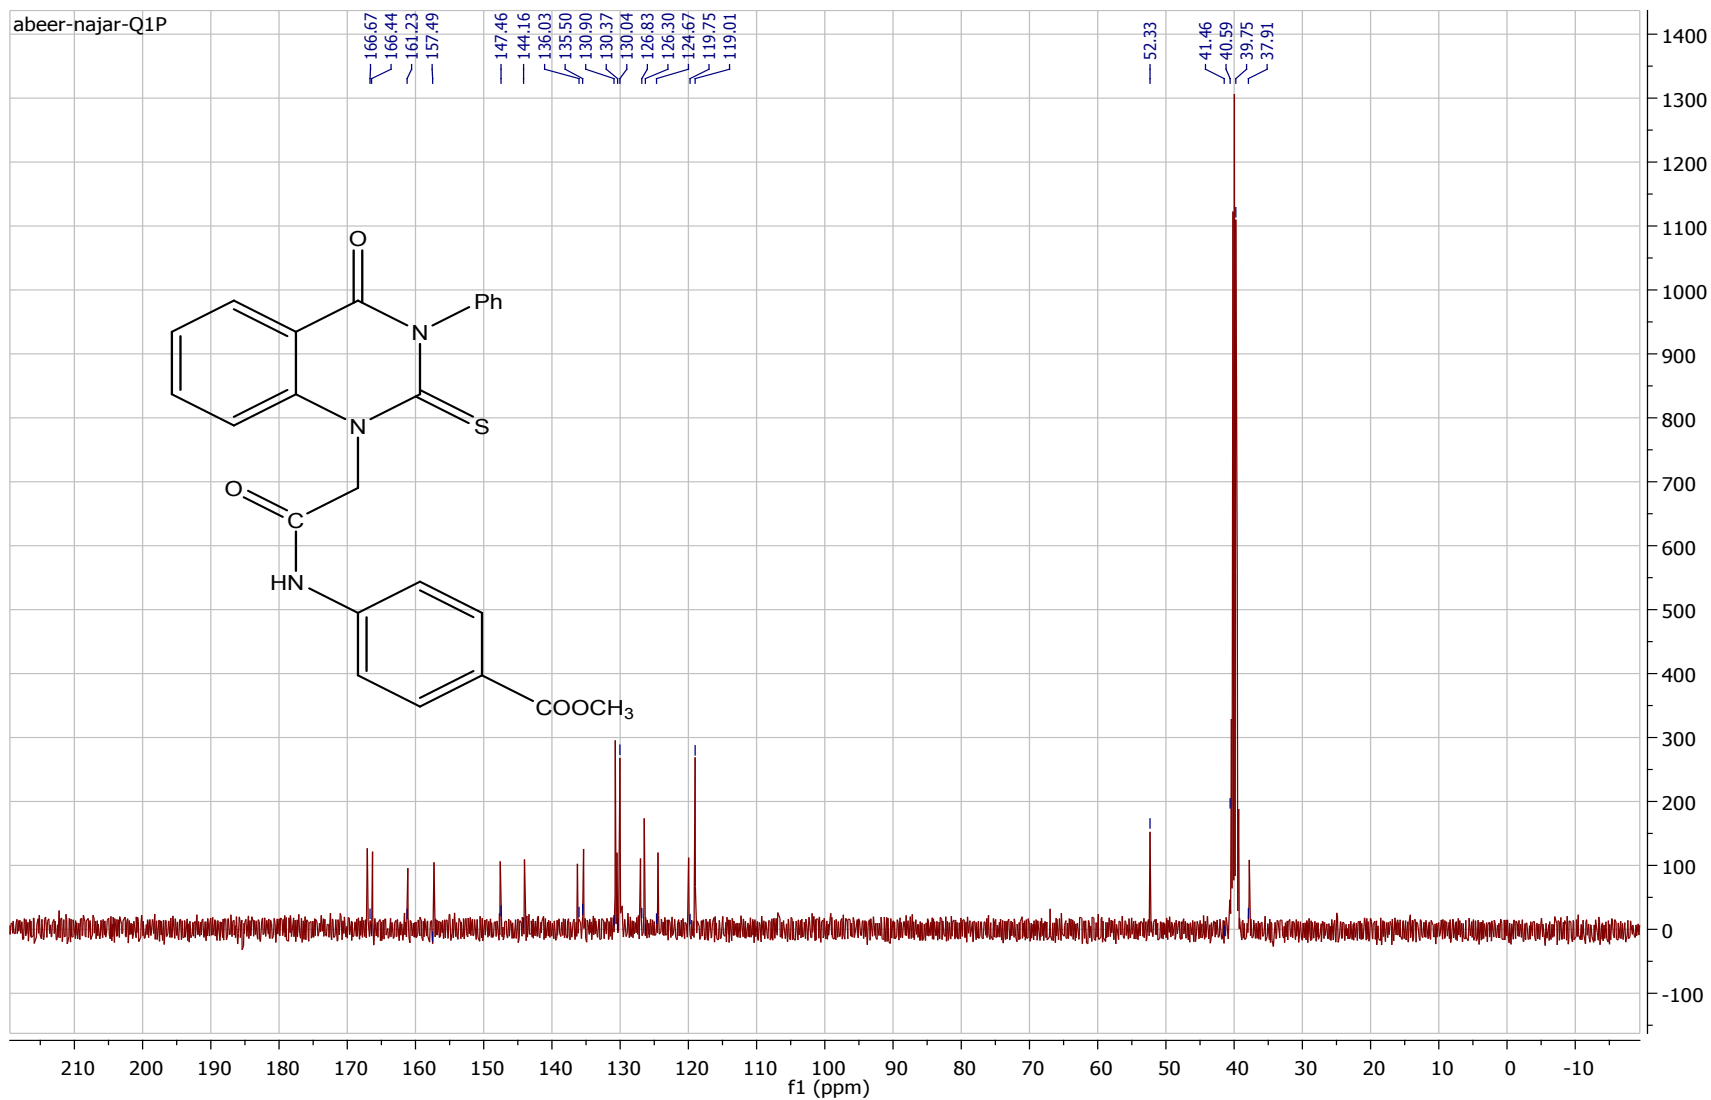

*N*-(4-acetylphenyl)-2-(4-oxo-3-phenyl-2-thioxo-3,4-dihydroquinazolin-1(2H)-yl)acetamide (6b).

# IR

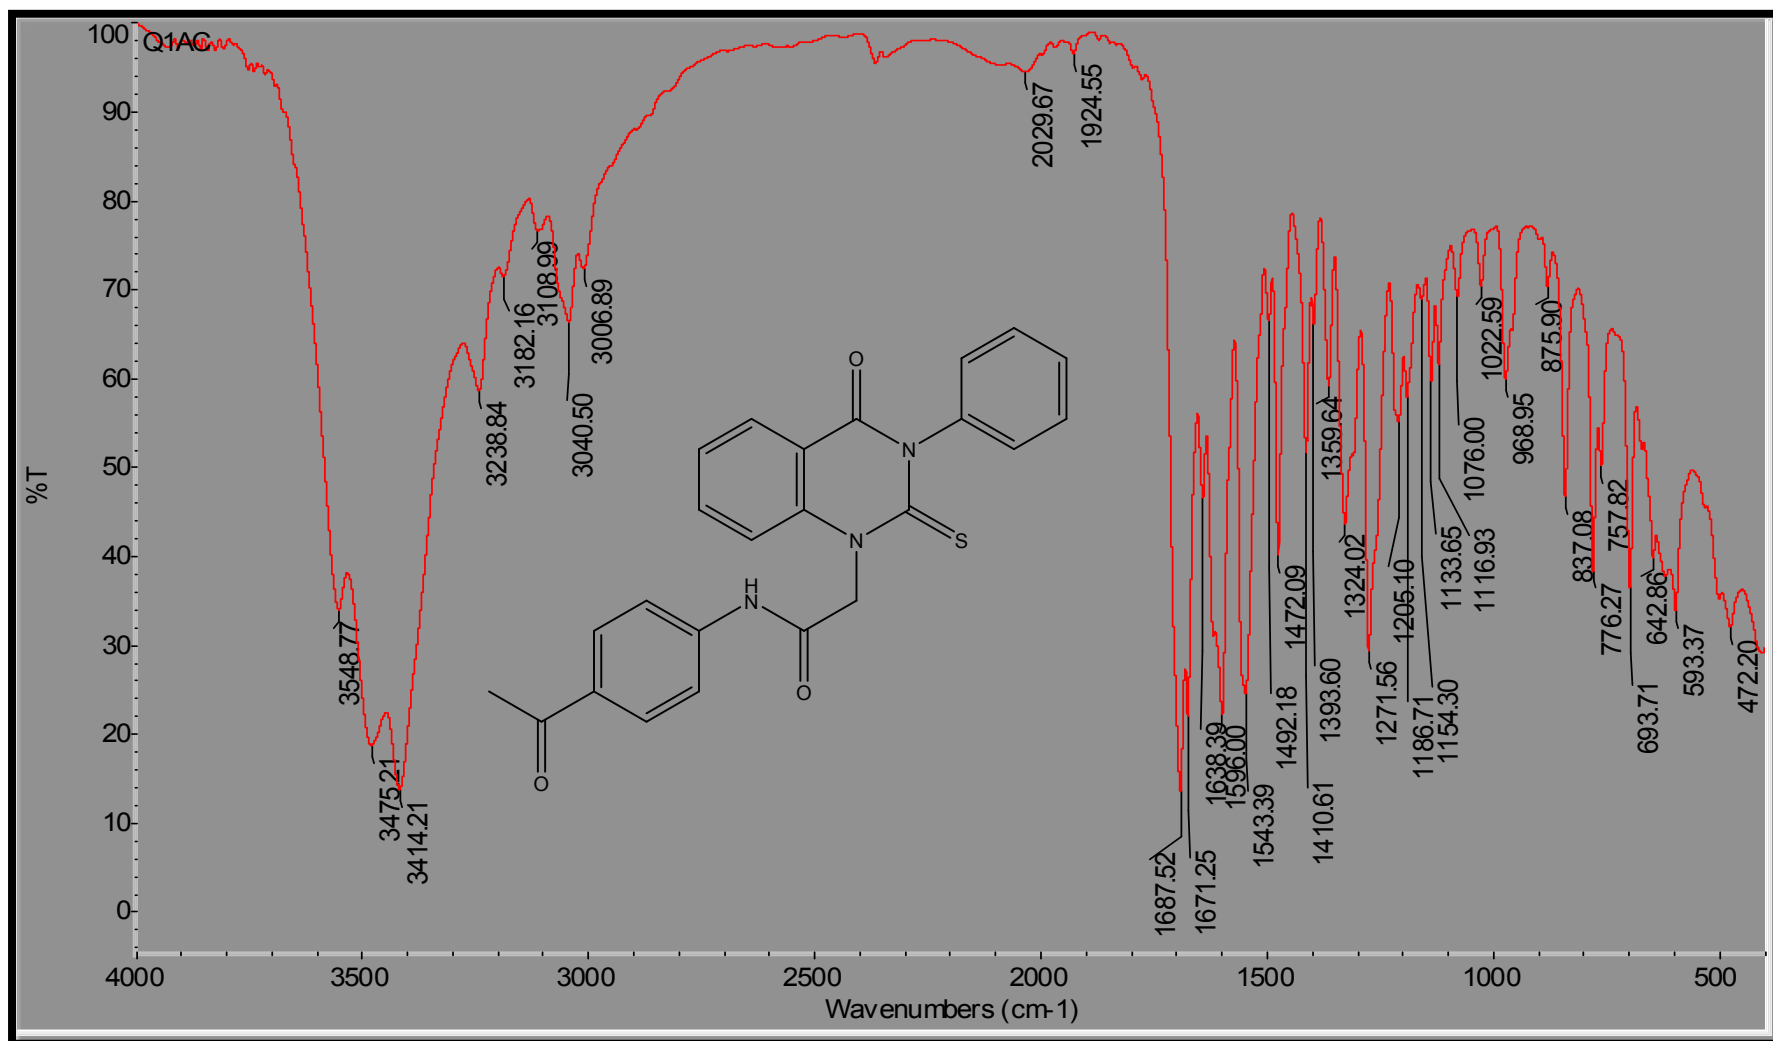

# *<sup>1</sup>HNMR*

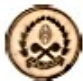

Dr\_AbeerElnagar-q1AC

Dr\_AbeerElnagar-q1AC

Sample Name Dr\_AbeerElnagar-q1AC  
Date collected 2018-03-25

Pulse sequence PROTON  
Solvent DMSO

Temperature 25  
Spectrometer nmr400-mercury400

Laboratory MODCL  
NMR User sameeh\_Albadowy

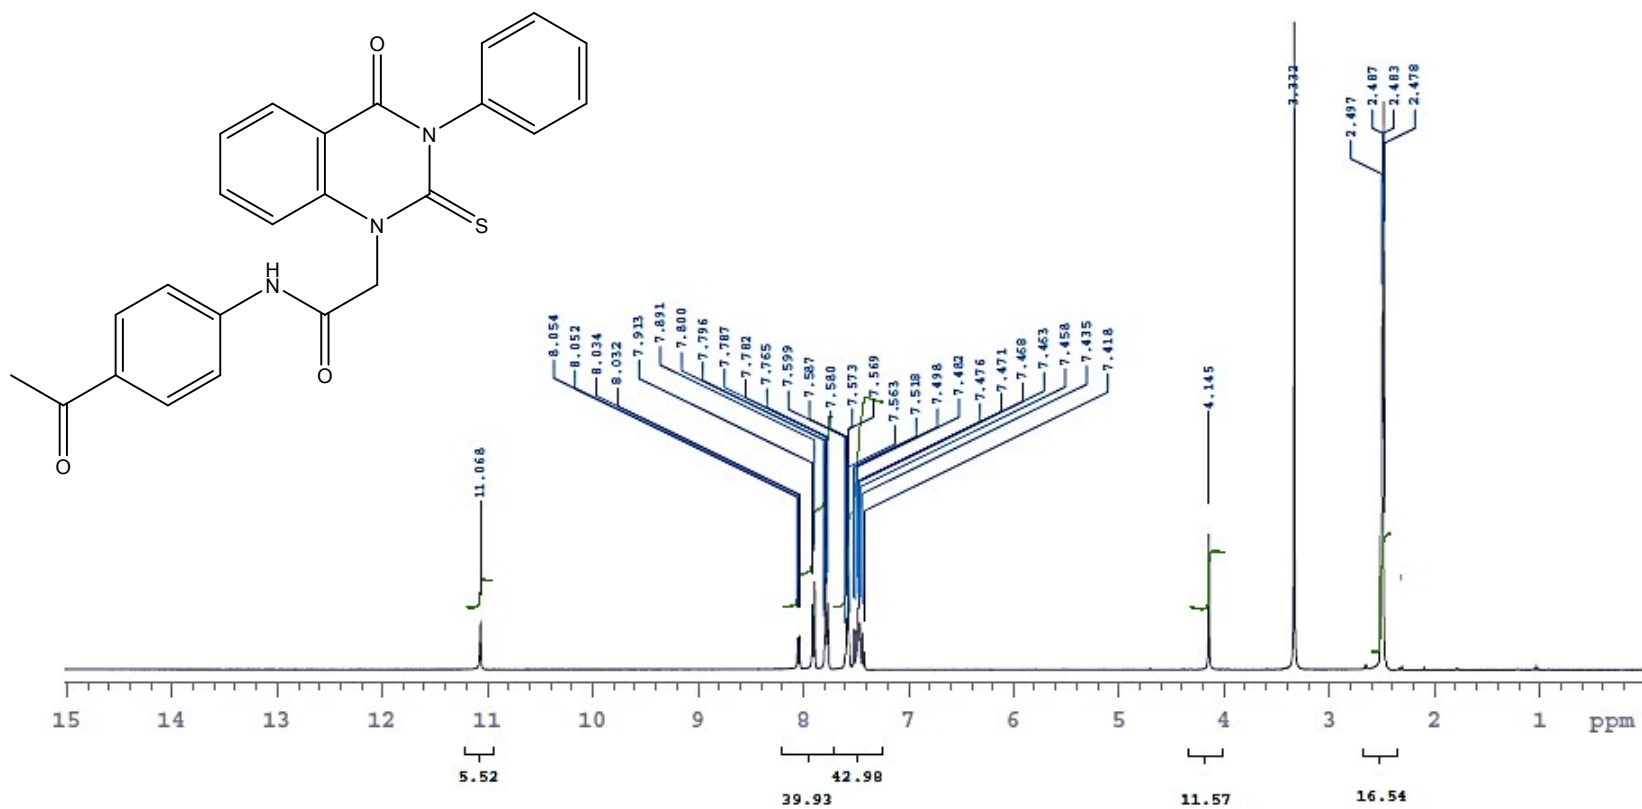

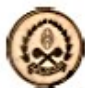

Dr\_AbeerElmagar-q1AC-D2O

Dr\_AbeerElmagar-q1AC-D2O

Sample Name **Dr\_AbeerElmagar-q1AC-D2O** Pulse sequence **PROTON**  
Date collected **2018-03-26** Solvent **DMSO**

Temperature **25**  
Spectrometer **nmr400-mercury400**

Laboratory **MODCL**  
NMR User **sameeh\_Albadauy**

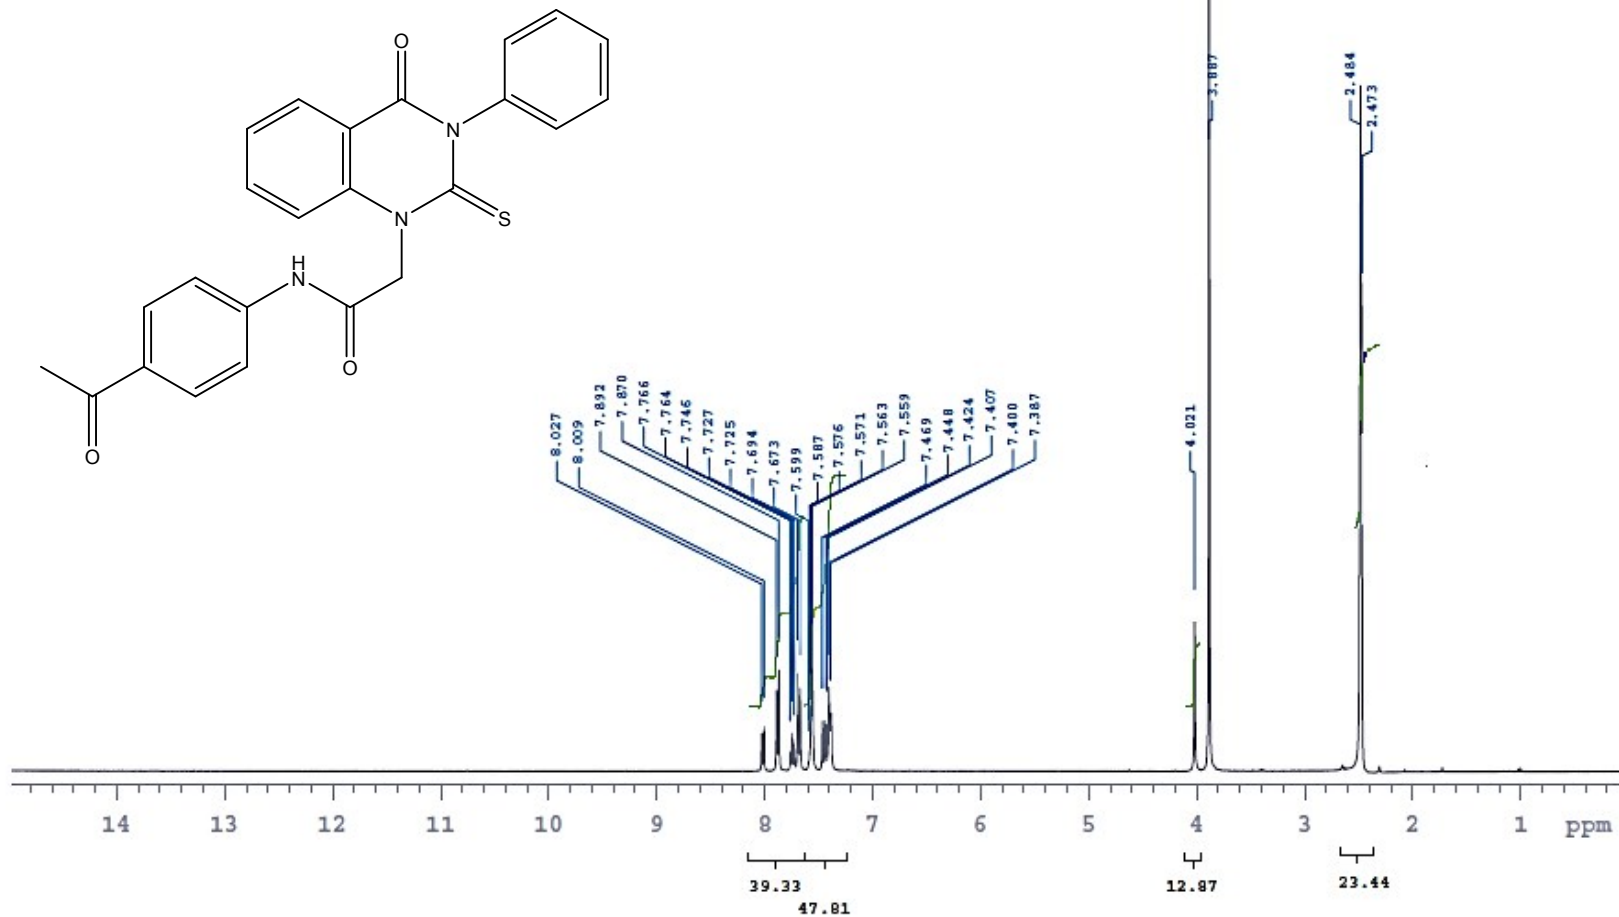

abeer-najar-Q1AC2

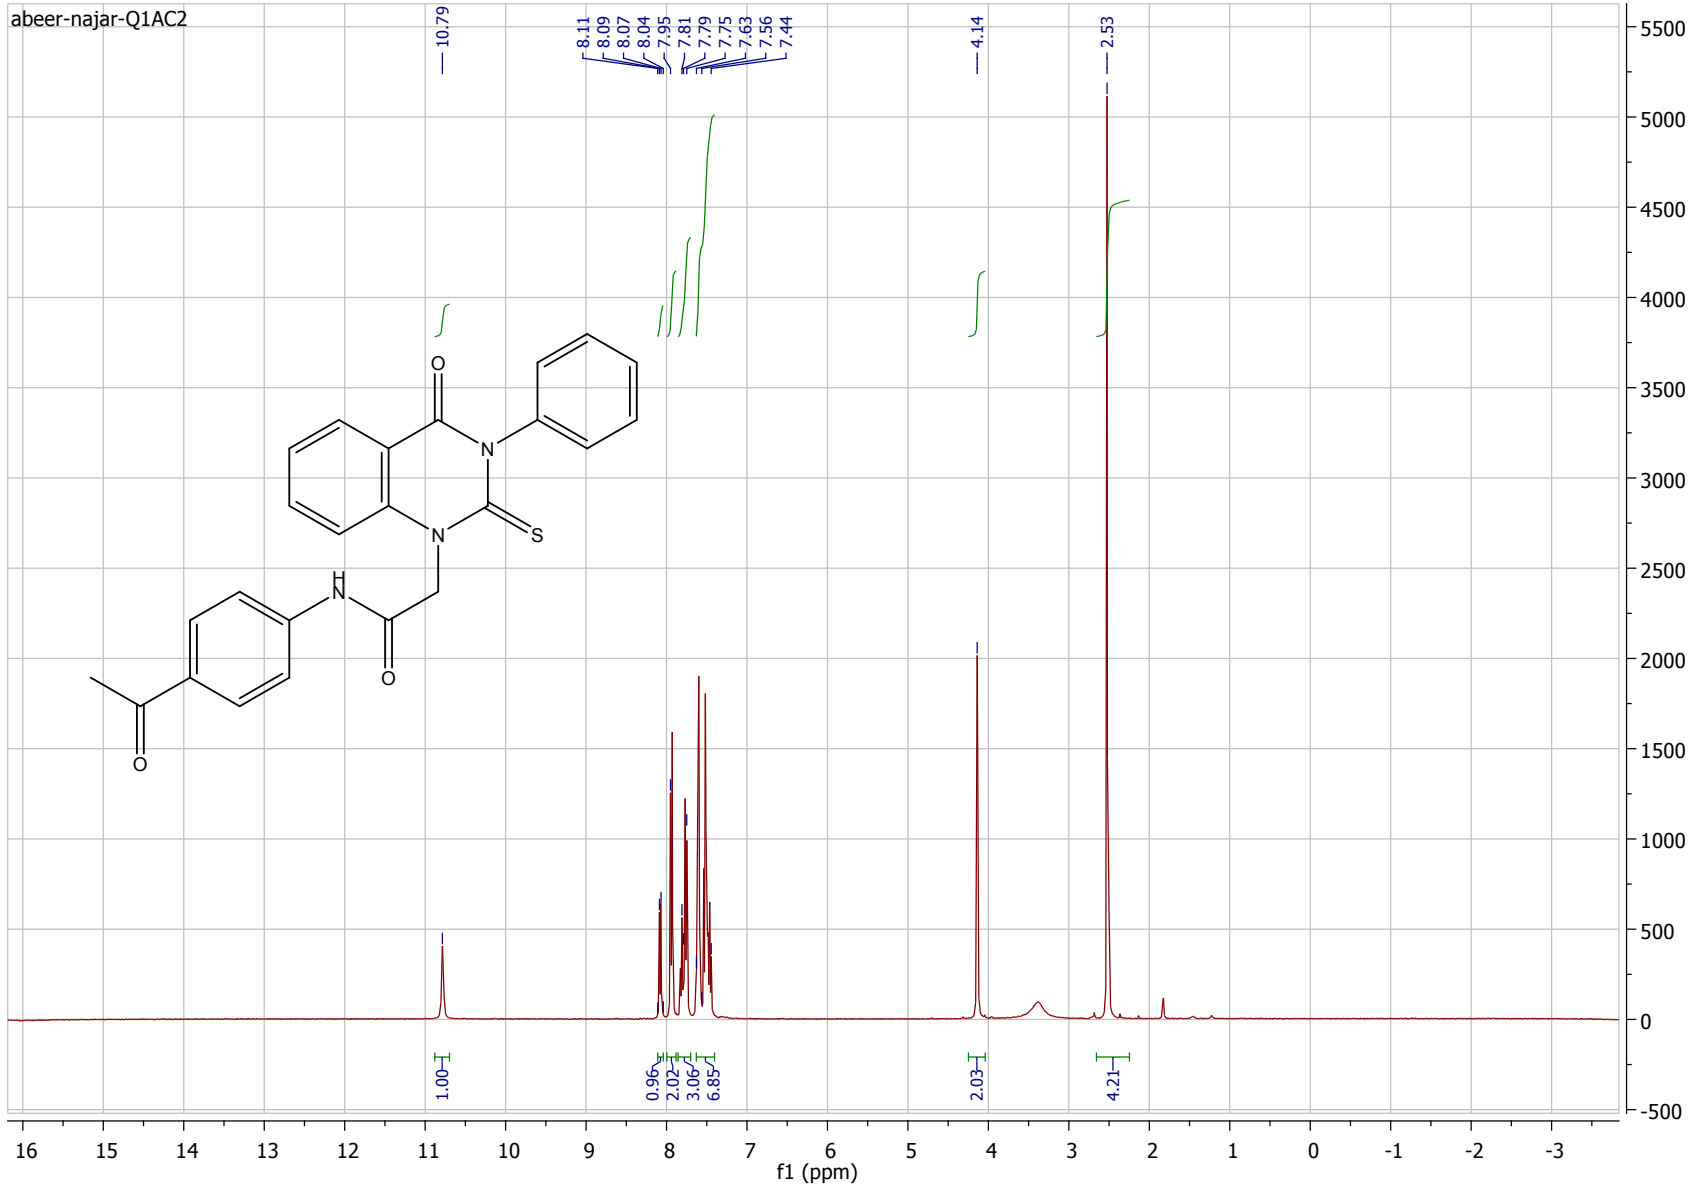

abeer-najar-Q1AC2

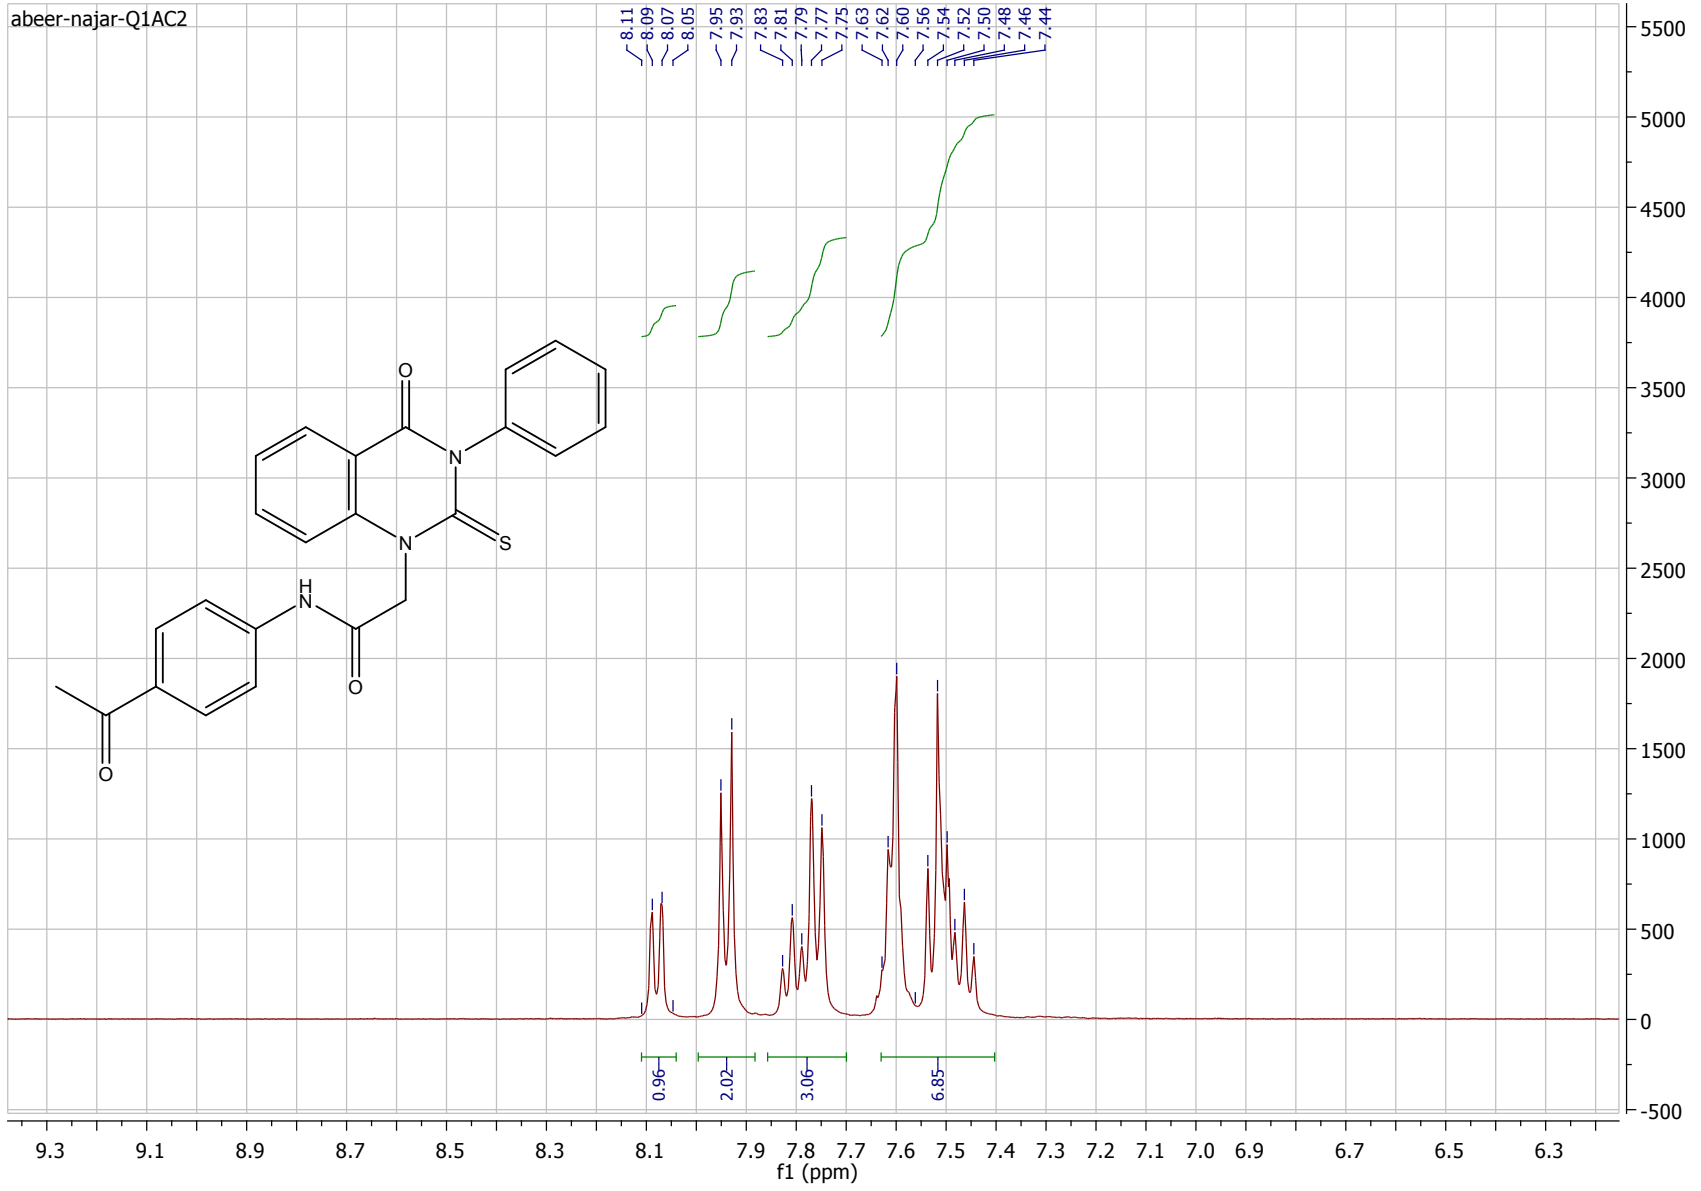

<sup>13</sup>C NMR

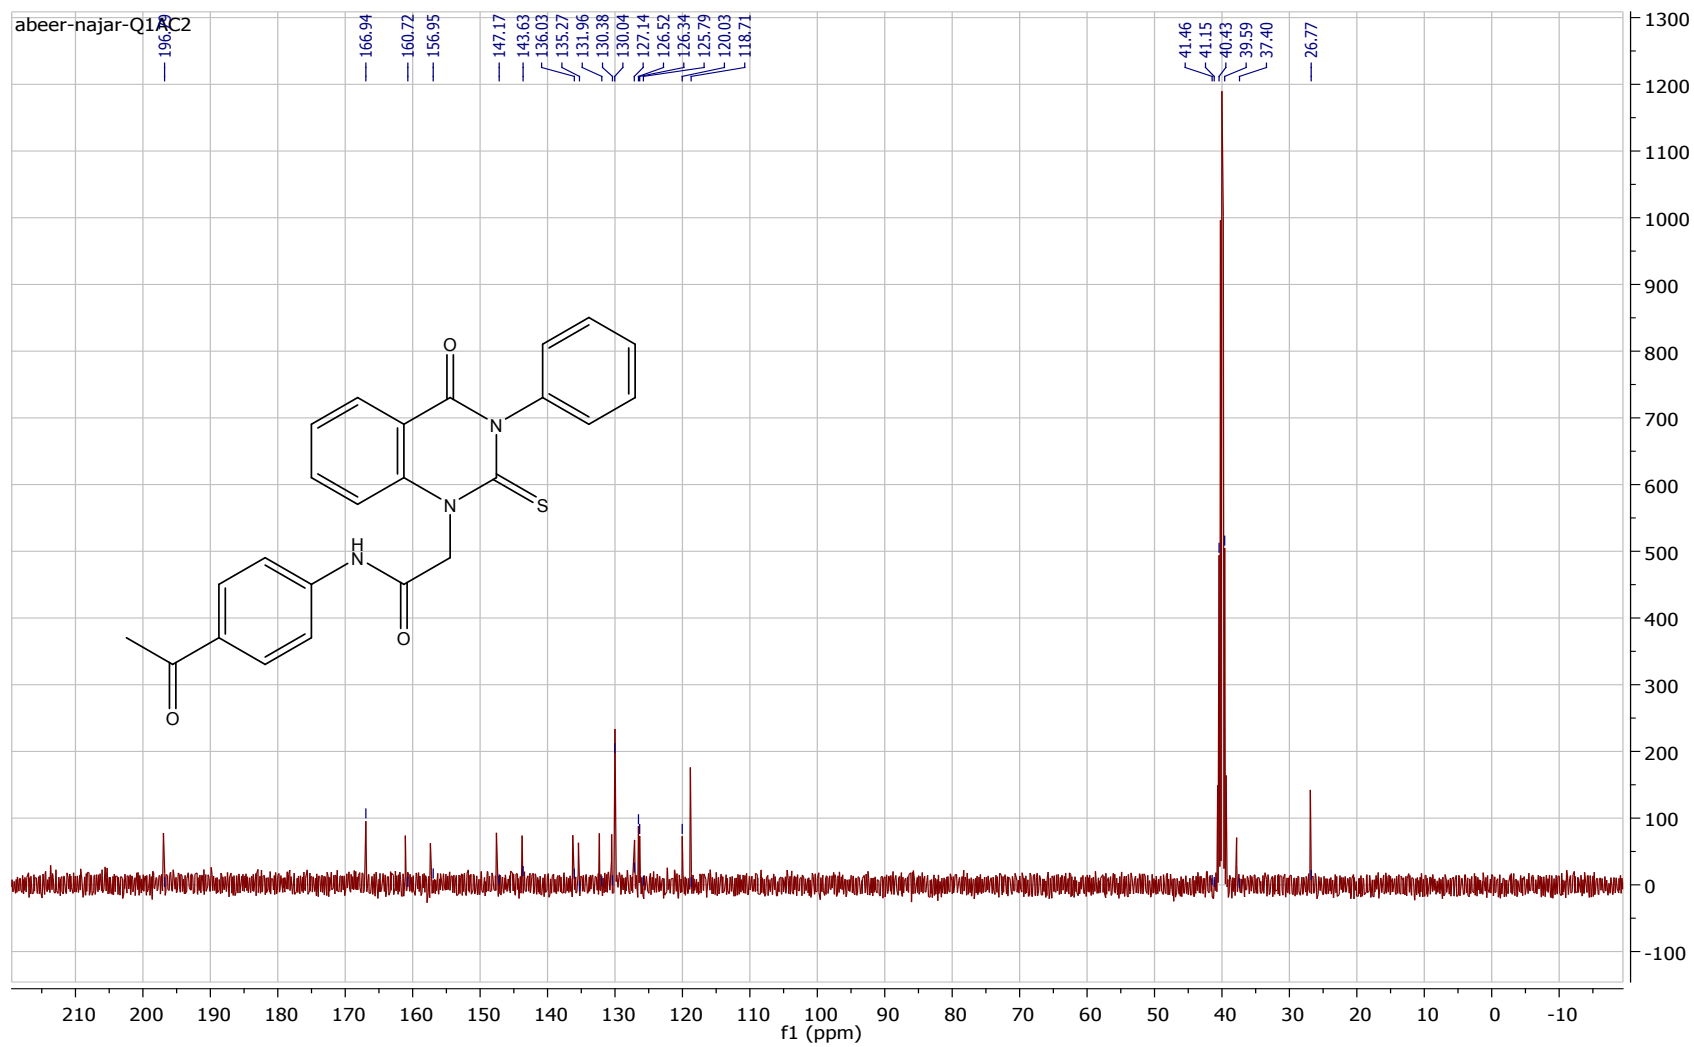

*2-(4-Oxo-3-phenyl-2-thioxo-3,4-dihydroquinazolin-1(2H)-yl)-N-(4-sulfamoylphenyl) acetamide (6c).*

IR

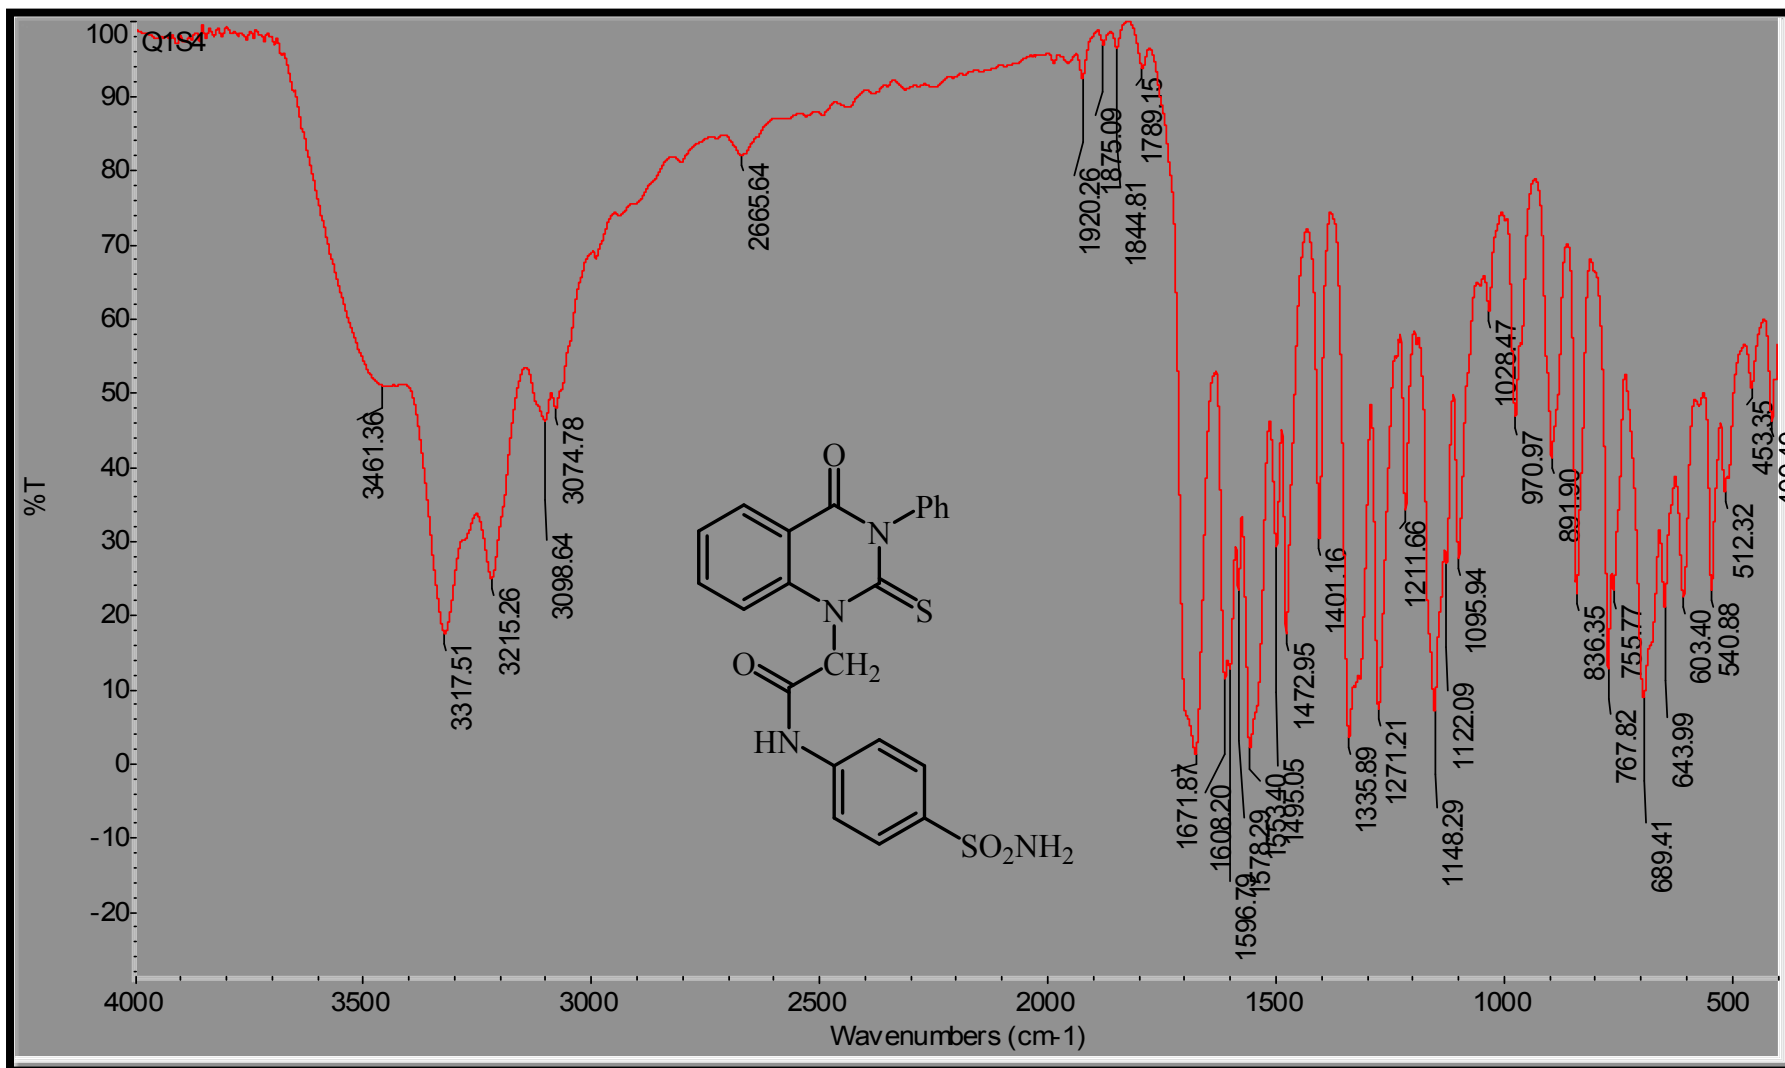



HNMR

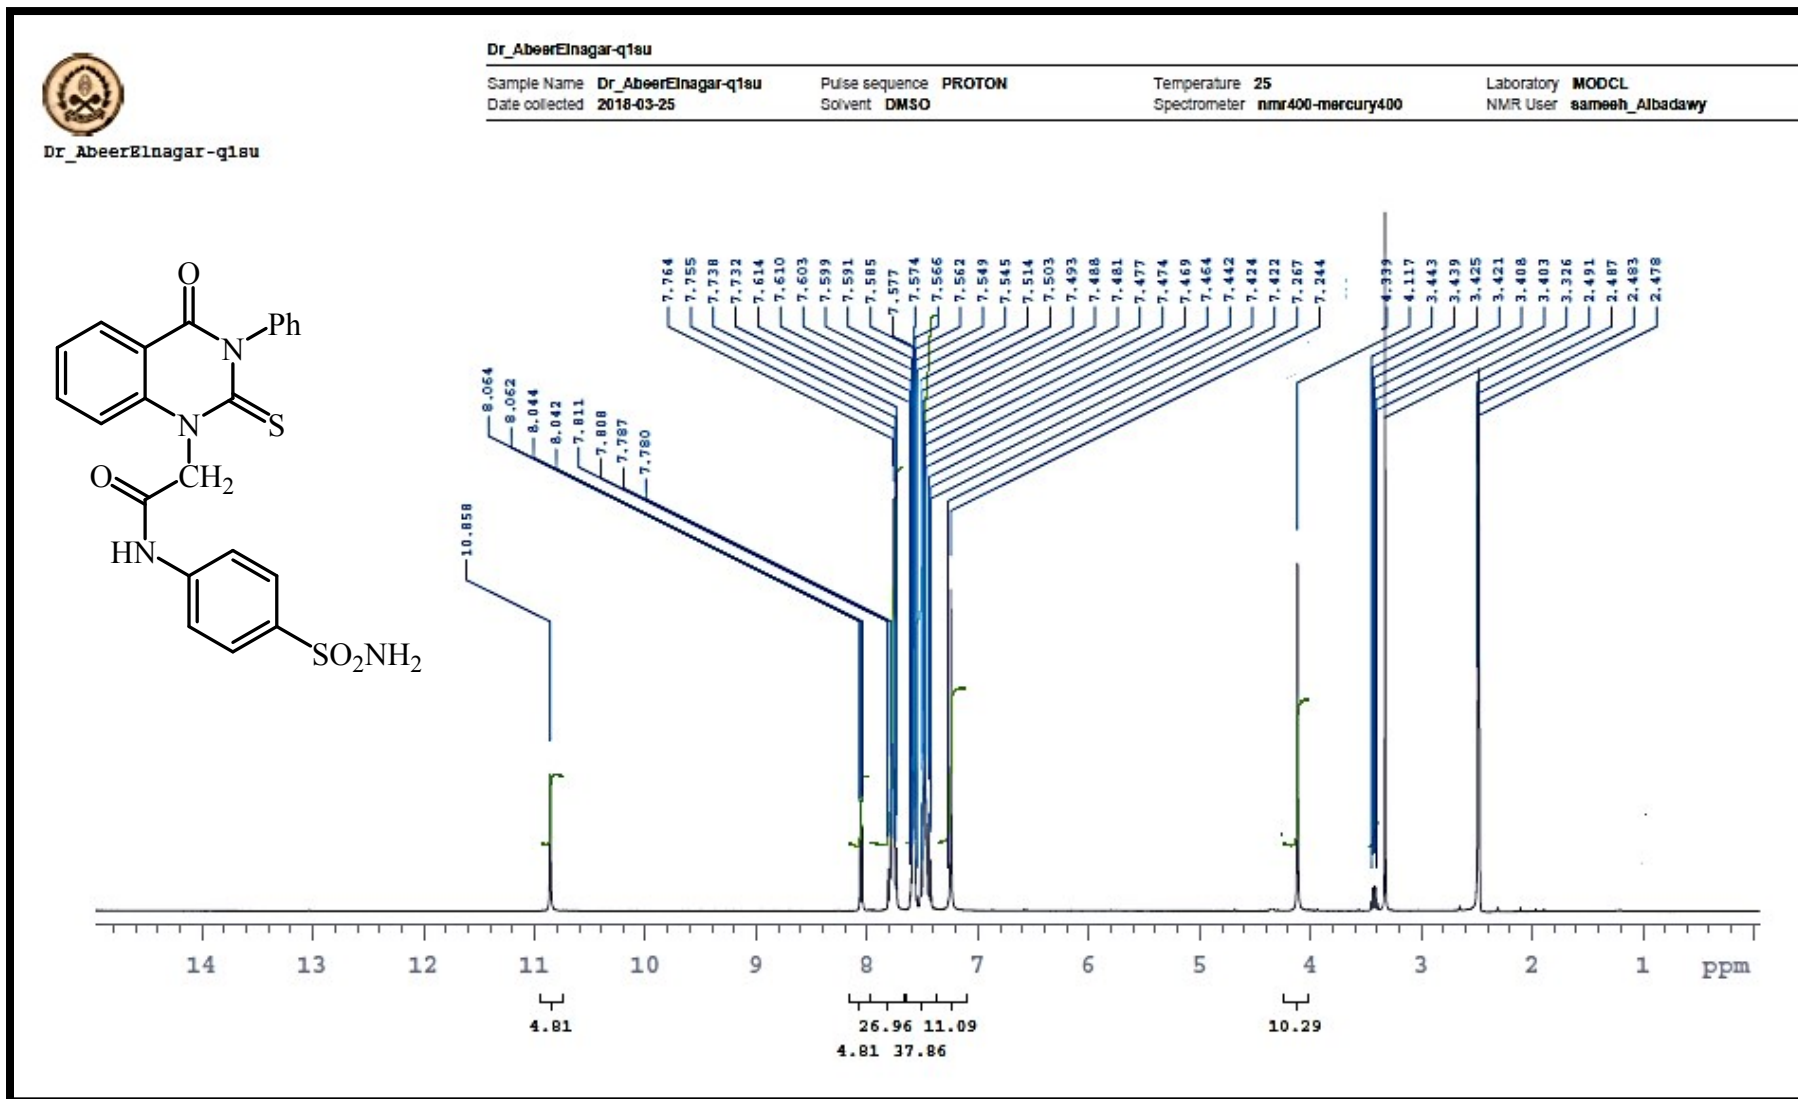

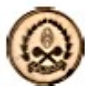

Dr\_AbeerElnagar-q1su

Dr\_AbeerElnagar-q1su

Sample Name Dr\_AbeerElnagar-q1su  
Date collected 2018-03-25

Pulse sequence PROTON  
Solvent DMSO

Temperature 25  
Spectrometer nmr400-mercury400

Laboratory MODCL  
NMR User sameeh\_Albadawy

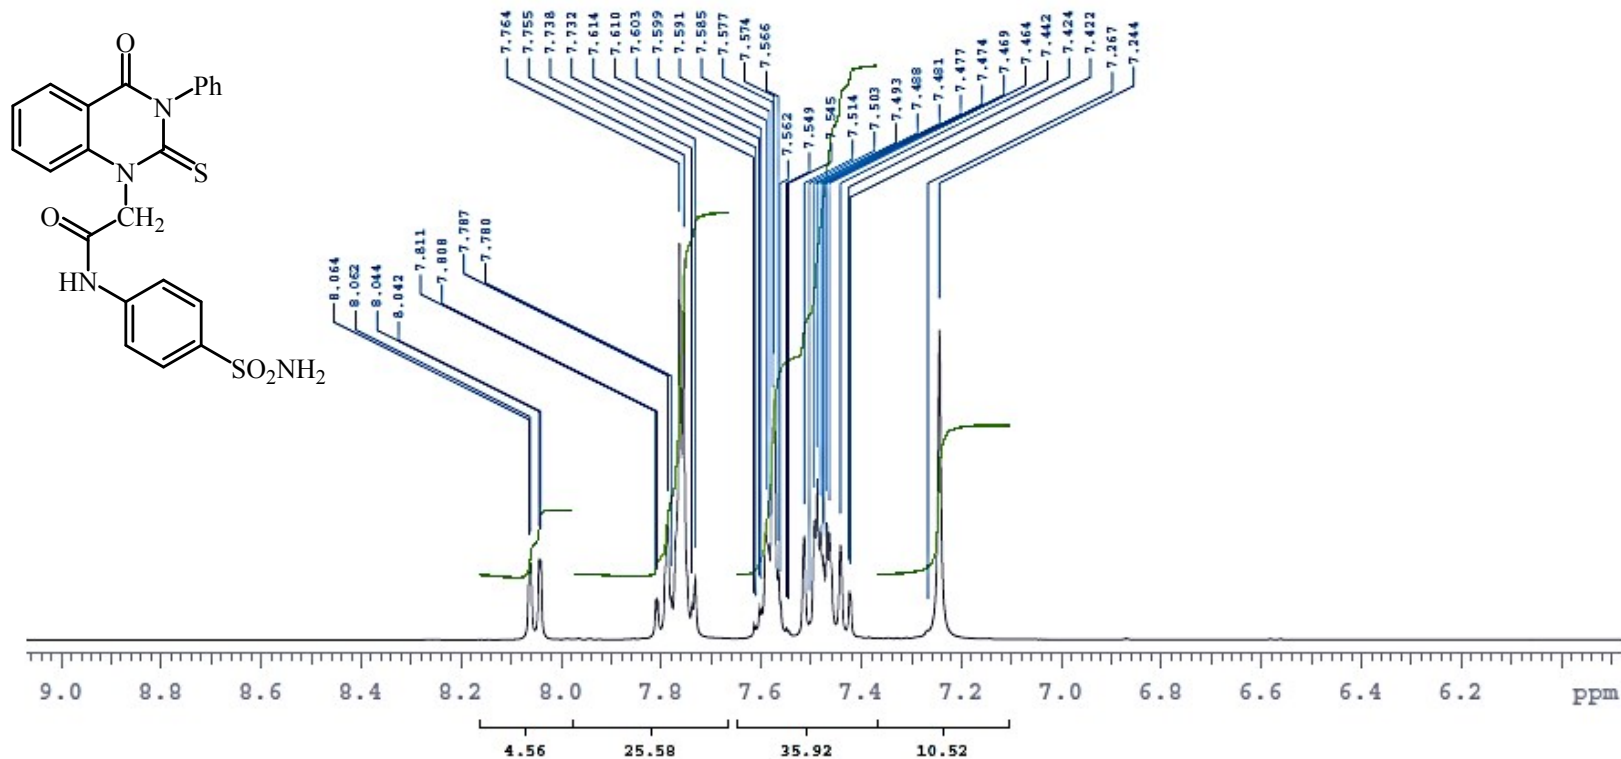

2-((4-oxo-3-phenyl-3,4-dihydroquinazolin-2-yl)thio)-N-(4-(N-(phenylcarbamoyl) sulfamoyl) phenyl)acetamide (7a).

**HNMR**

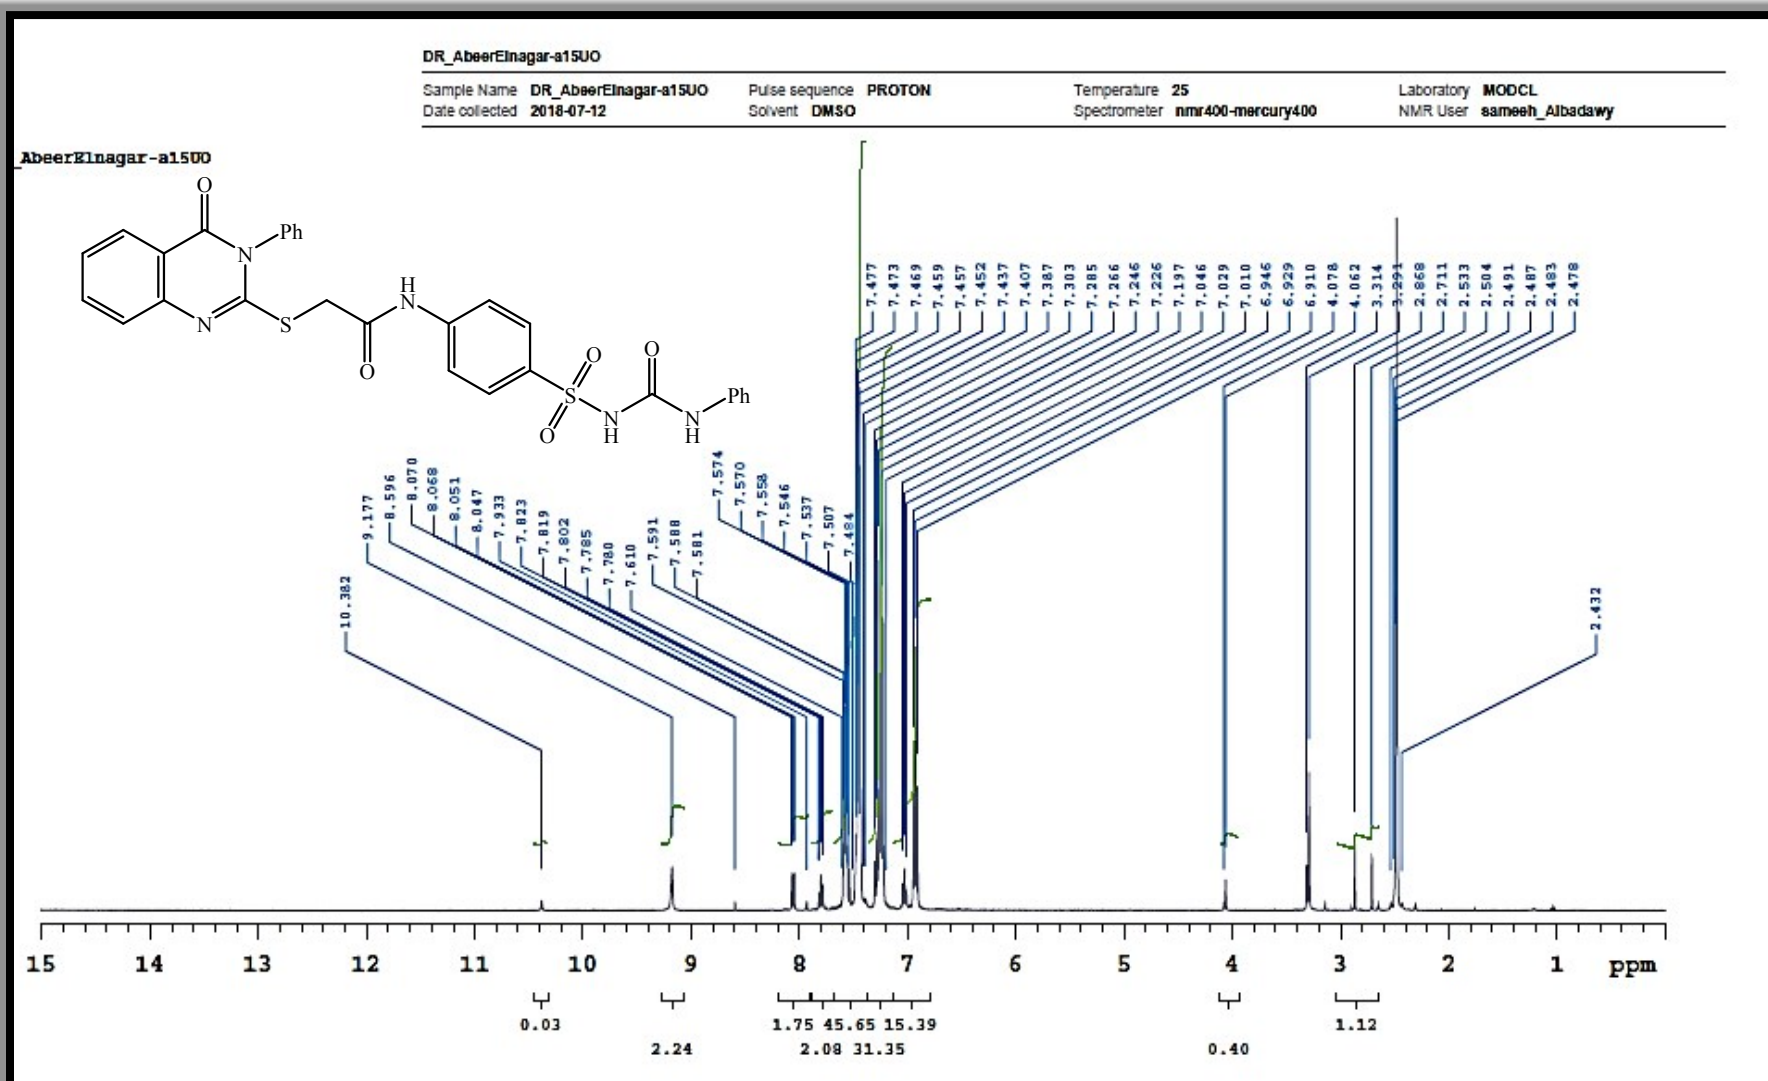

DR\_AbeerElnagar-a15UO\_PROTON\_01  
DR\_AbeerElnagar-a15UO

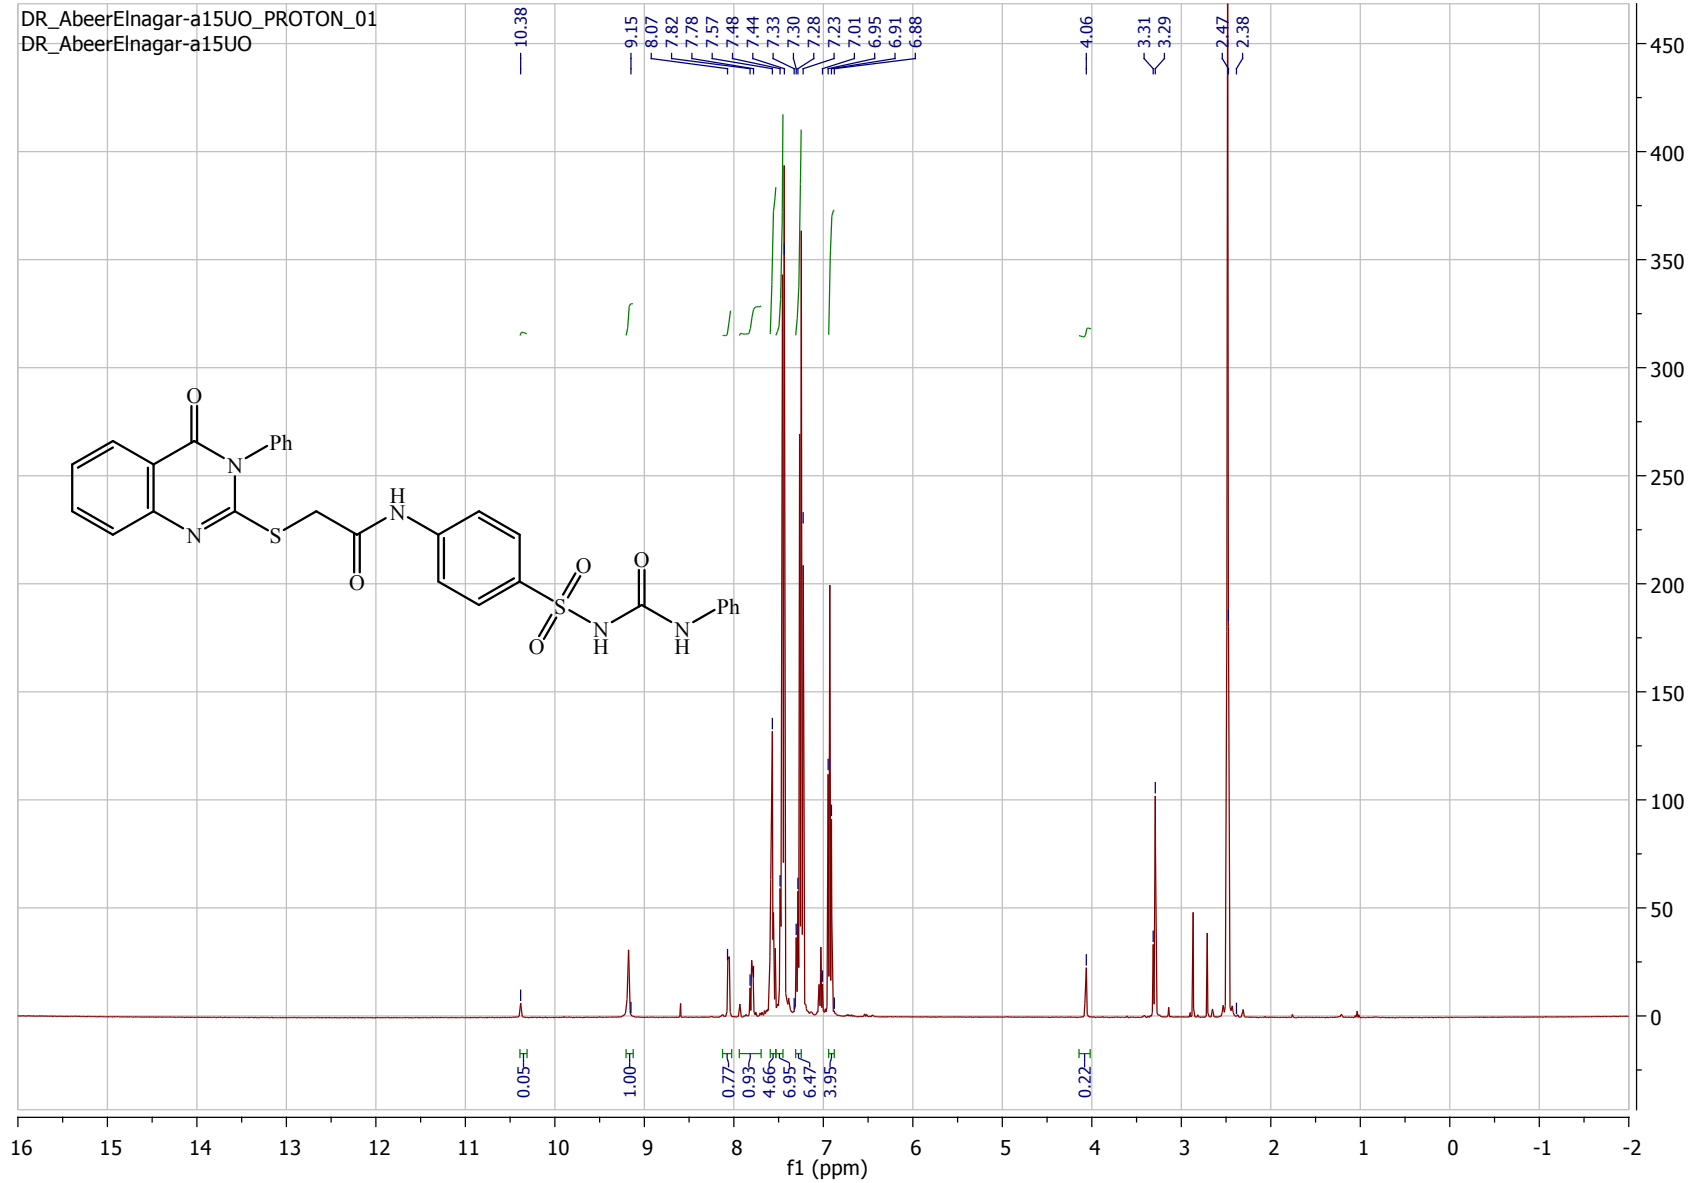

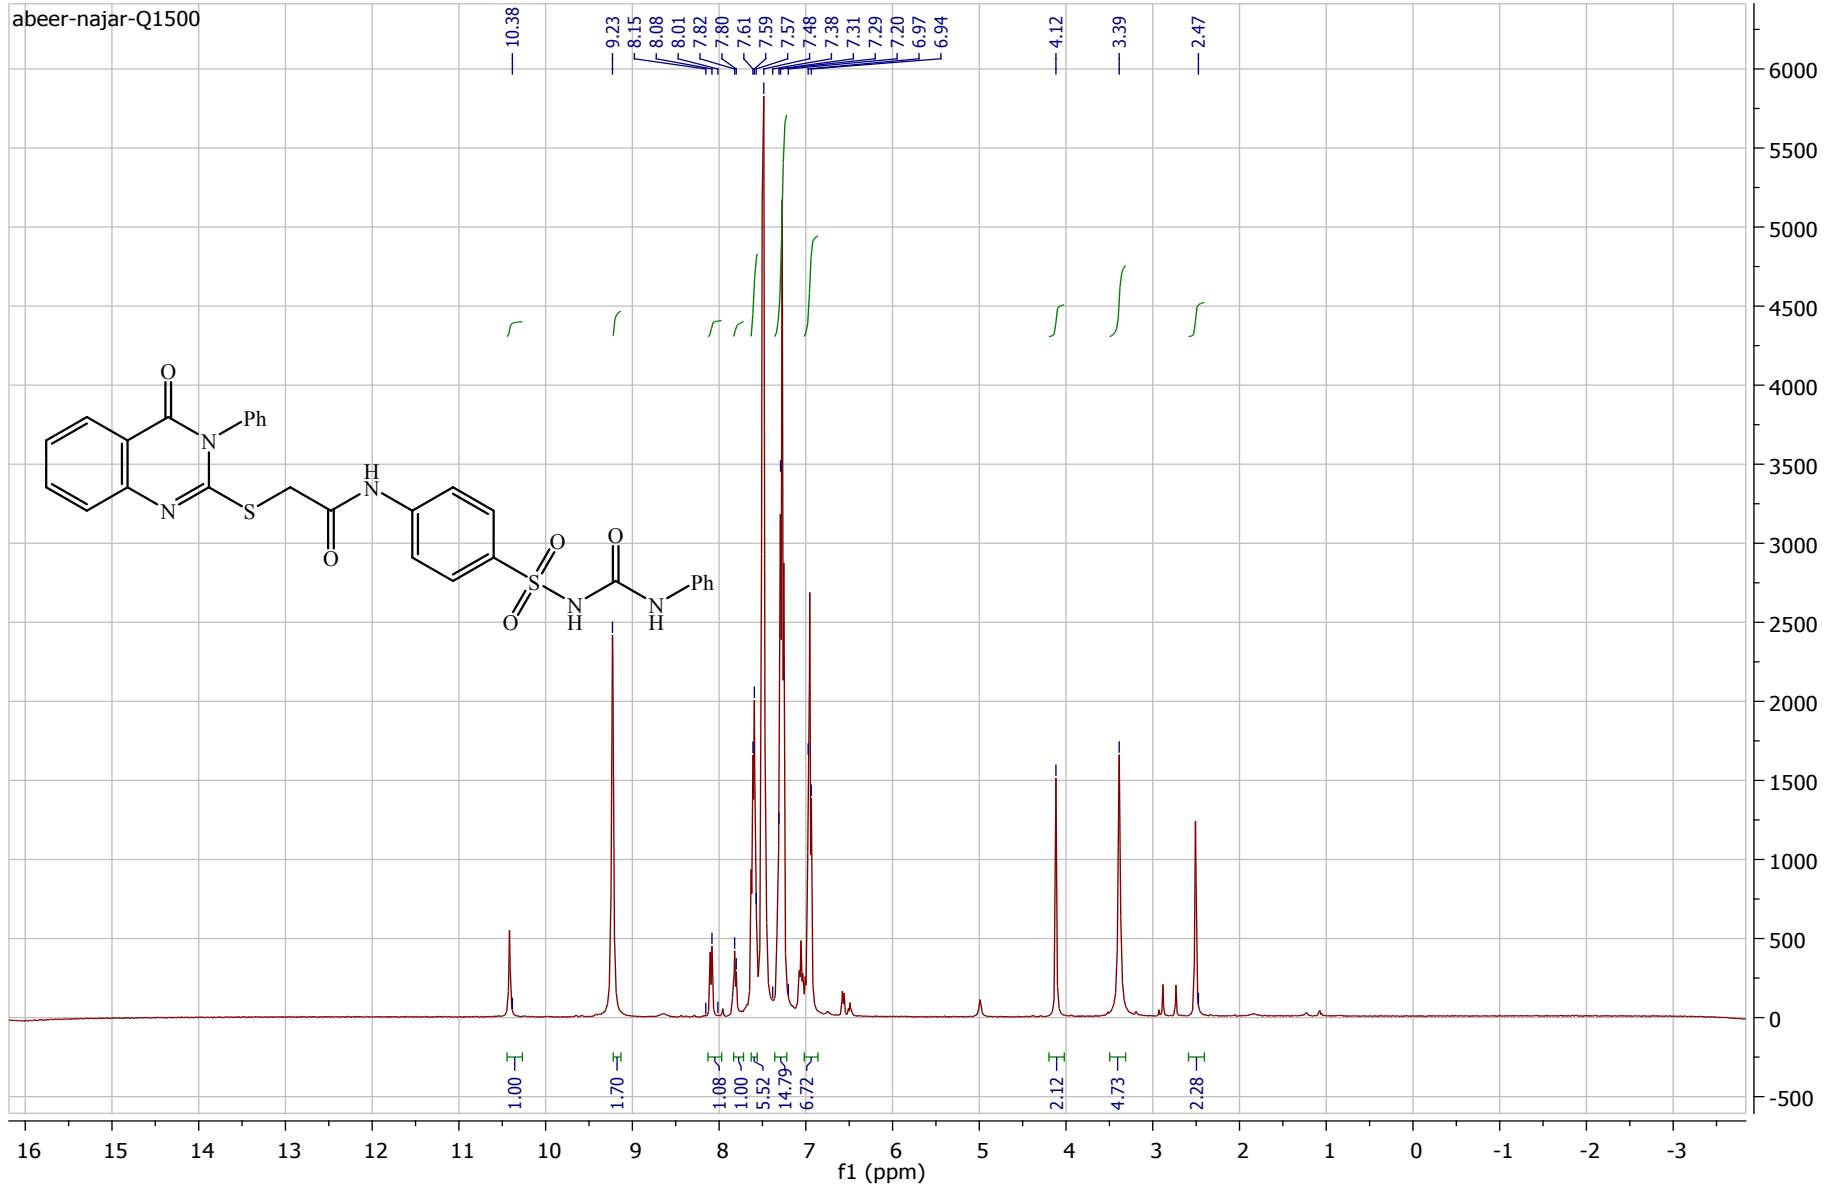

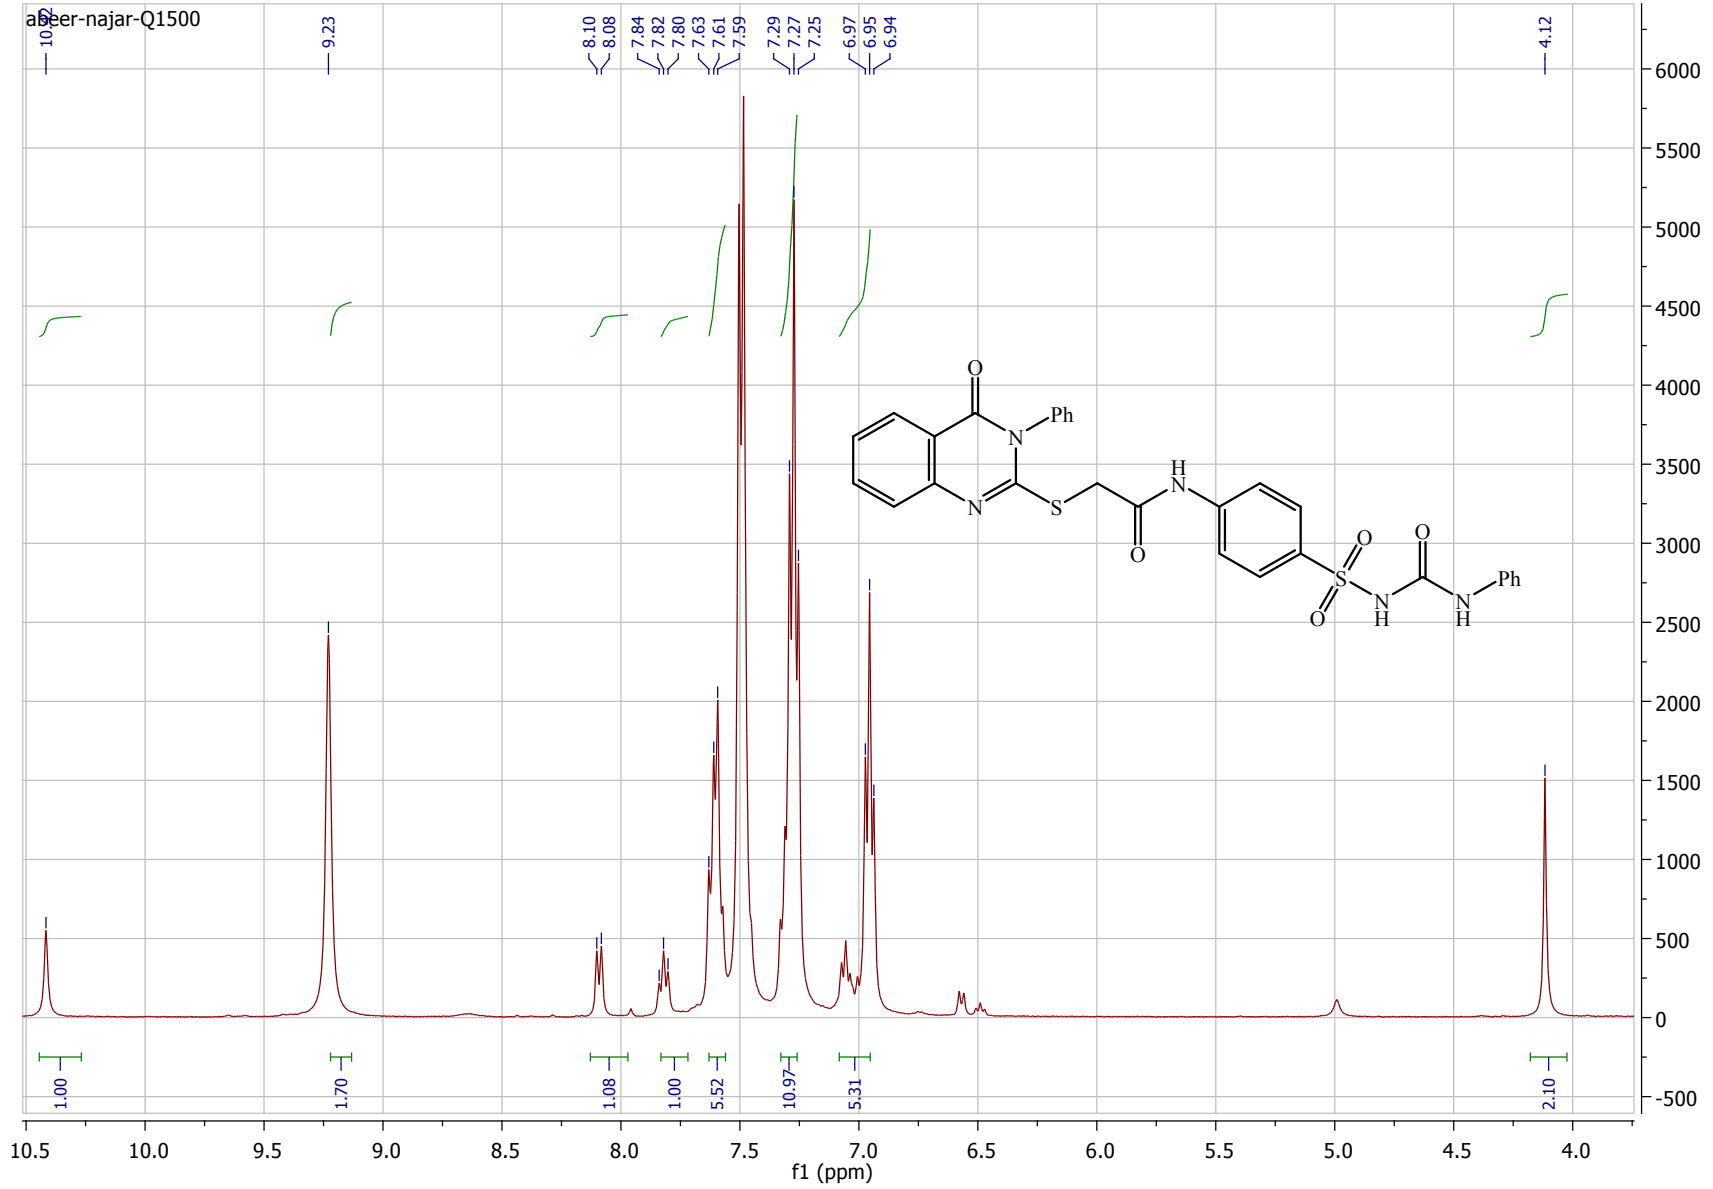

<sup>13</sup>C NMR

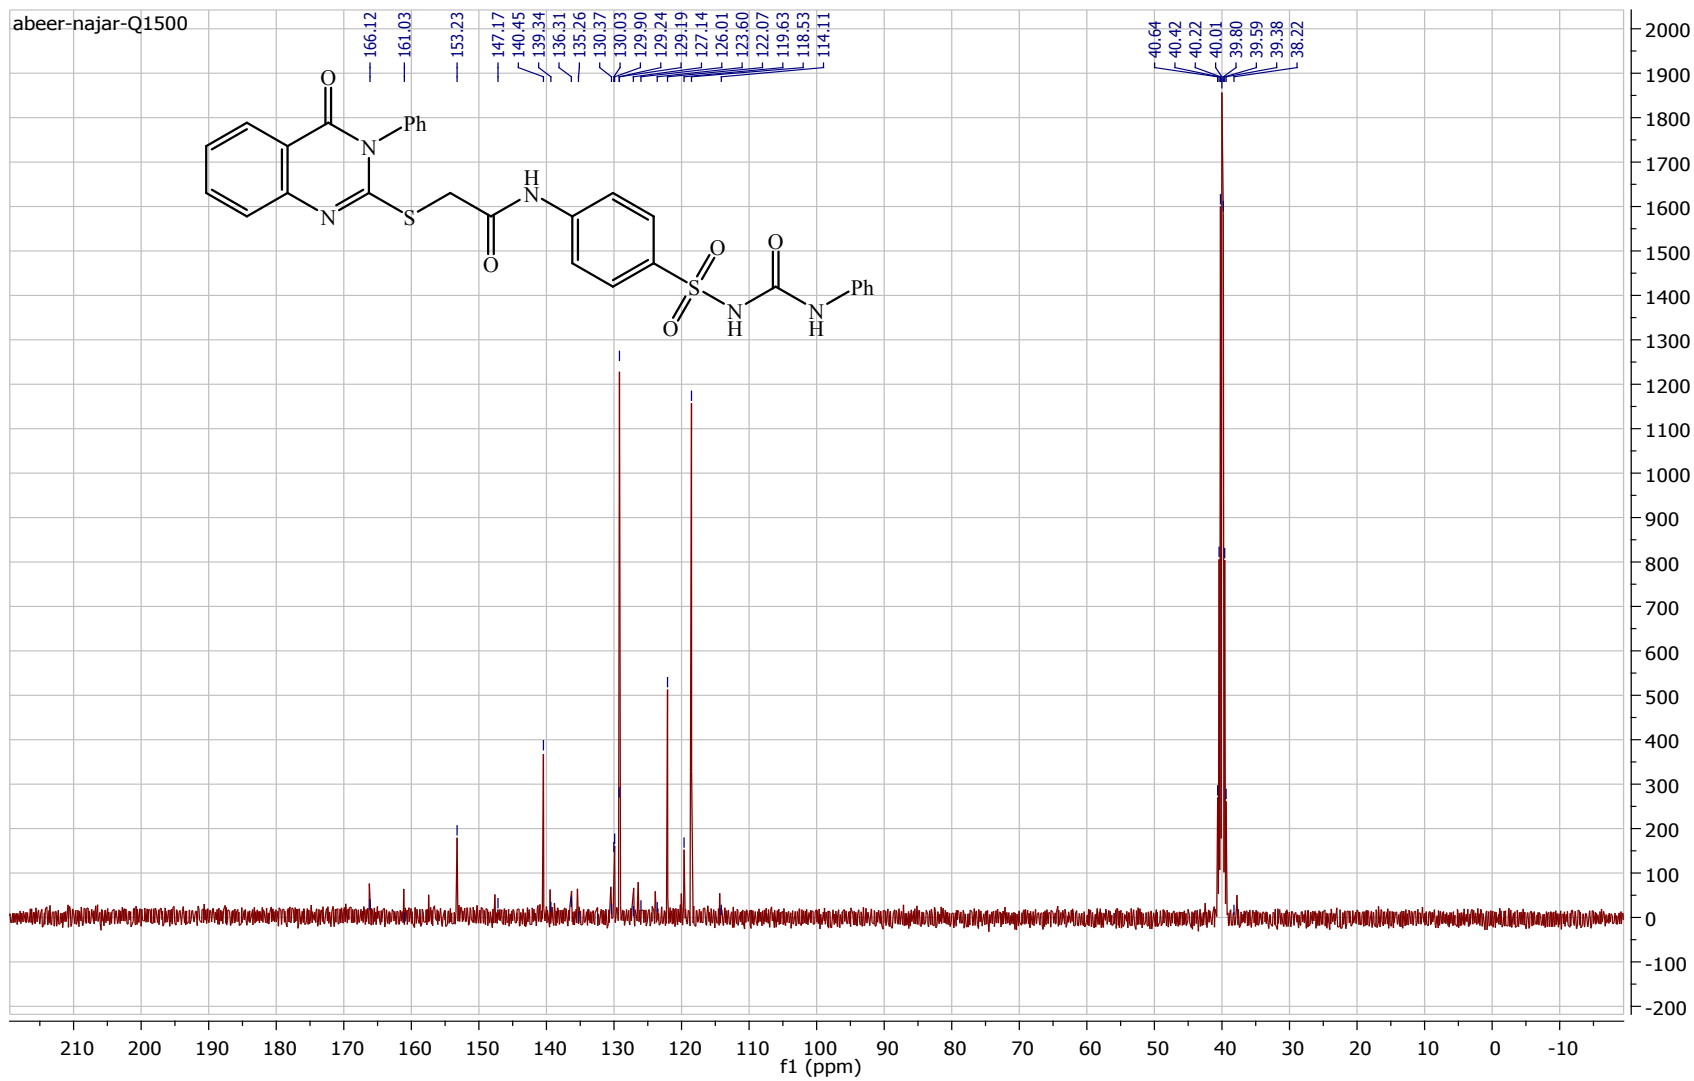

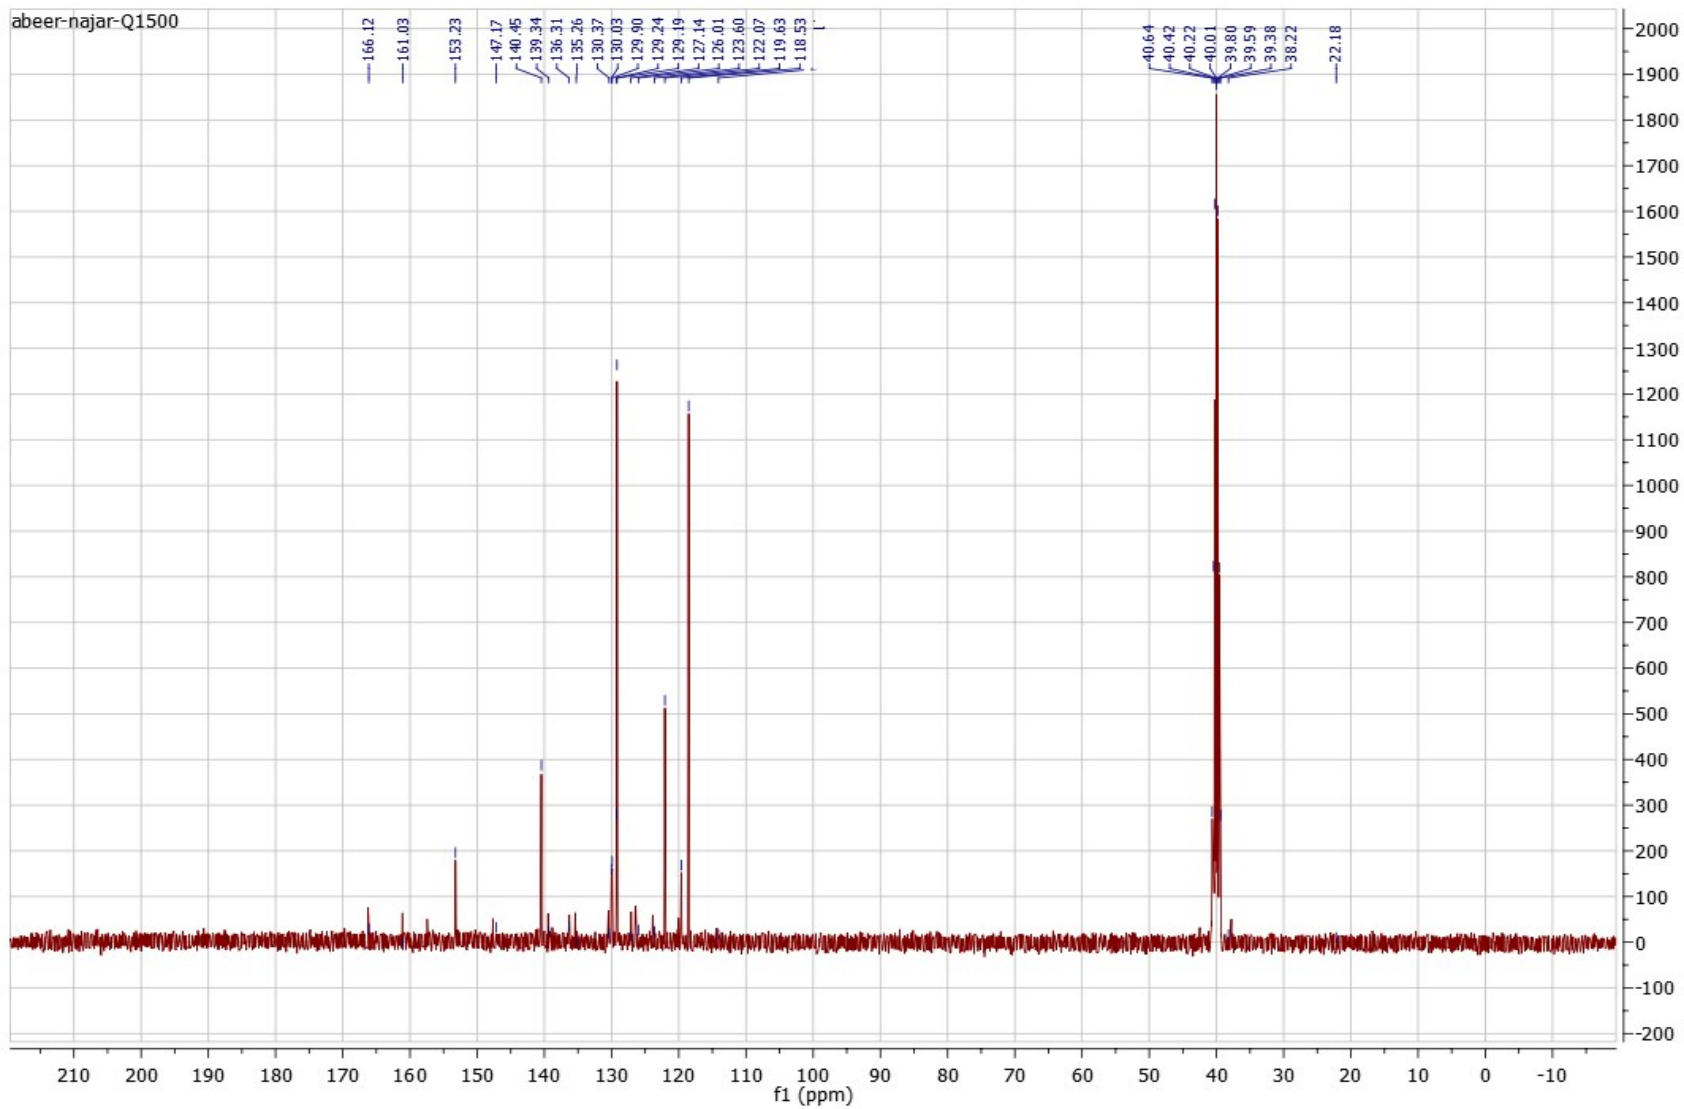



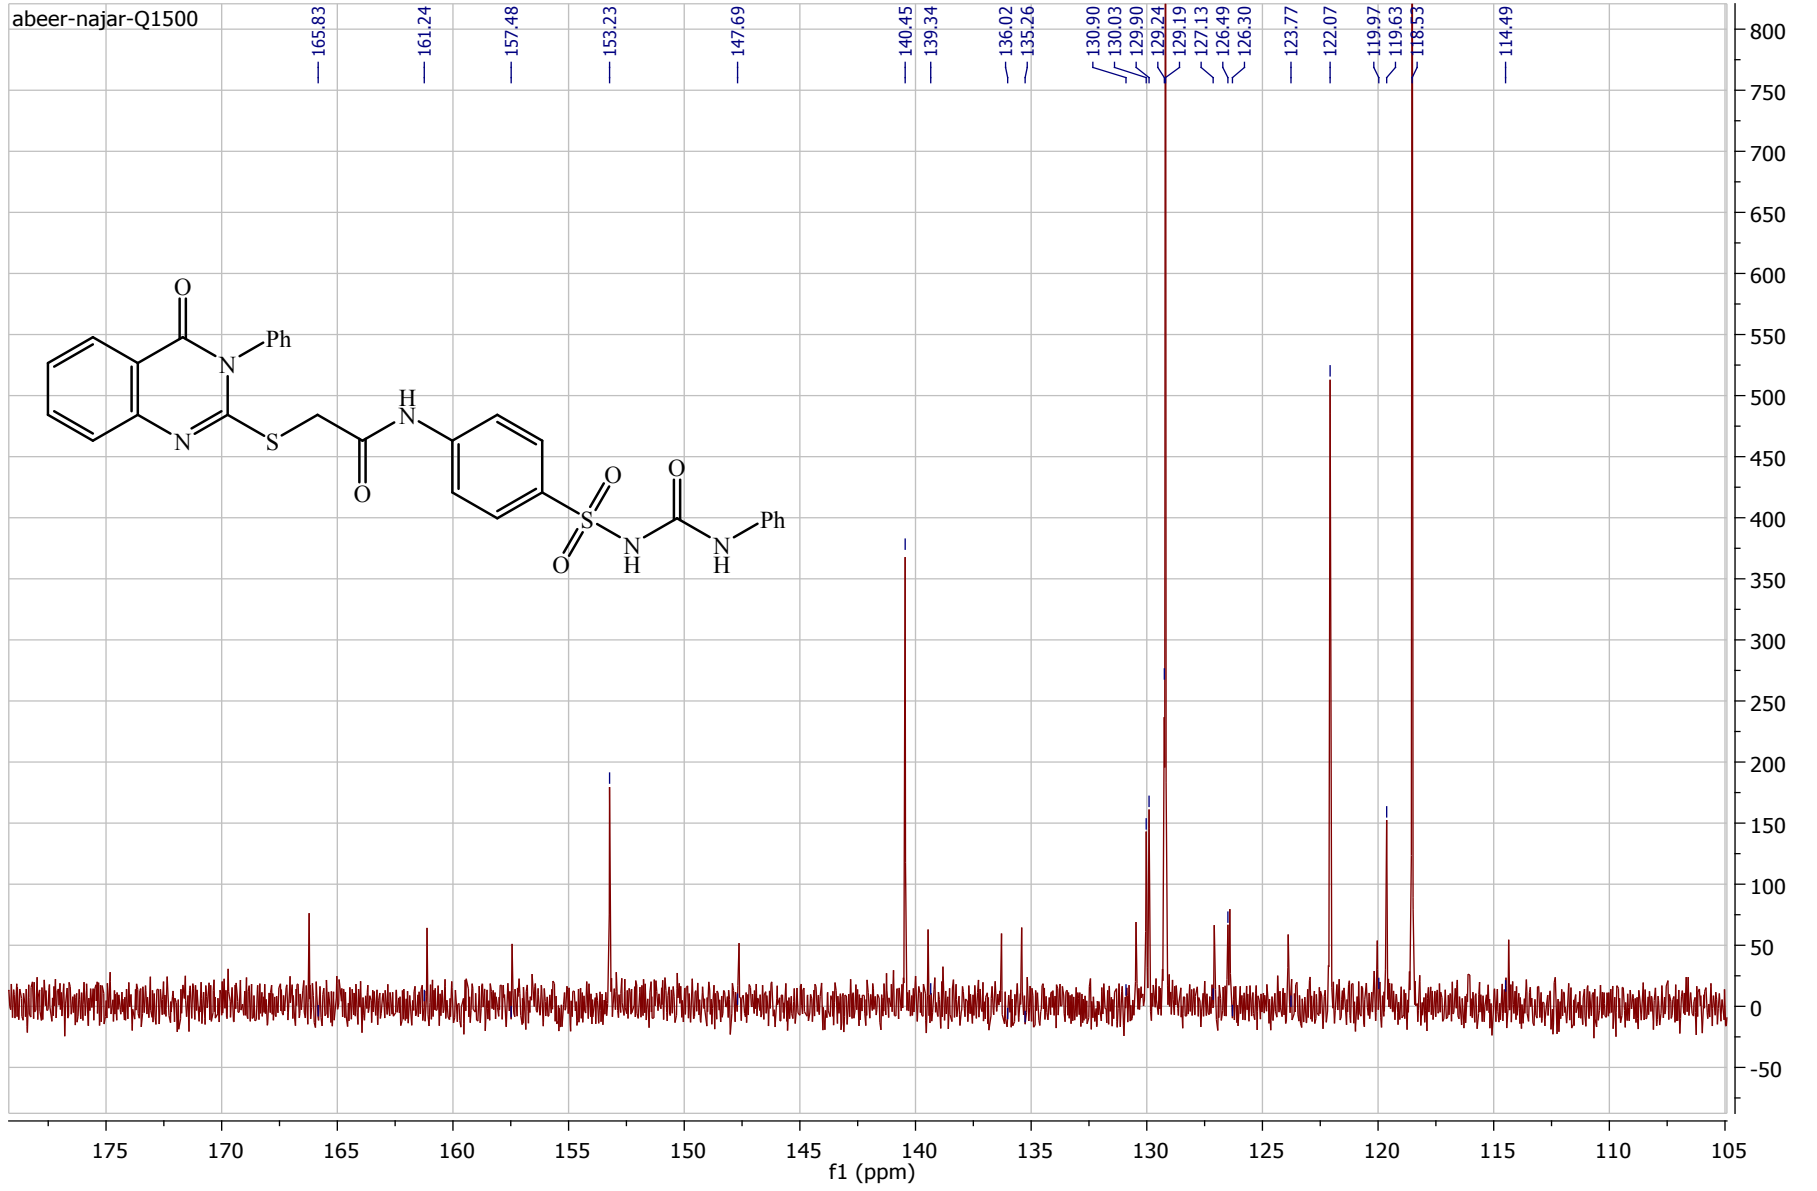

Mass

sayed-karam-Q1SUO #230 RT: 3.87 AV: 1 SB: 2 4.44 , 4.44 NL: 2.60E2  
T: {0,0} + c EI Full ms [40.00-1000.00]

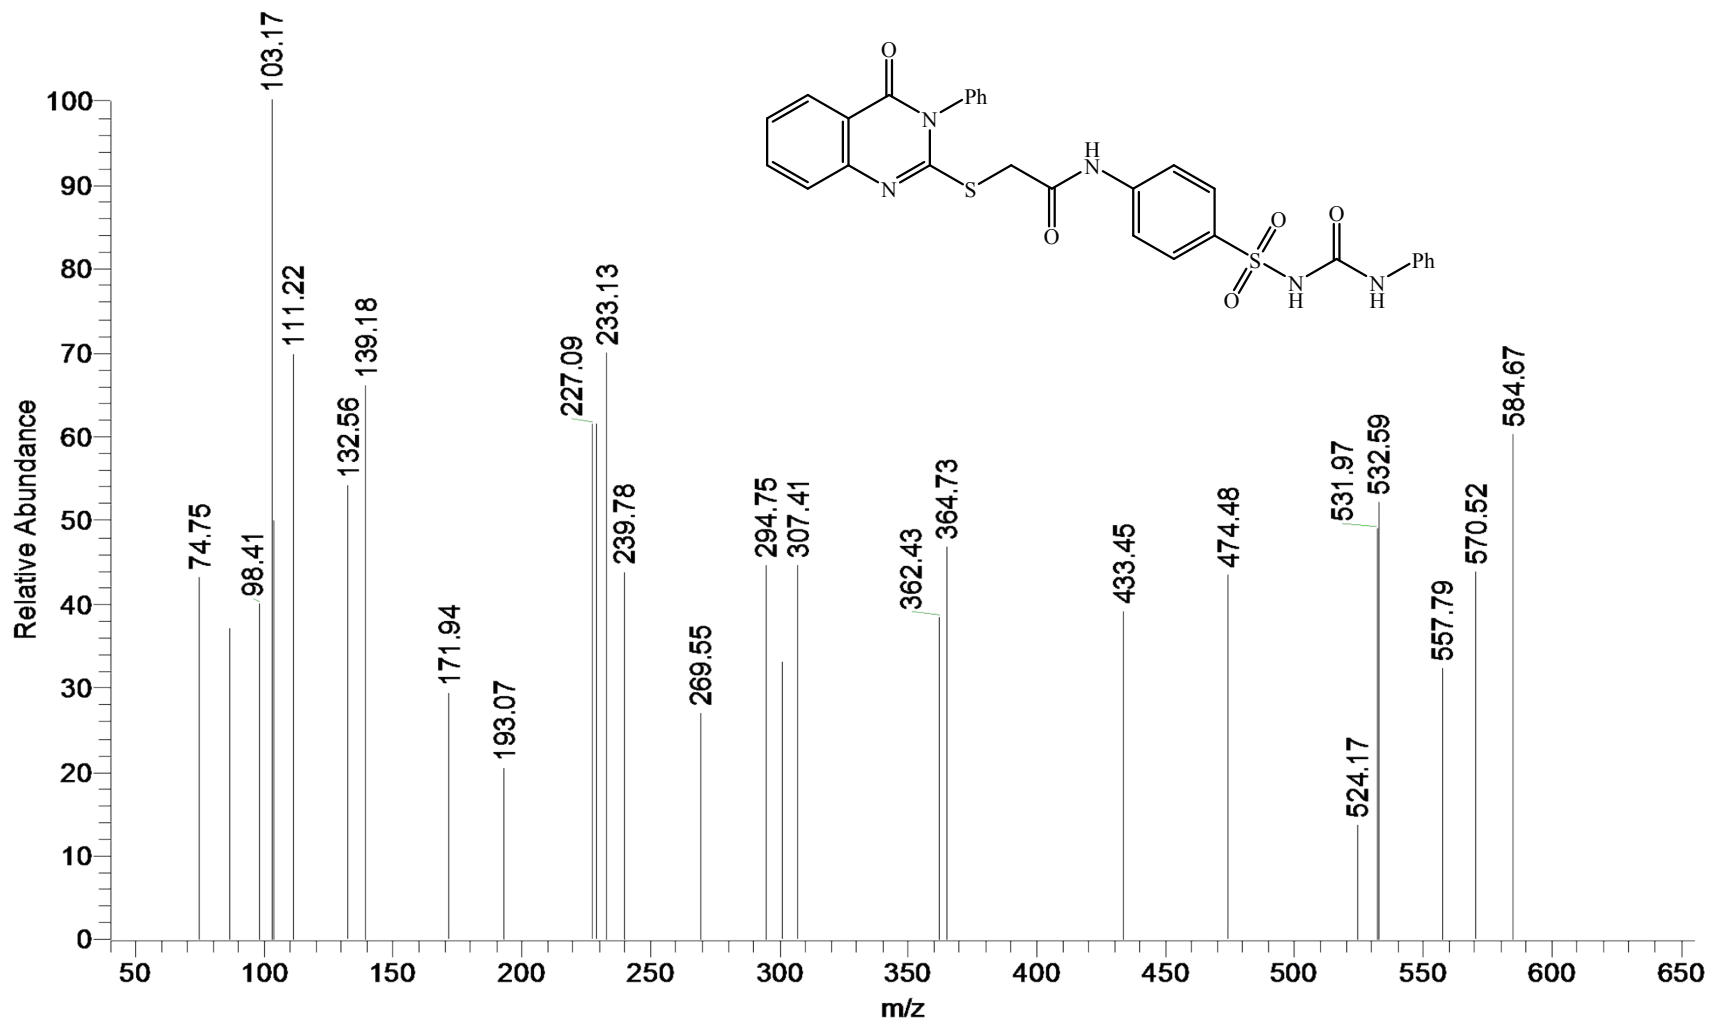

*2-((4-oxo-3-phenyl-3,4-dihydroquinazolin-2-yl)thio)-N-(4-(N-(phenylcarbamothioyl) sulfamoyl) phenyl)acetamide (7b).*

IR

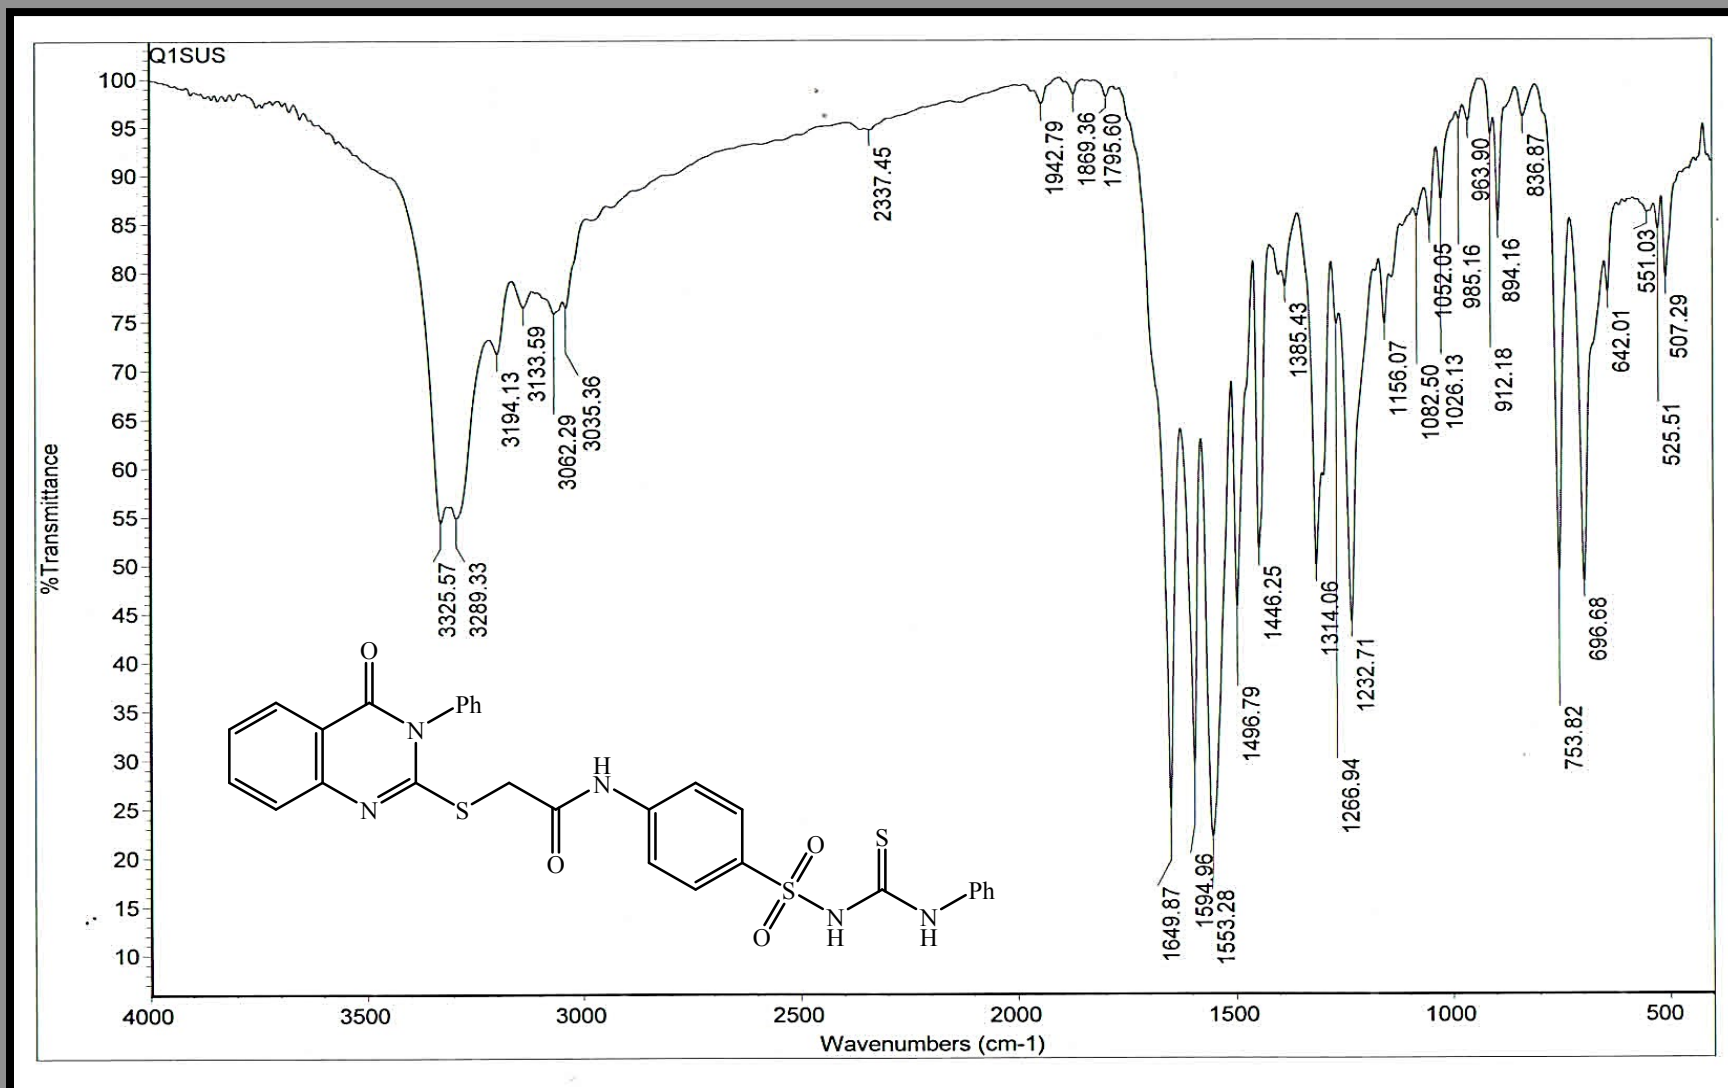

**HNMR**

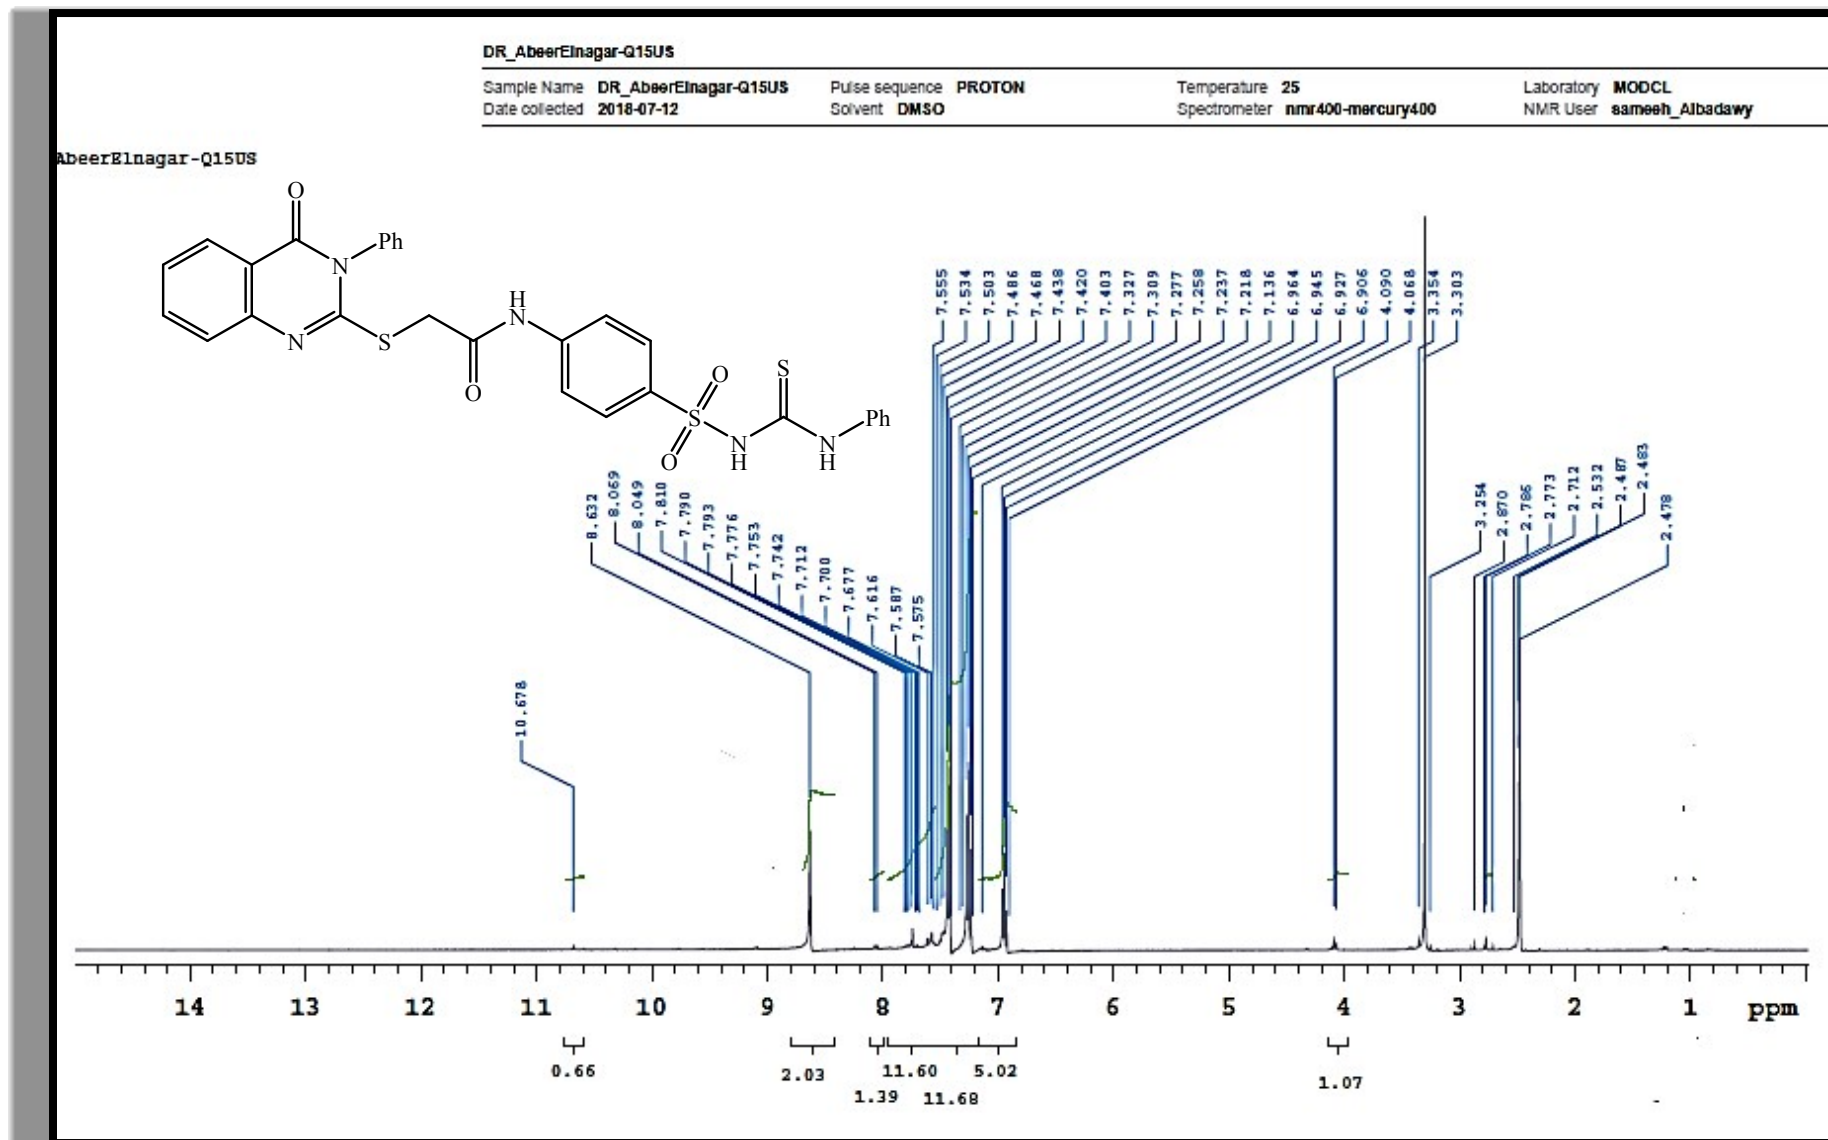

DR\_AbeerElnagar-Q15US\_PROTON\_01  
DR\_AbeerElnagar-Q15US

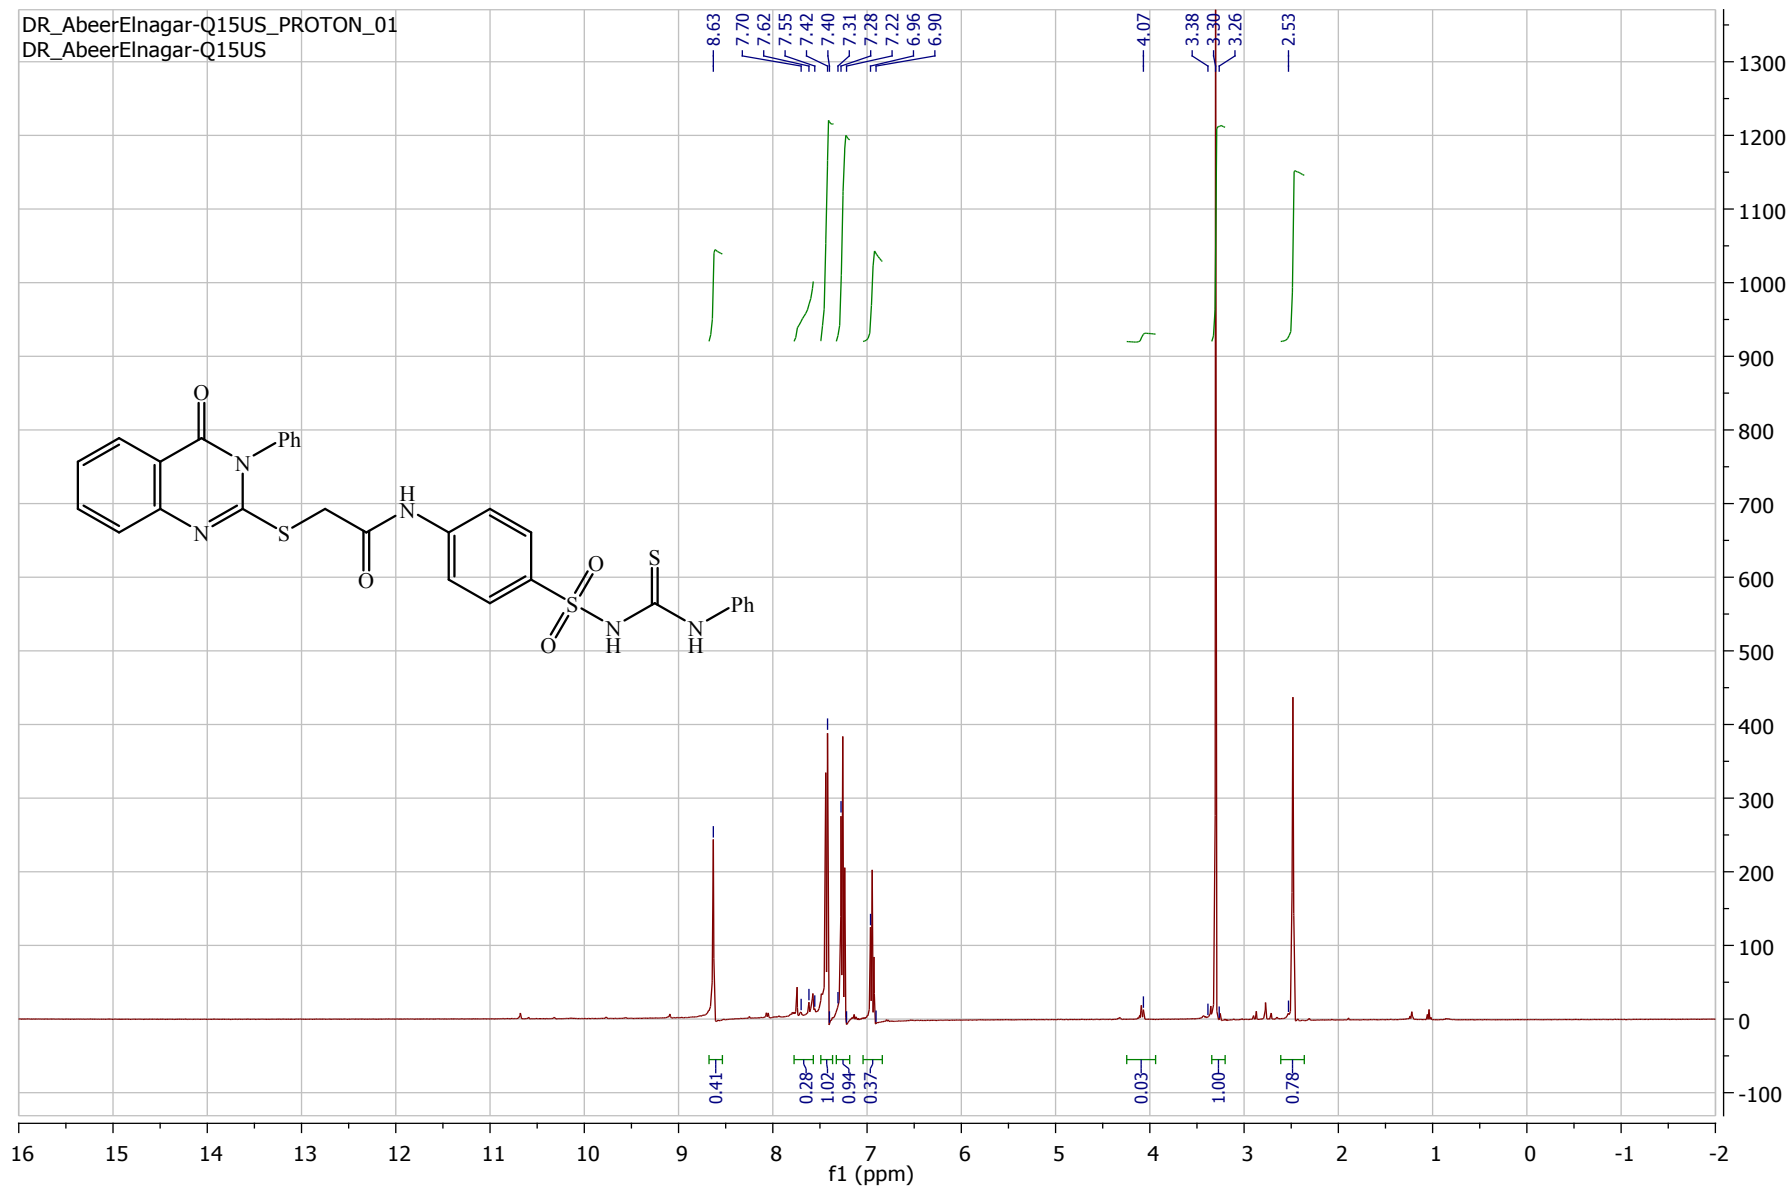

abeer-najar-Qsus

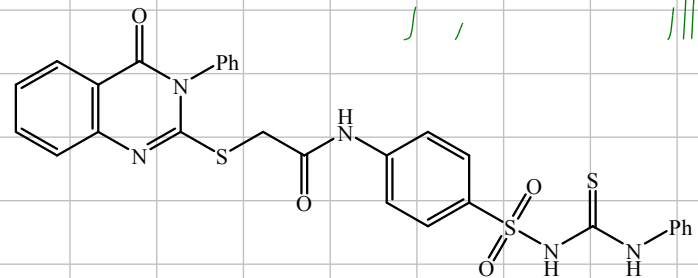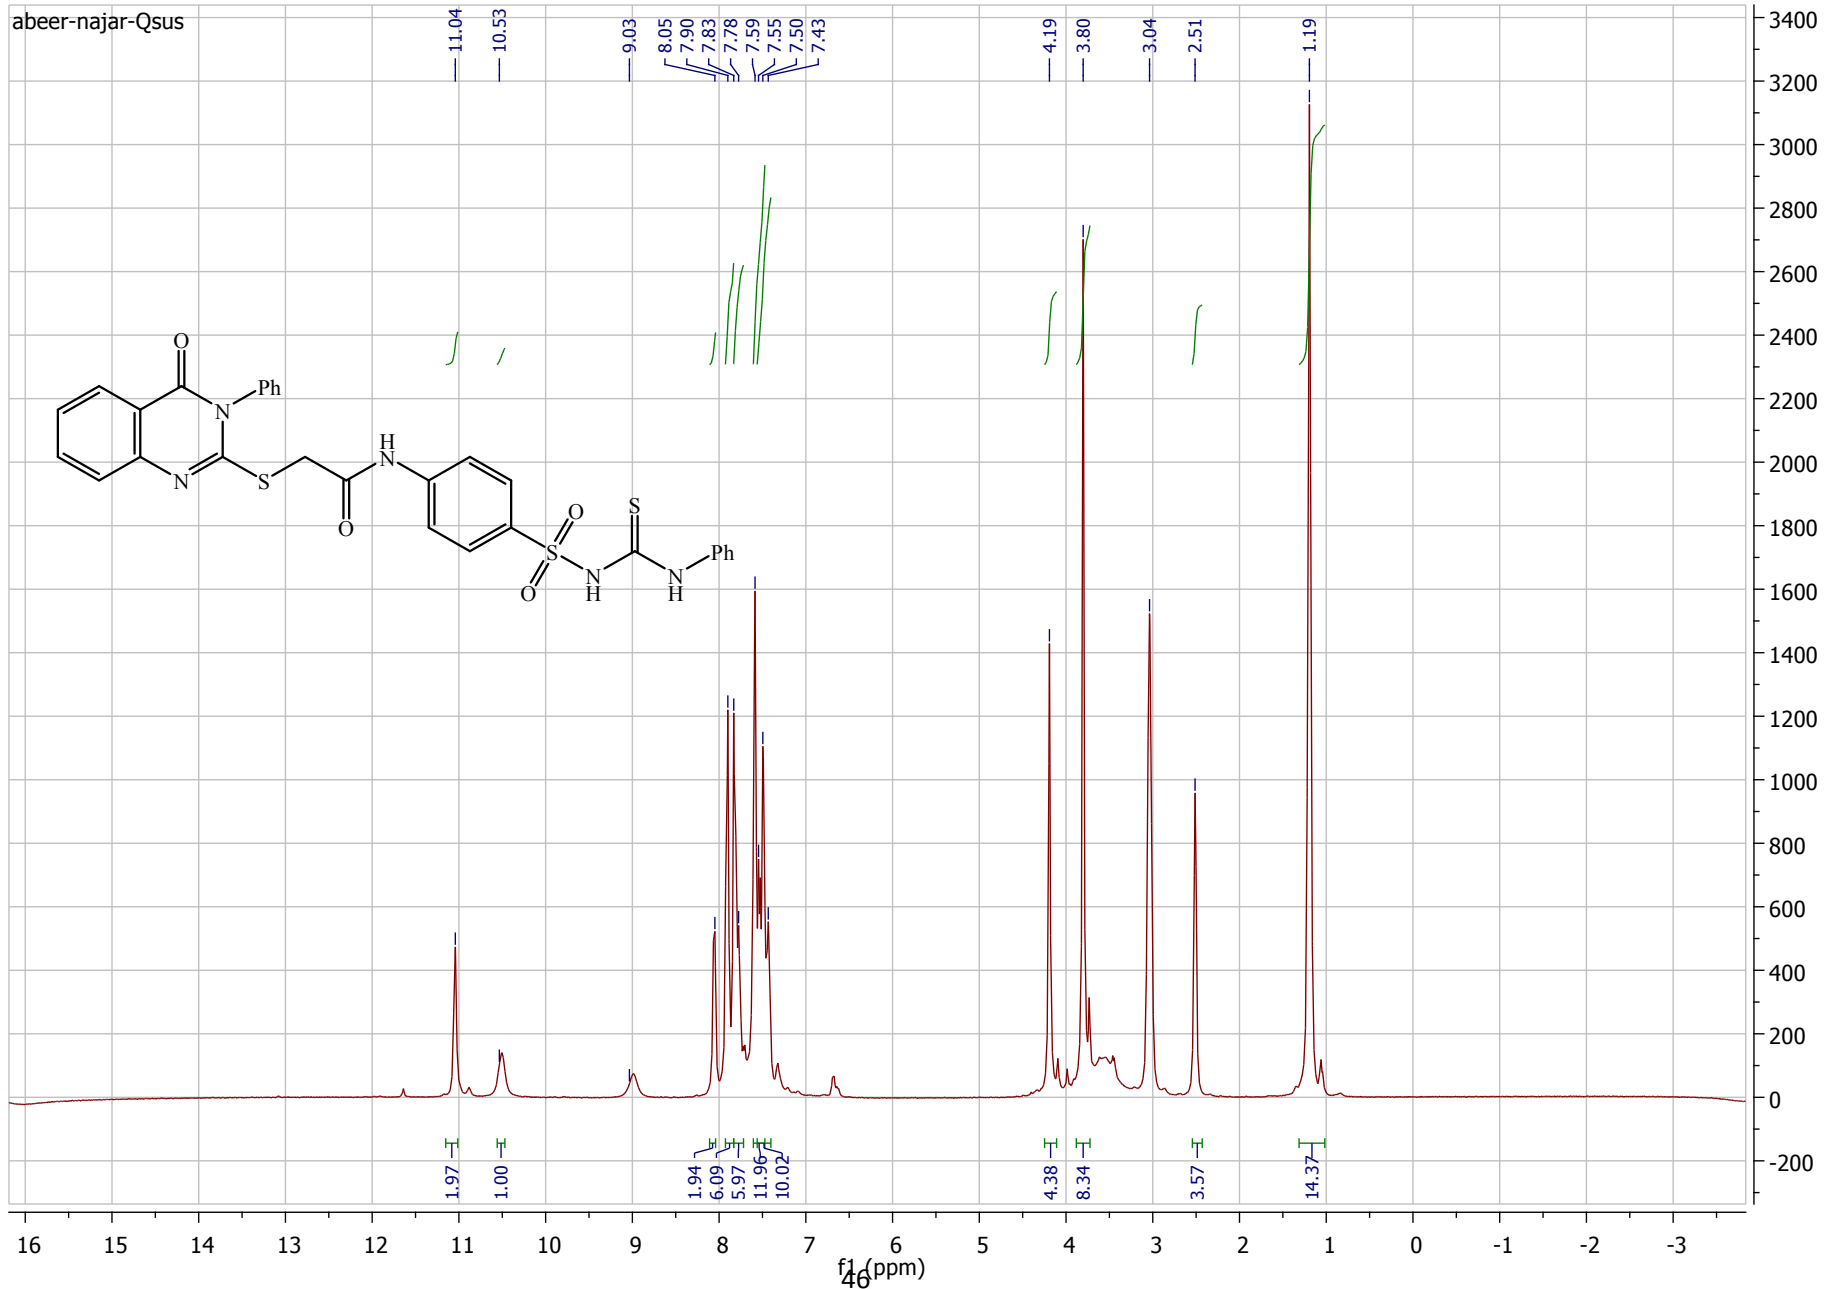

f1 (ppm)



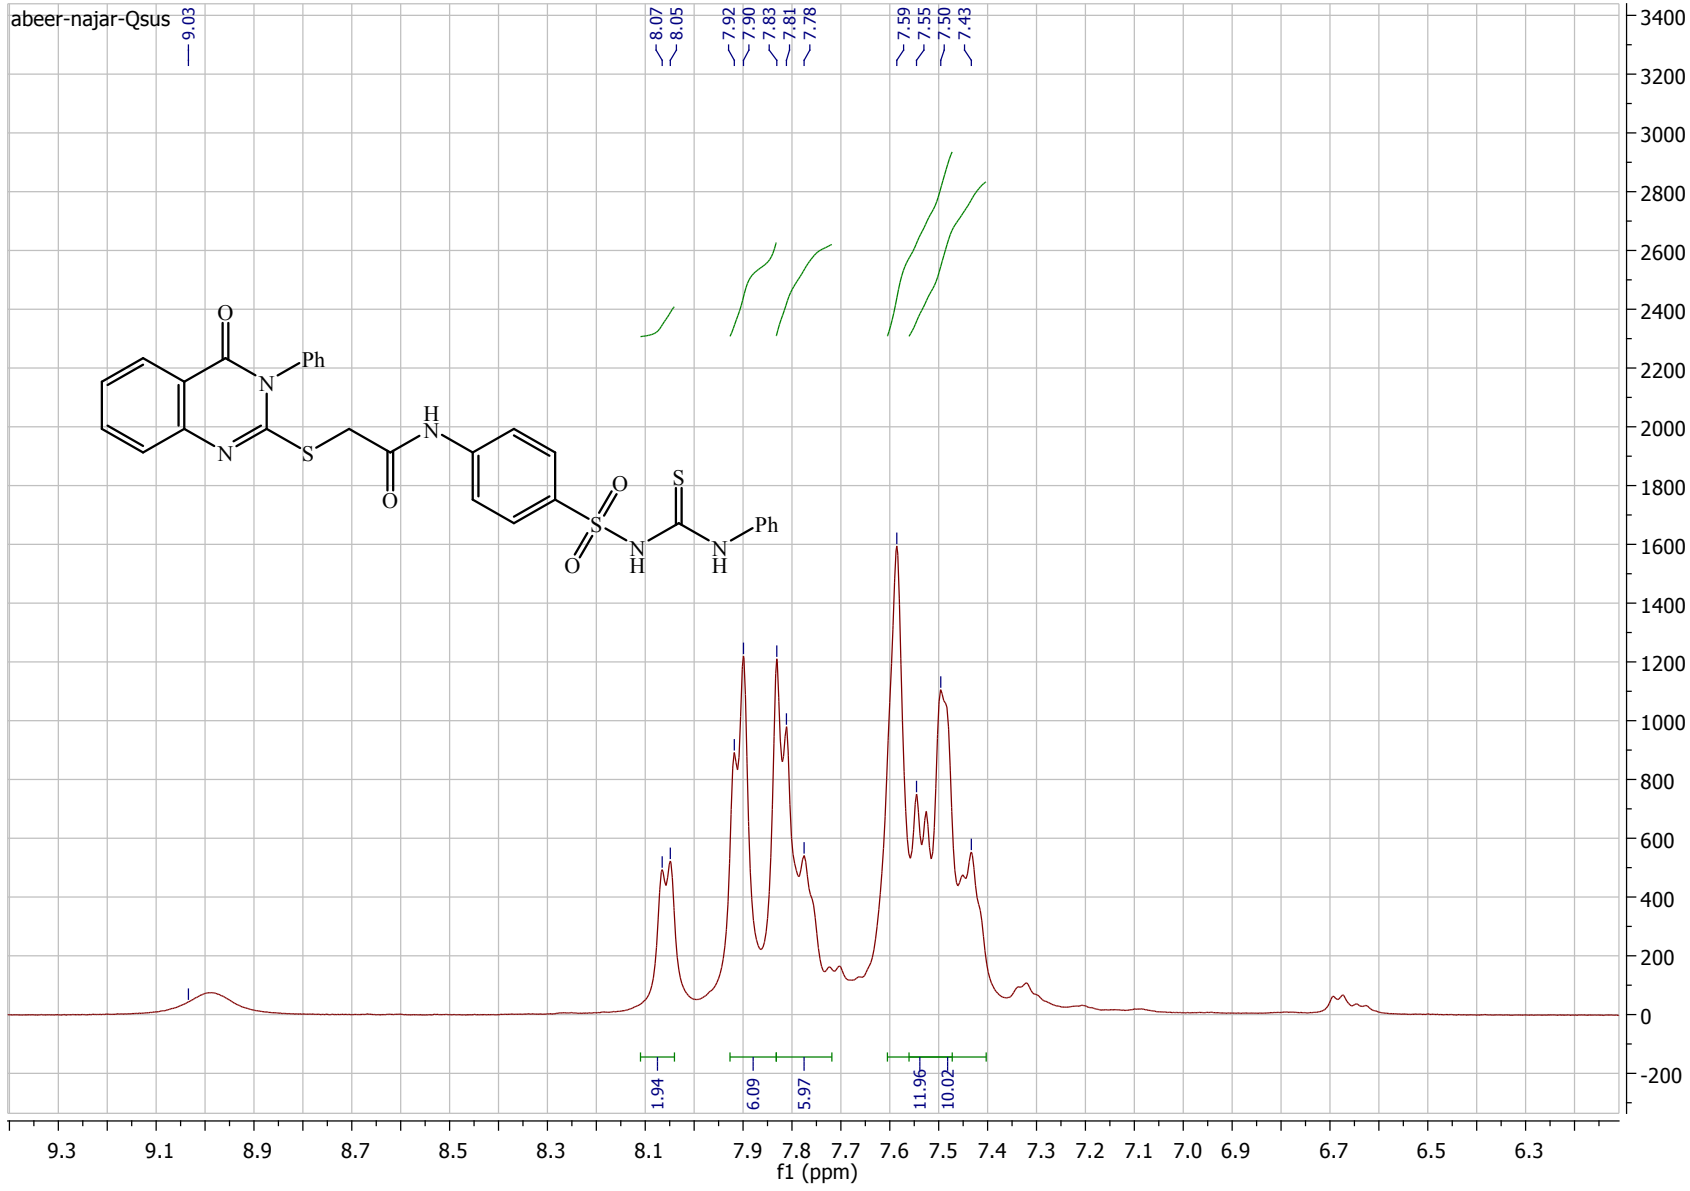



**<sup>13</sup>C NMR**

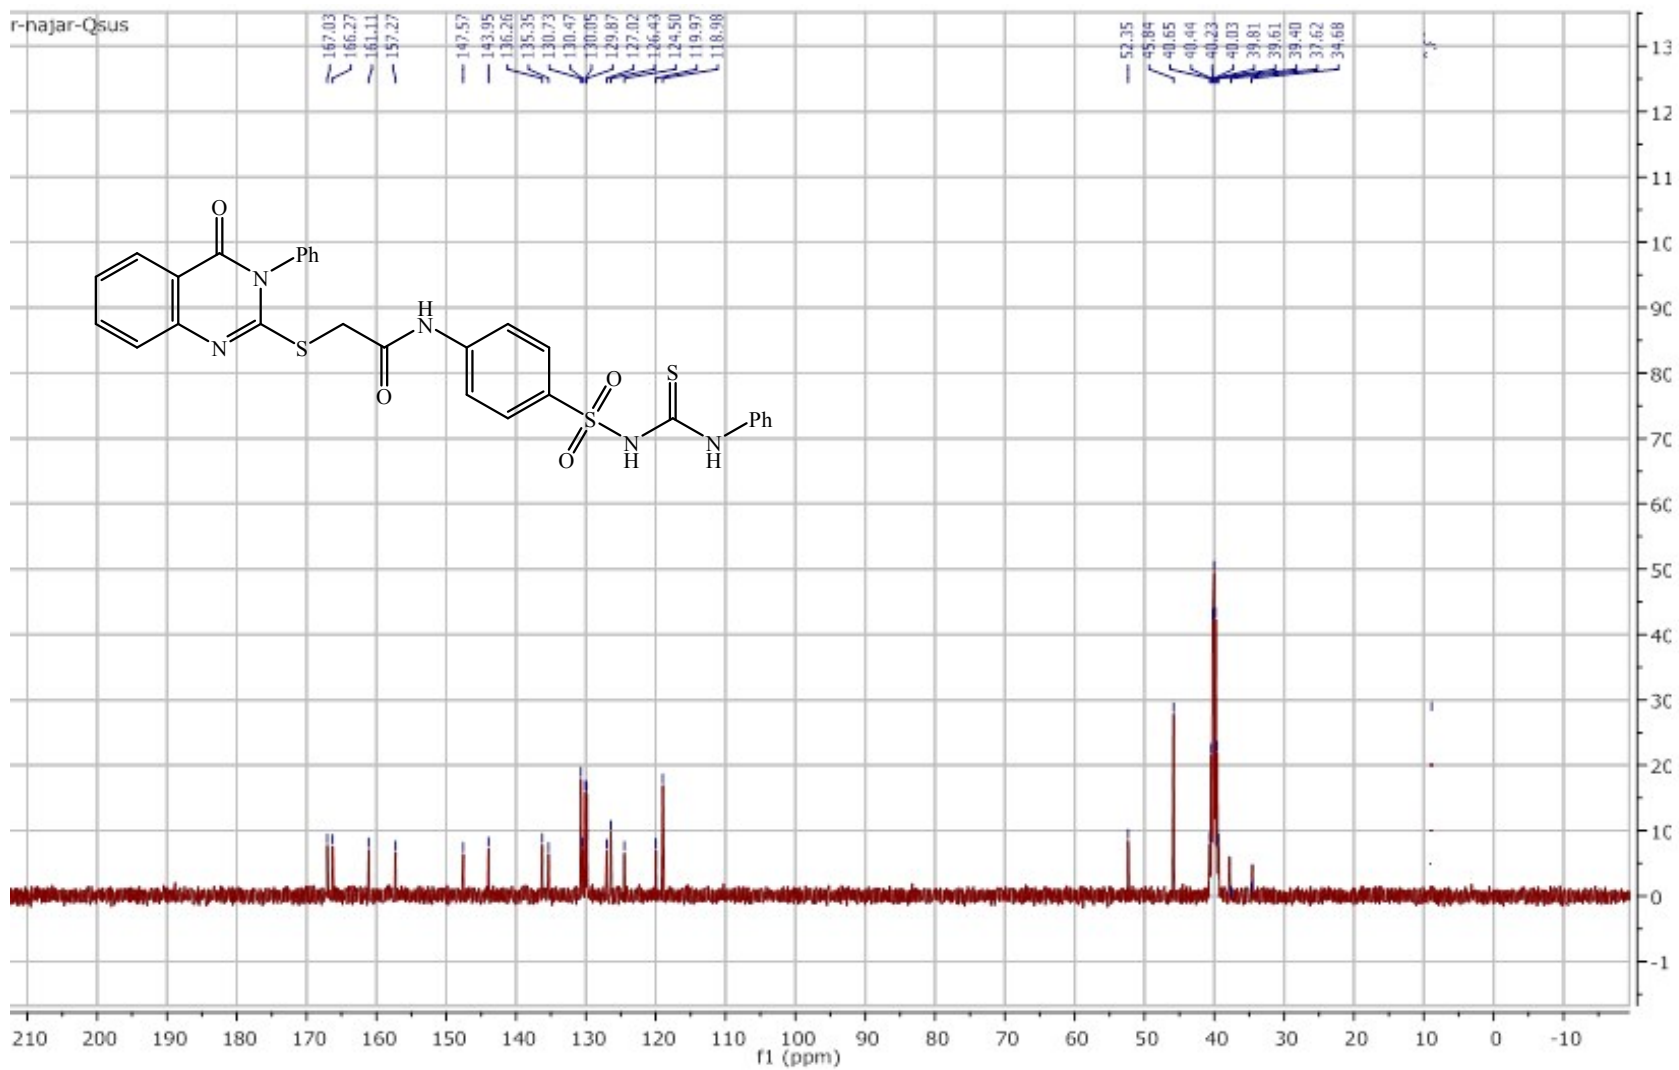

*N*-(4-(6-Amino-5-cyano-4-(4-methoxyphenyl)pyridin-2-yl)phenyl)-2-((4-oxo-3-phenyl-3,4-dihydroquinazolin-2-yl)thio)acetamide (8a).

IR

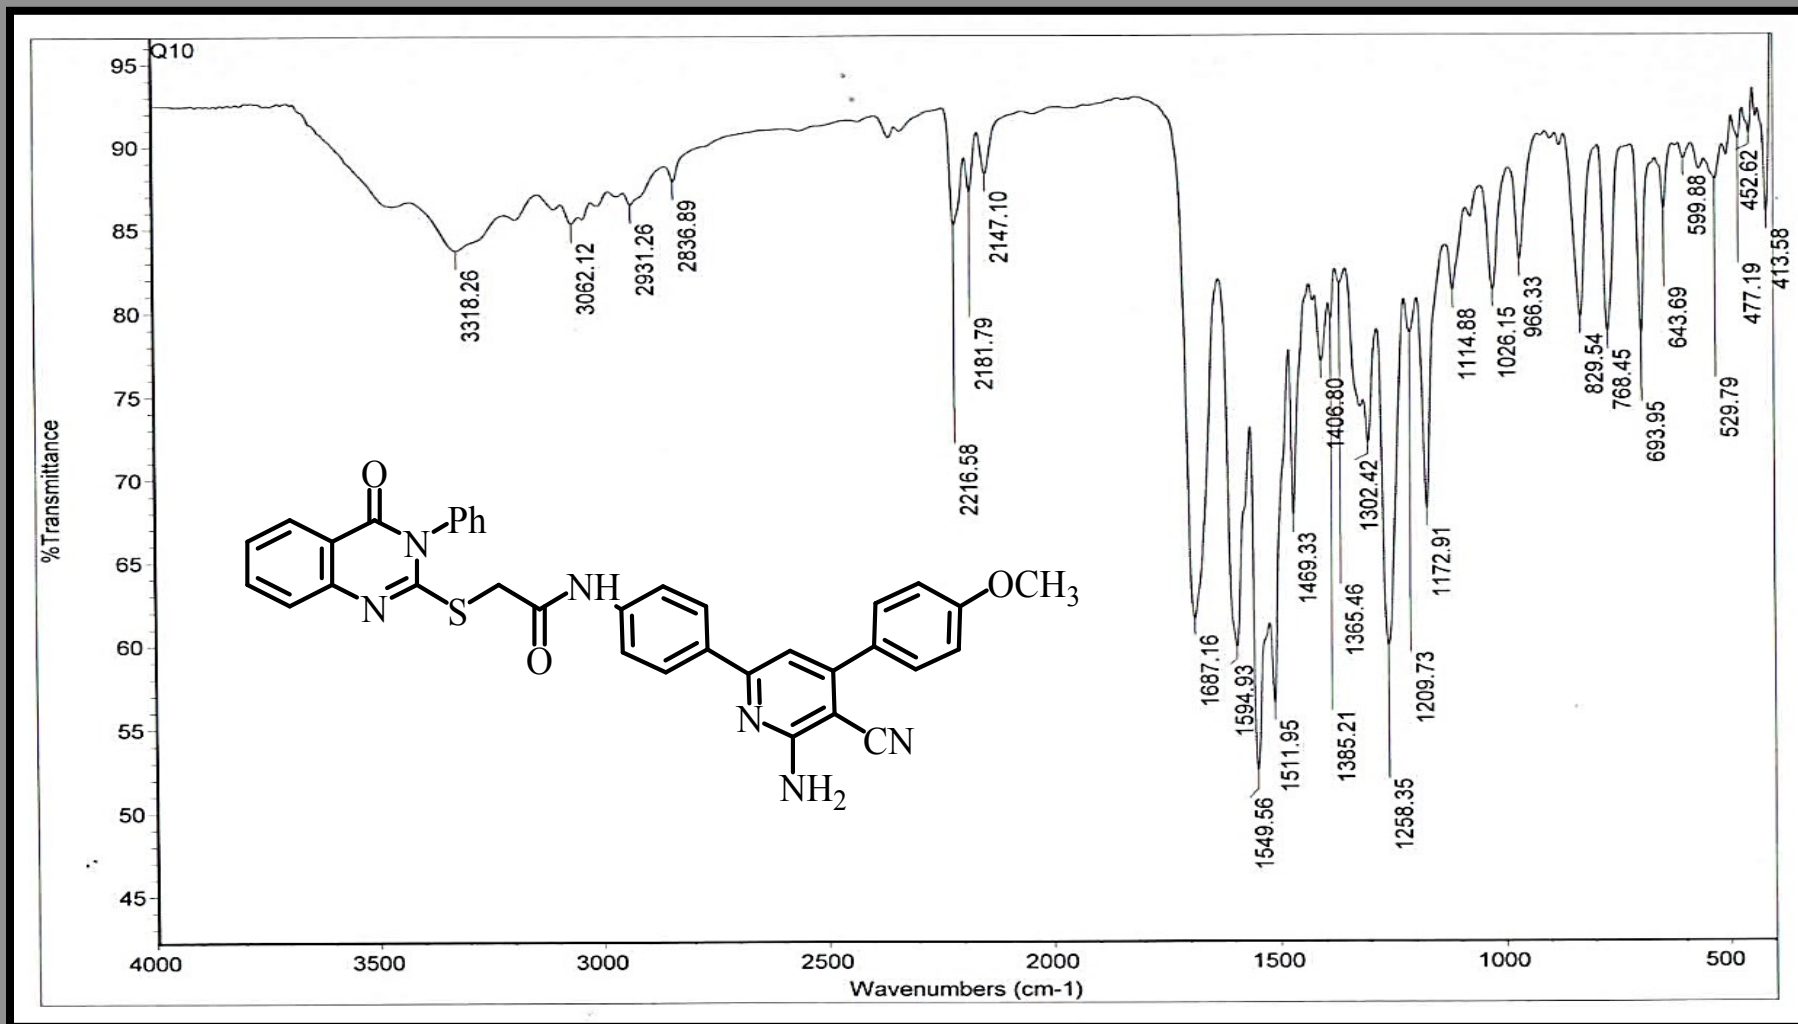

# HNMR

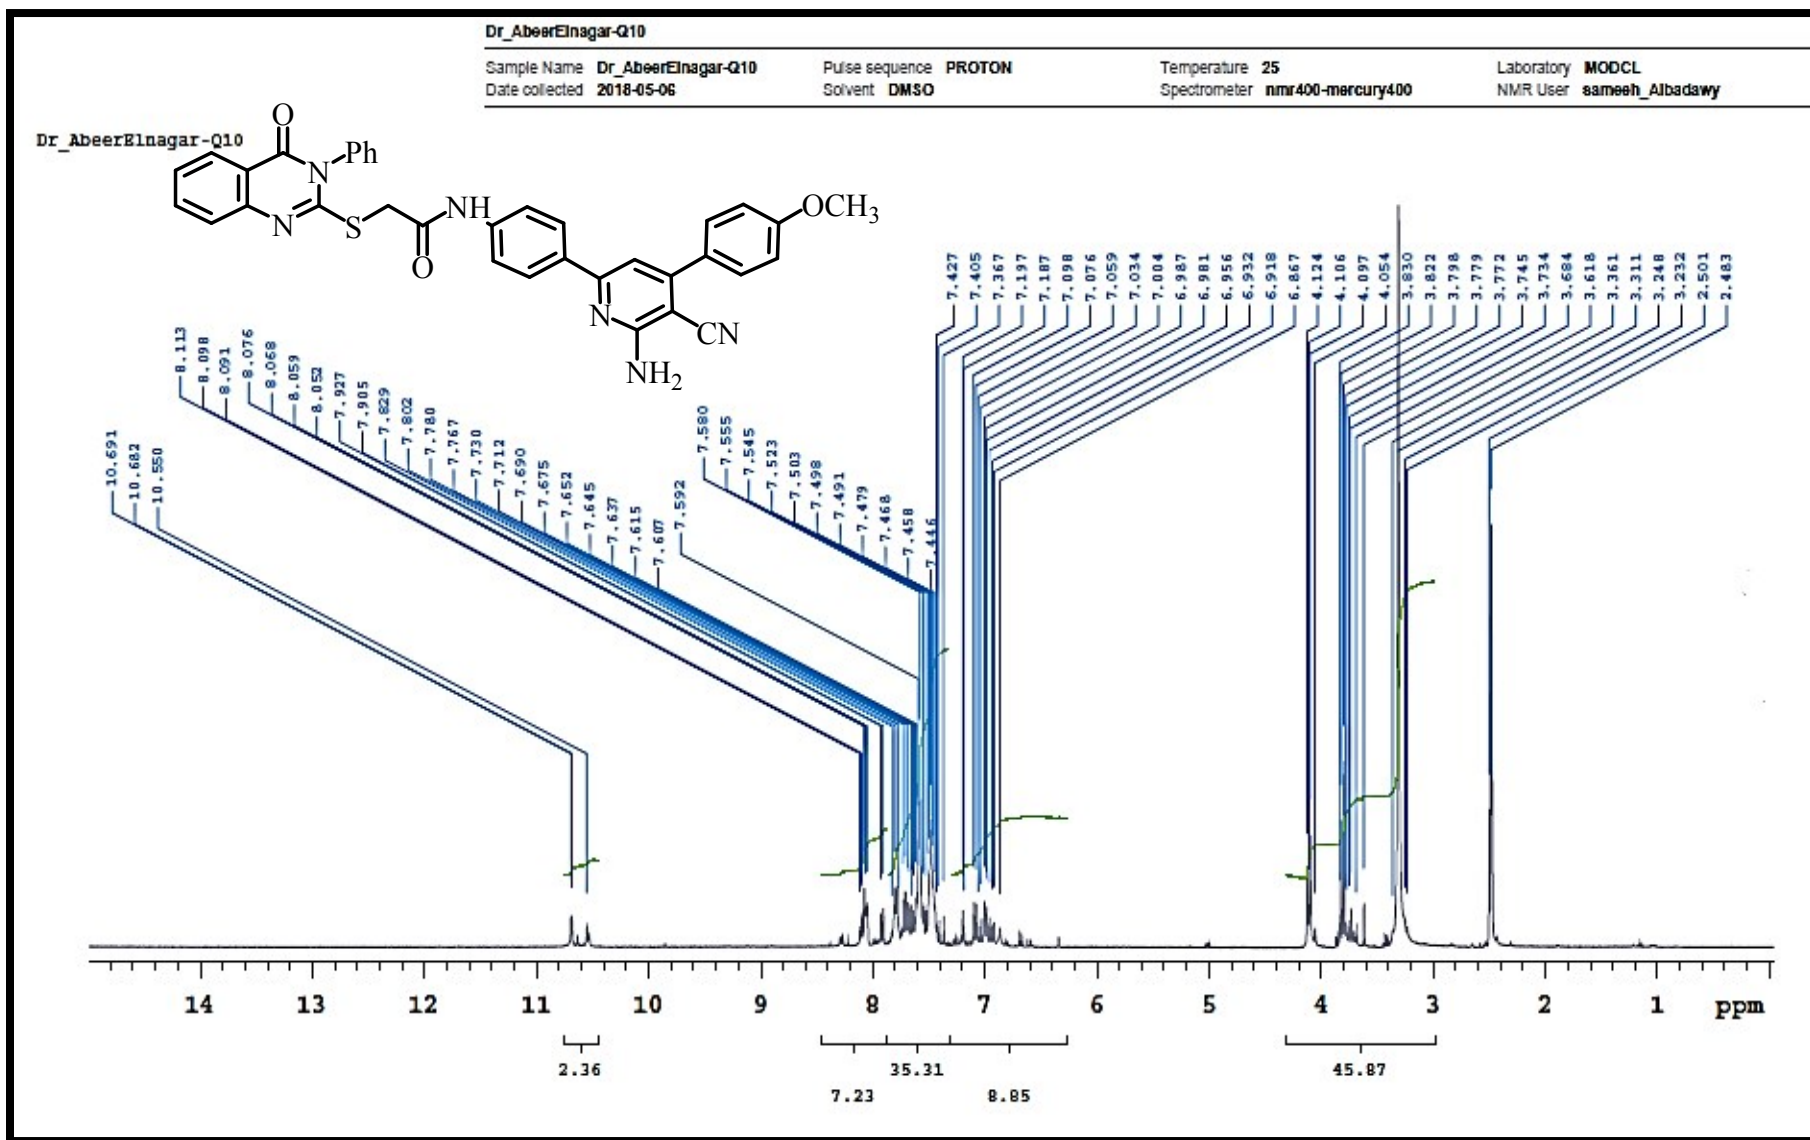

D2O

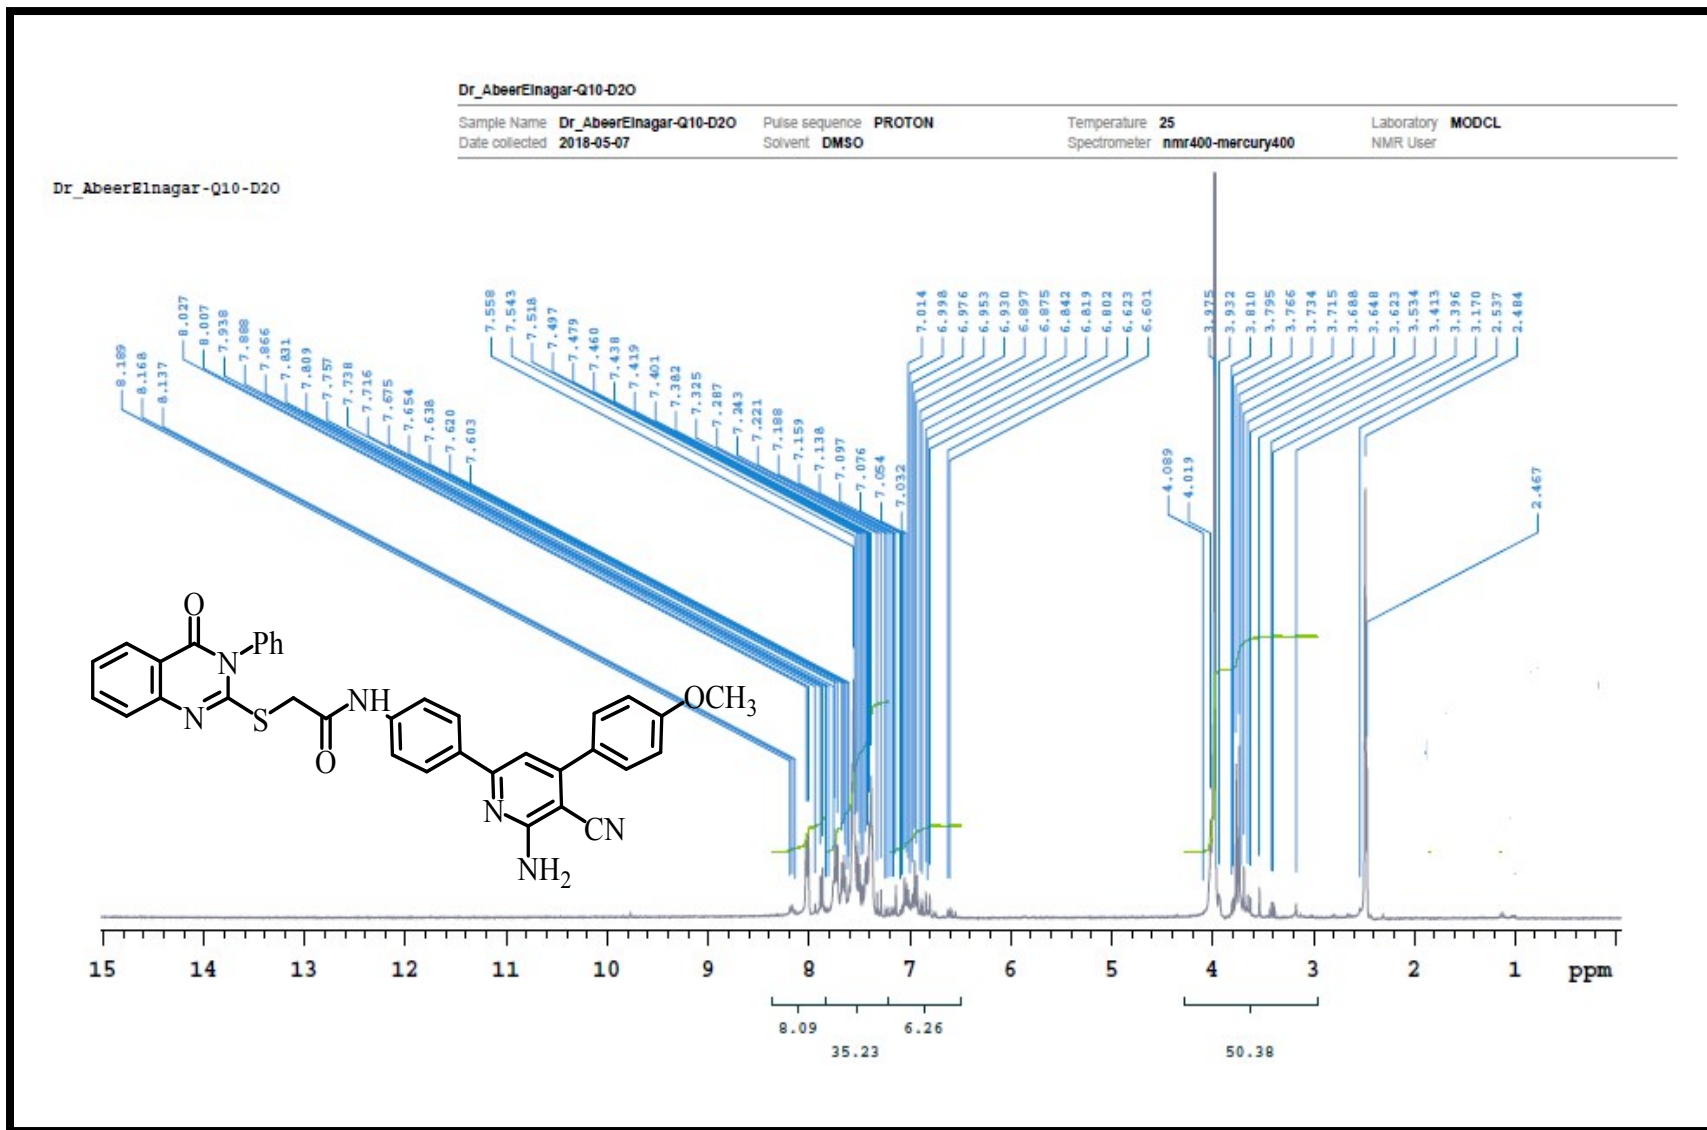

abeer-najar-Q10

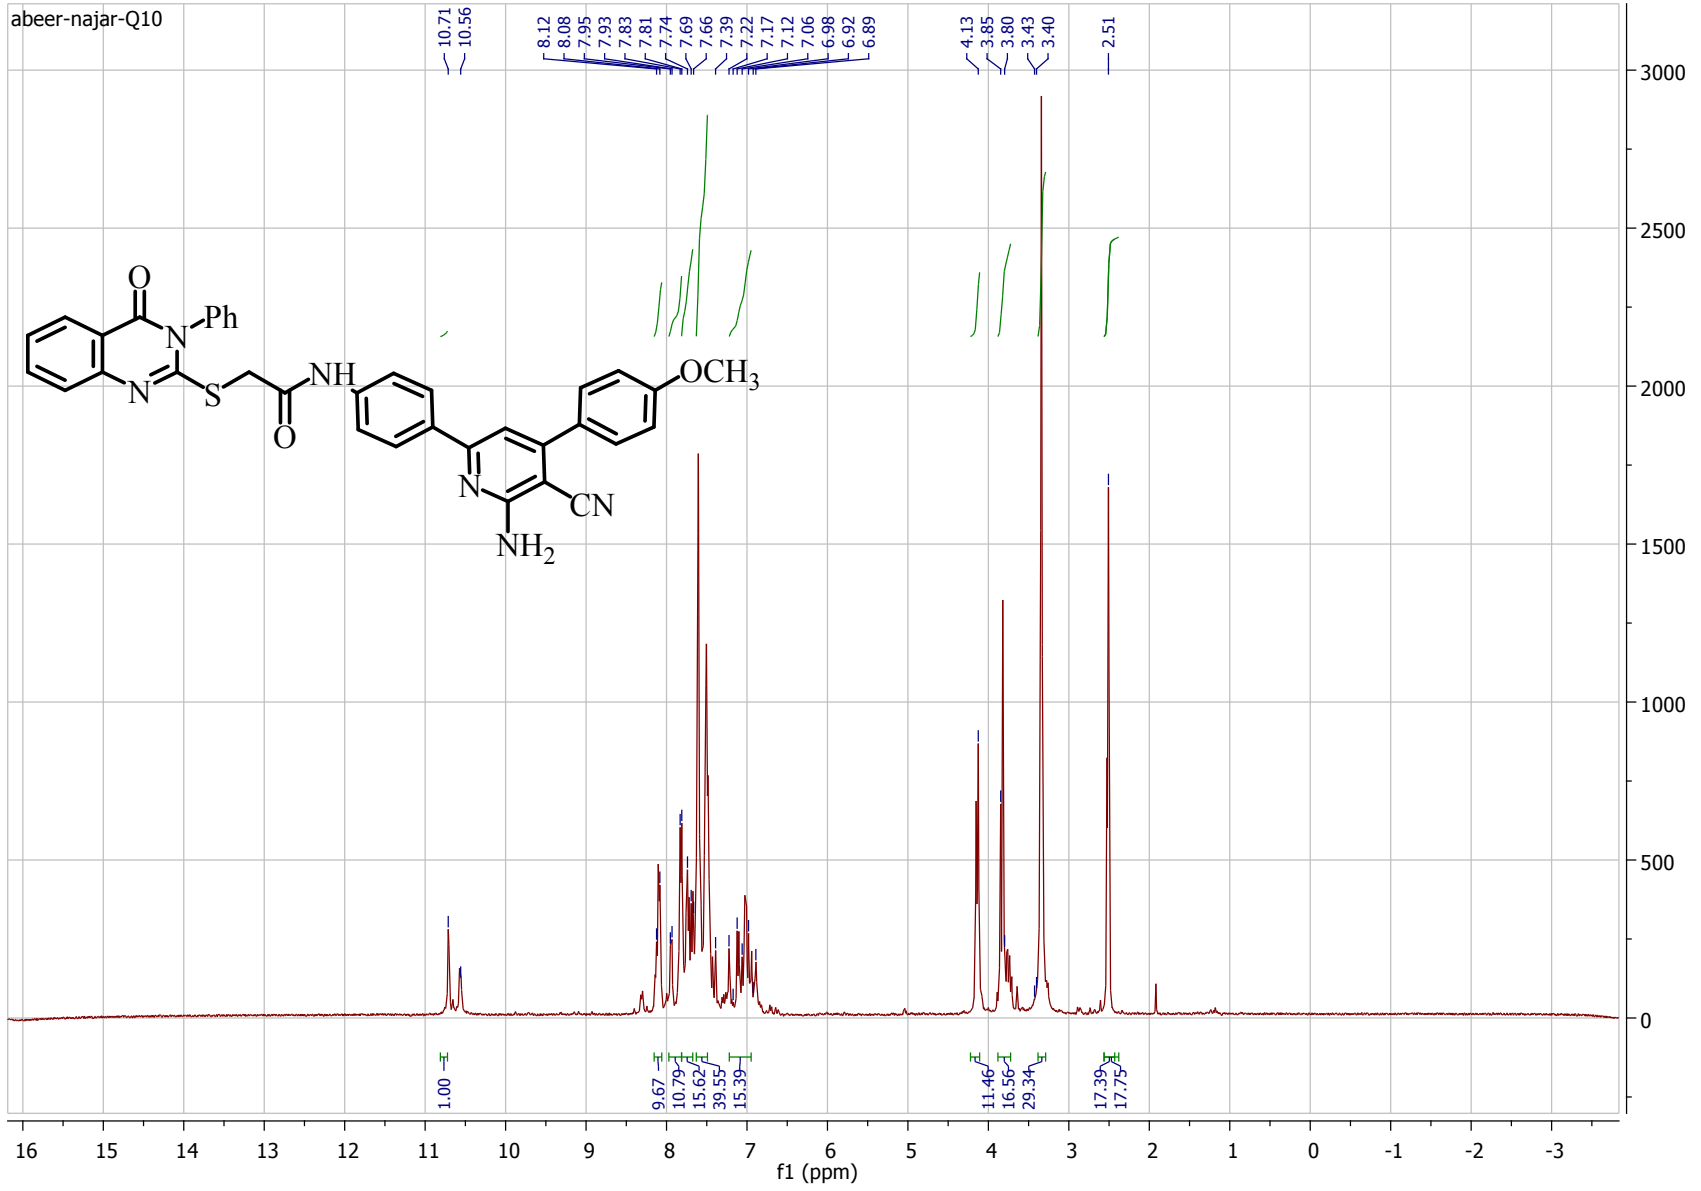

abeer-najar-Q10

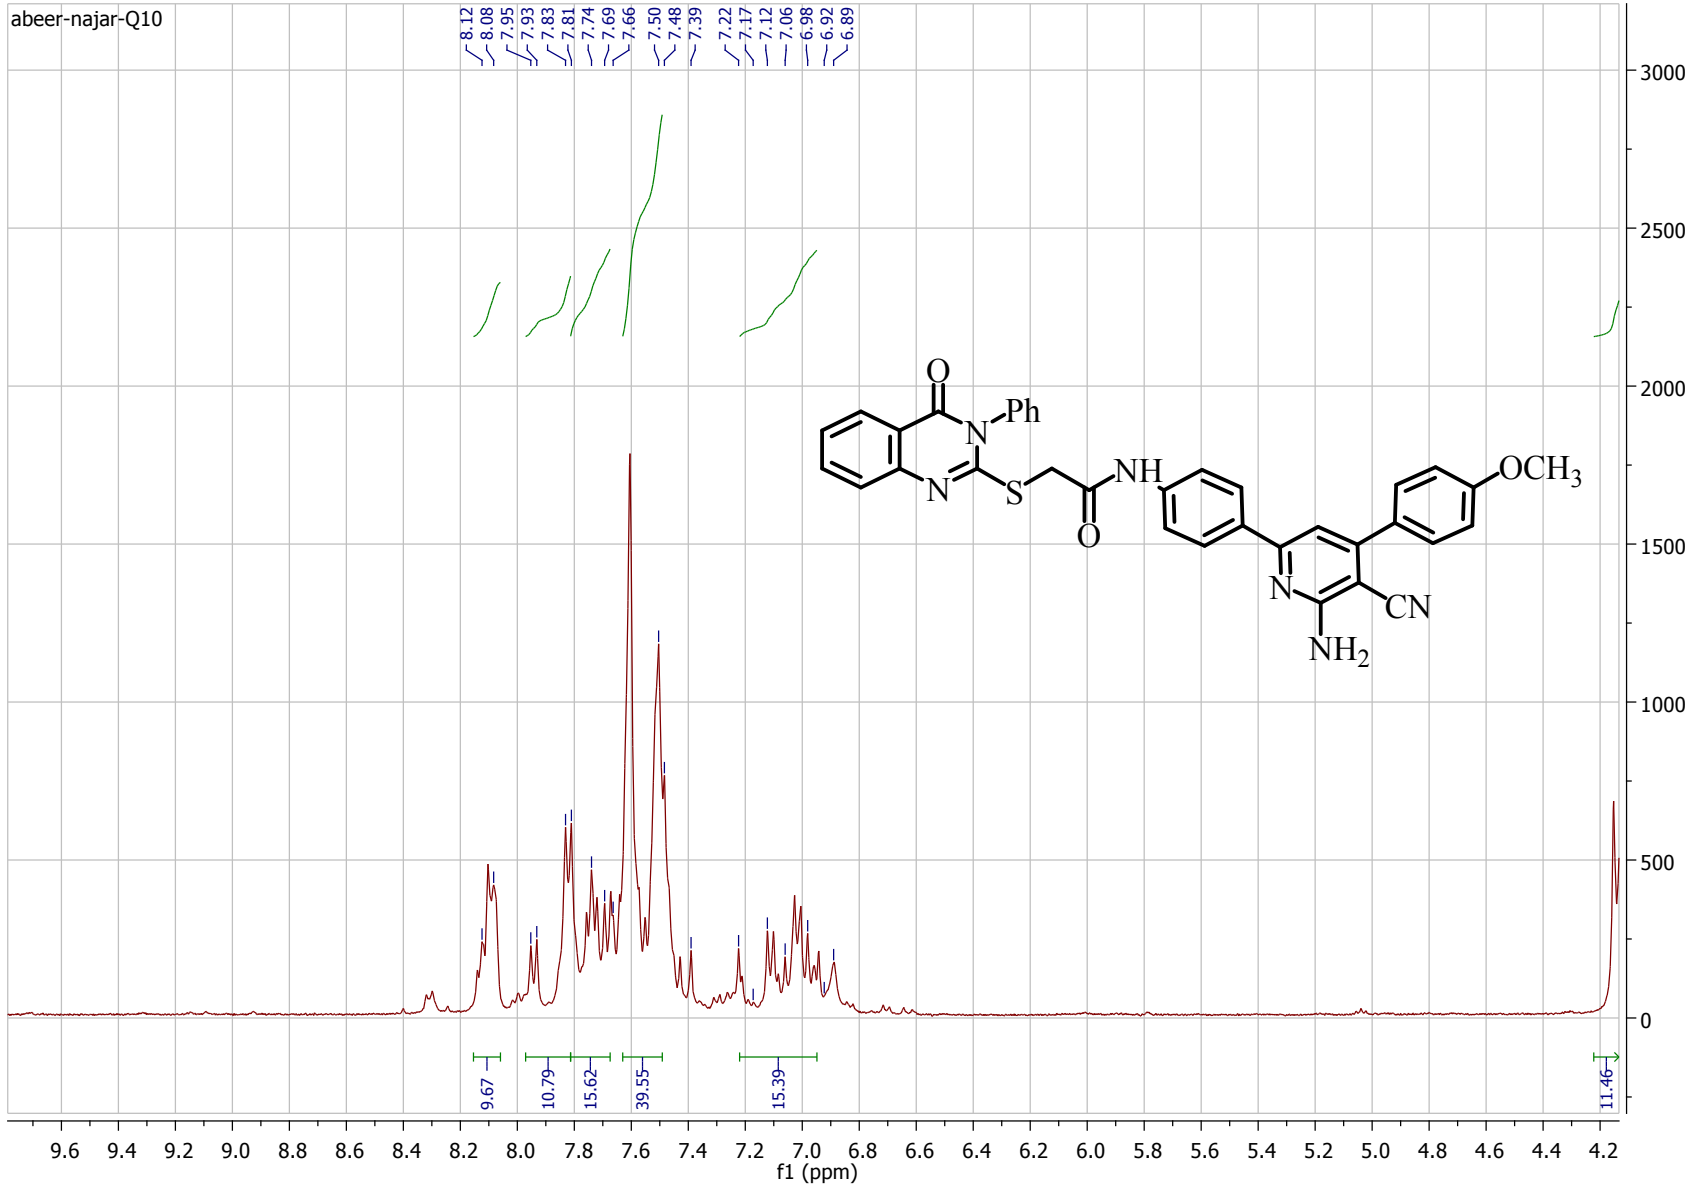

- 8.12
- 8.08
- 7.95
- 7.93
- 7.83
- 7.81
- 7.74
- 7.69
- 7.66
- 7.50
- 7.48
- 7.39
- 7.22
- 7.17
- 7.12
- 7.06
- 6.98
- 6.92
- 6.89

- 9.67
- 10.79
- 15.62
- 39.55
- 15.39
- 11.46

<sup>13</sup>C NMR

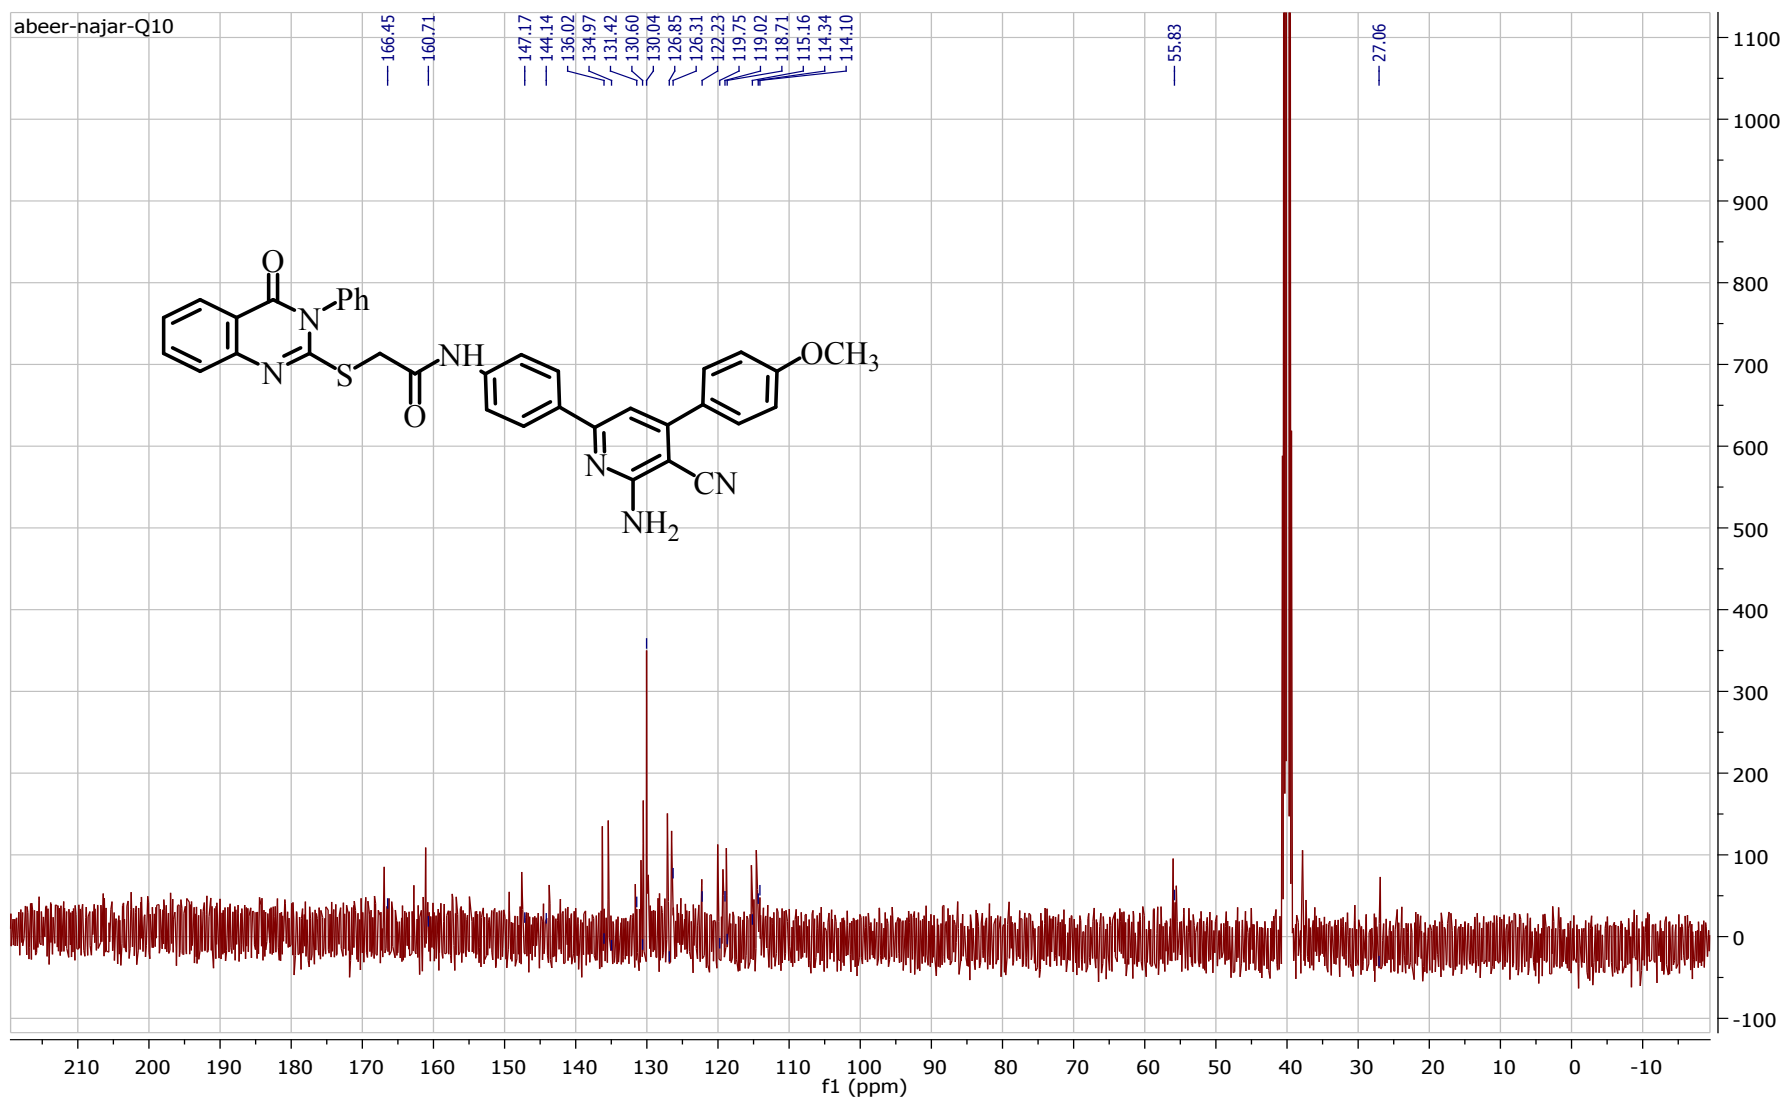

*N*-(4-(6-amino-4-(4-chlorophenyl)-5-cyanopyridin-2-yl)phenyl)-2-((4-oxo-3-phenyl-3,4-dihydroquinazolin-2-yl)thio)acetamide (8b).

IR

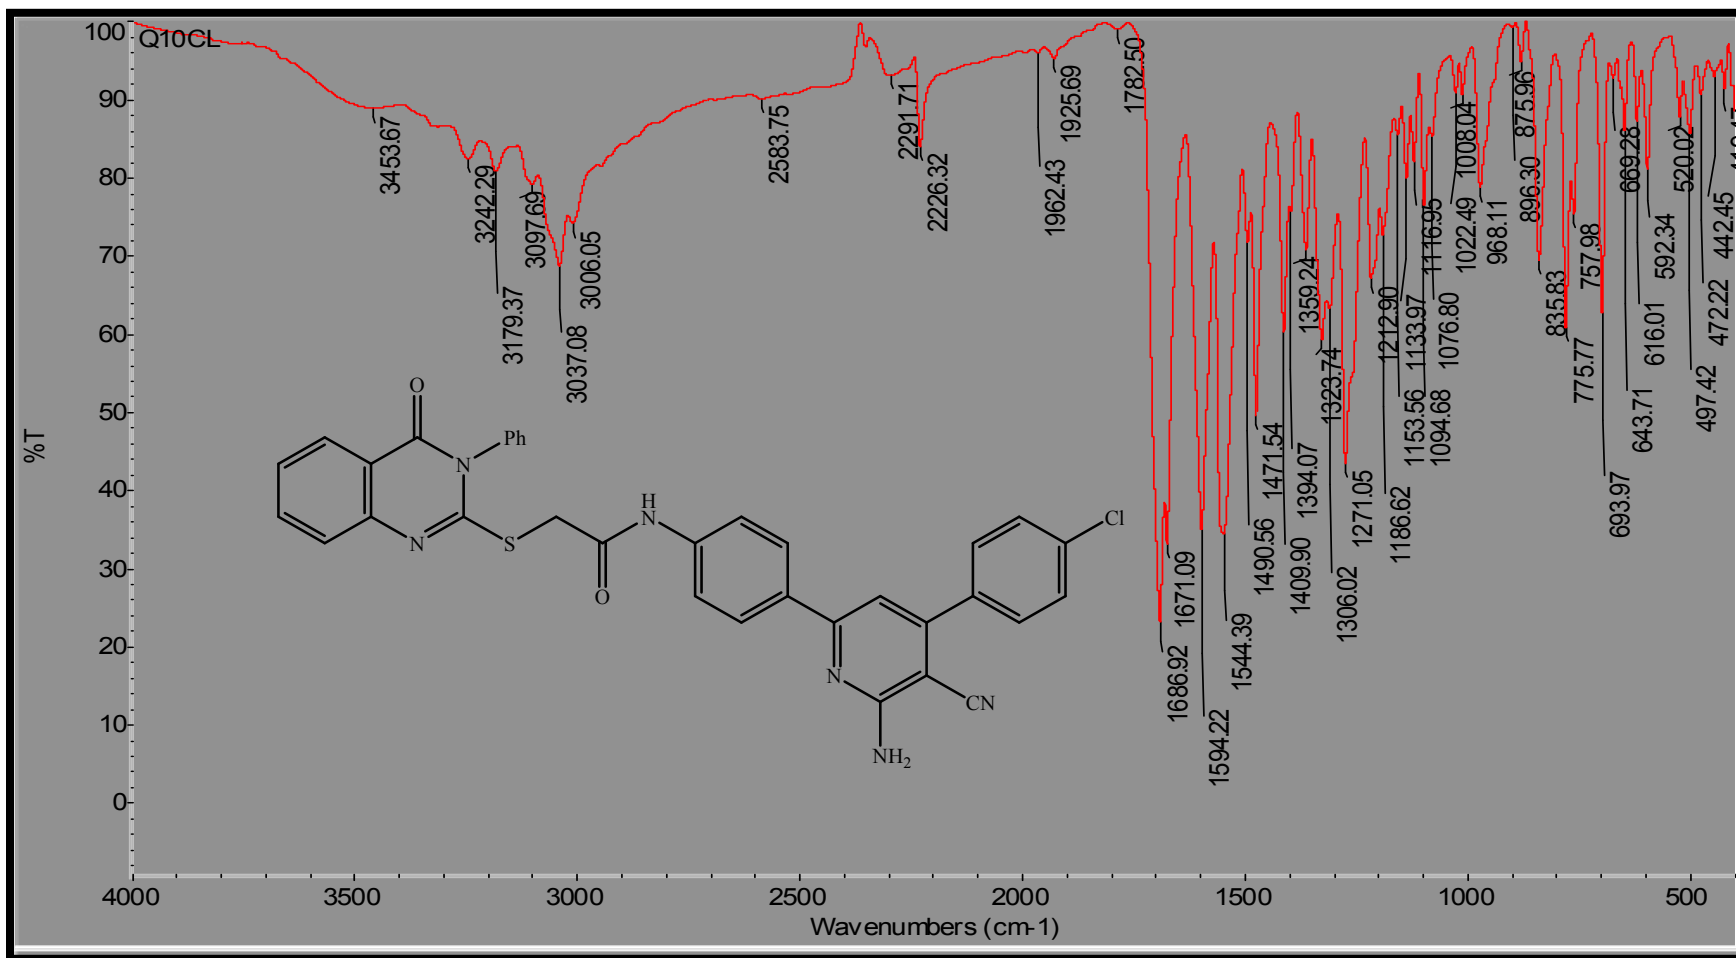



# HNMR

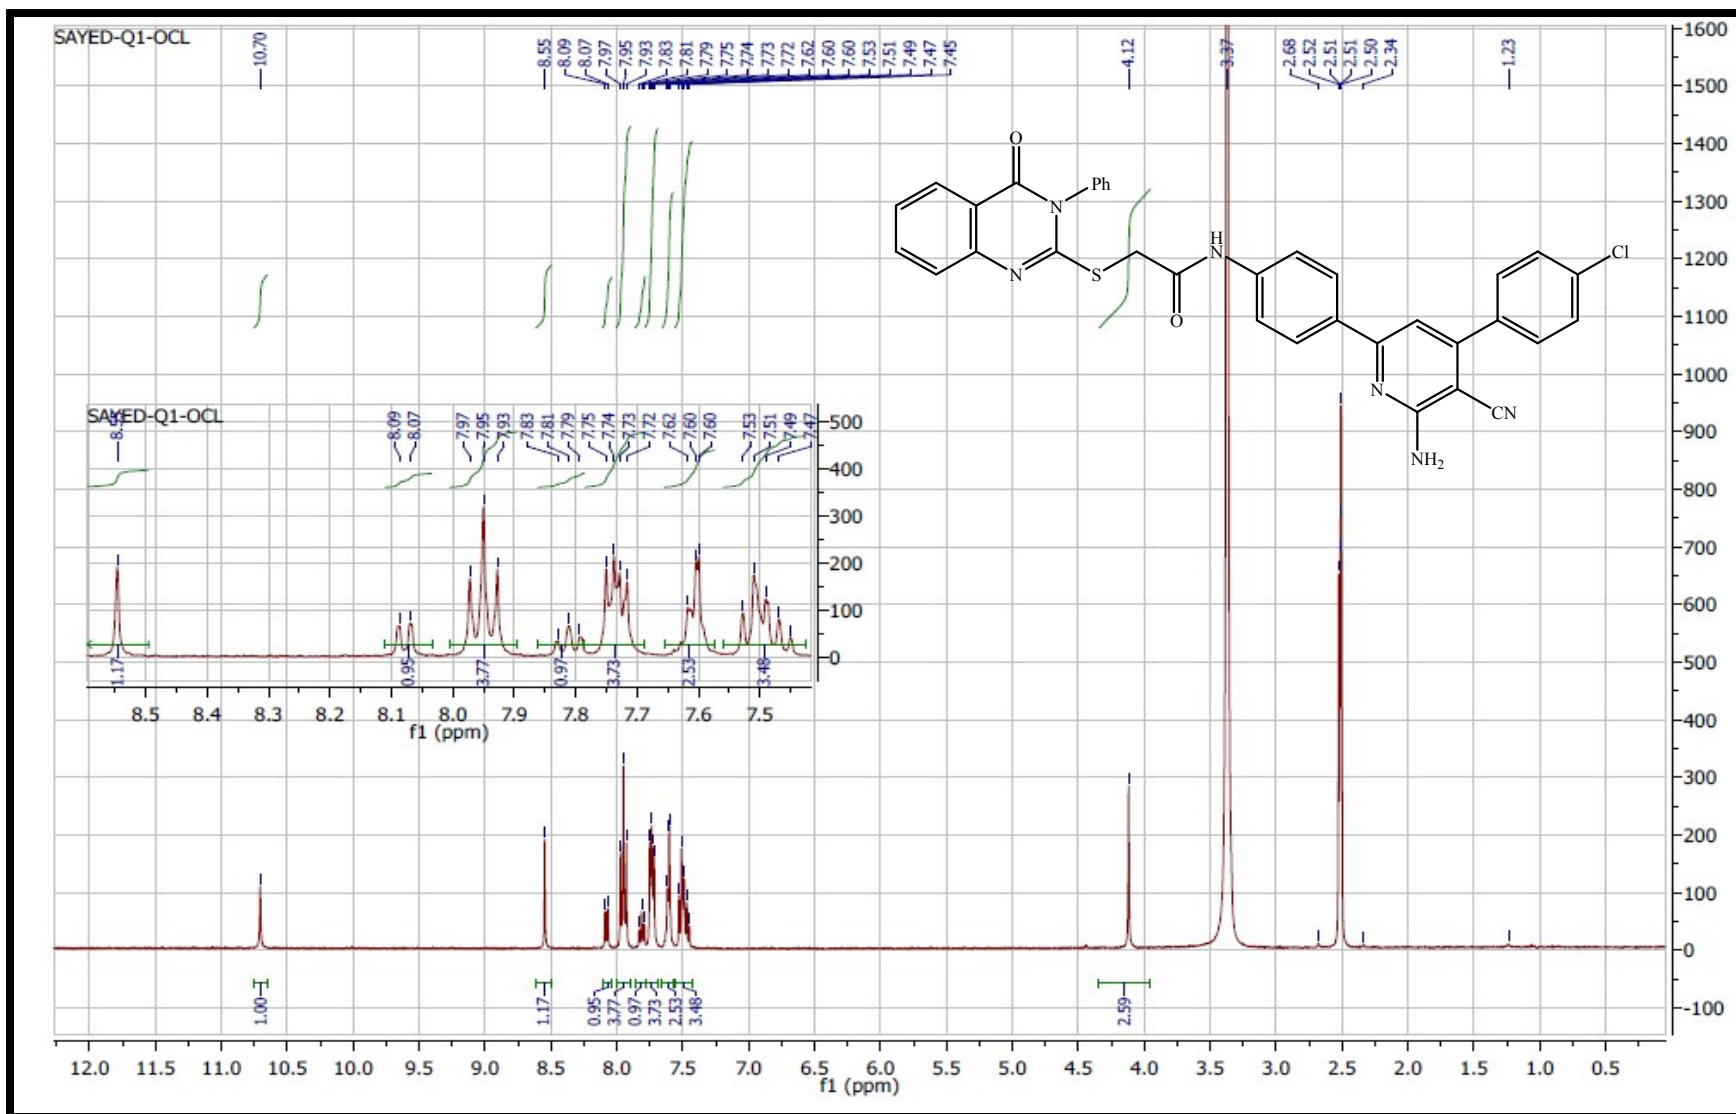

# Mass

sayed-karam-Q10-CL #207 RT: 3.48 AV: 1 SB: 2 4.54 , 4.54 NL: 4.42E2  
T: {0,0} + c EI Full ms [40.00-1000.00]

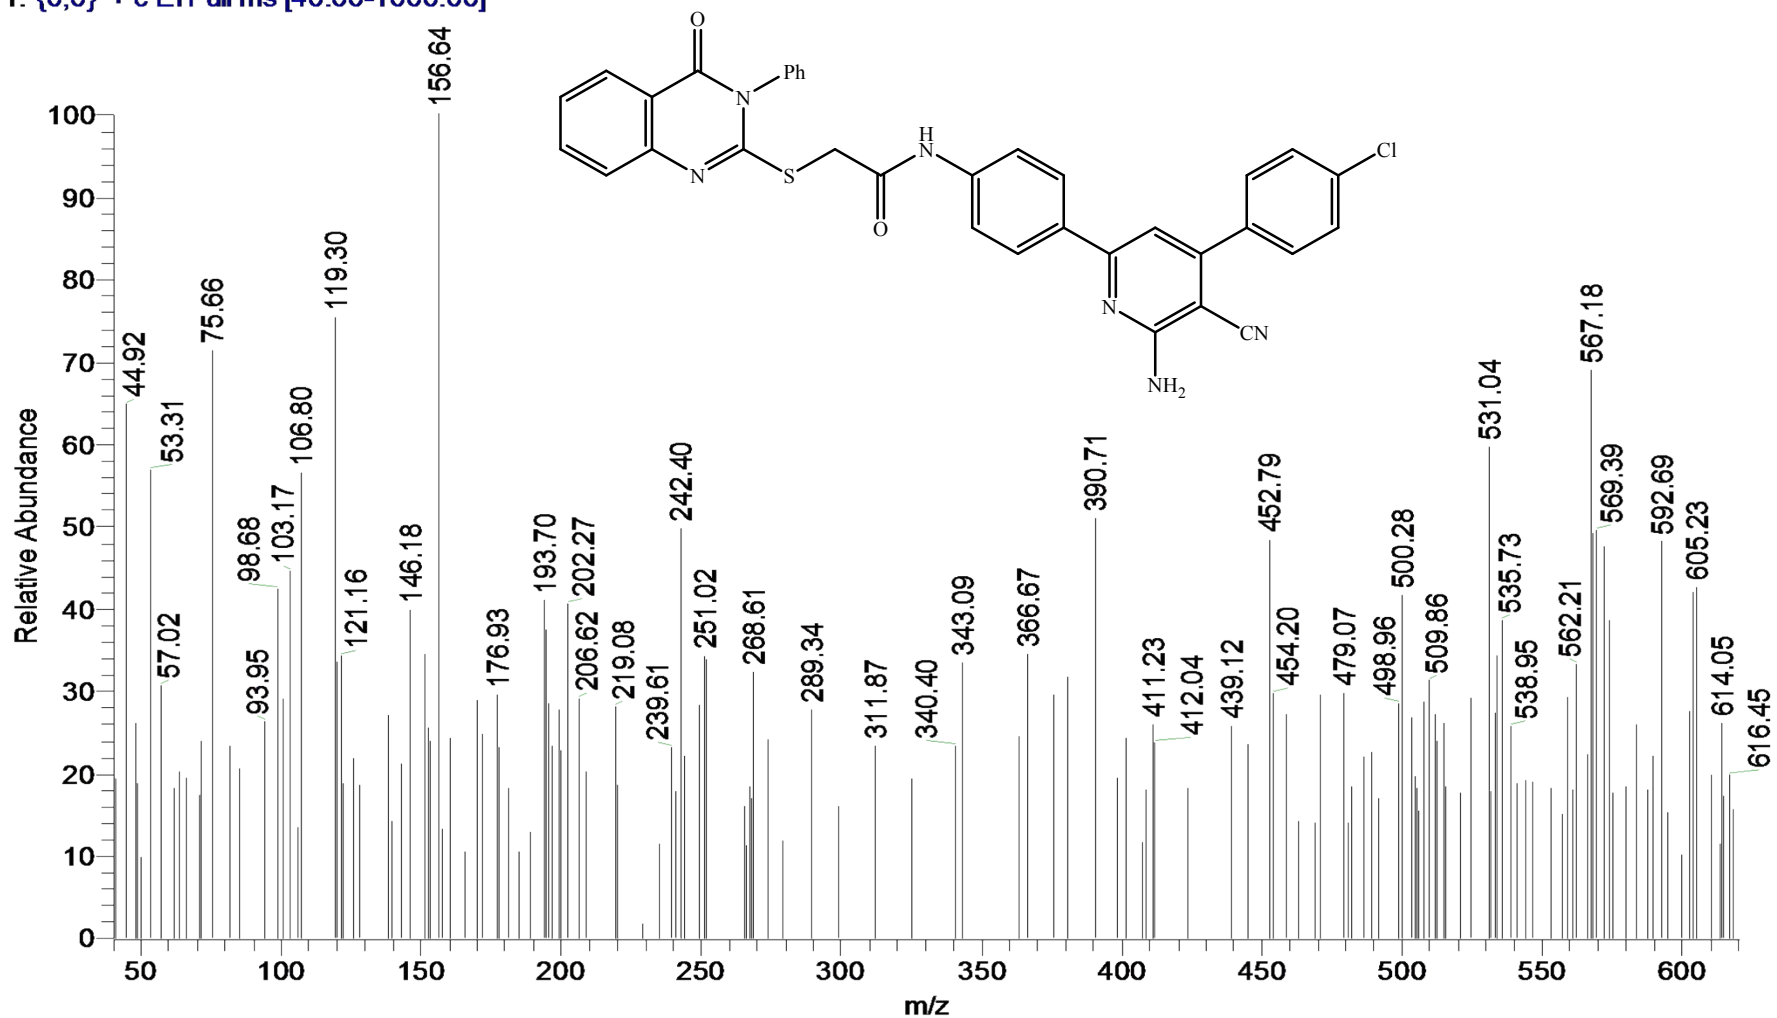

*N*-(4-(6-amino-5-cyano-4-(4-nitrophenyl)pyridin-2-yl)phenyl)-2-((4-oxo-3-phenyl-3,4-dihydroquinazolin-2-yl)thio)acetamide (8c).

IR

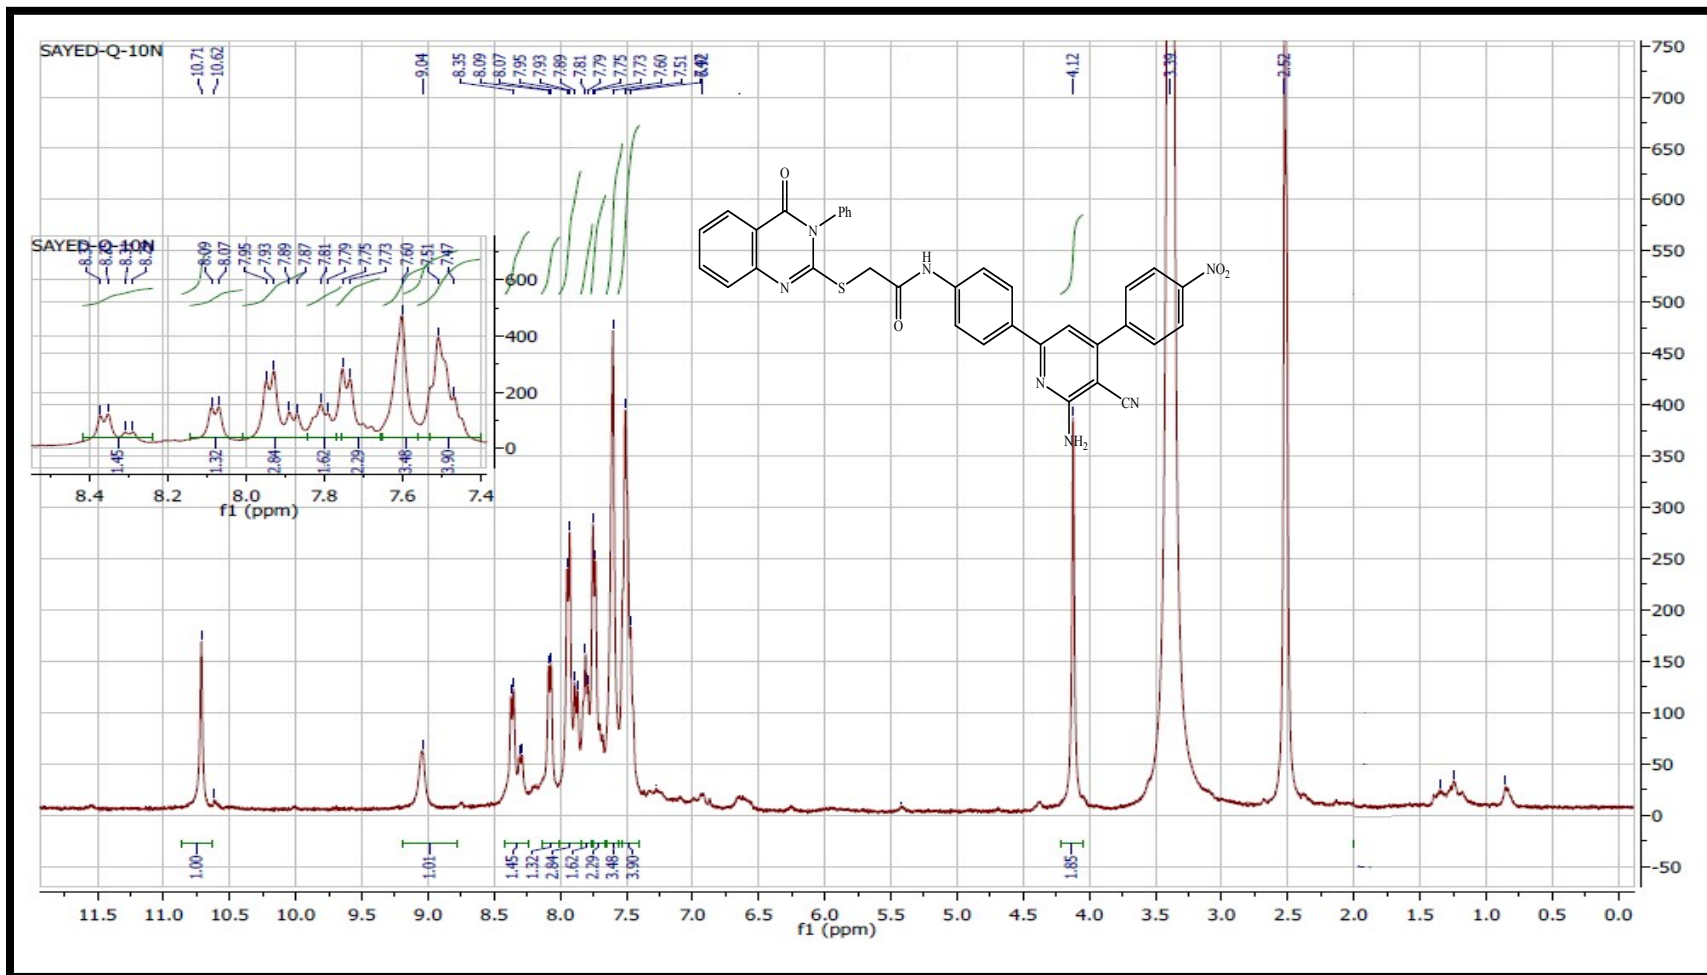

# HNMR

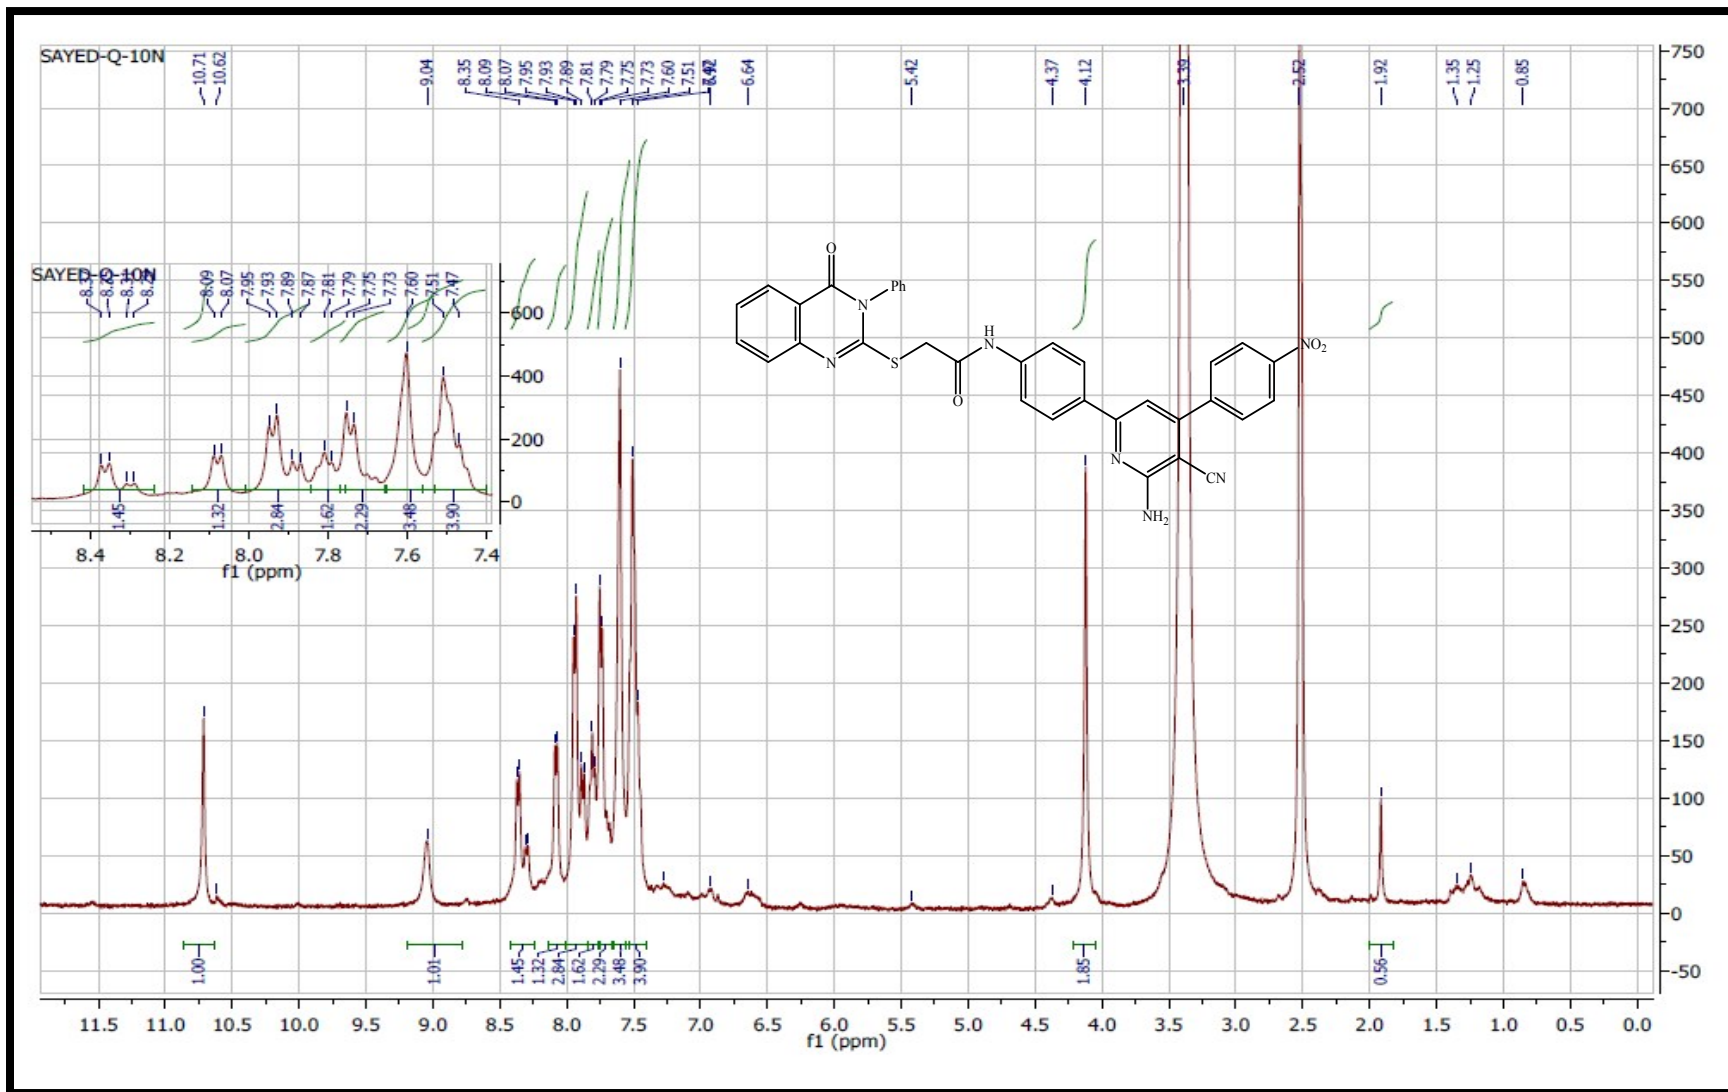

<sup>13</sup>C NMR

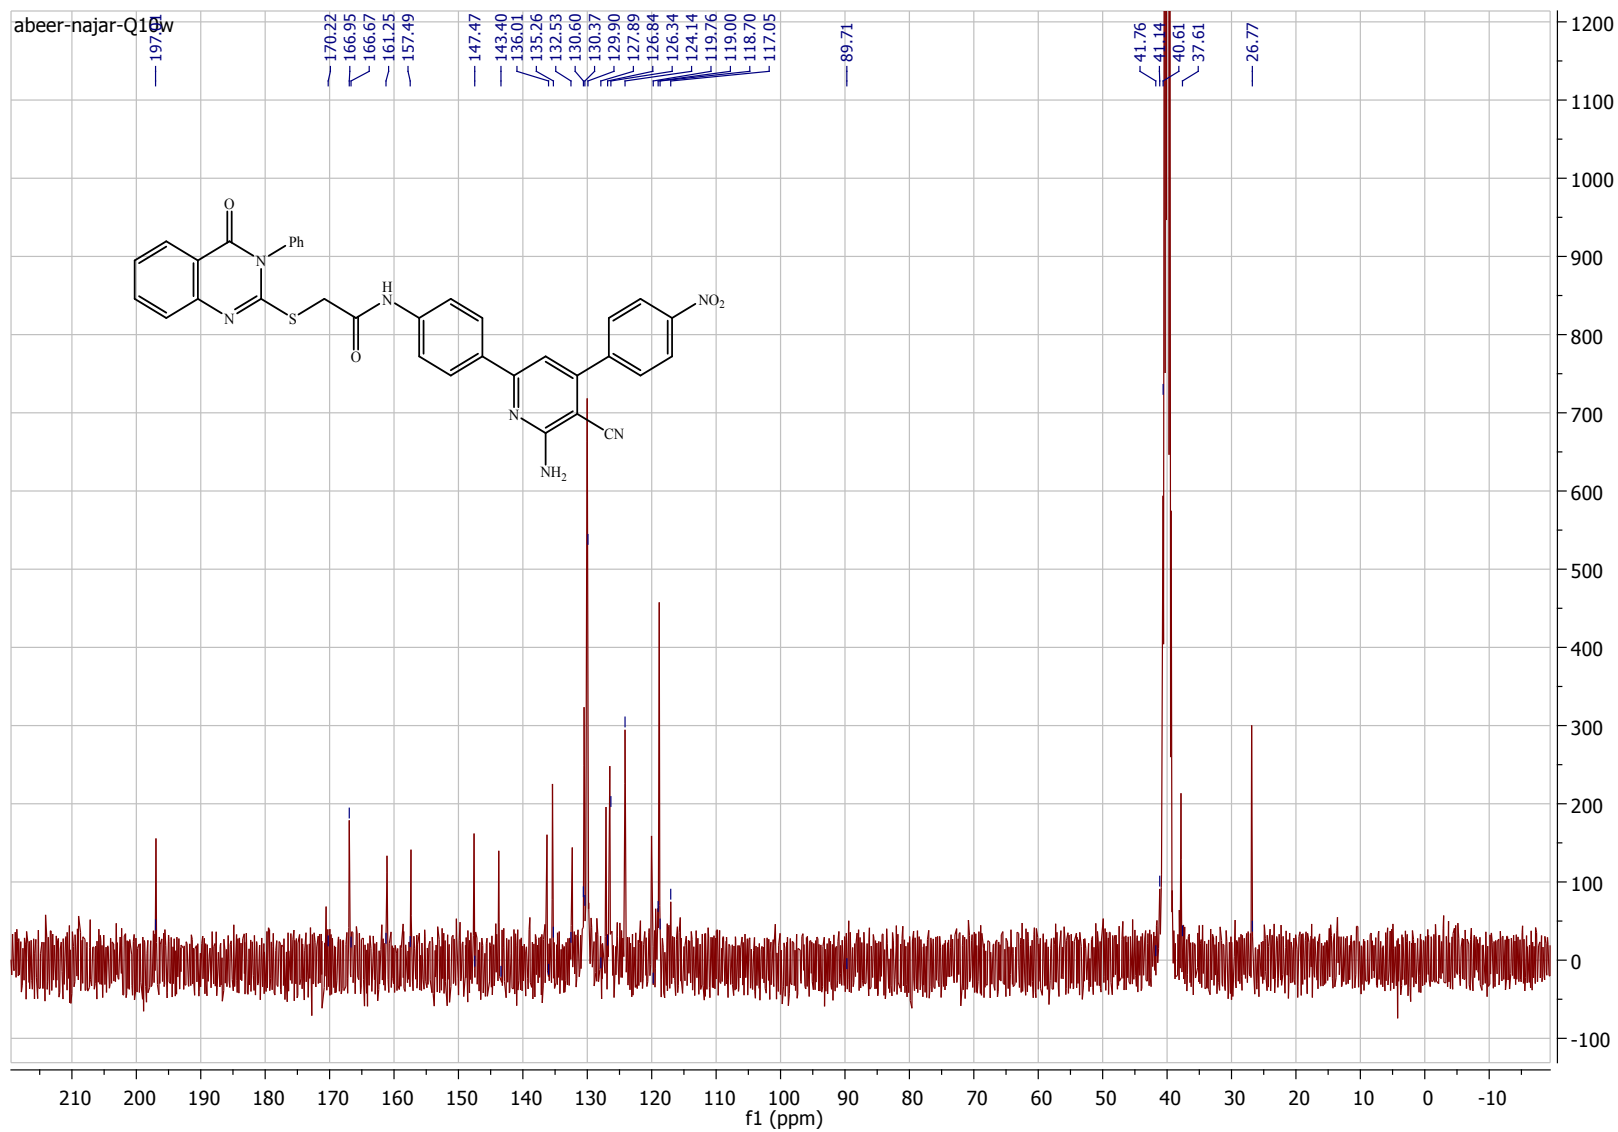

*N*-(4-(3-(4-methoxyphenyl)acryloyl)phenyl)-2-((4-oxo-3-phenyl-3,4-dihydroquinazolin-2-yl)thio)acetamide (9a).

IR

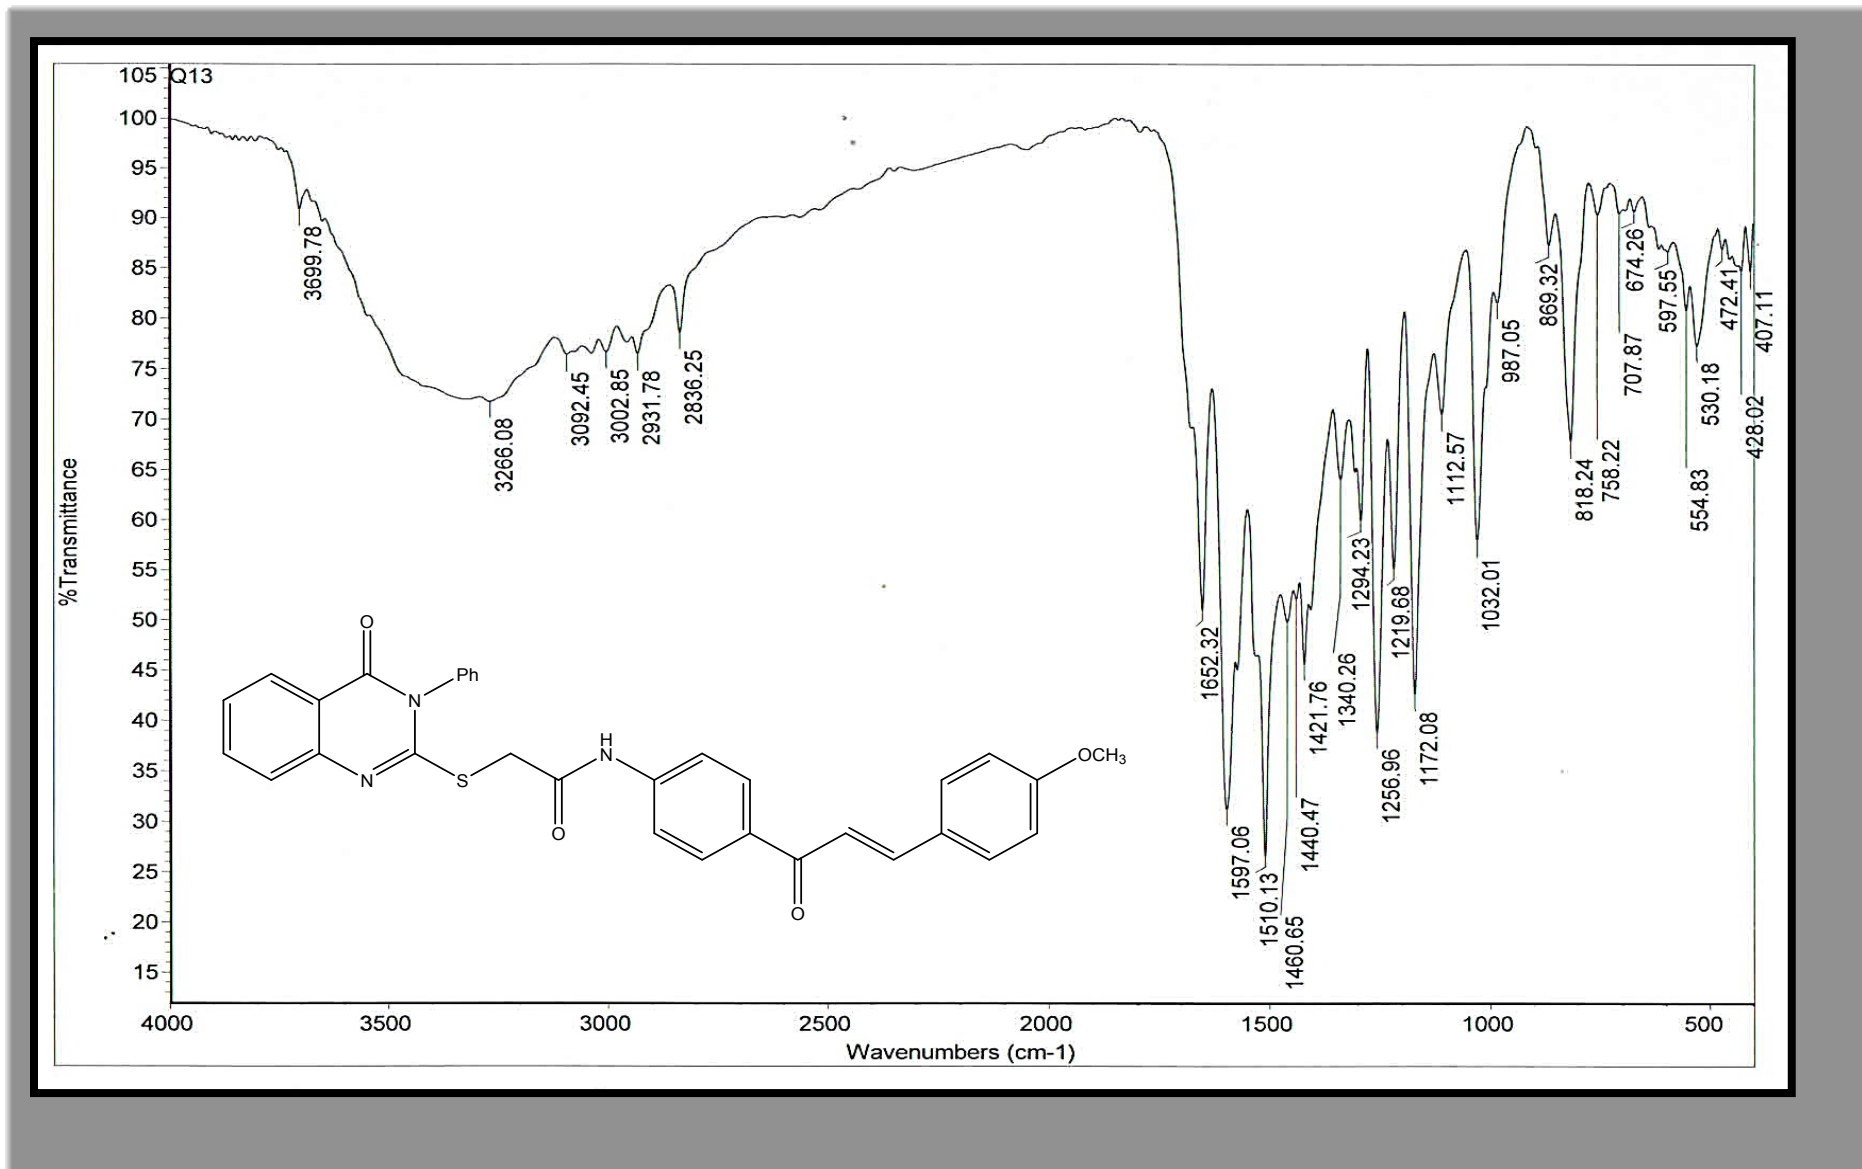

# HNMR

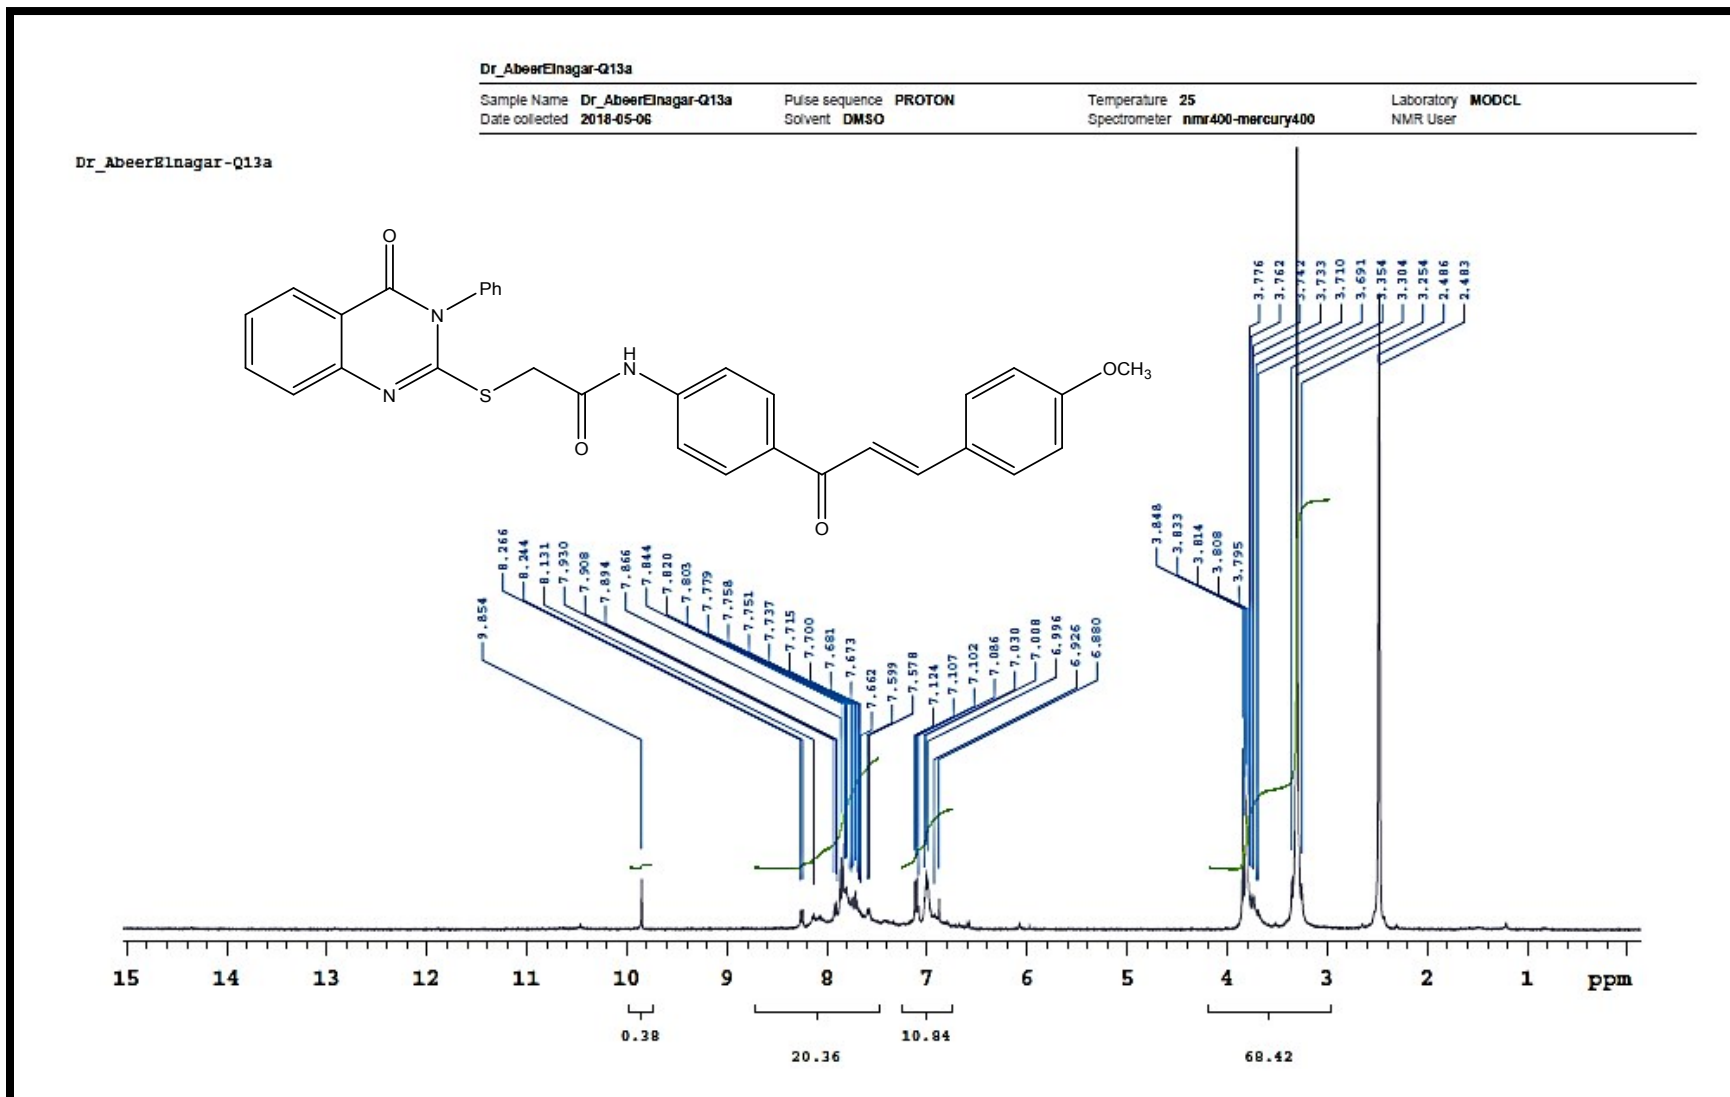

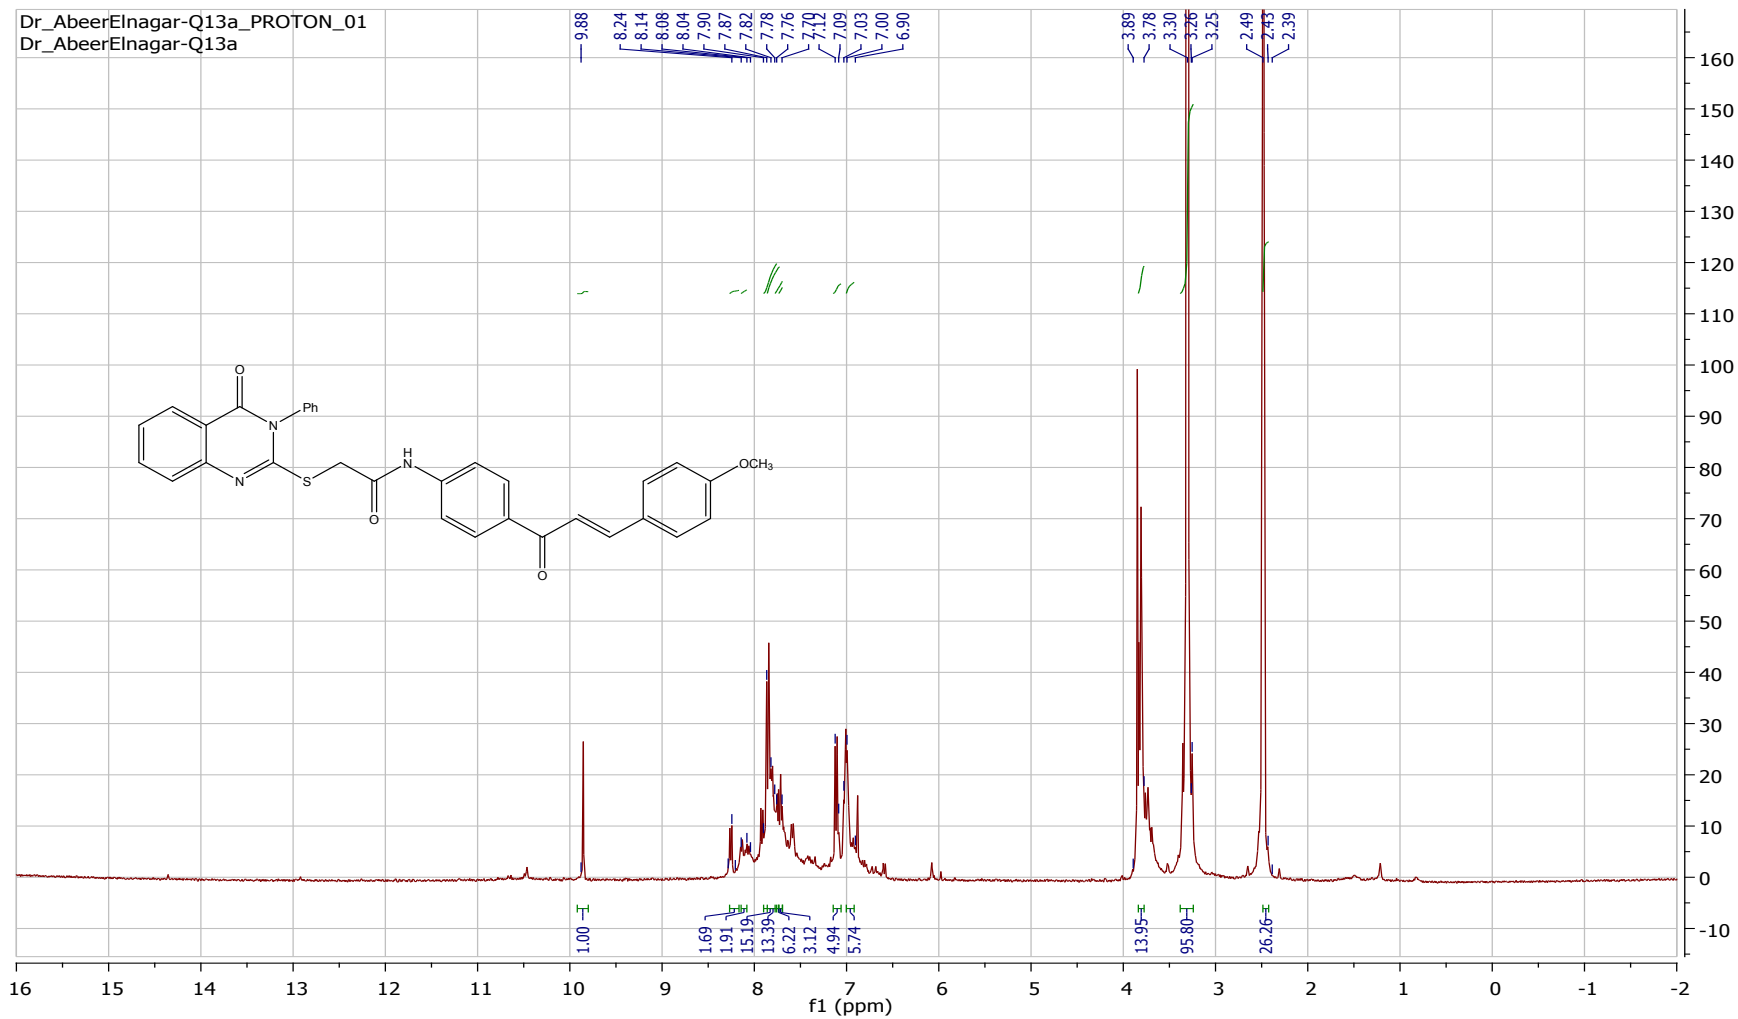



*N*-(4-(3-(4-chlorophenyl)acryloyl)phenyl)-2-((4-oxo-3-phenyl-3,4-dihydroquinazolin-2-yl)thio)acetamide (9b).

IR

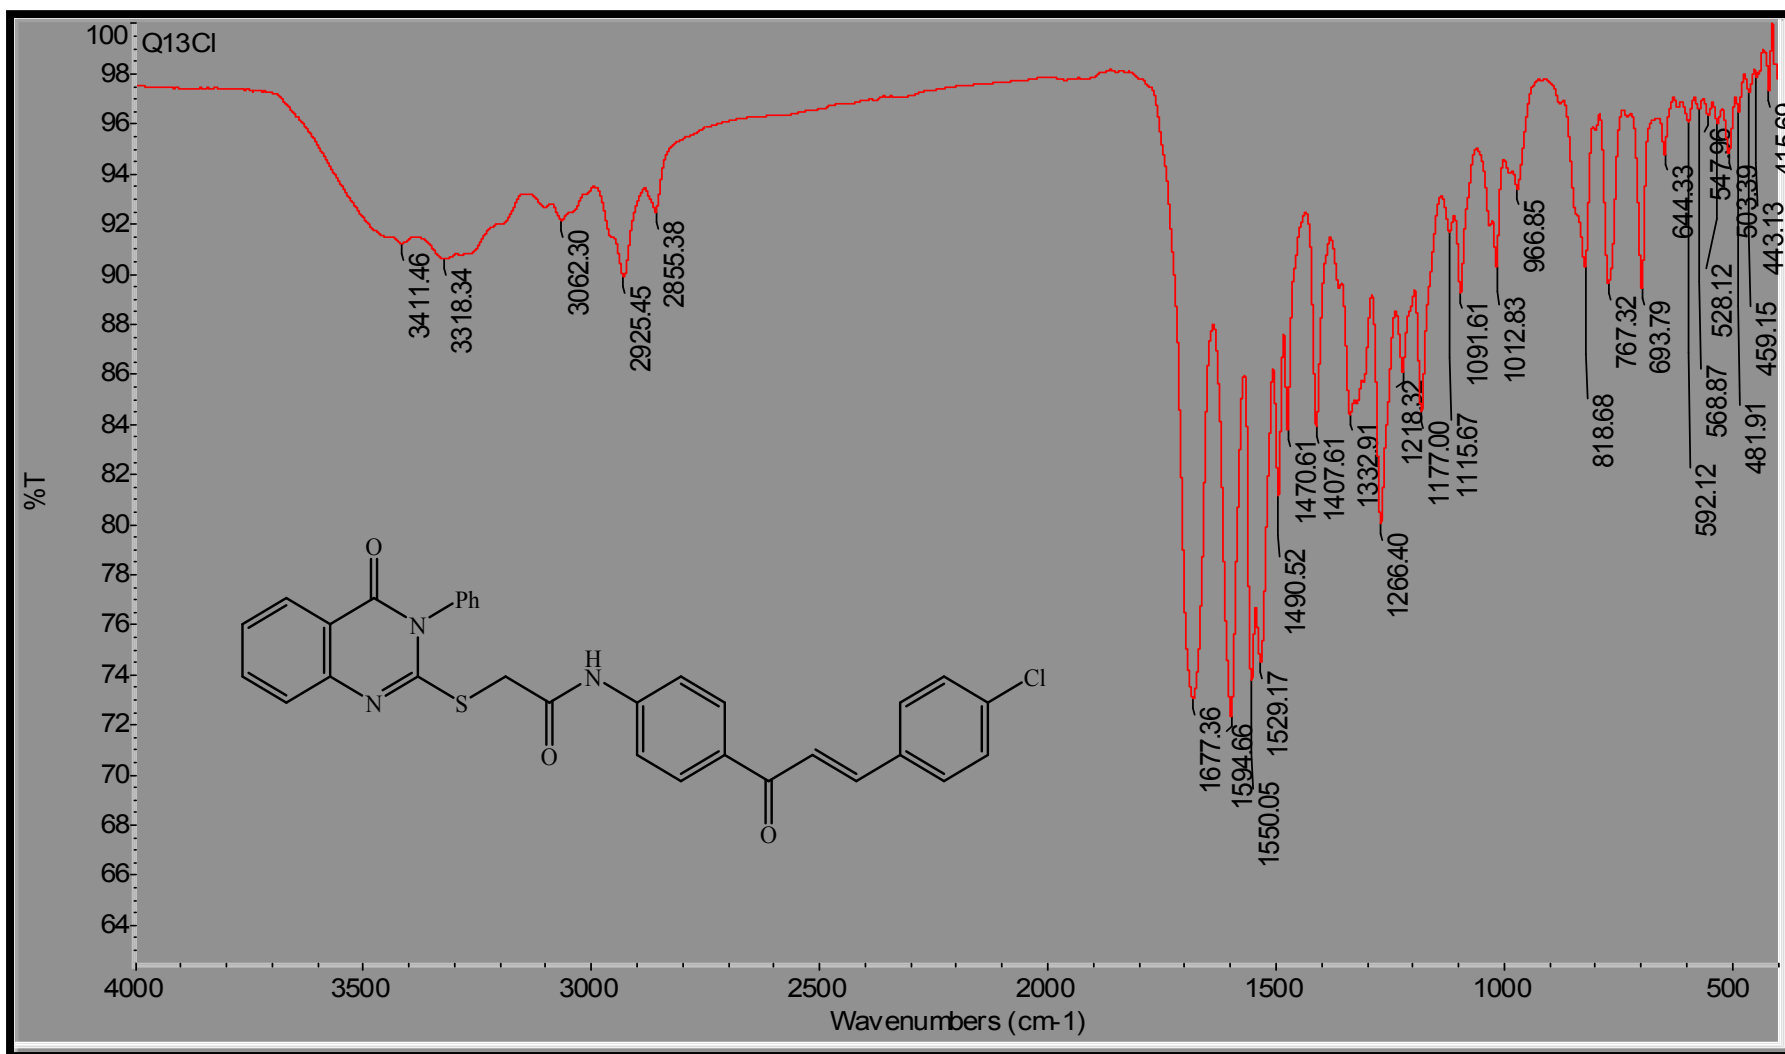

# HNMR

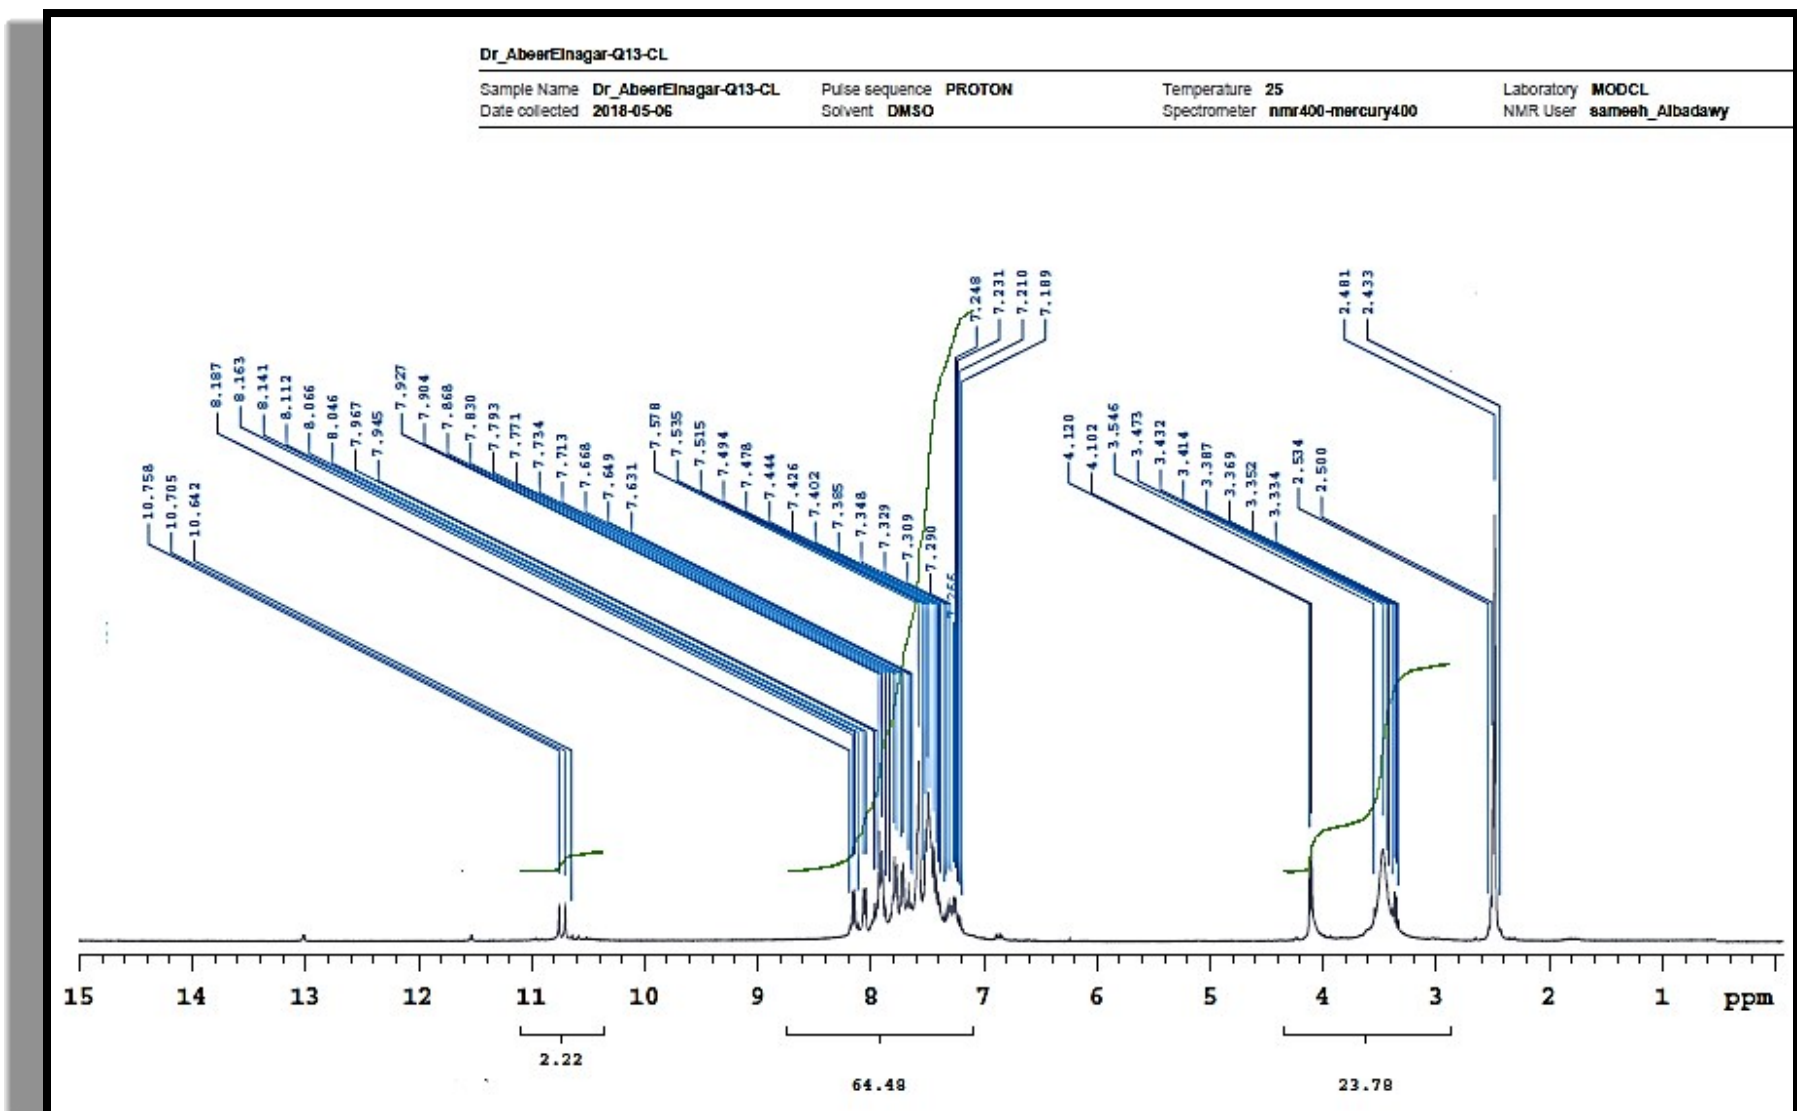

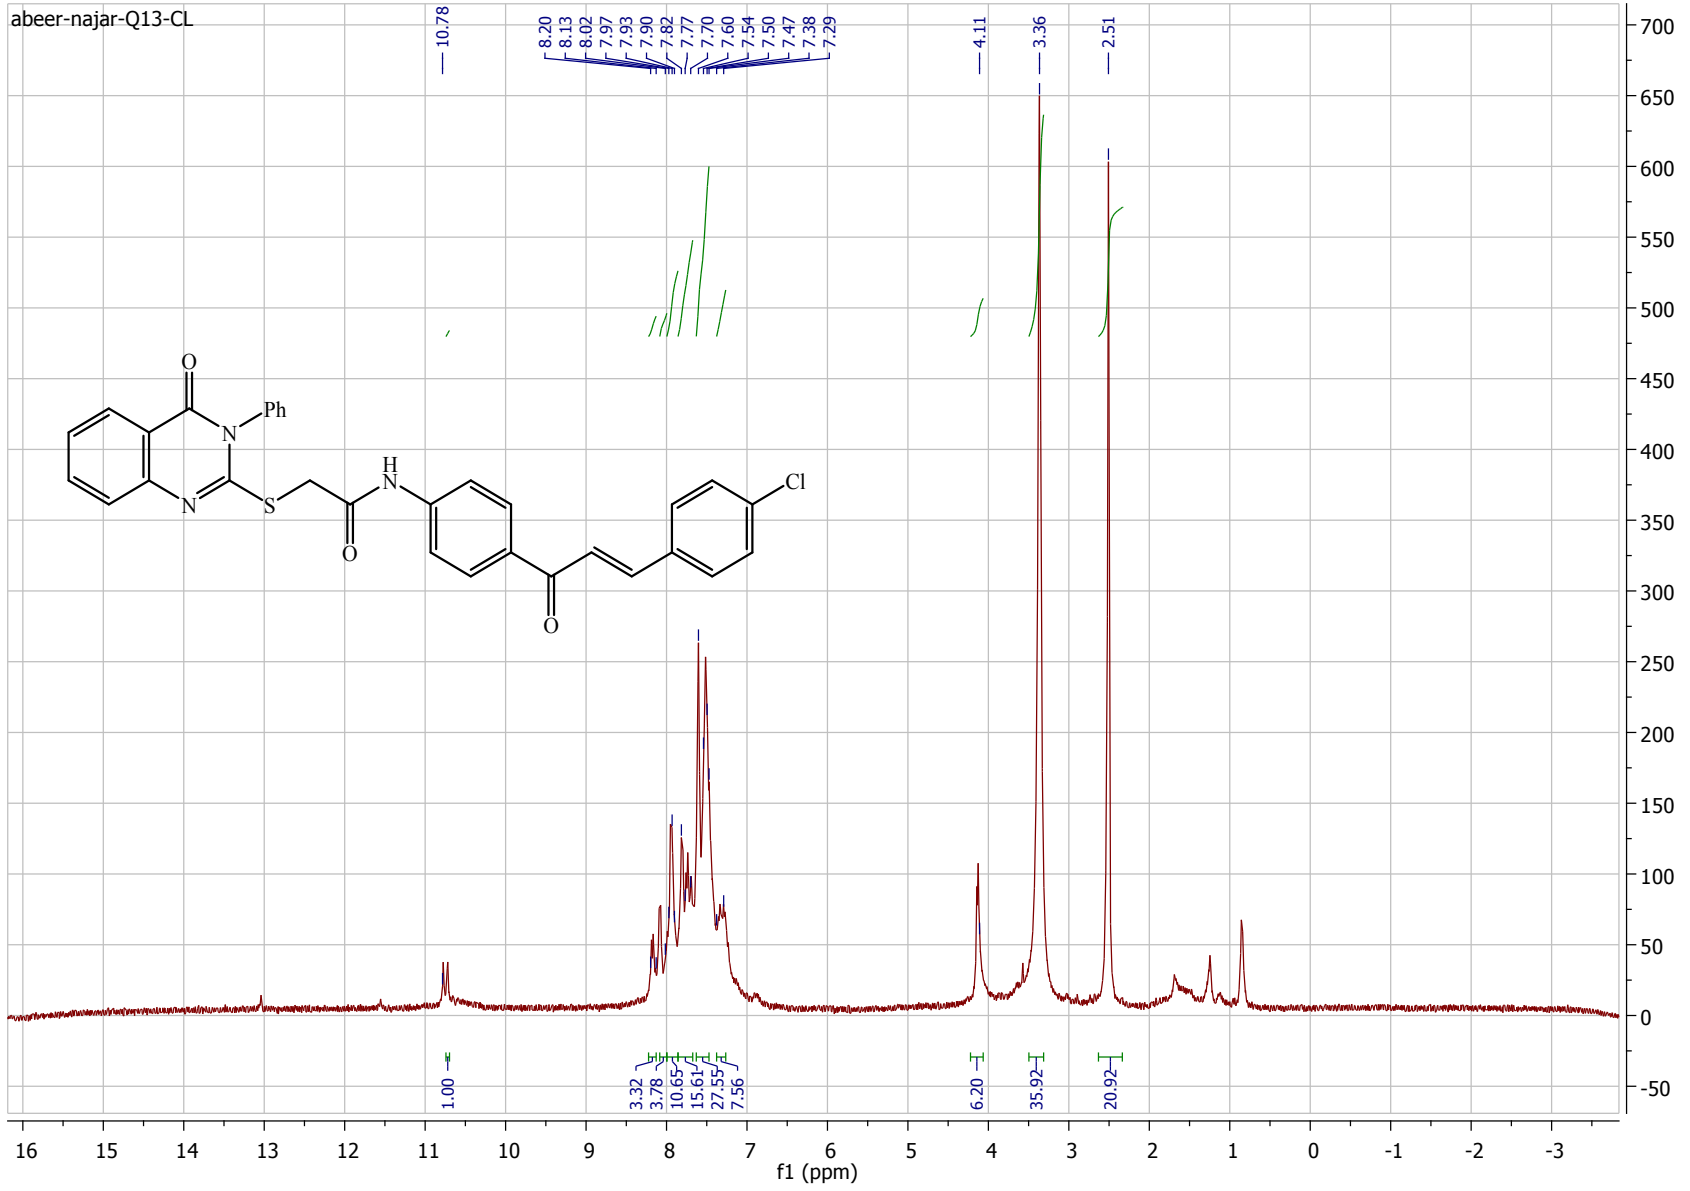

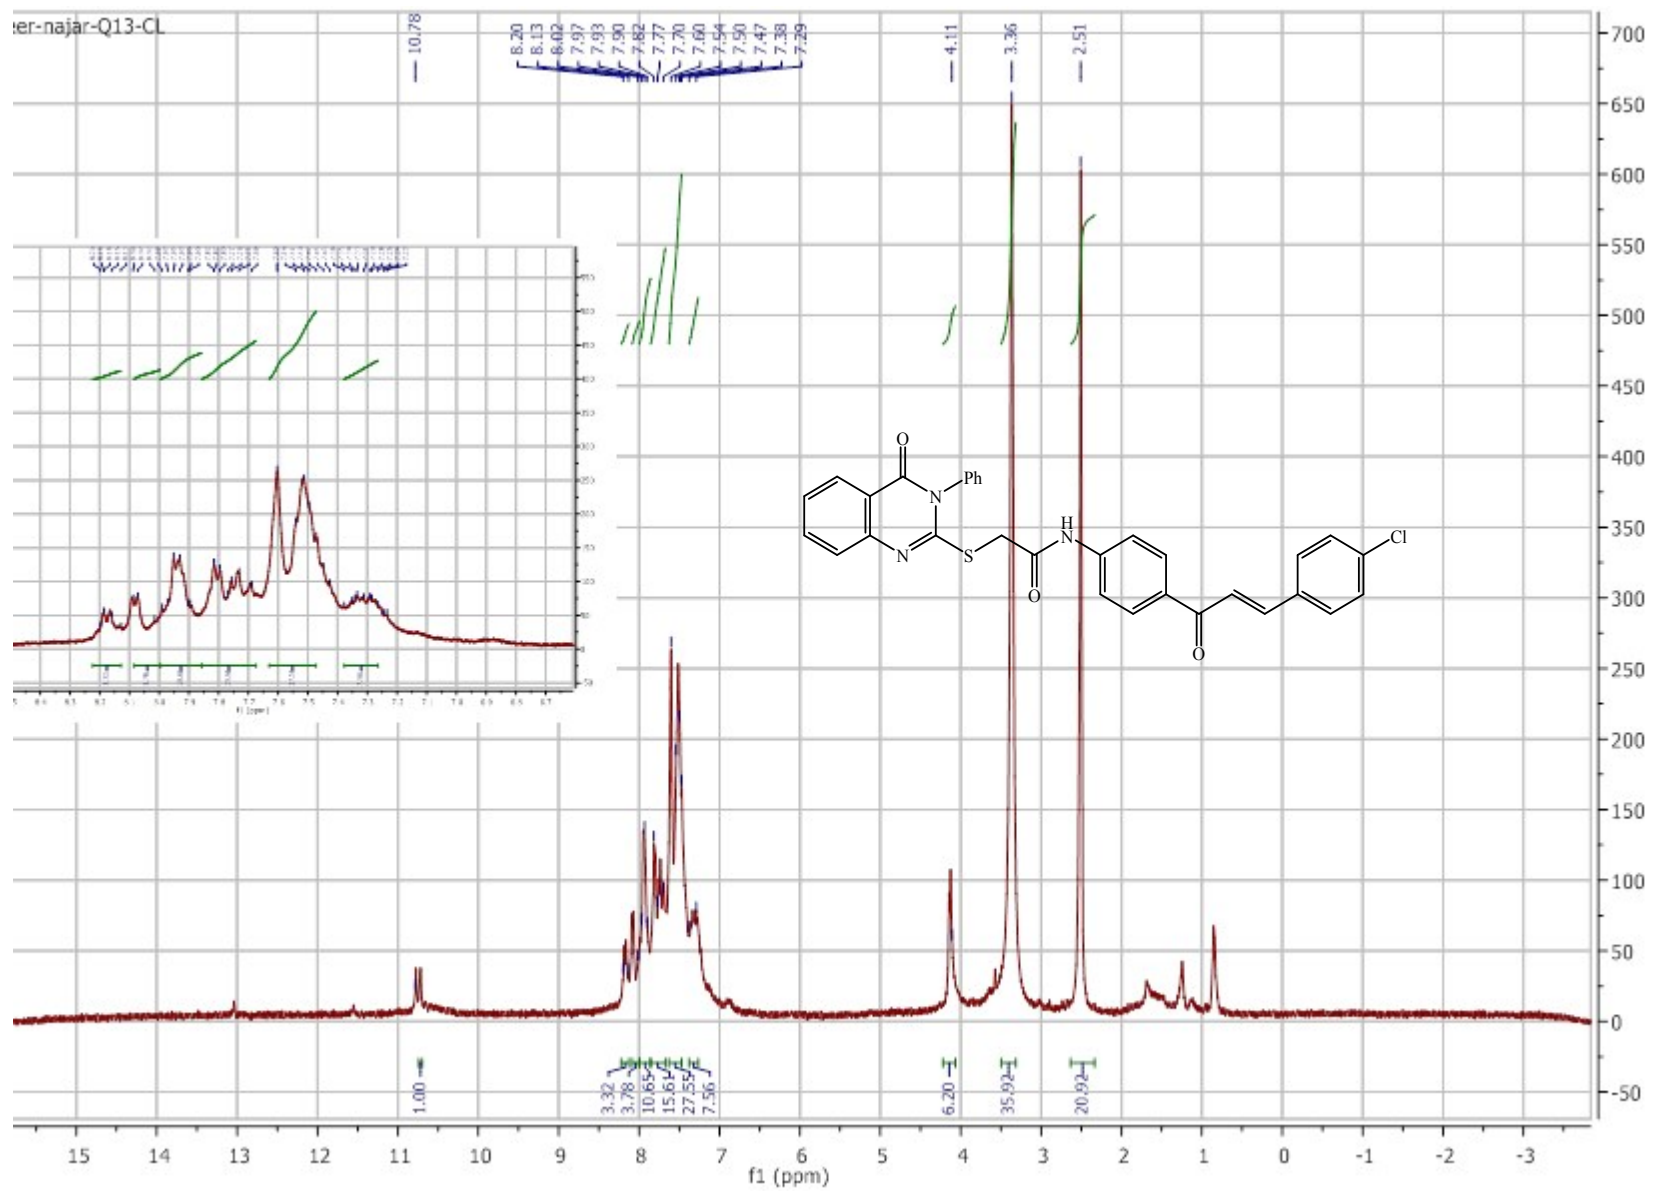

abeer-najar-Q13-CL

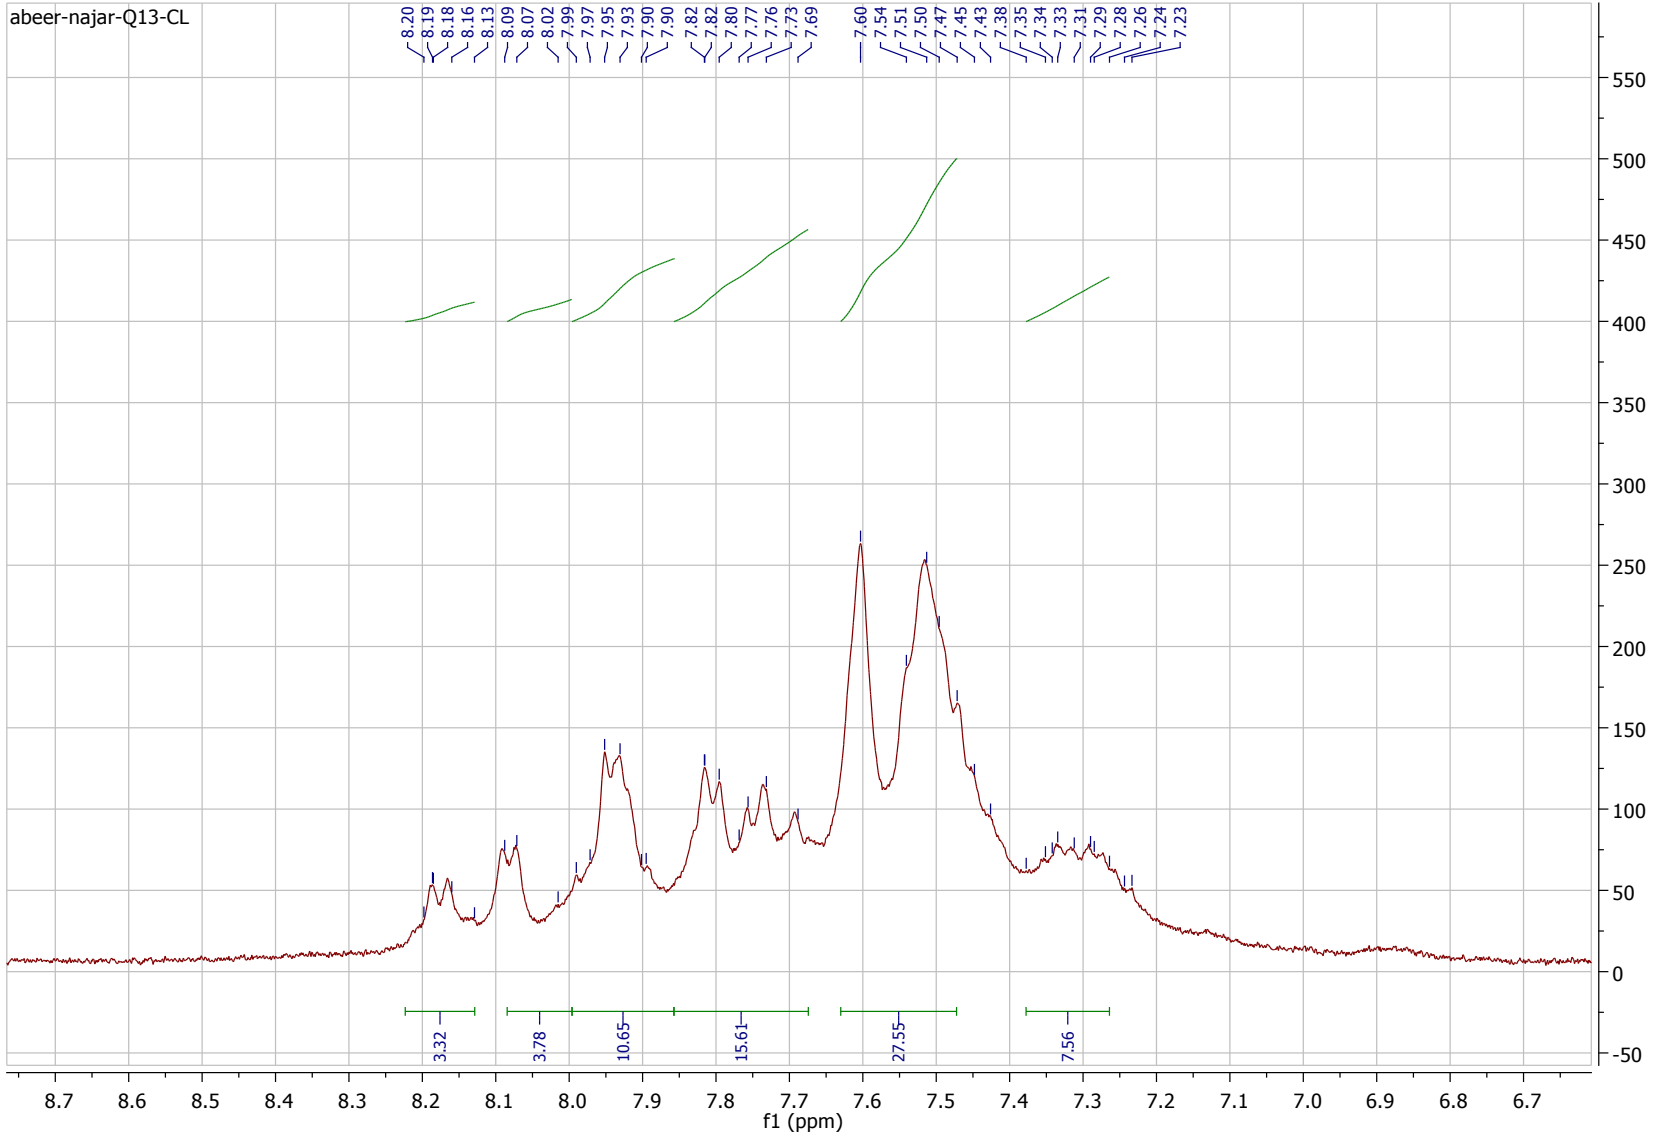

Mass

sayed-karam-Q13CL #172 RT: 2.90 AV: 1 SB: 2 4.55 , 4.59 NL: 3.14E2  
T: {0,0} + c EI Full ms [40.00-1000.00]

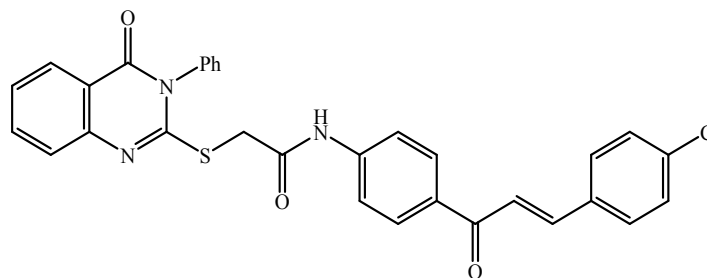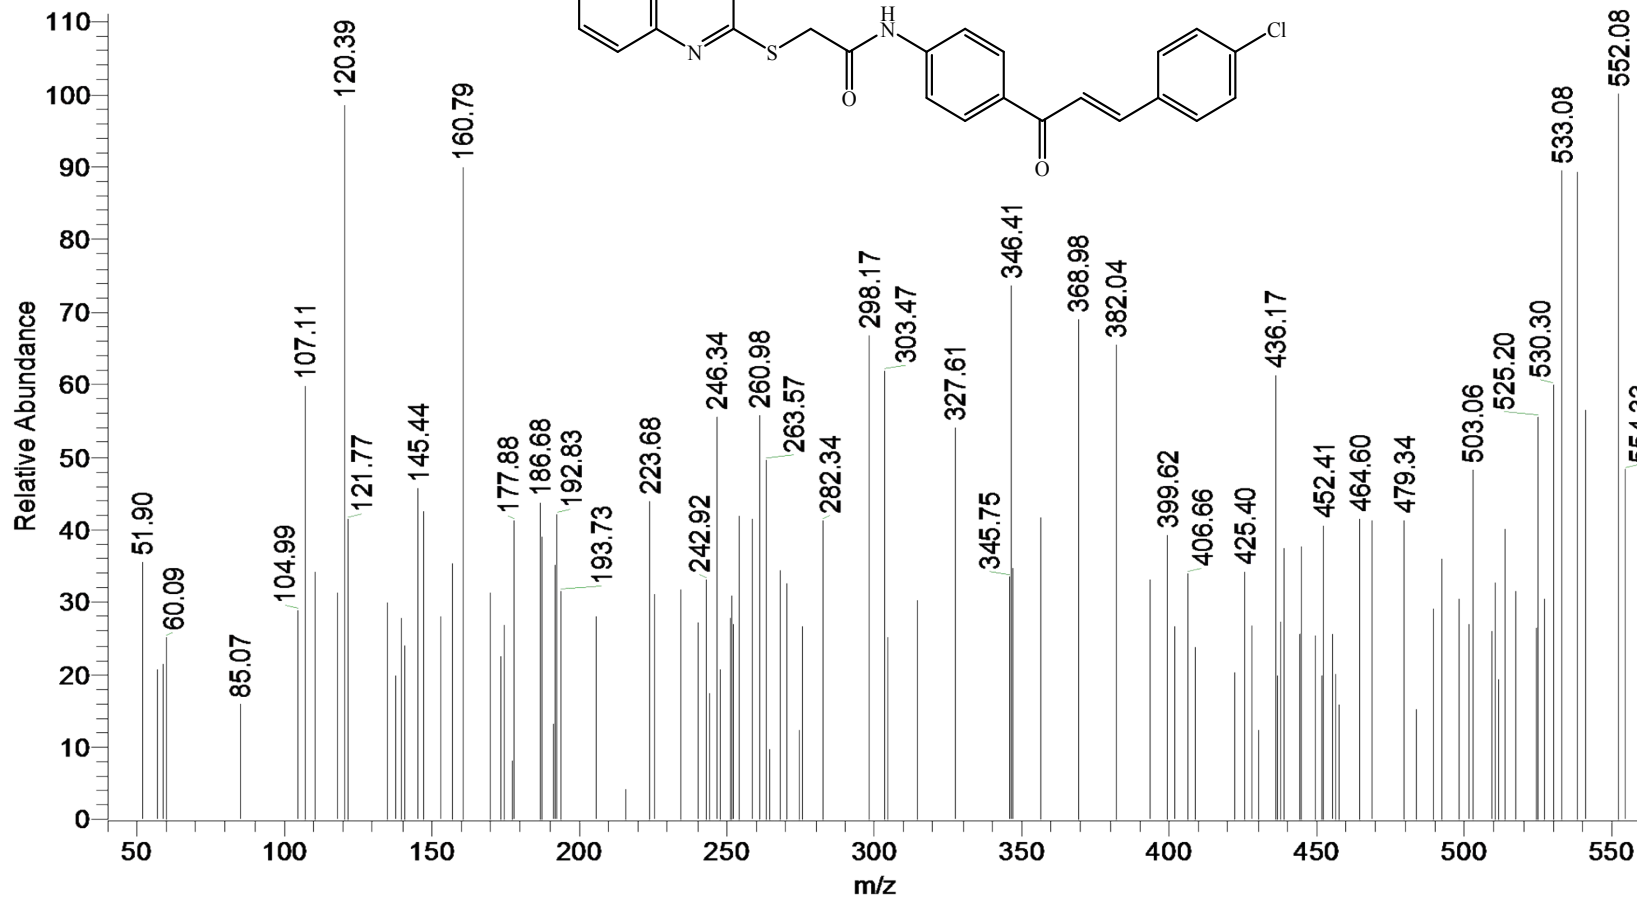

*N*-(4-(3-(4-nitrophenyl)acryloyl)phenyl)-2-((4-oxo-3-phenyl-3,4-dihydroquinazolin-2-yl)thio)acetamide (9c).

**HNMR**

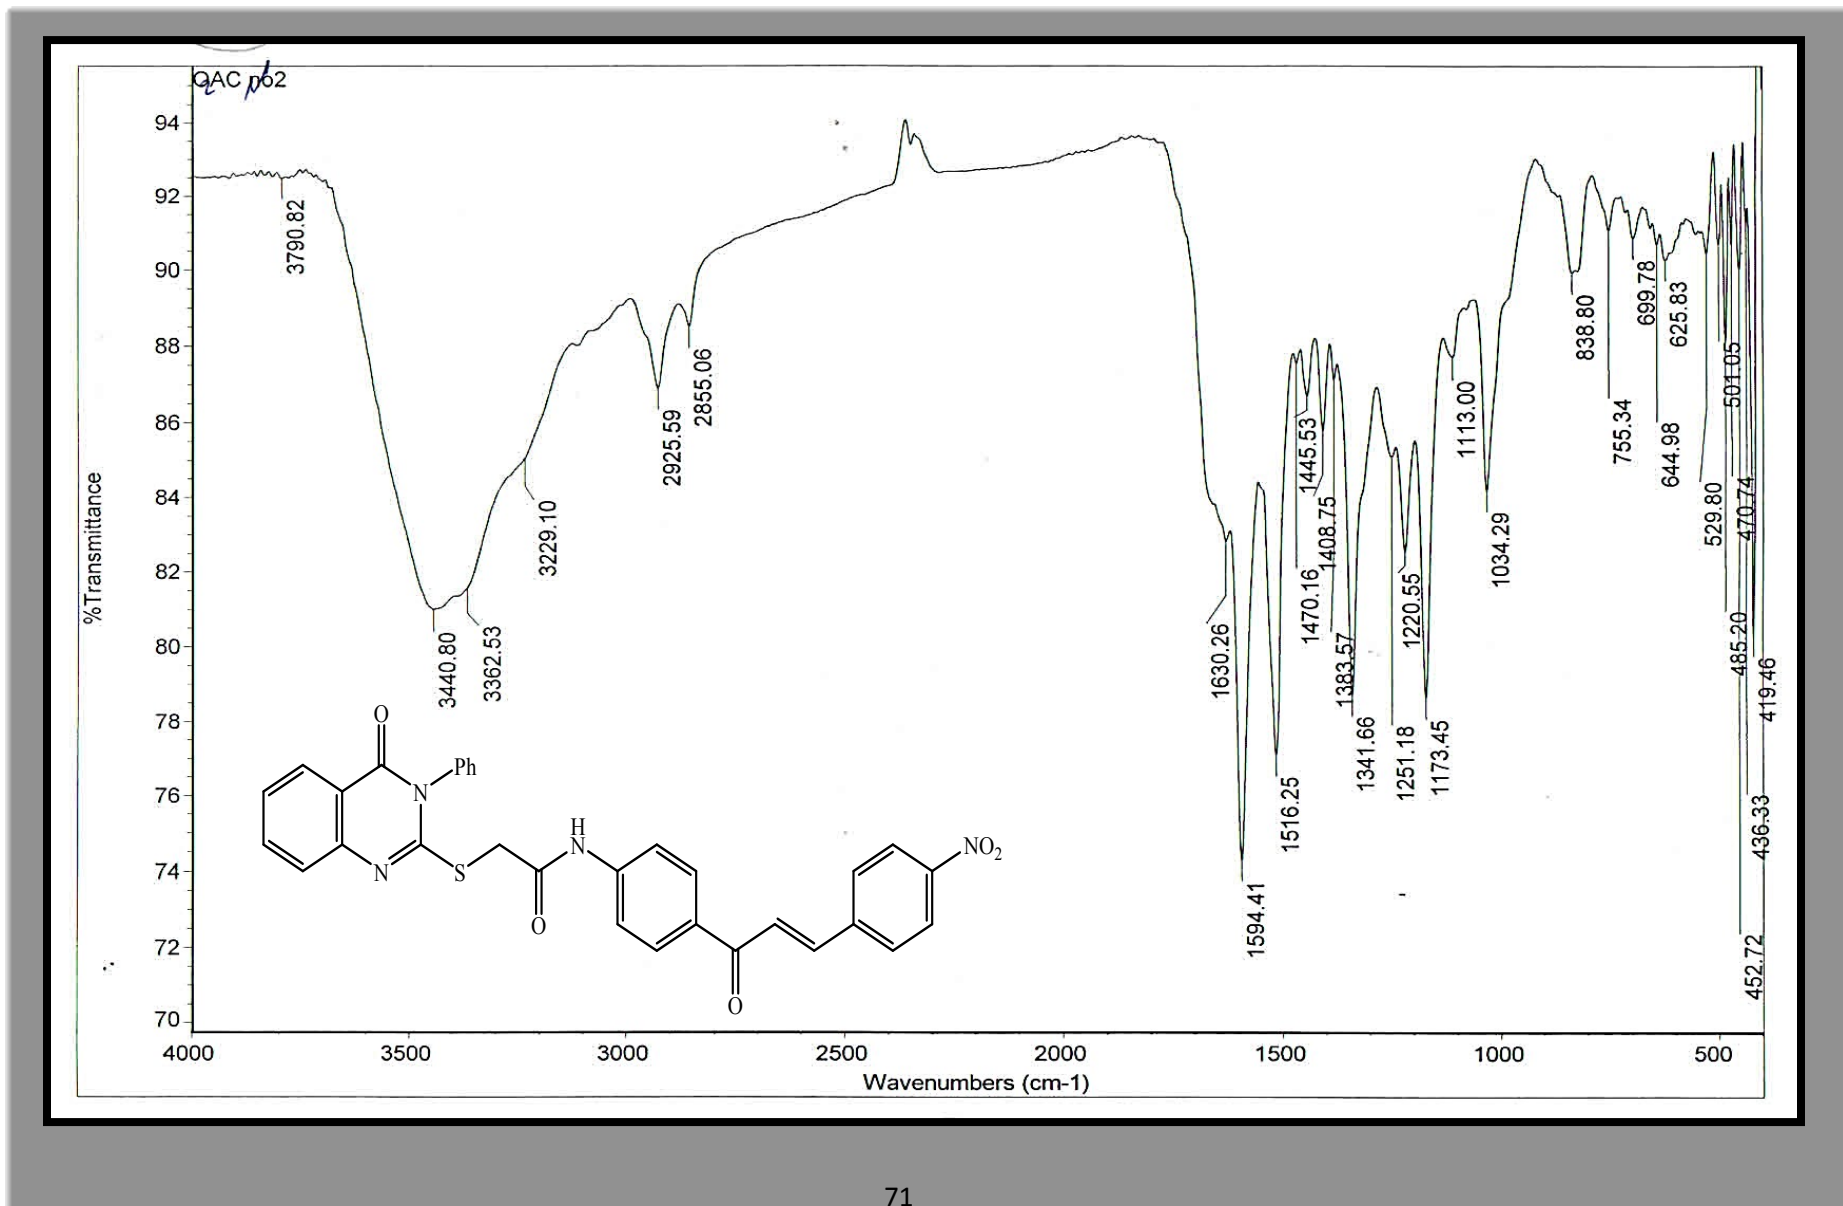

DR\_AbeerElnagar-q13N

Sample Name DR\_AbeerElnagar-q13N  
Date collected 2018-07-12

Pulse sequence PROTON  
Solvent DMSO

Temperature 25  
Spectrometer nmr400-mercury400

Laboratory MODCL  
NMR User sameeh\_Abdawy

DR\_AbeerElnagar-q13N

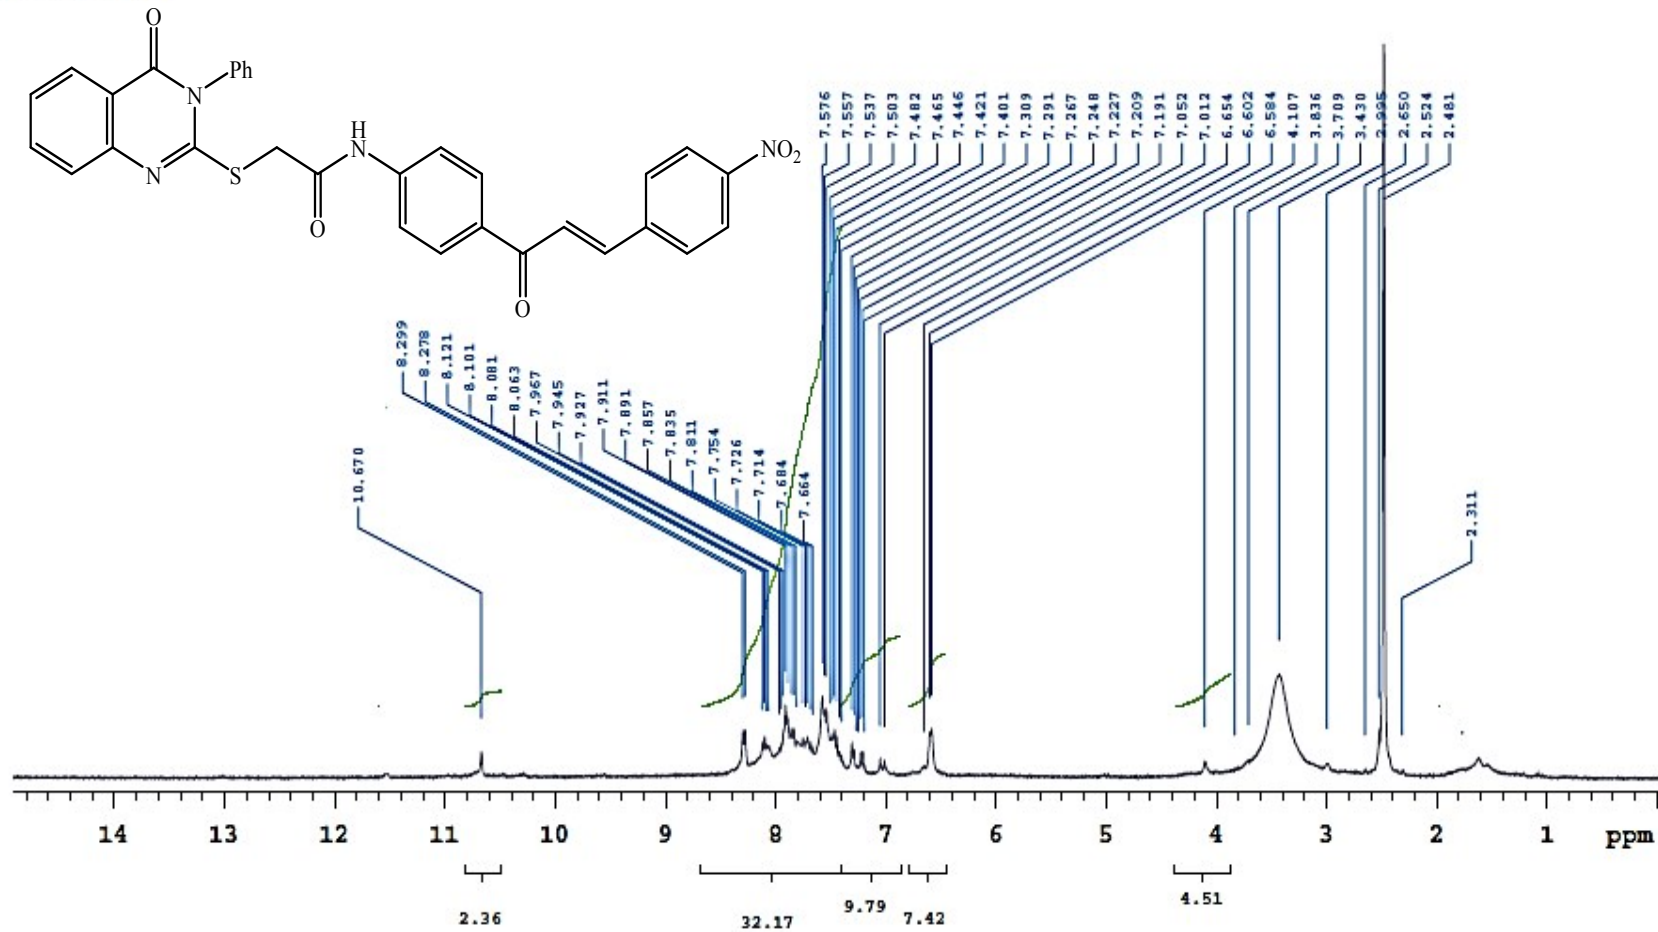



2-Hydrazinyl-3-phenylquinazolin-4(3H)-one (11).

IR

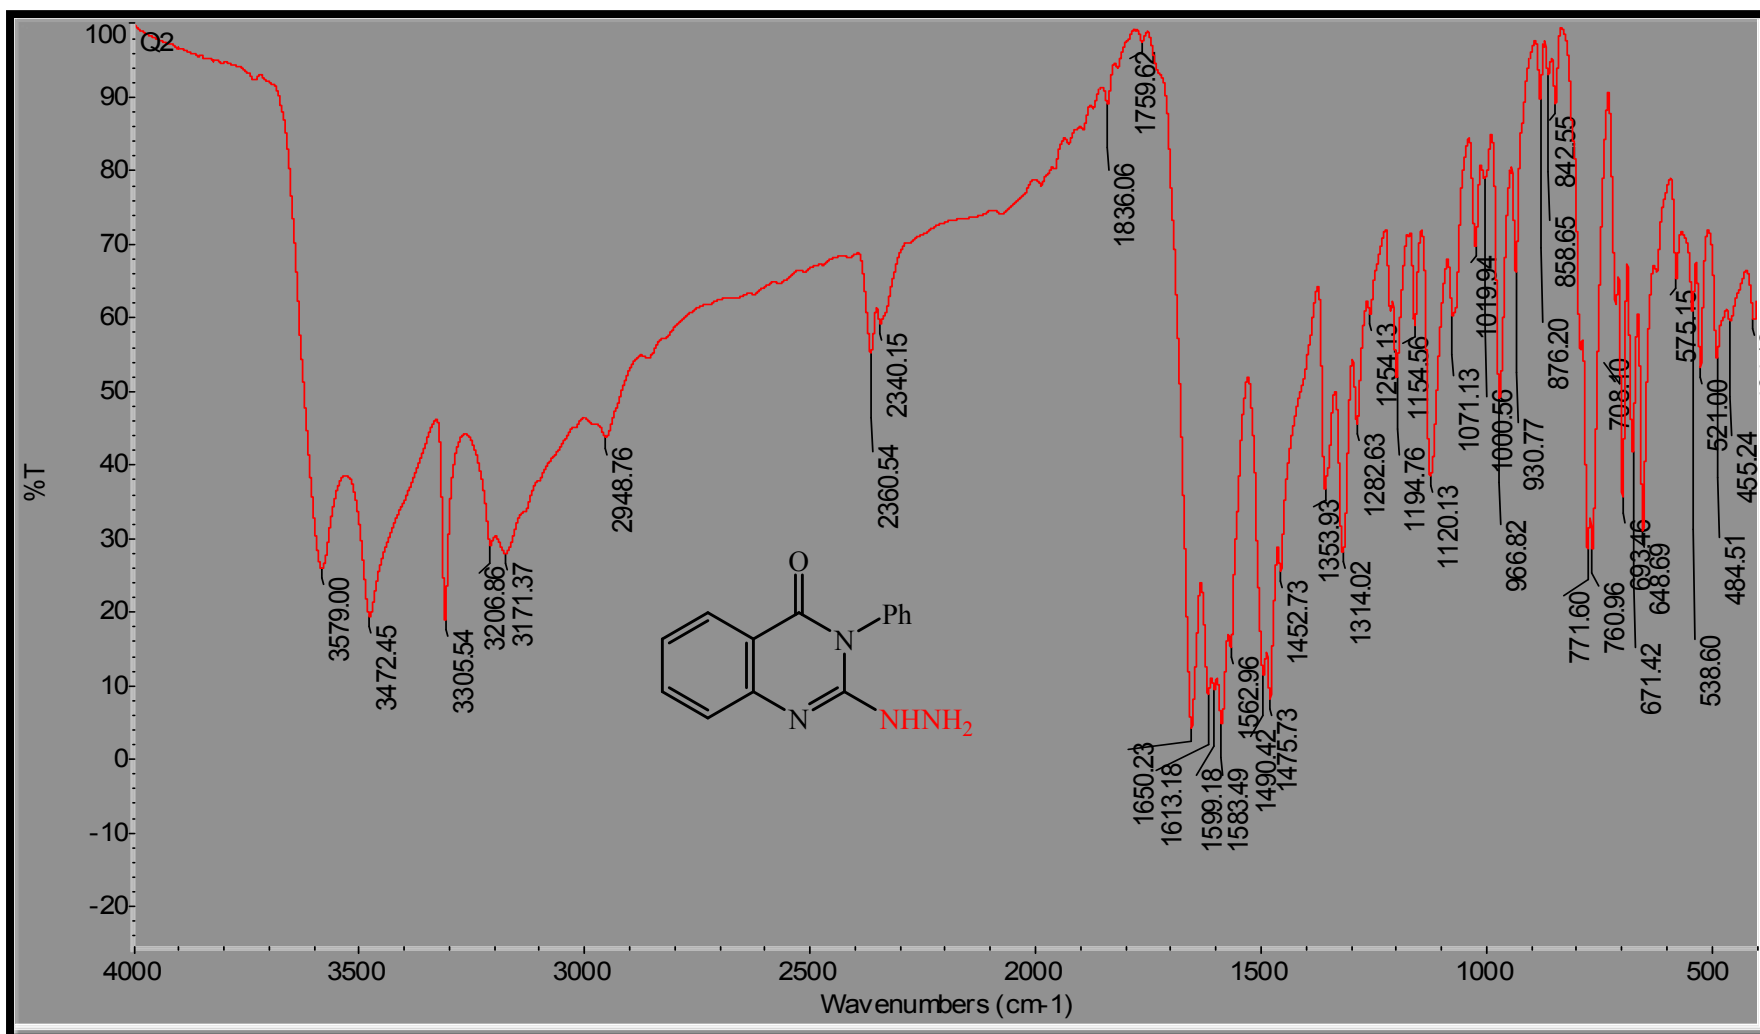

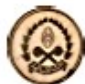

Dr\_AbeerElnagar-q2

Dr\_AbeerElnagar-q2

Sample Name Dr\_AbeerElnagar-q2  
Date collected 2018-02-26

Pulse sequence PROTON  
Solvent DMSO

Temperature 25  
Spectrometer nmr400-mercury400

Study owner vnmr1  
Operator vnmr1

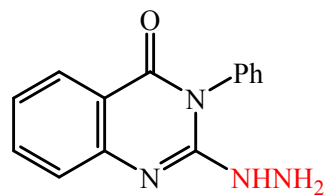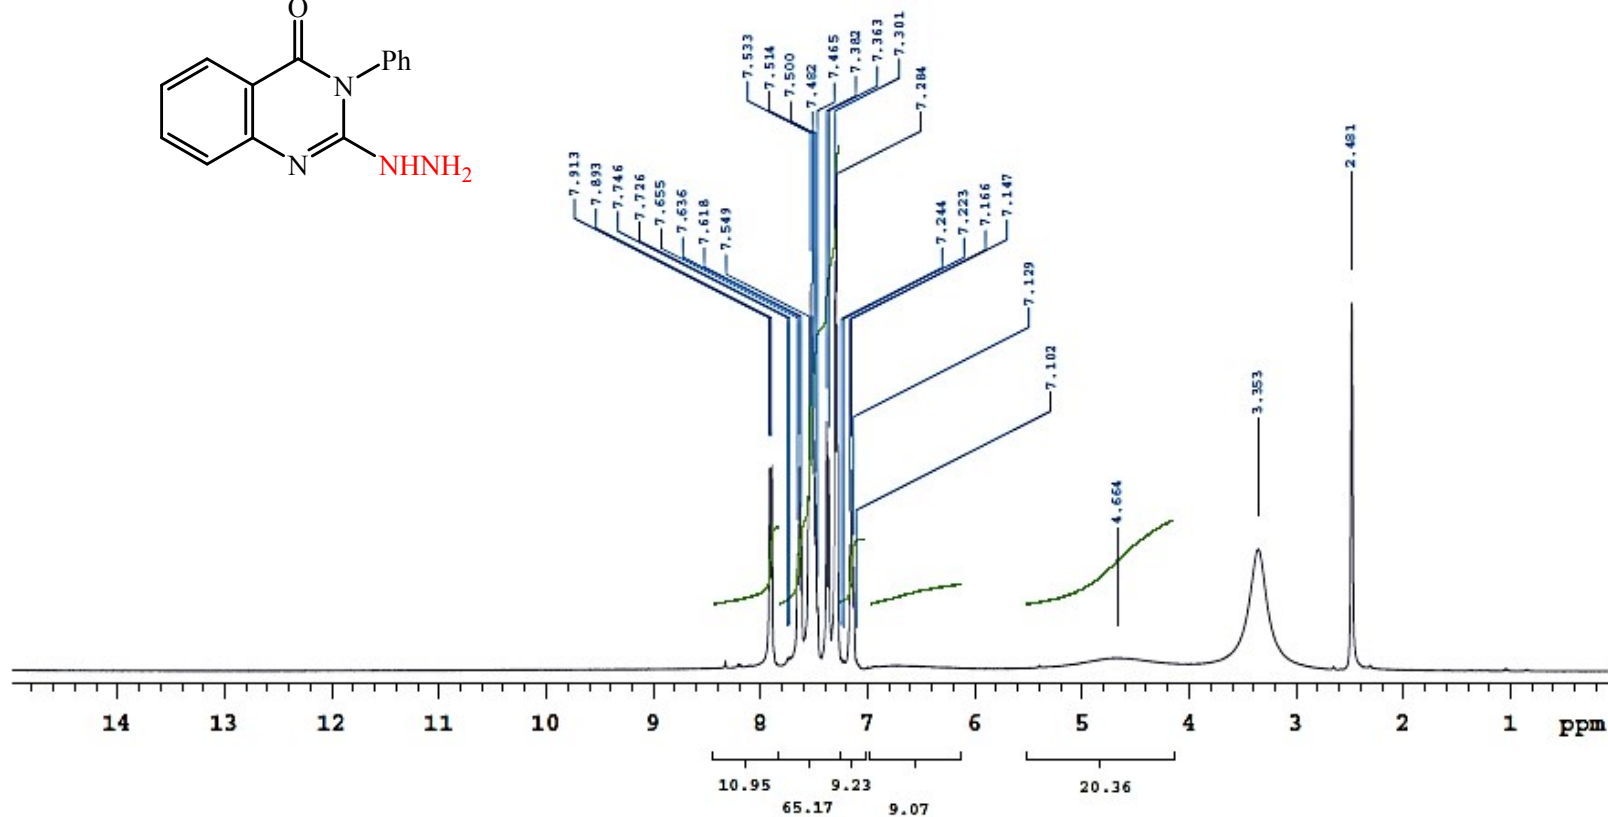

D20

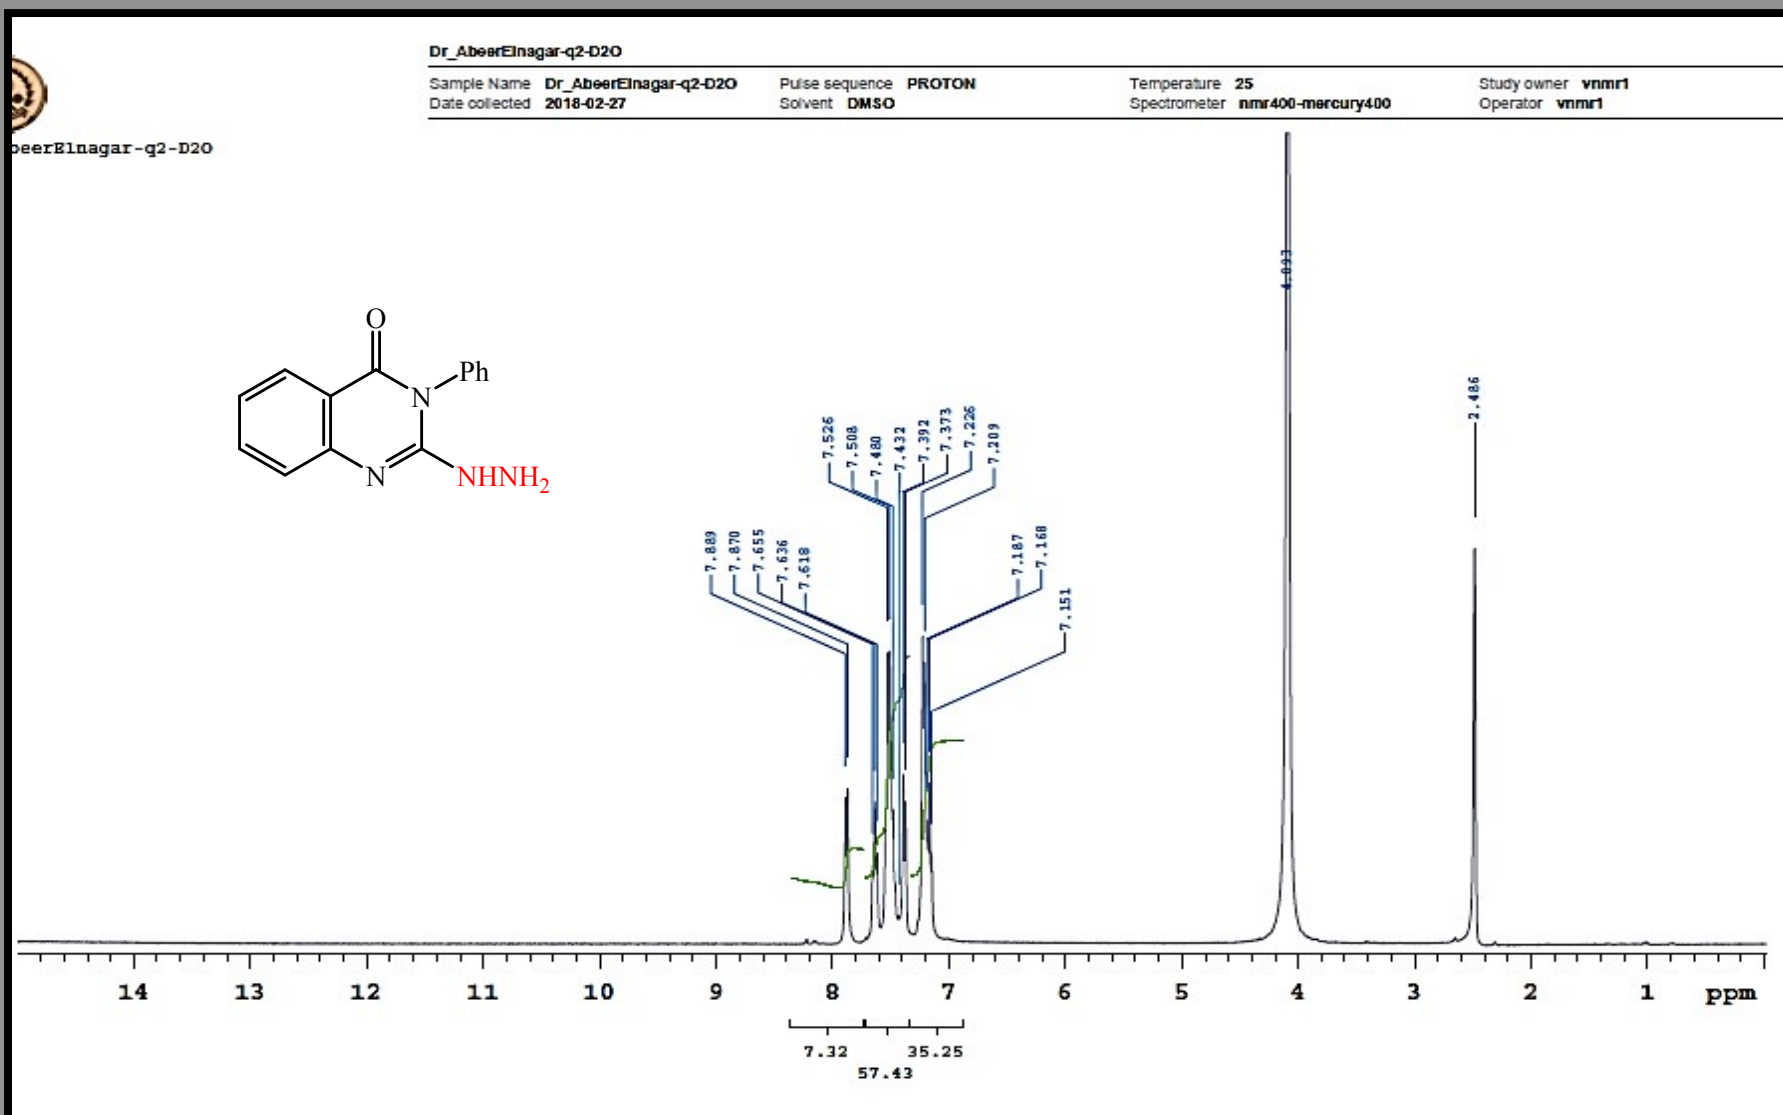

*Methyl 4-(2-(2-(4-oxo-3-phenyl-3,4-dihydroquinazolin-2-yl)hydrazinyl)acetamido)benzoate (12a).*

IR

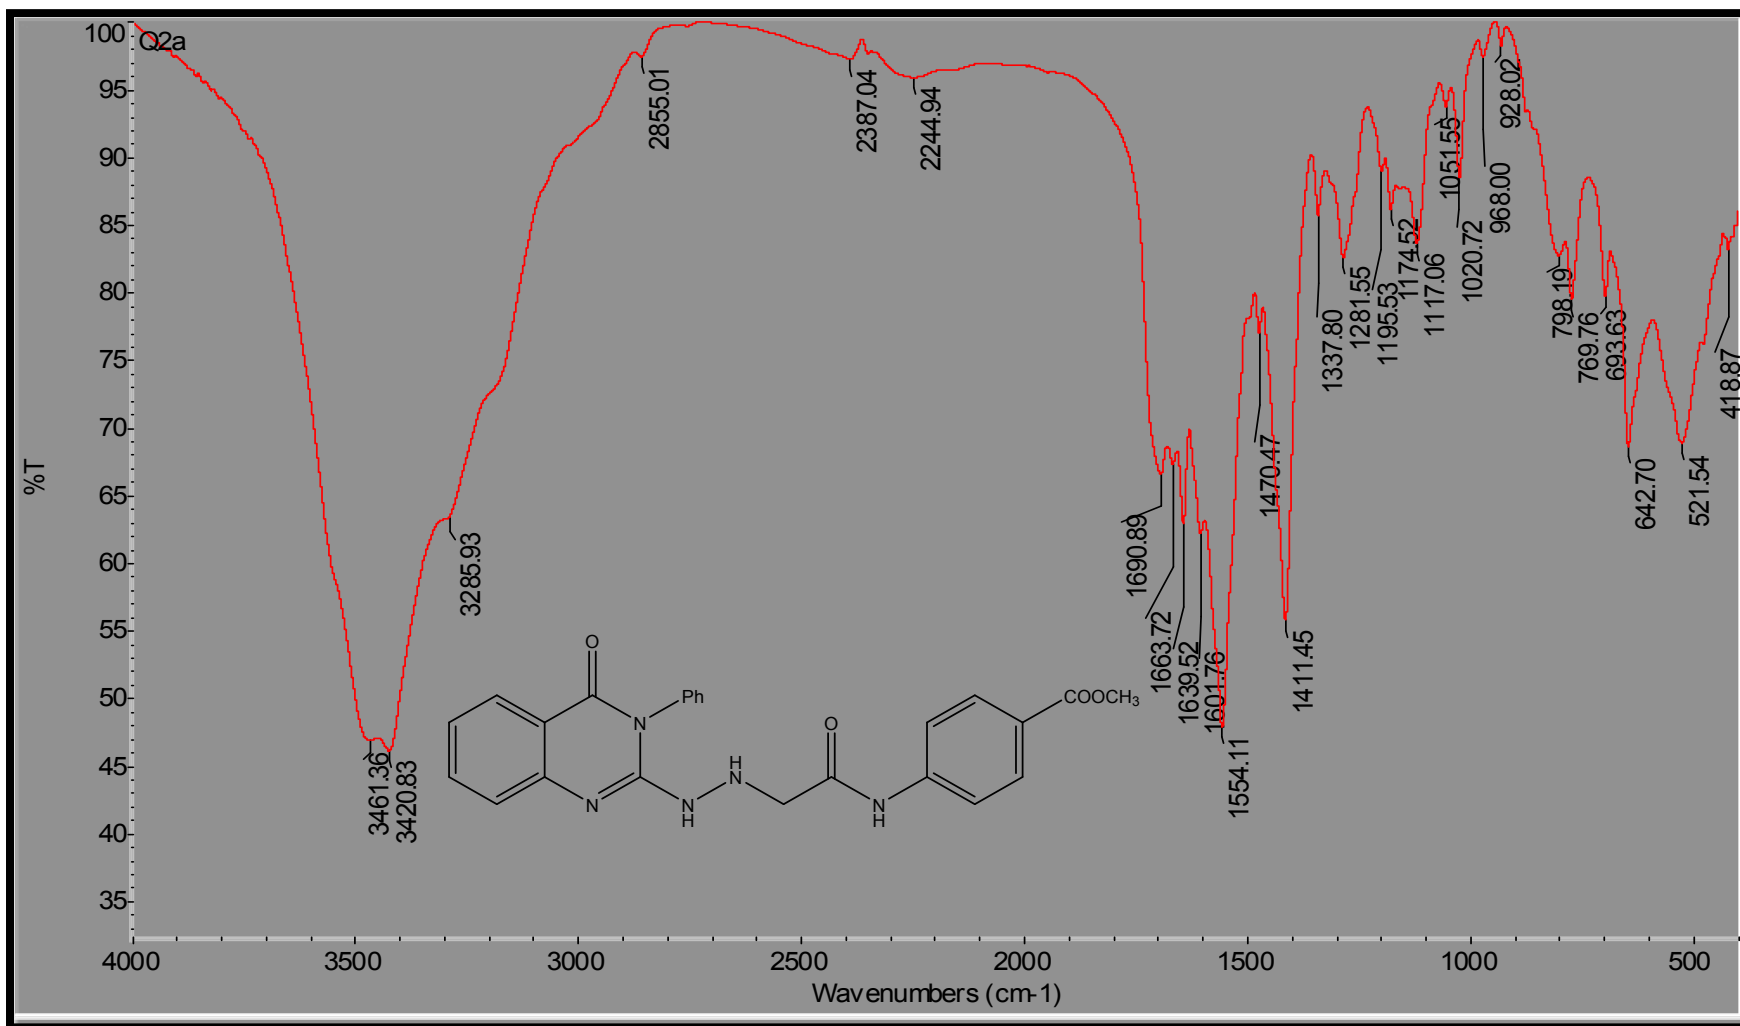

# HNMR

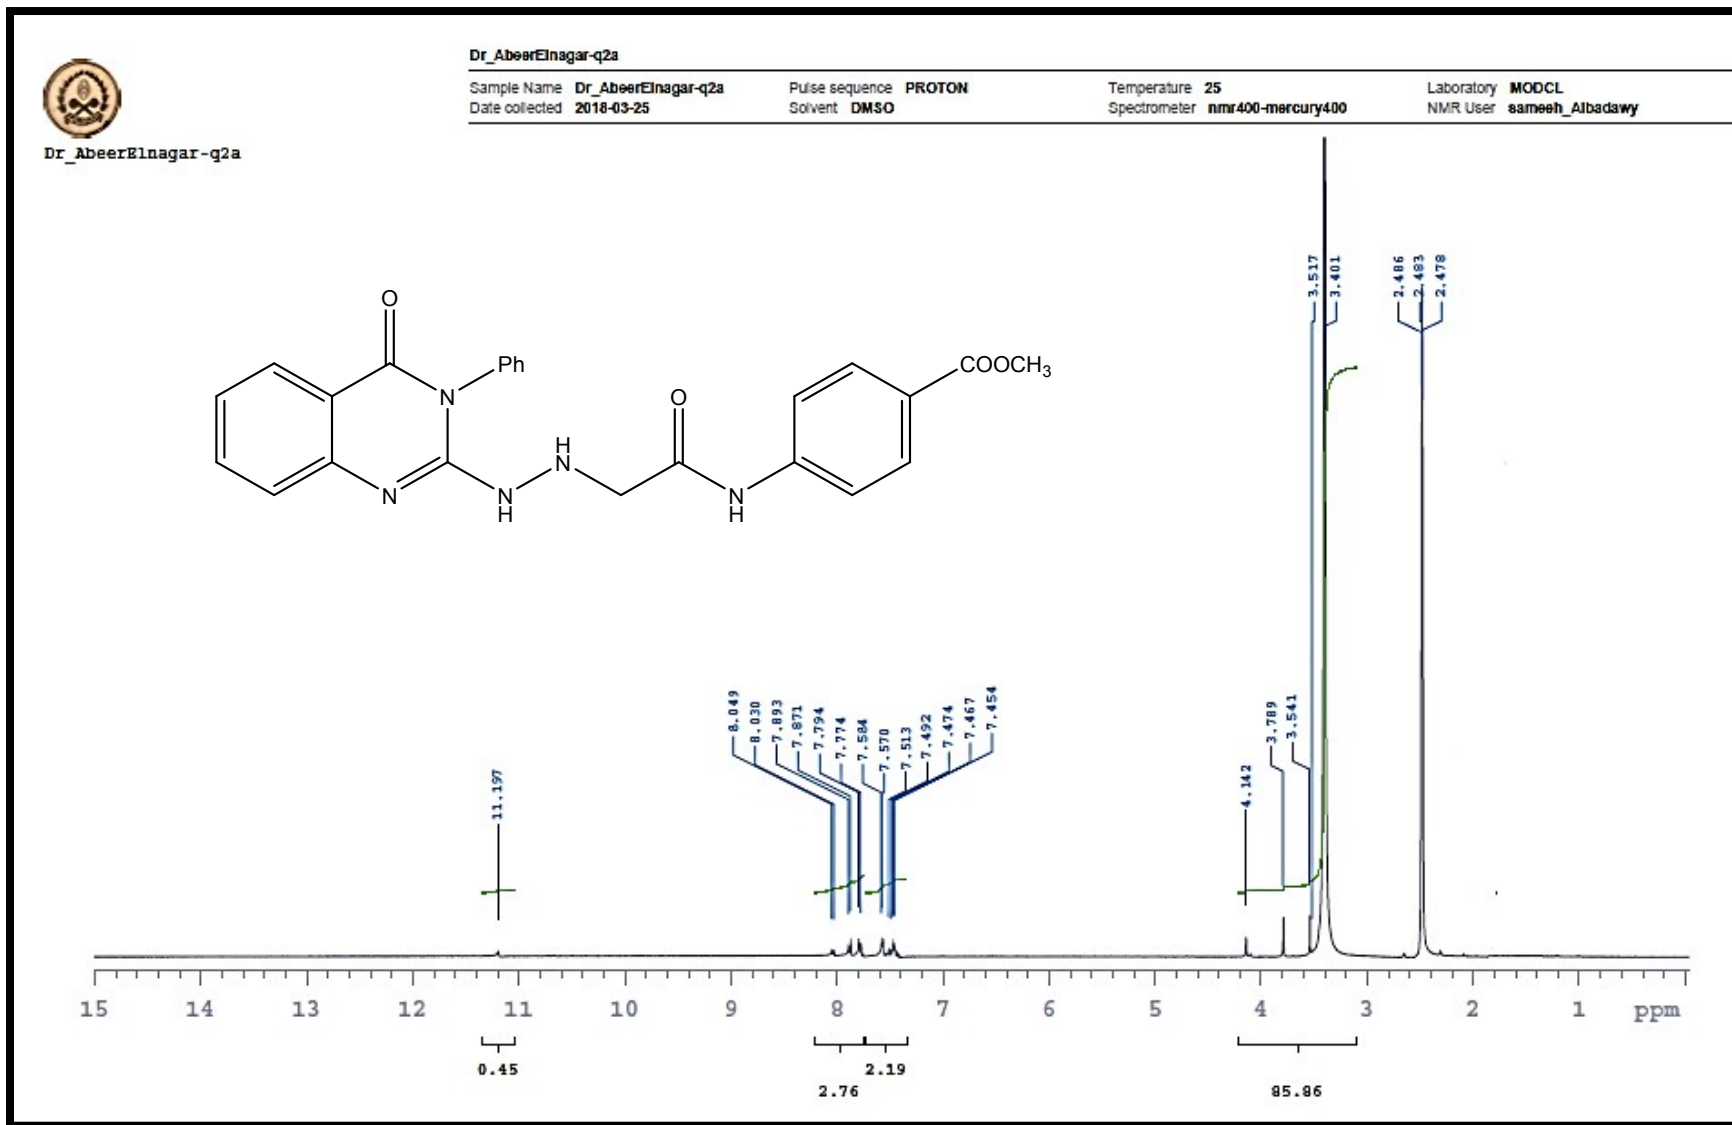

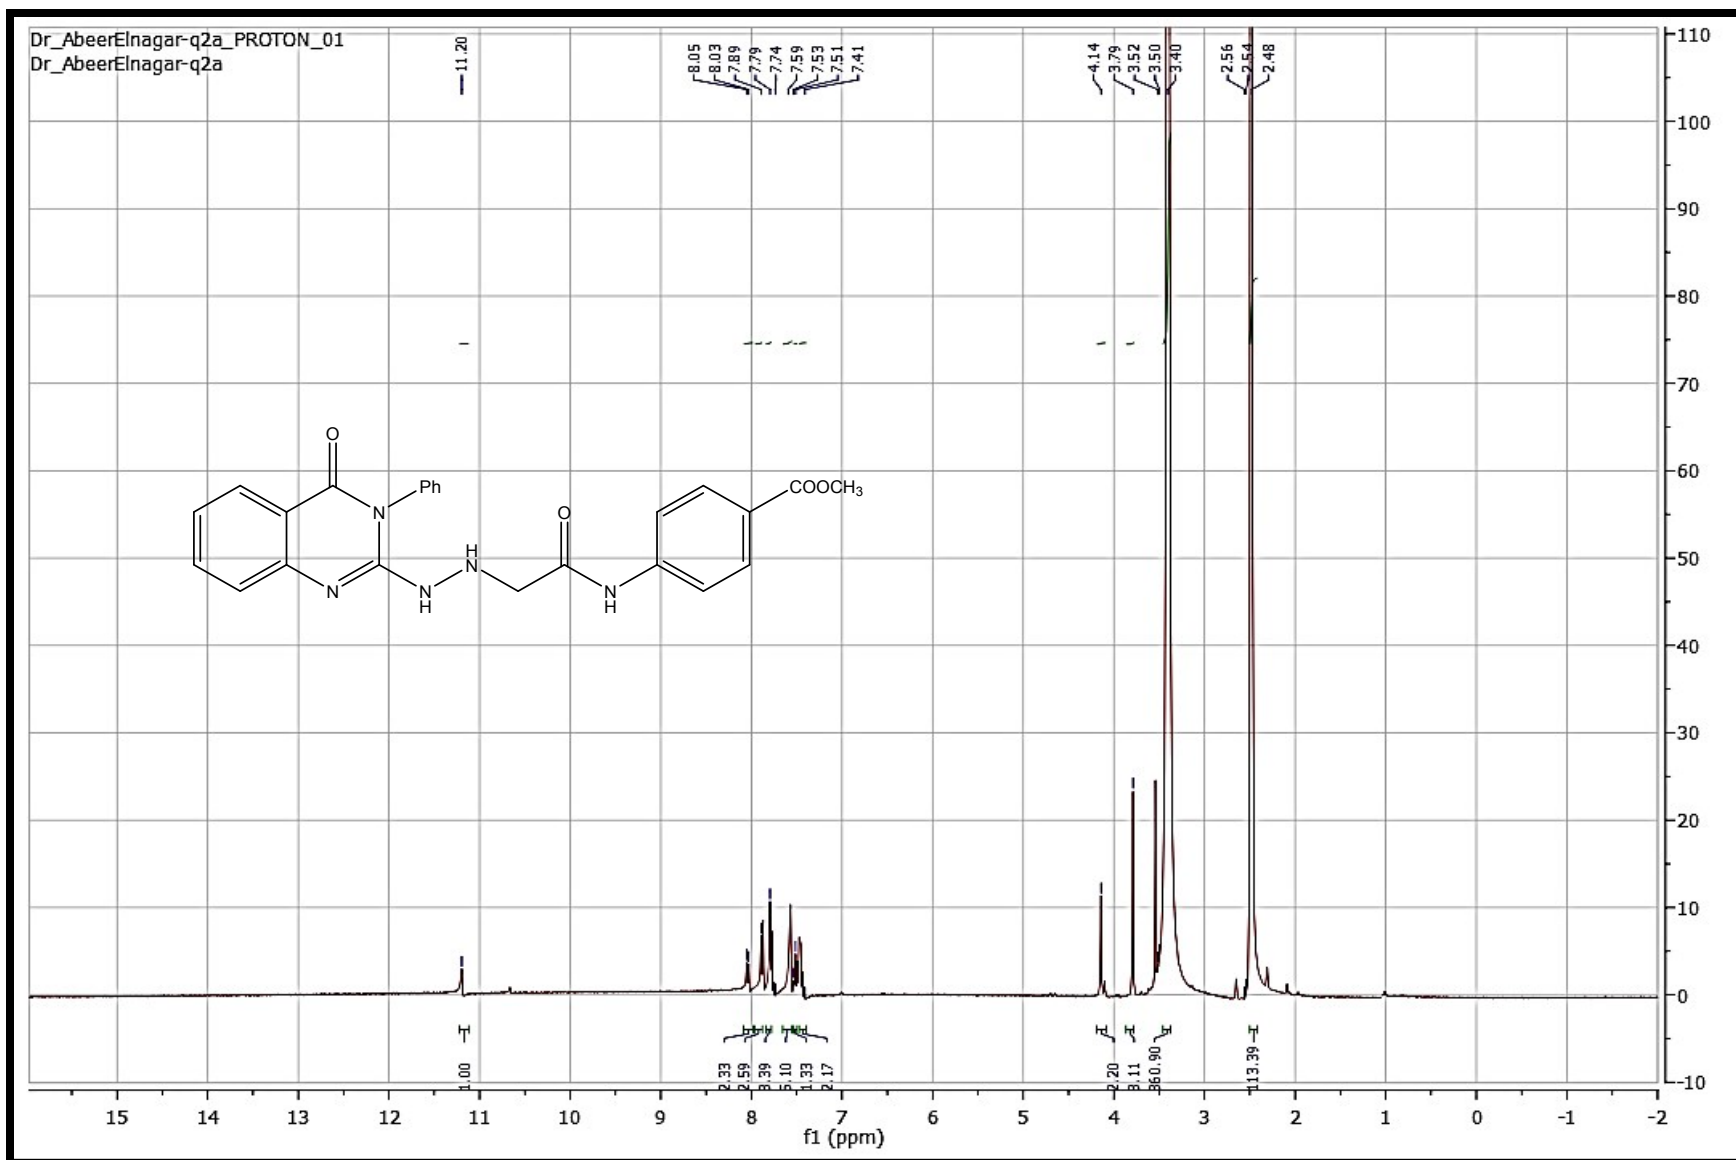

Dr\_AbeerElnagar-q2a\_PROTON\_01  
Dr\_AbeerElnagar-q2a

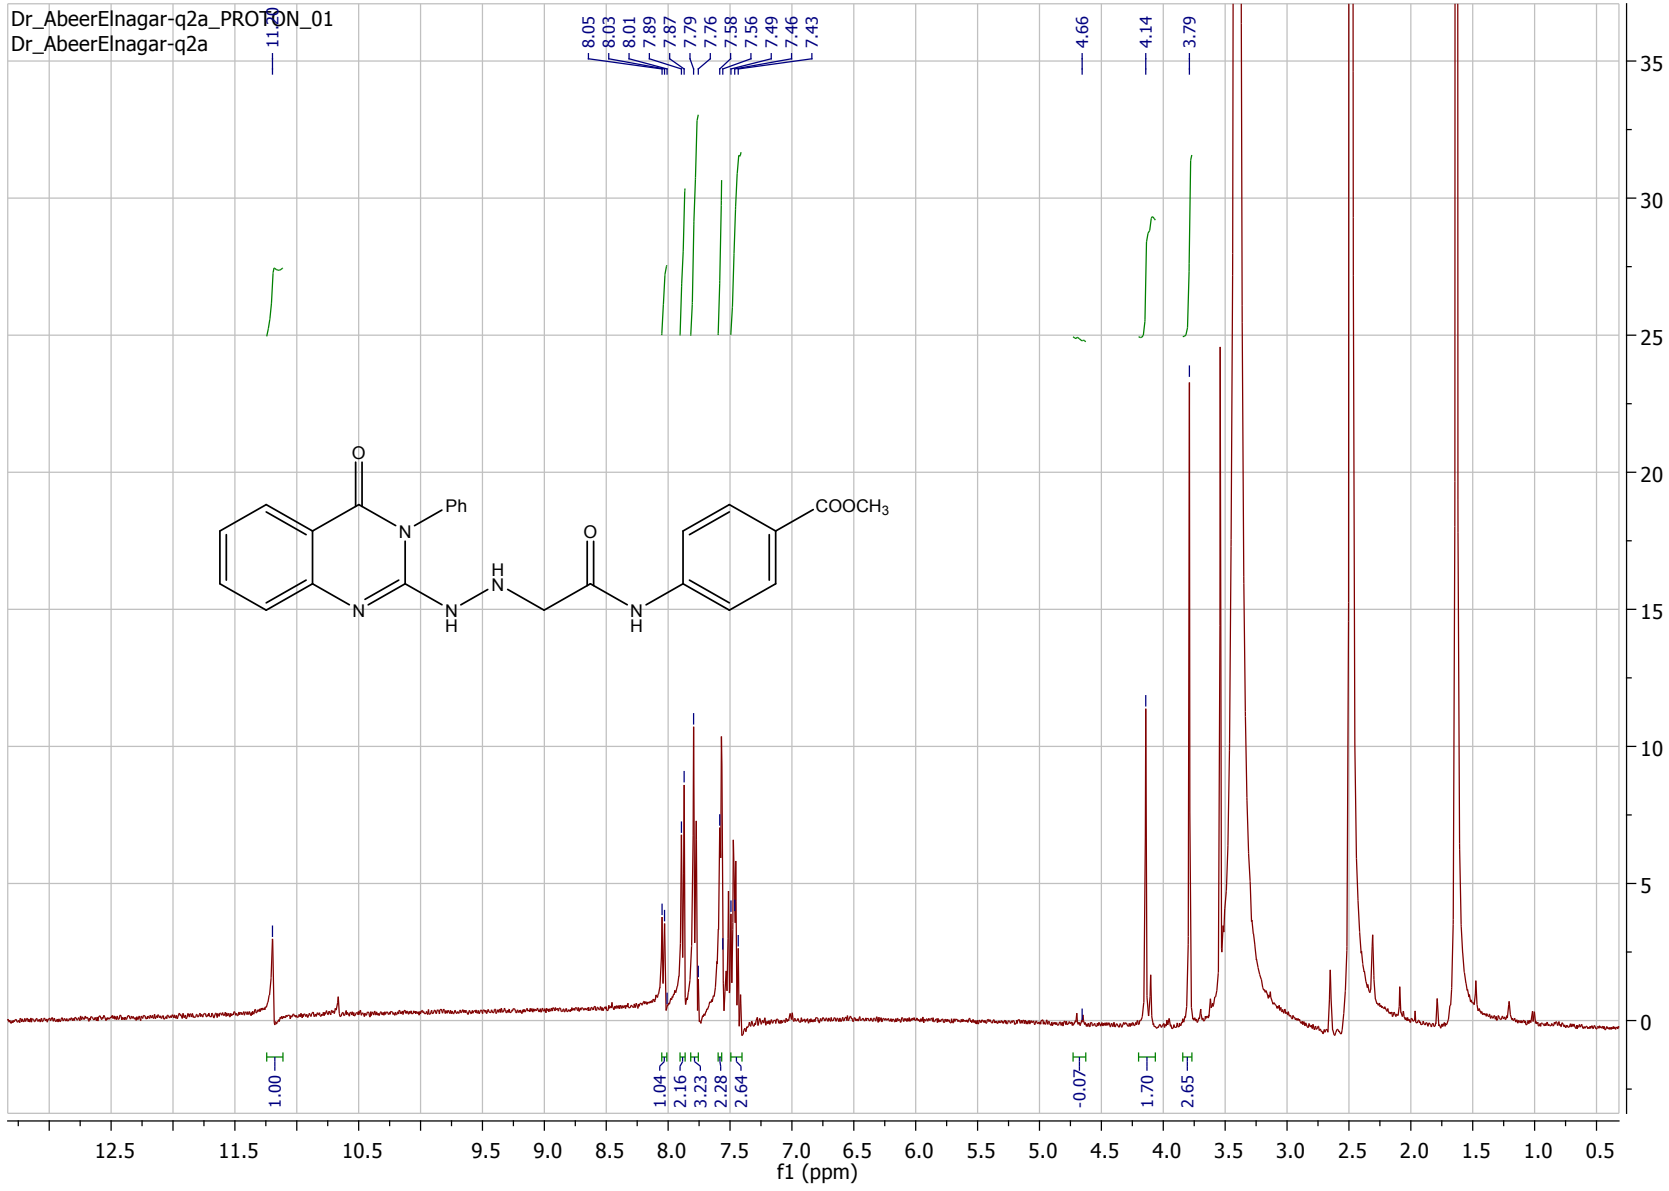

Dr\_AbeerElnagar-q2a\_PROTON\_01  
Dr\_AbeerElnagar-q2a

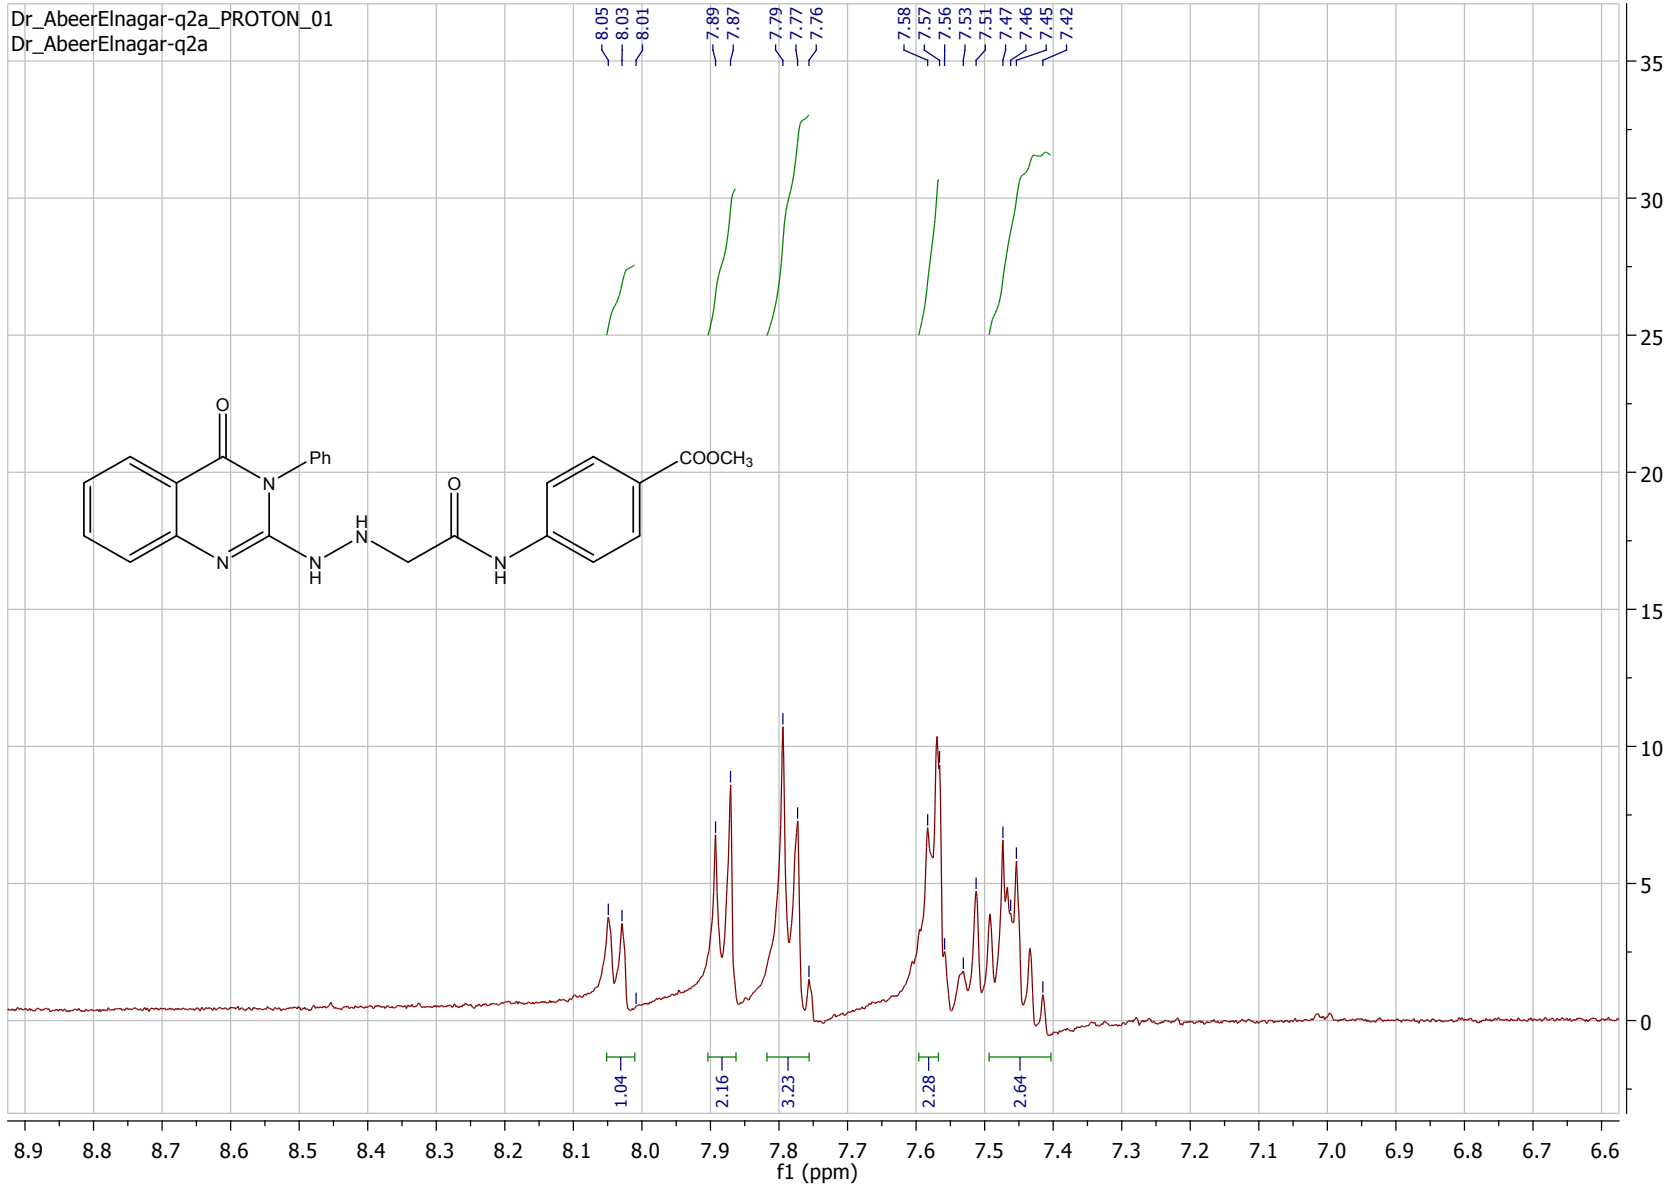



<sup>13</sup>C NMR

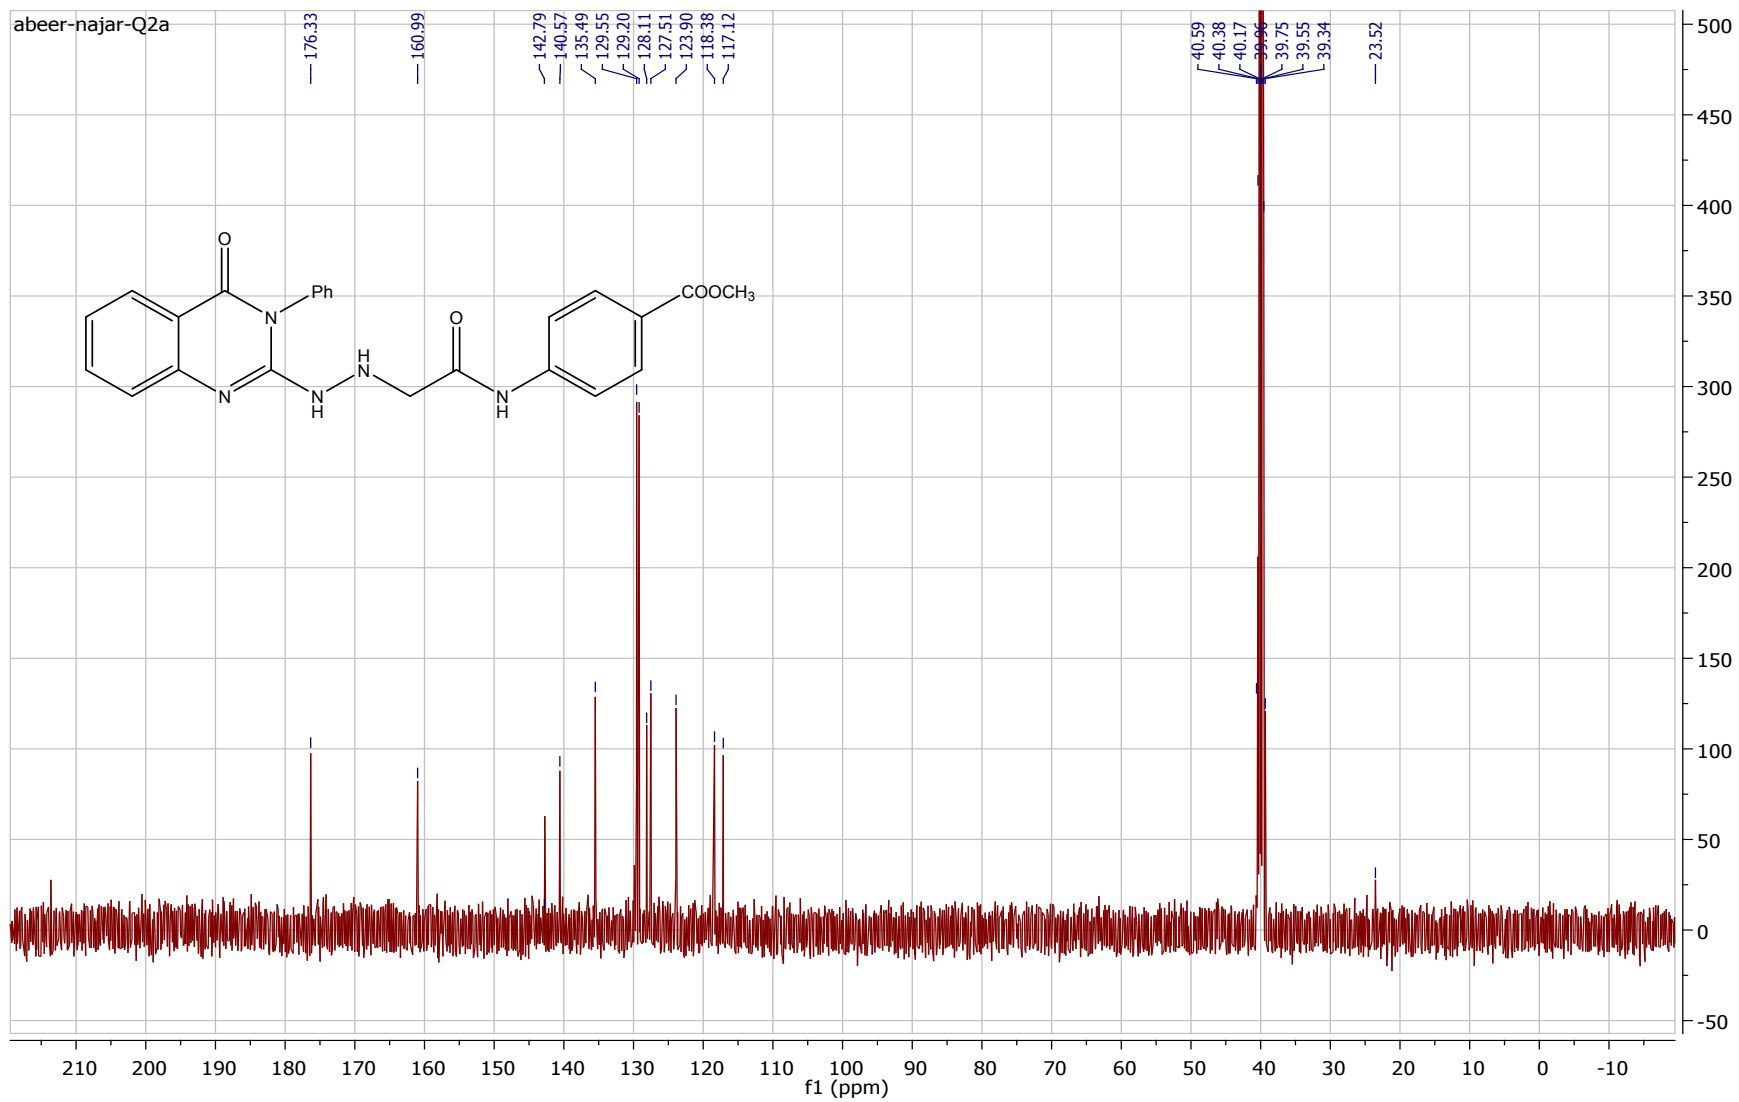

*N*-(4-Acetylphenyl)-2-(2-(4-oxo-3-phenyl-3,4-dihydroquinazolin-2-yl)hydrazinyl)acetamide (12b).

IR

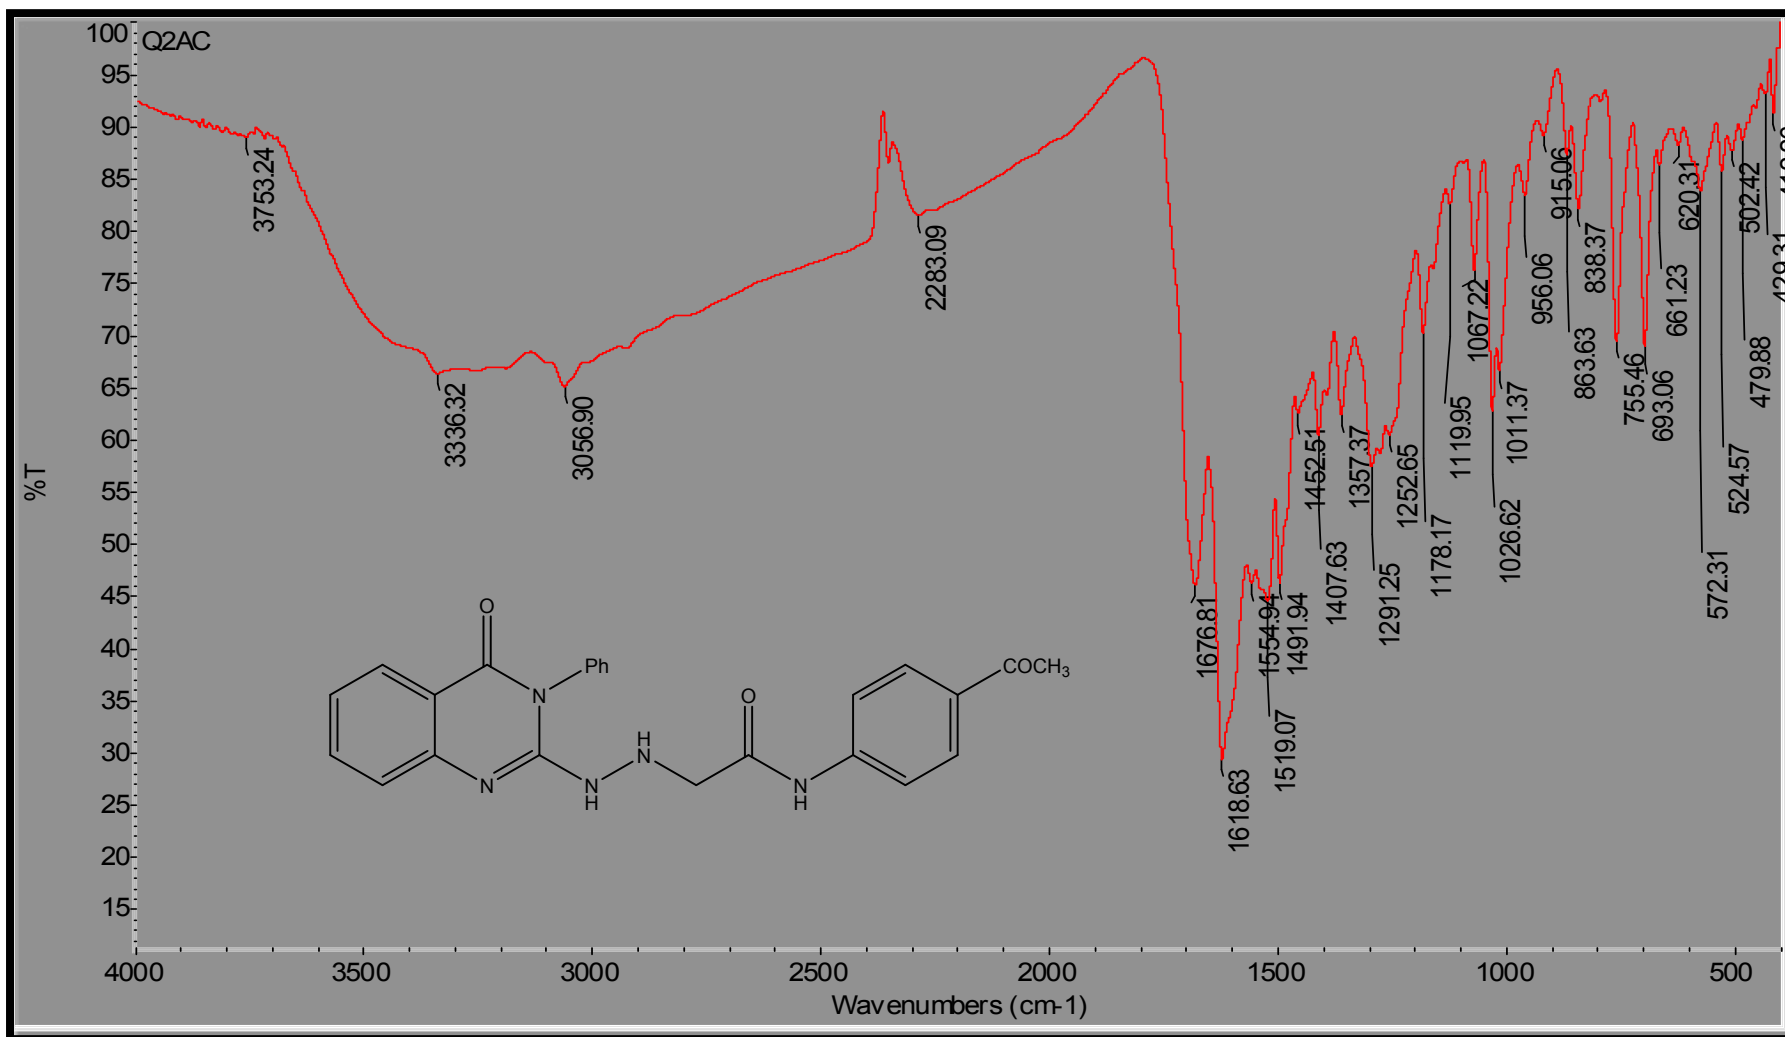



# HNMR

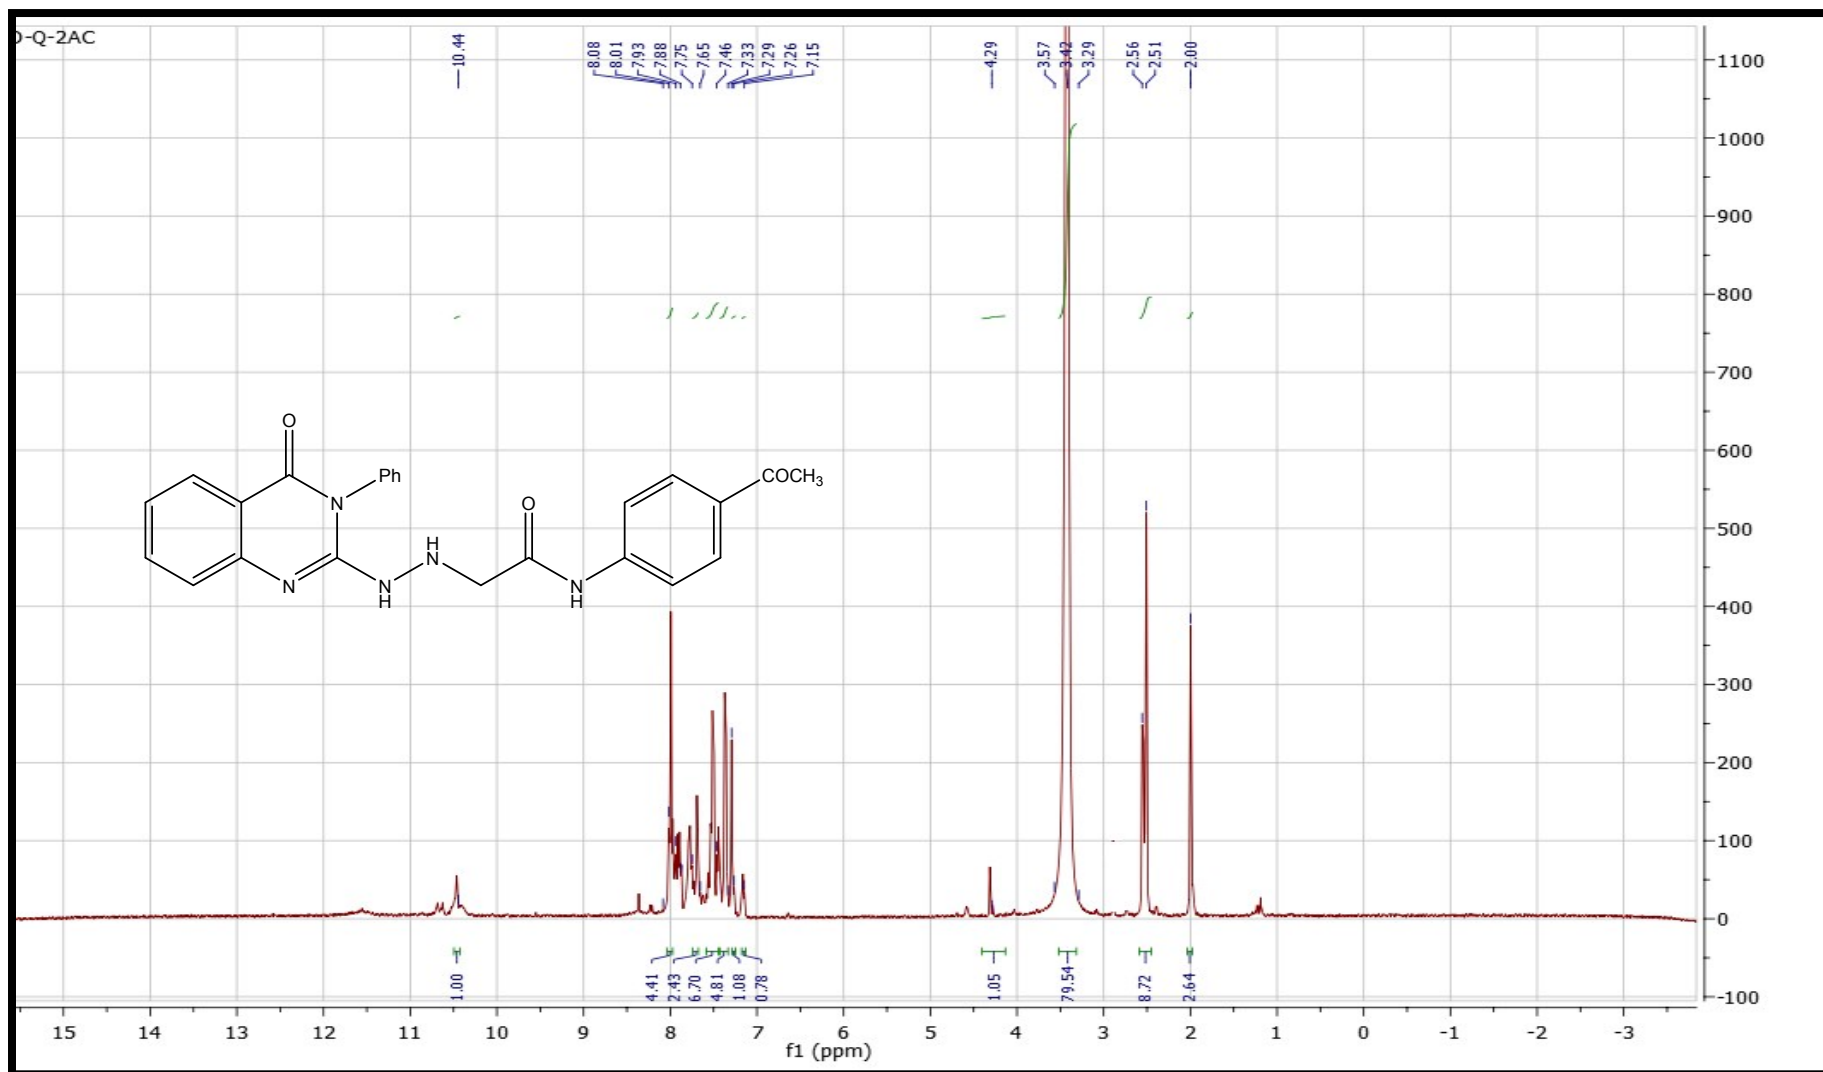

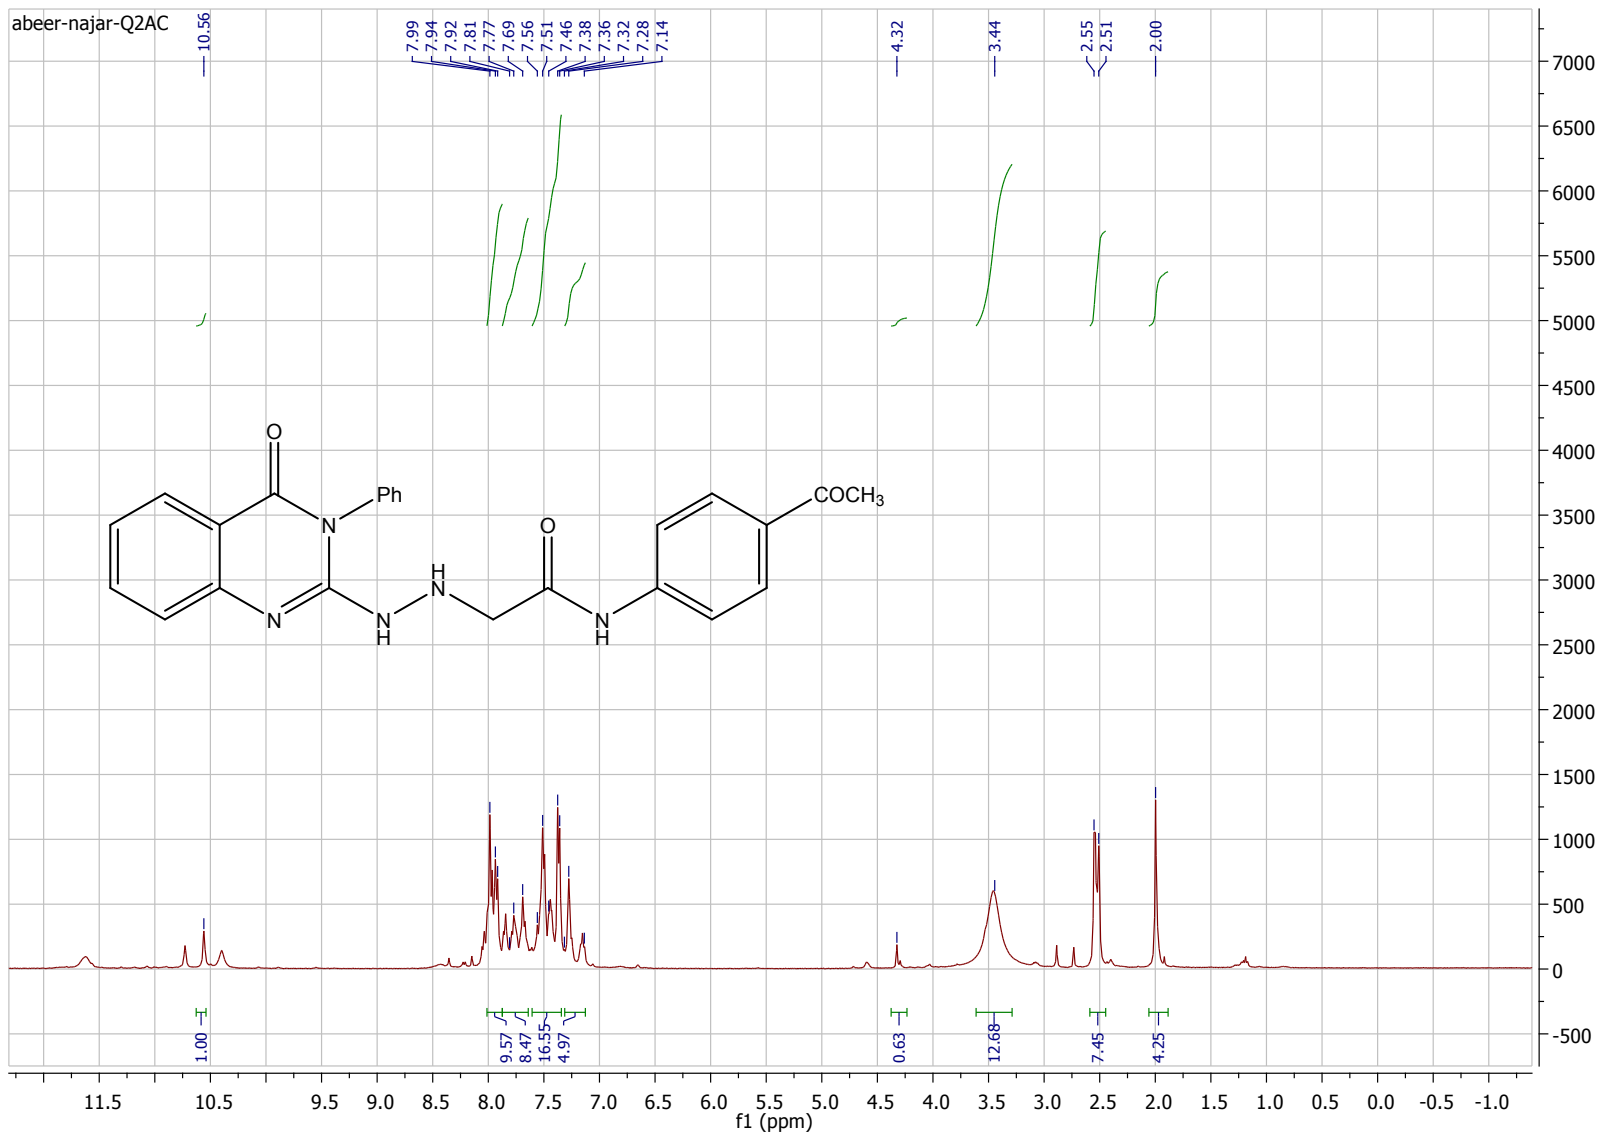

*2-(2-(4-oxo-3-phenyl-3,4-dihydroquinazolin-2-yl)hydrazinyl)-N-(4-sulfamoylphenyl)acetamide (12c).*

IR

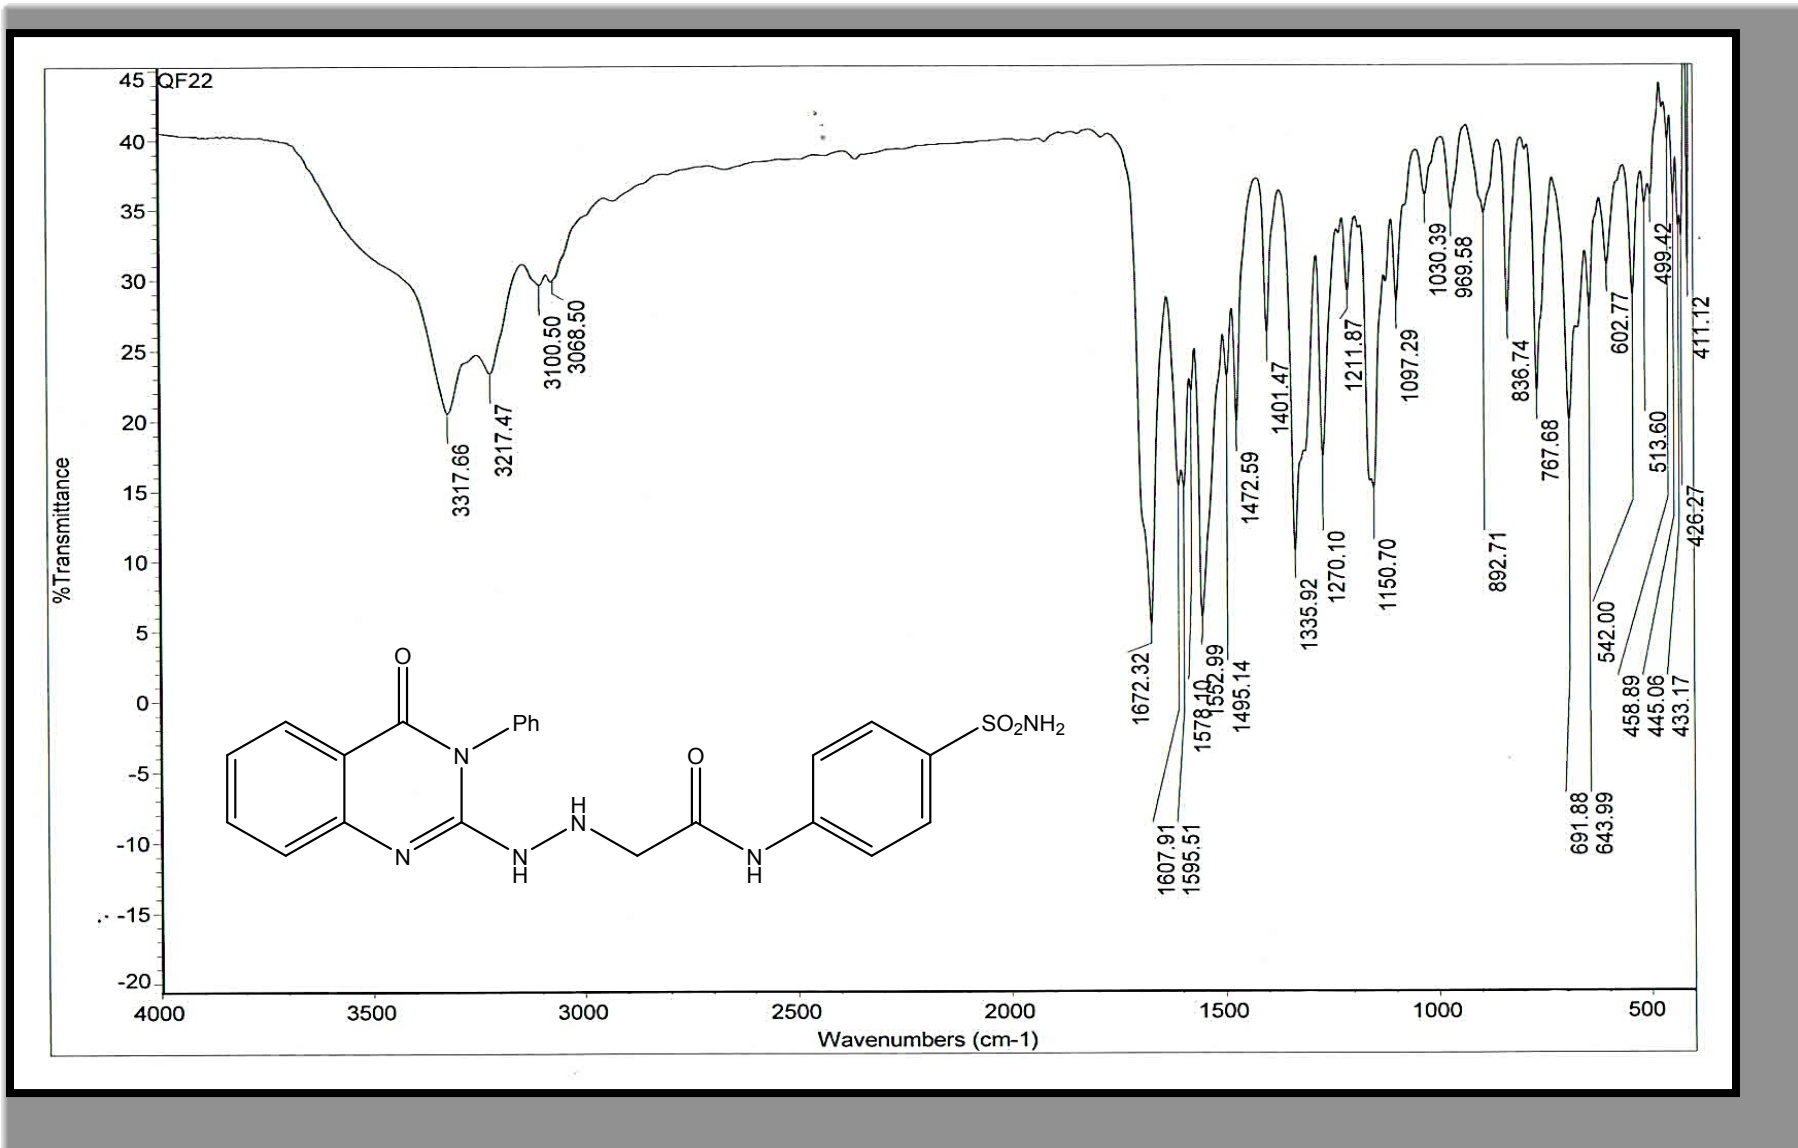

**HNMR**

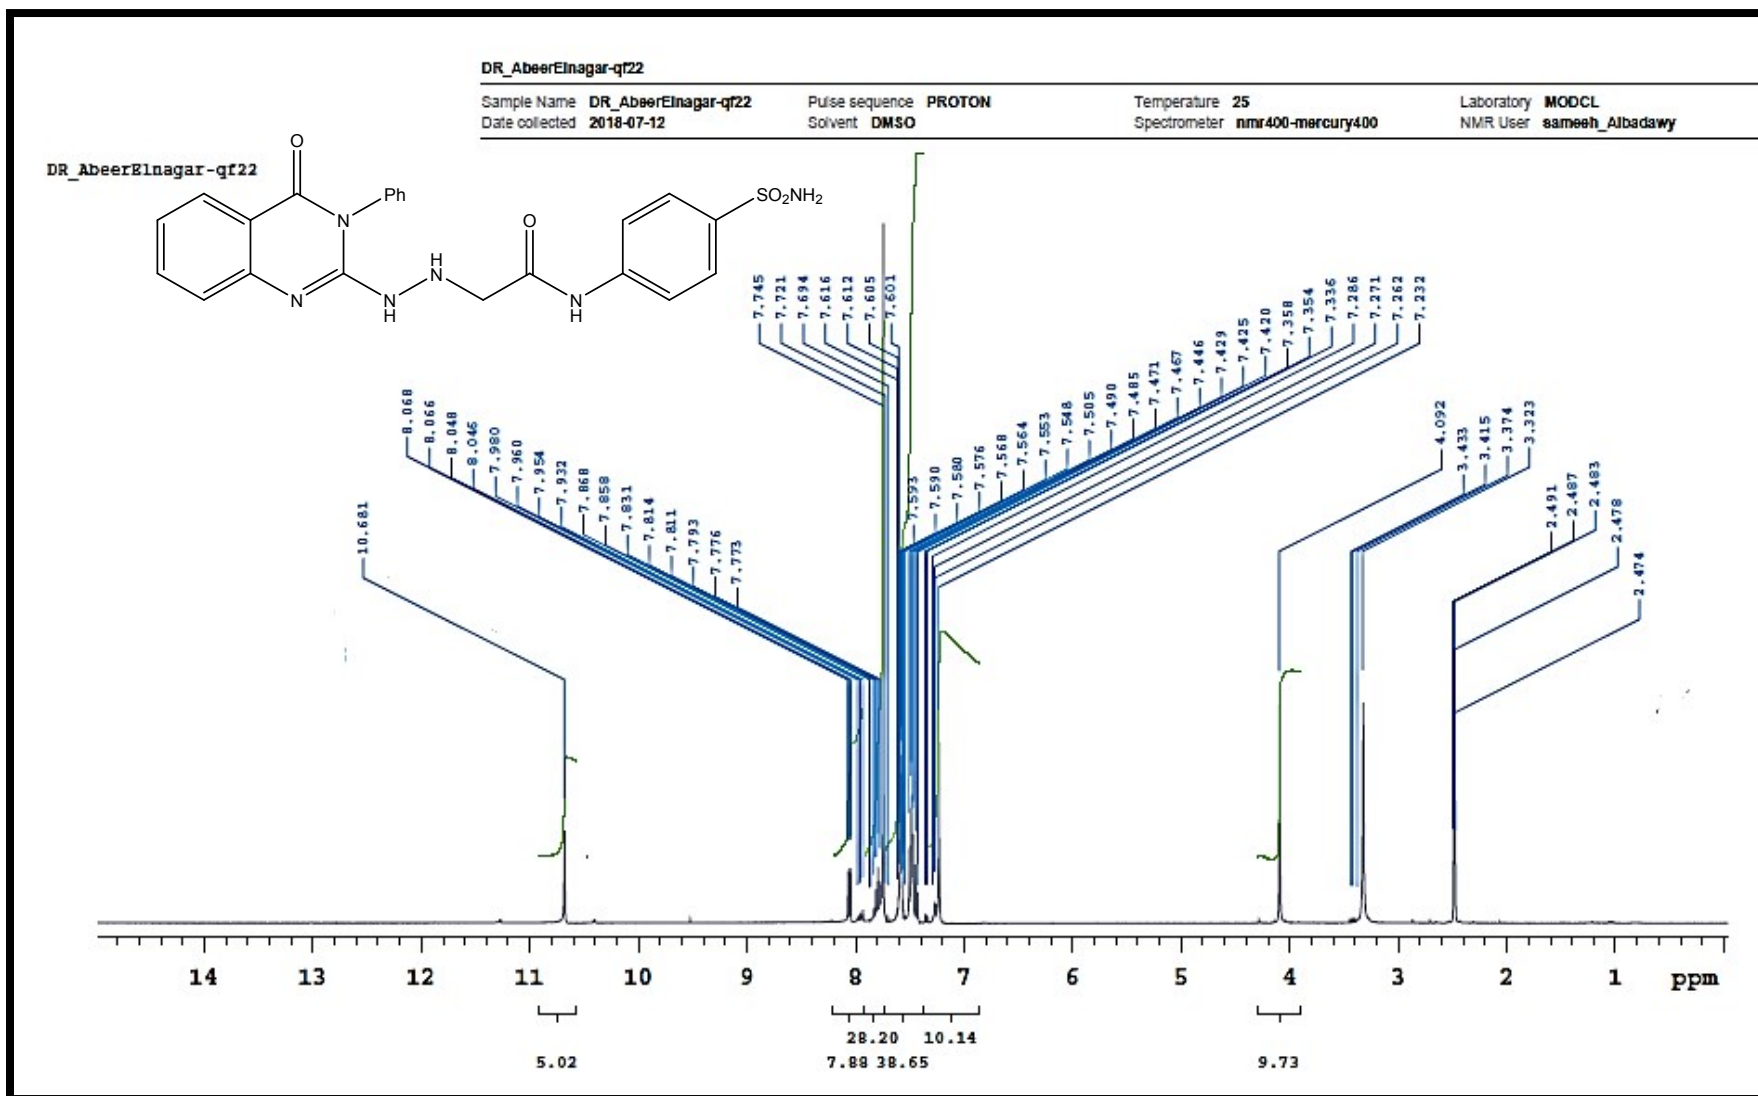

DR\_AbeerElmagar-qf22

Sample Name DR\_AbeerElmagar-qf22  
Date collected 2018-07-12

Pulse sequence PROTON  
Solvent DMSO

Temperature 25  
Spectrometer nmr400-mercury400

Laboratory MODCL  
NMR User sameeh

r-qf22

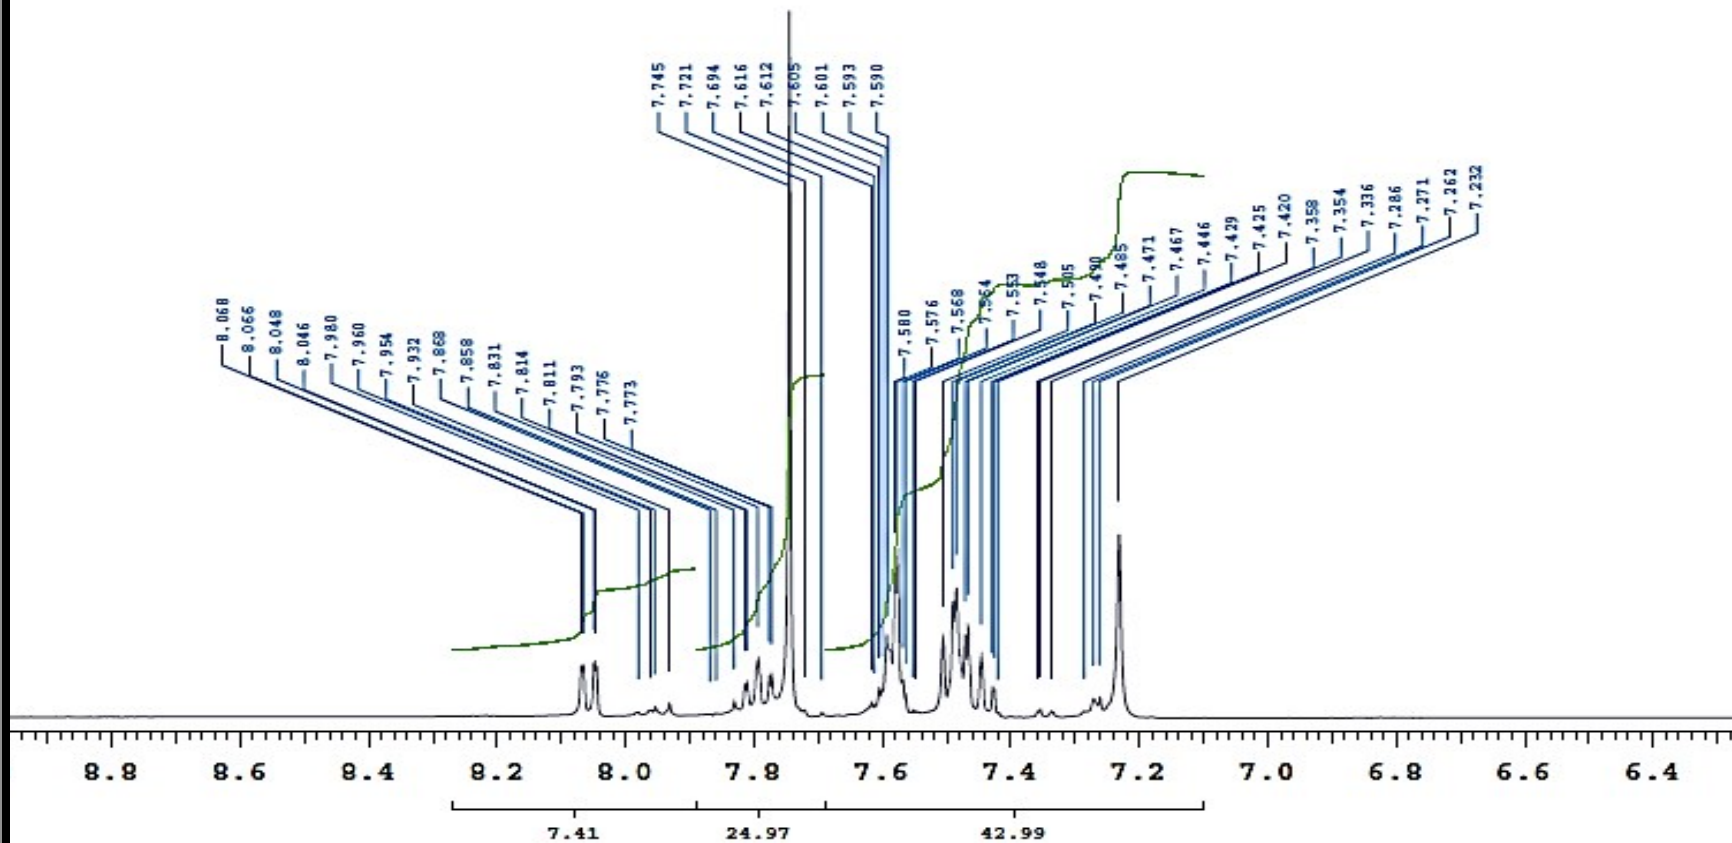



D2O

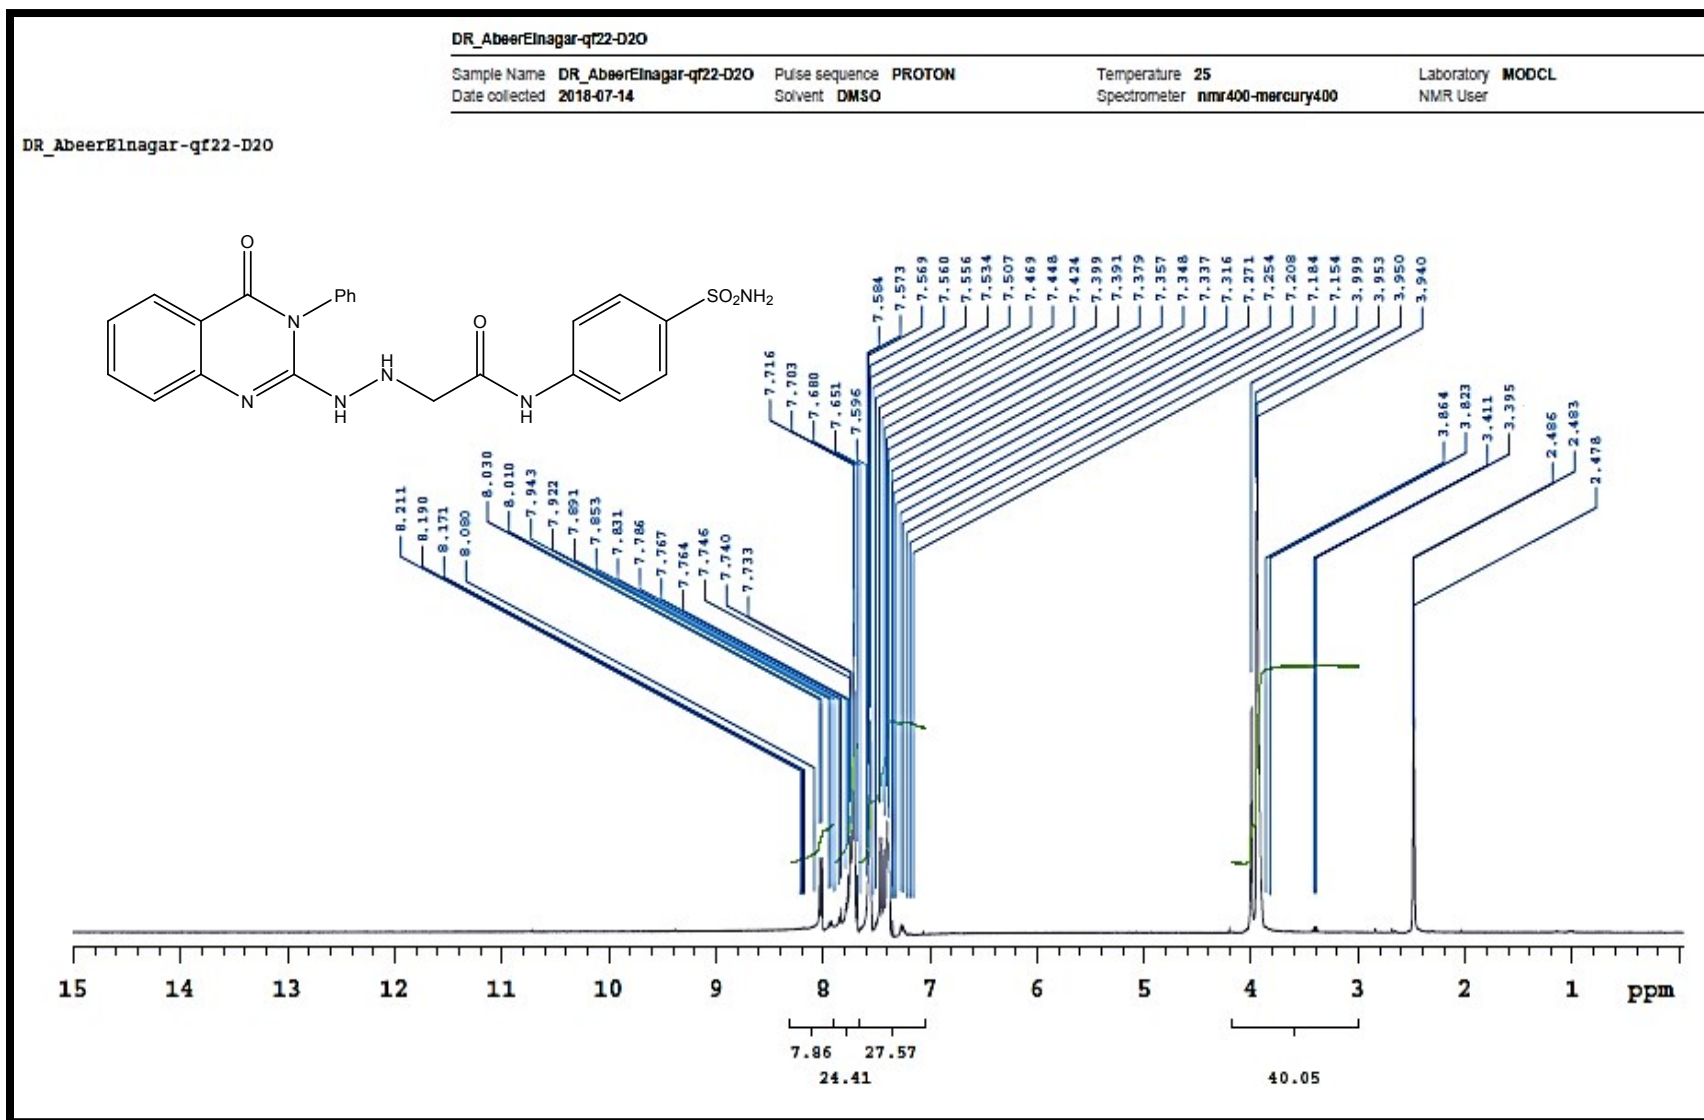

DR\_AbeerElnagar-qt22-D2O

|                |                          |                |        |              |                   |            |       |
|----------------|--------------------------|----------------|--------|--------------|-------------------|------------|-------|
| Sample Name    | DR_AbeerElnagar-qt22-D2O | Pulse sequence | PROTON | Temperature  | 25                | Laboratory | MODCL |
| Date collected | 2018-07-14               | Solvent        | DMSO   | Spectrometer | nmr400-mercury400 | NMR User   |       |

DR\_AbeerElnagar-qt22-D2O

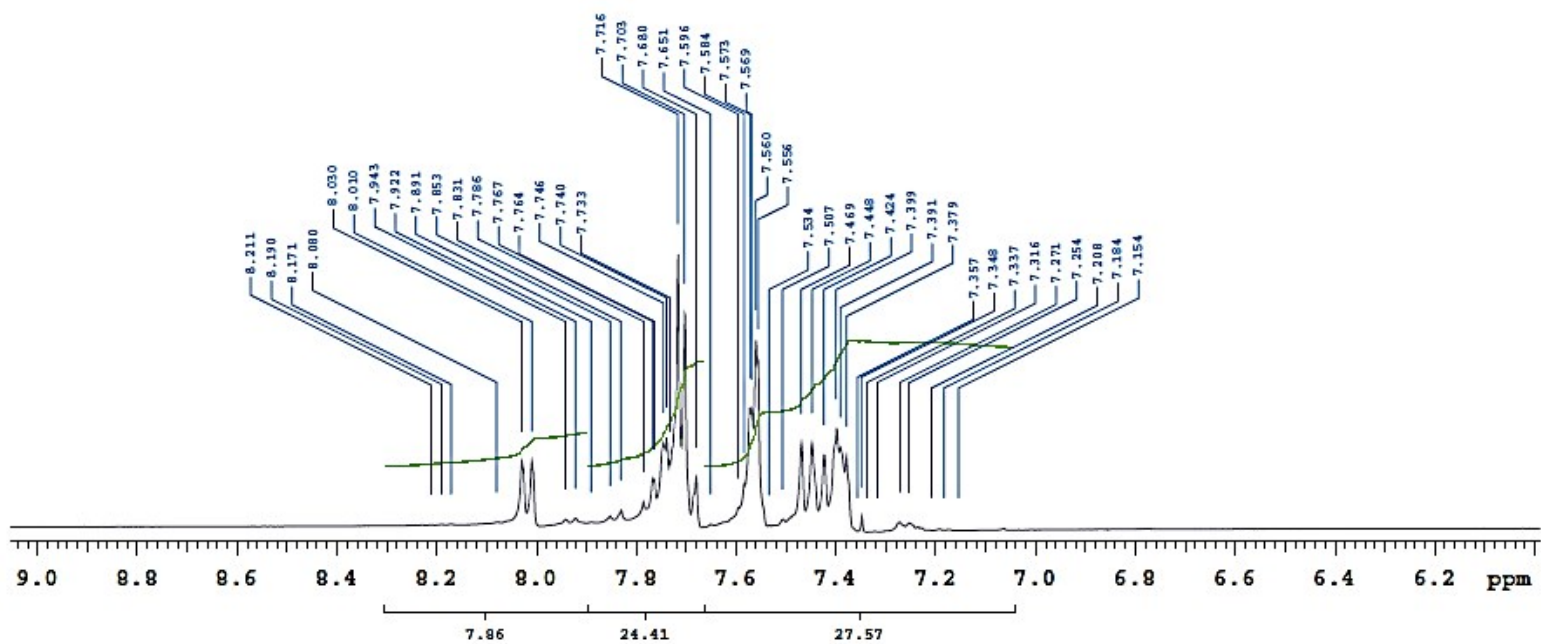

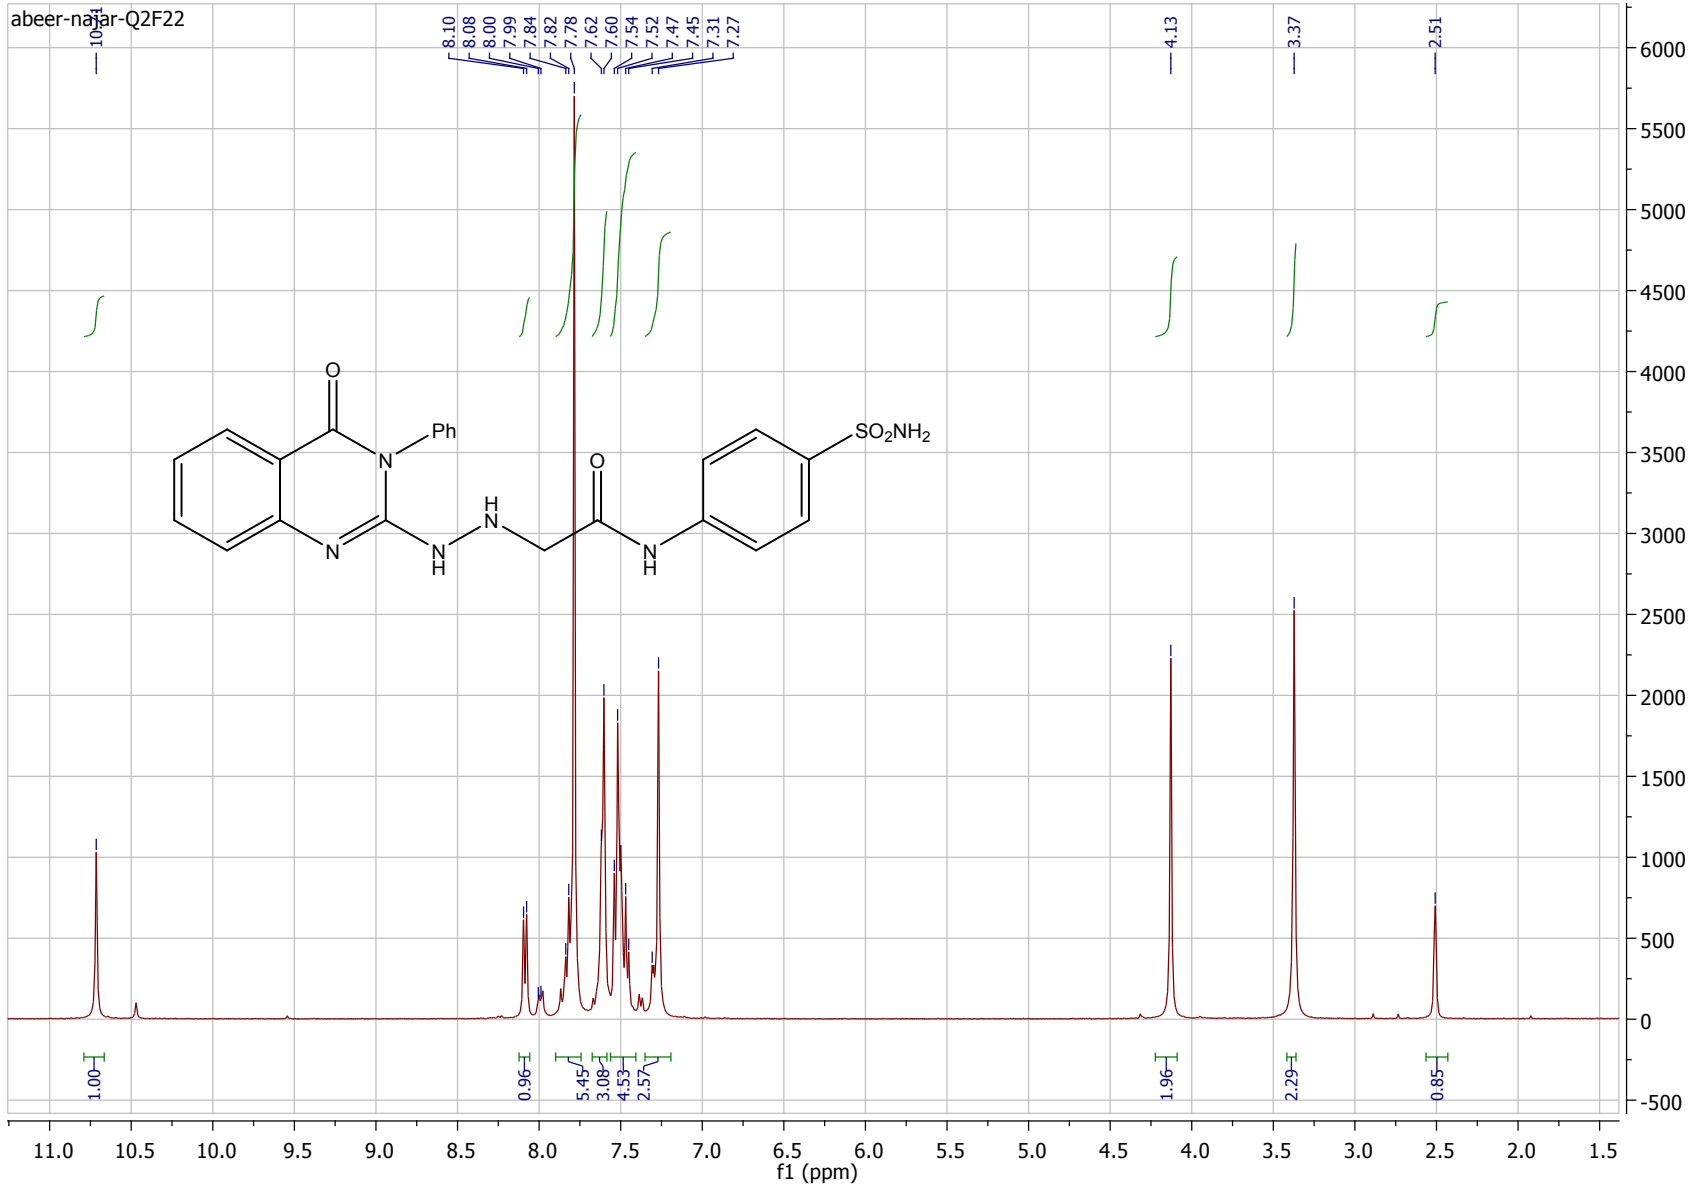

<sup>13</sup>C NMR

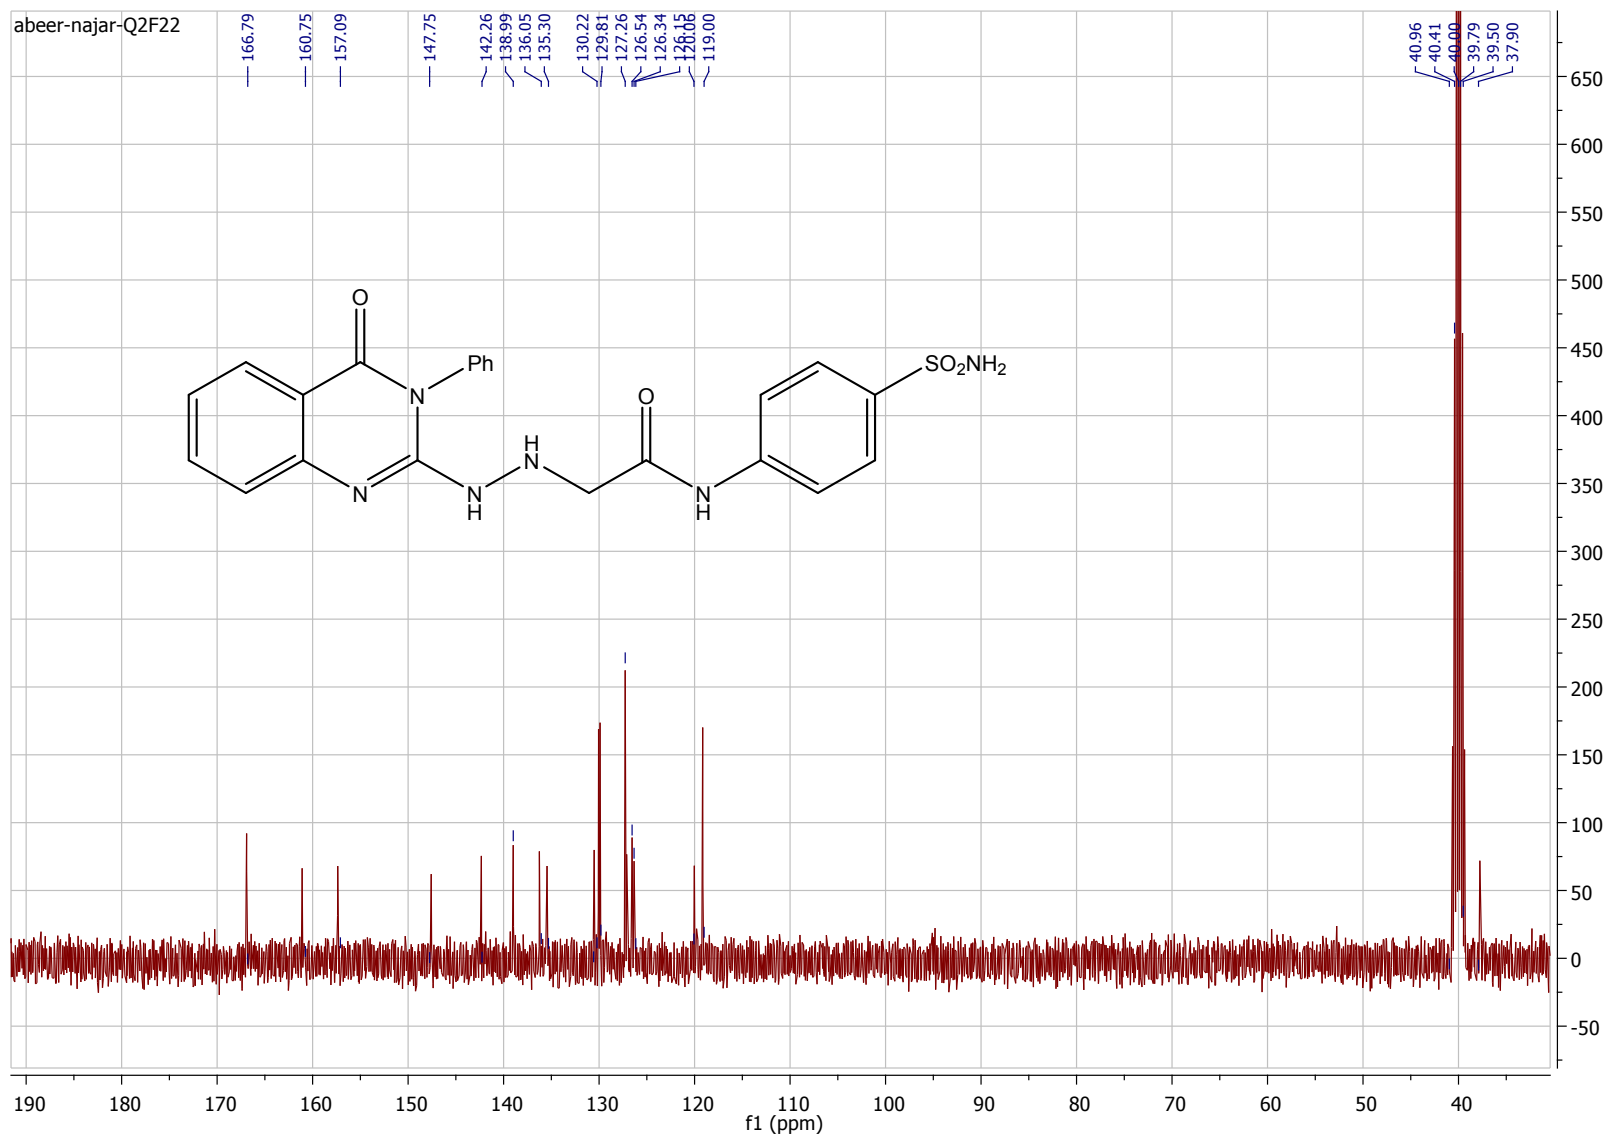

*2-(2-(2-Hydroxybenzylidene)hydrazinyl)-3-phenylquinazolin-4(3H)-one (13a).*

IR

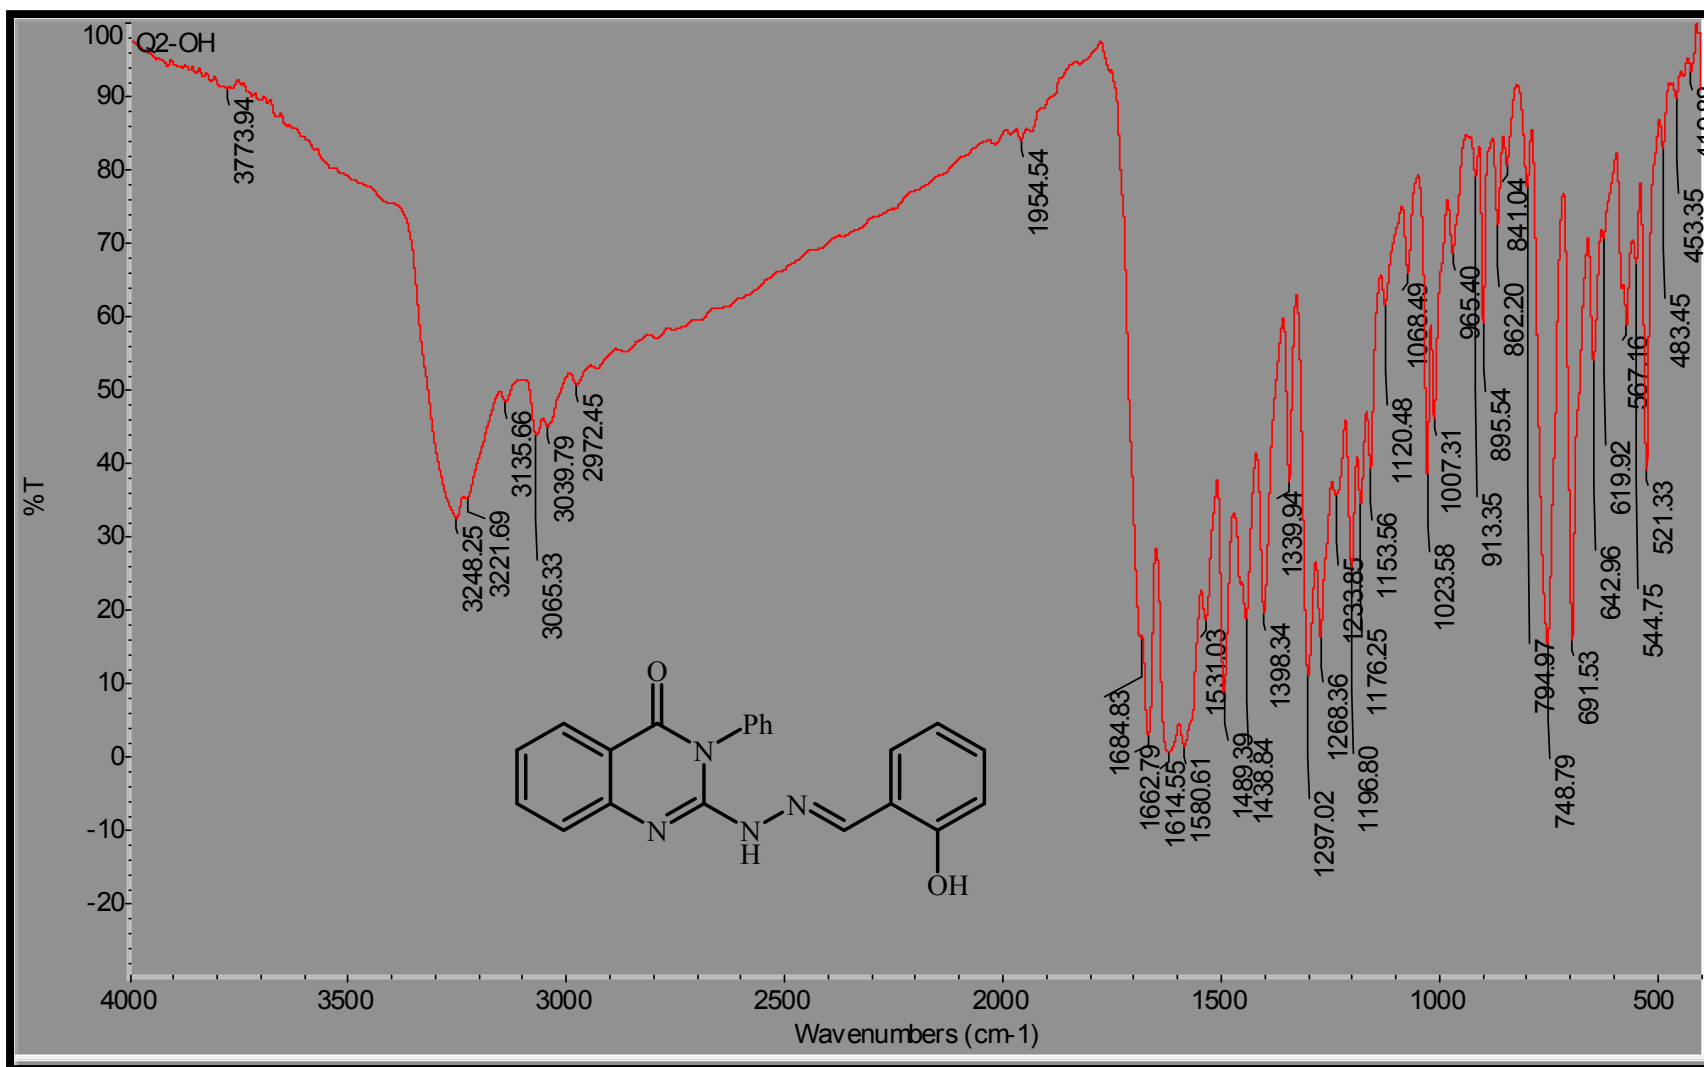

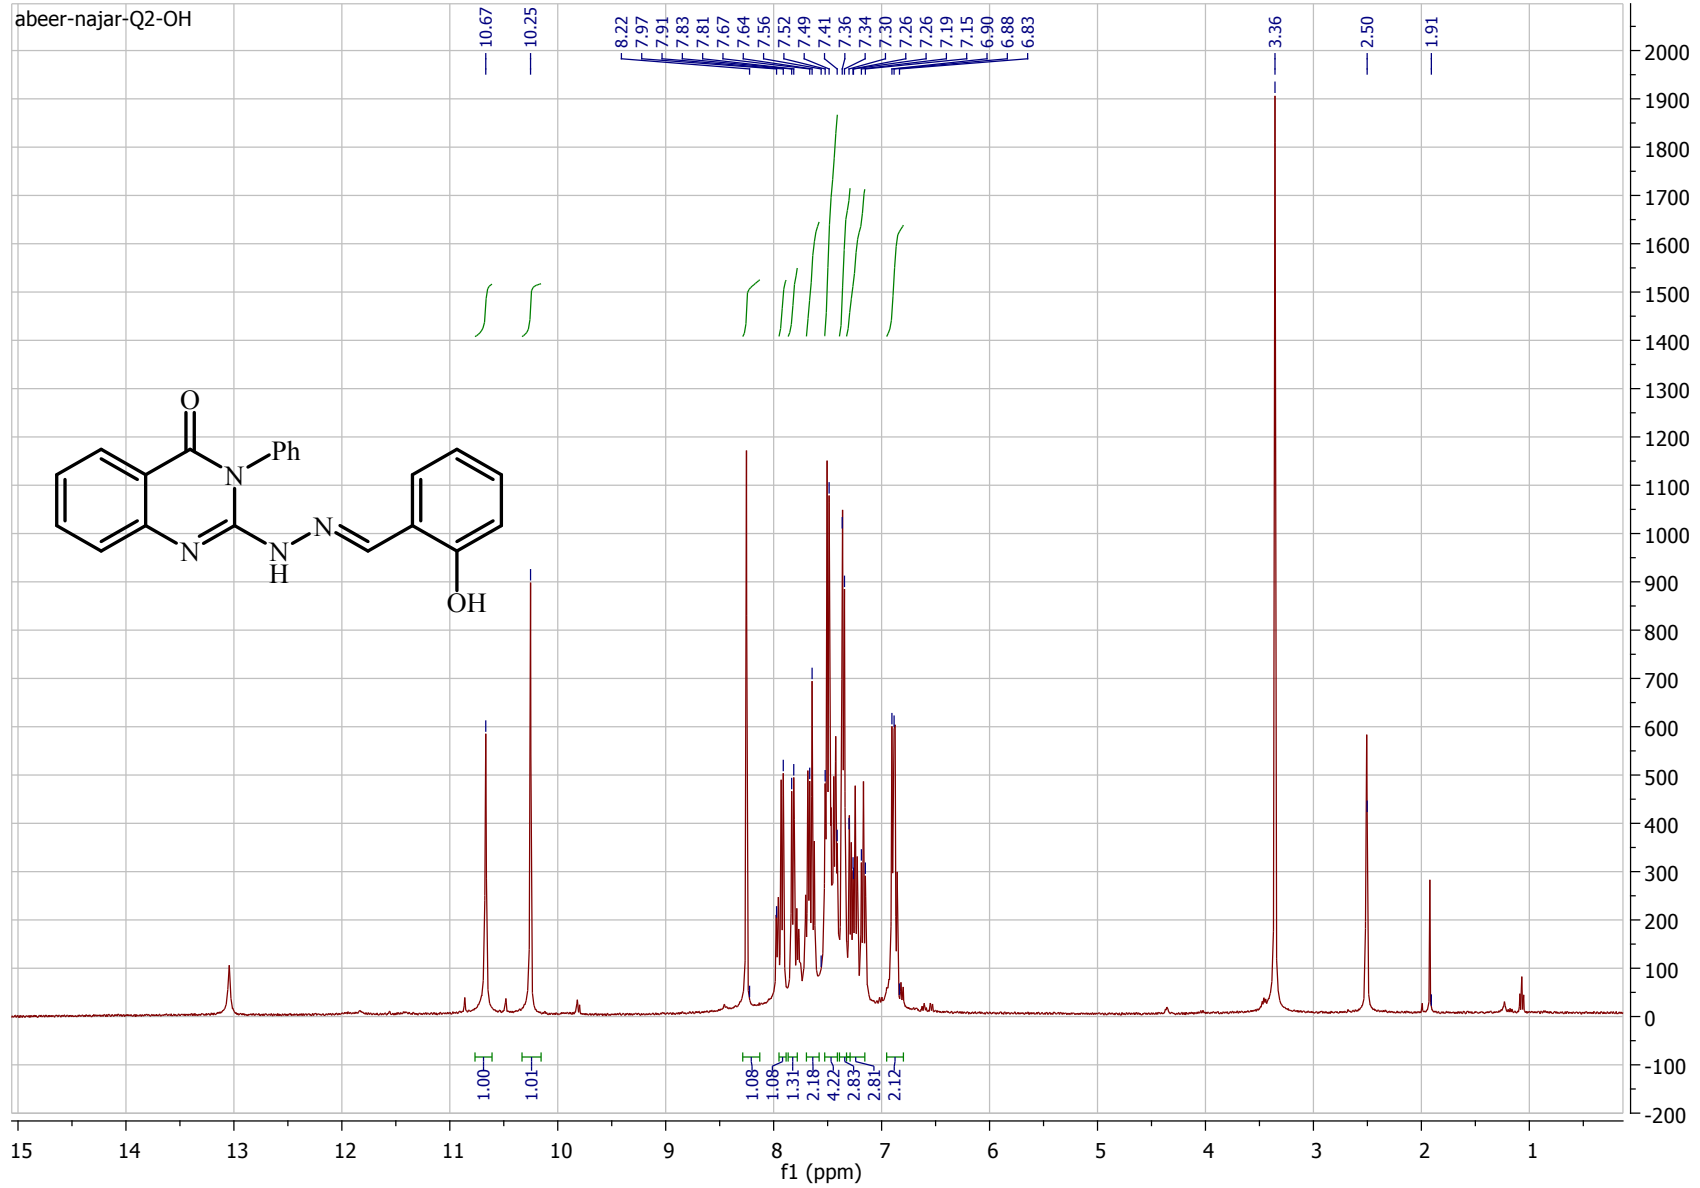

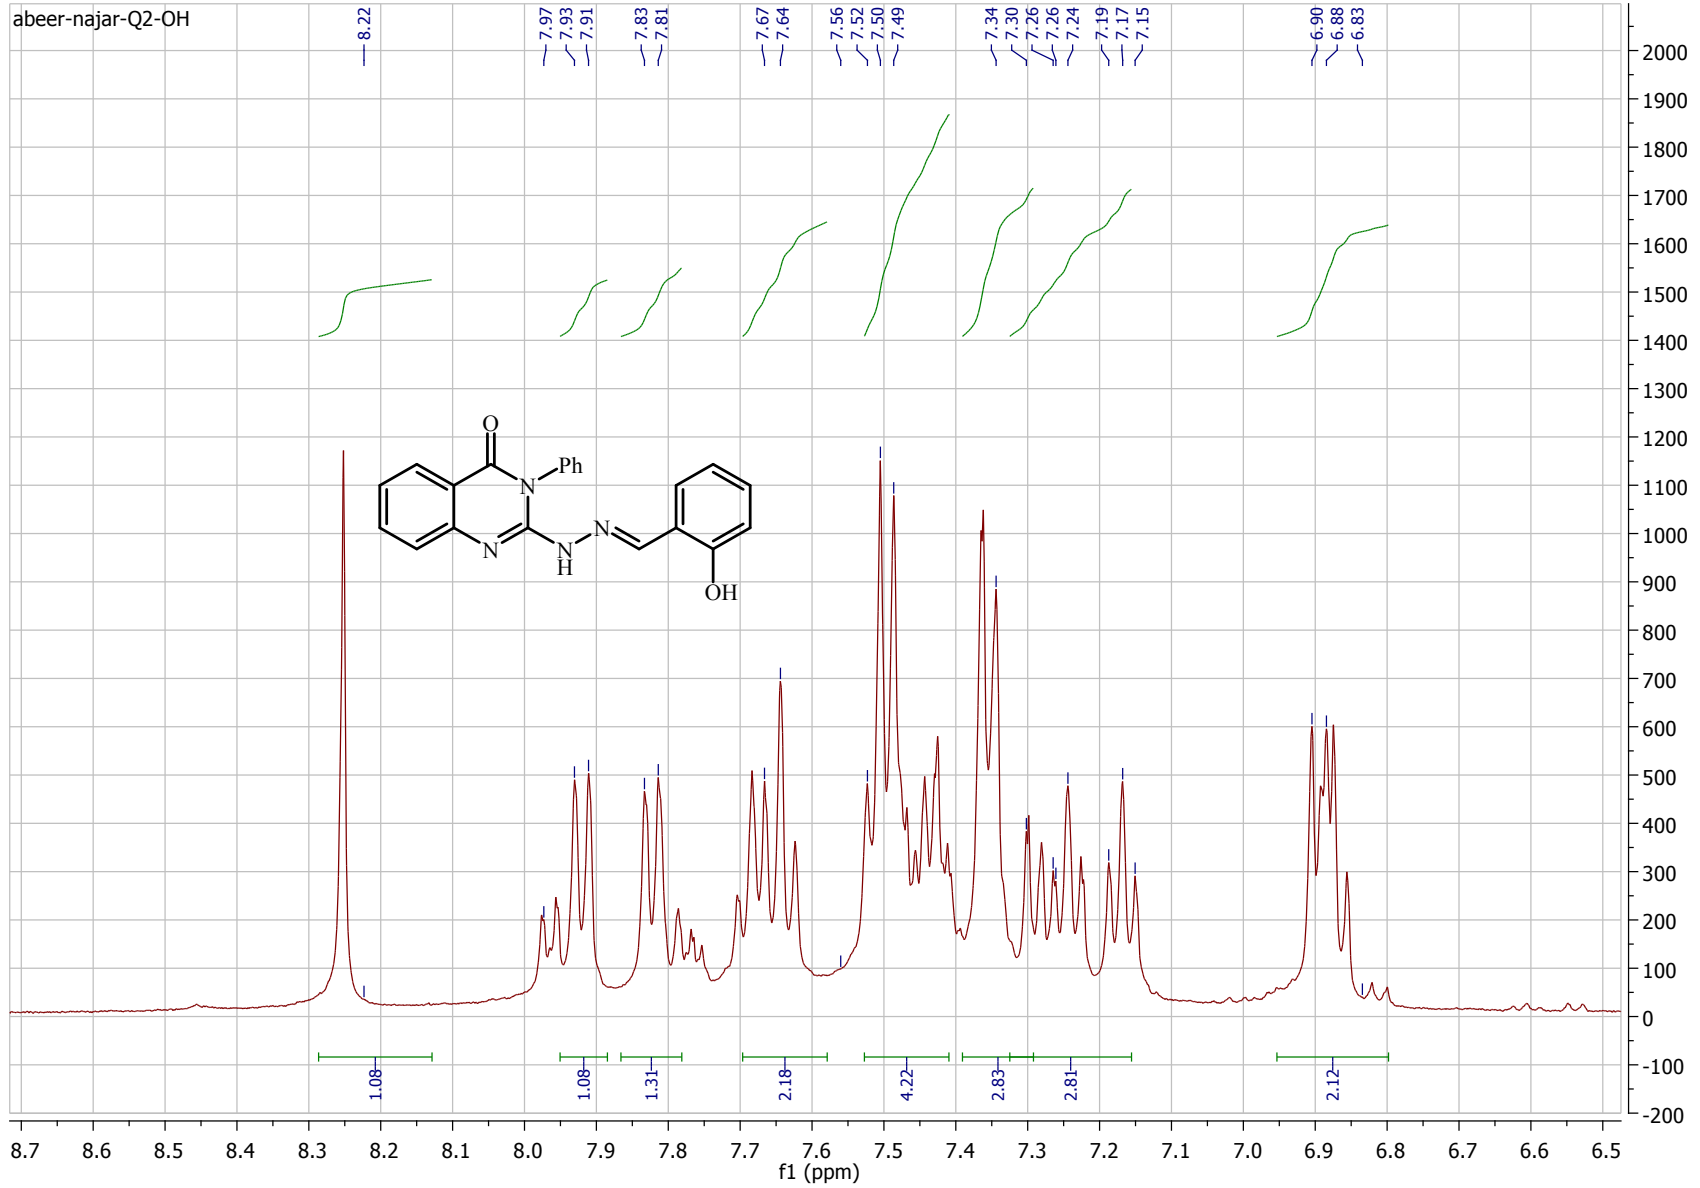

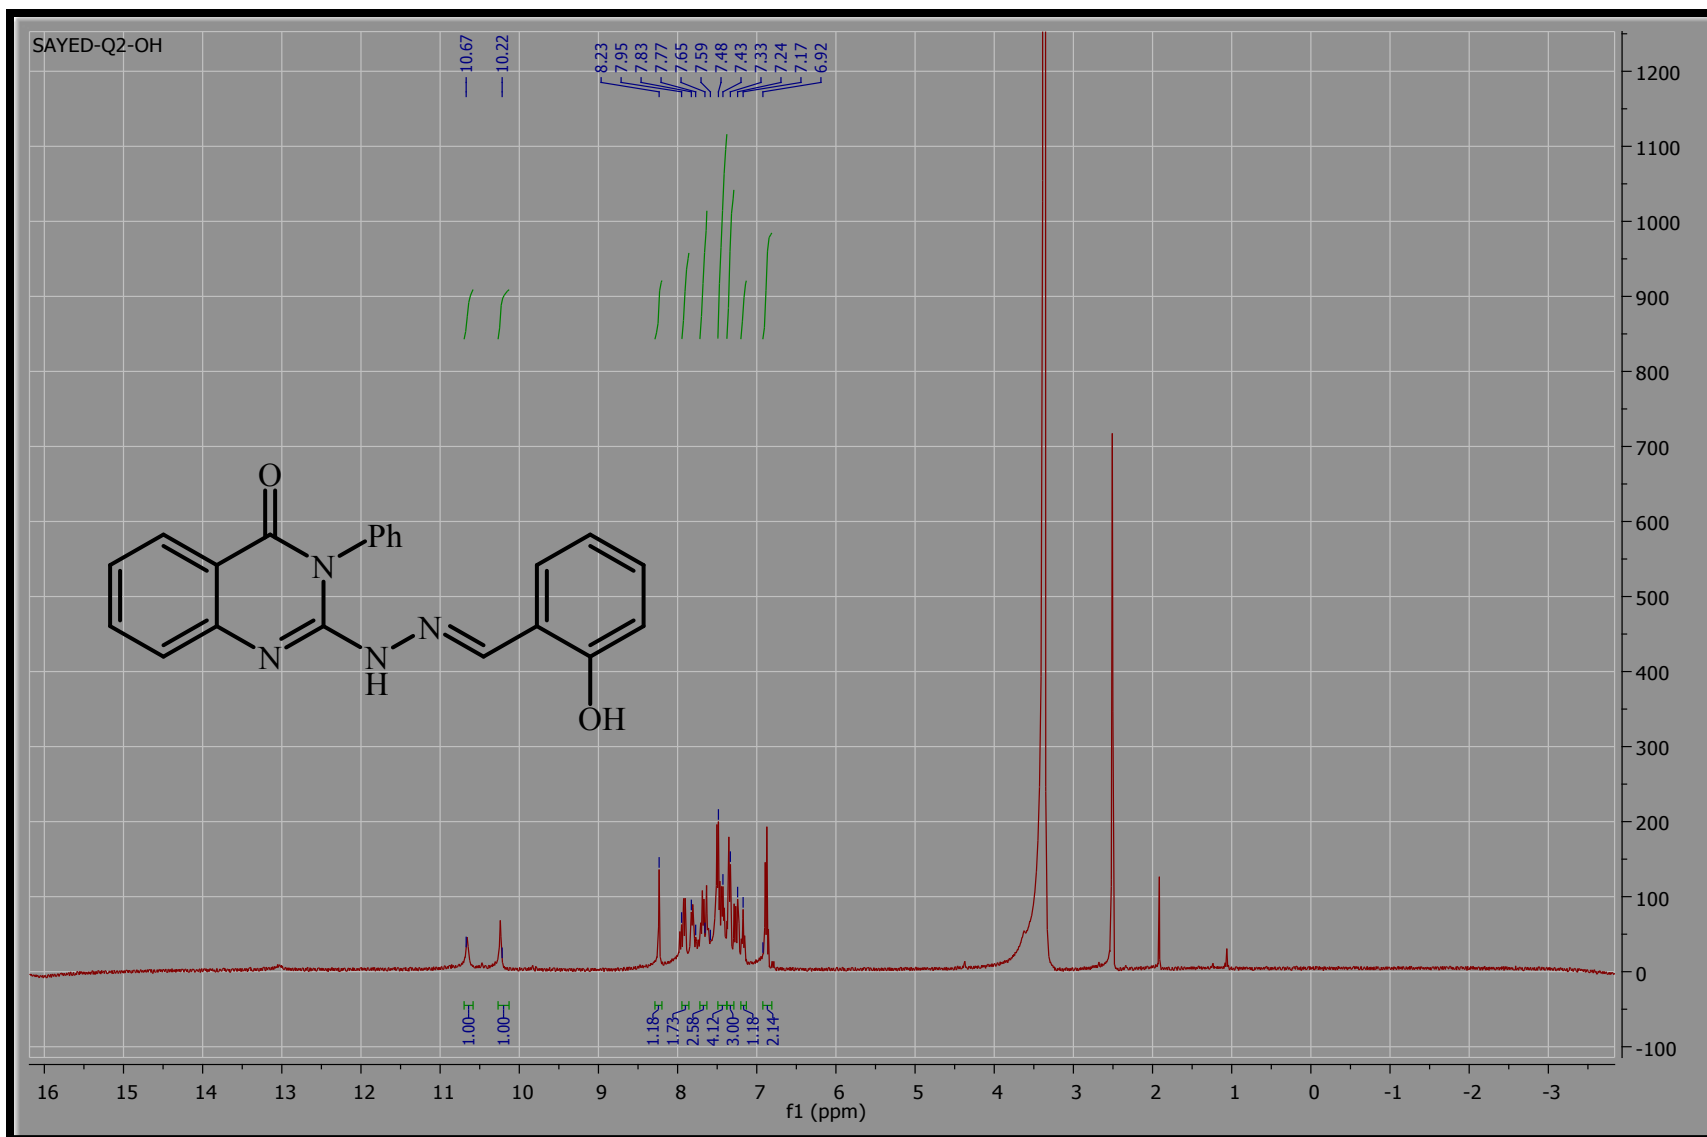



D20

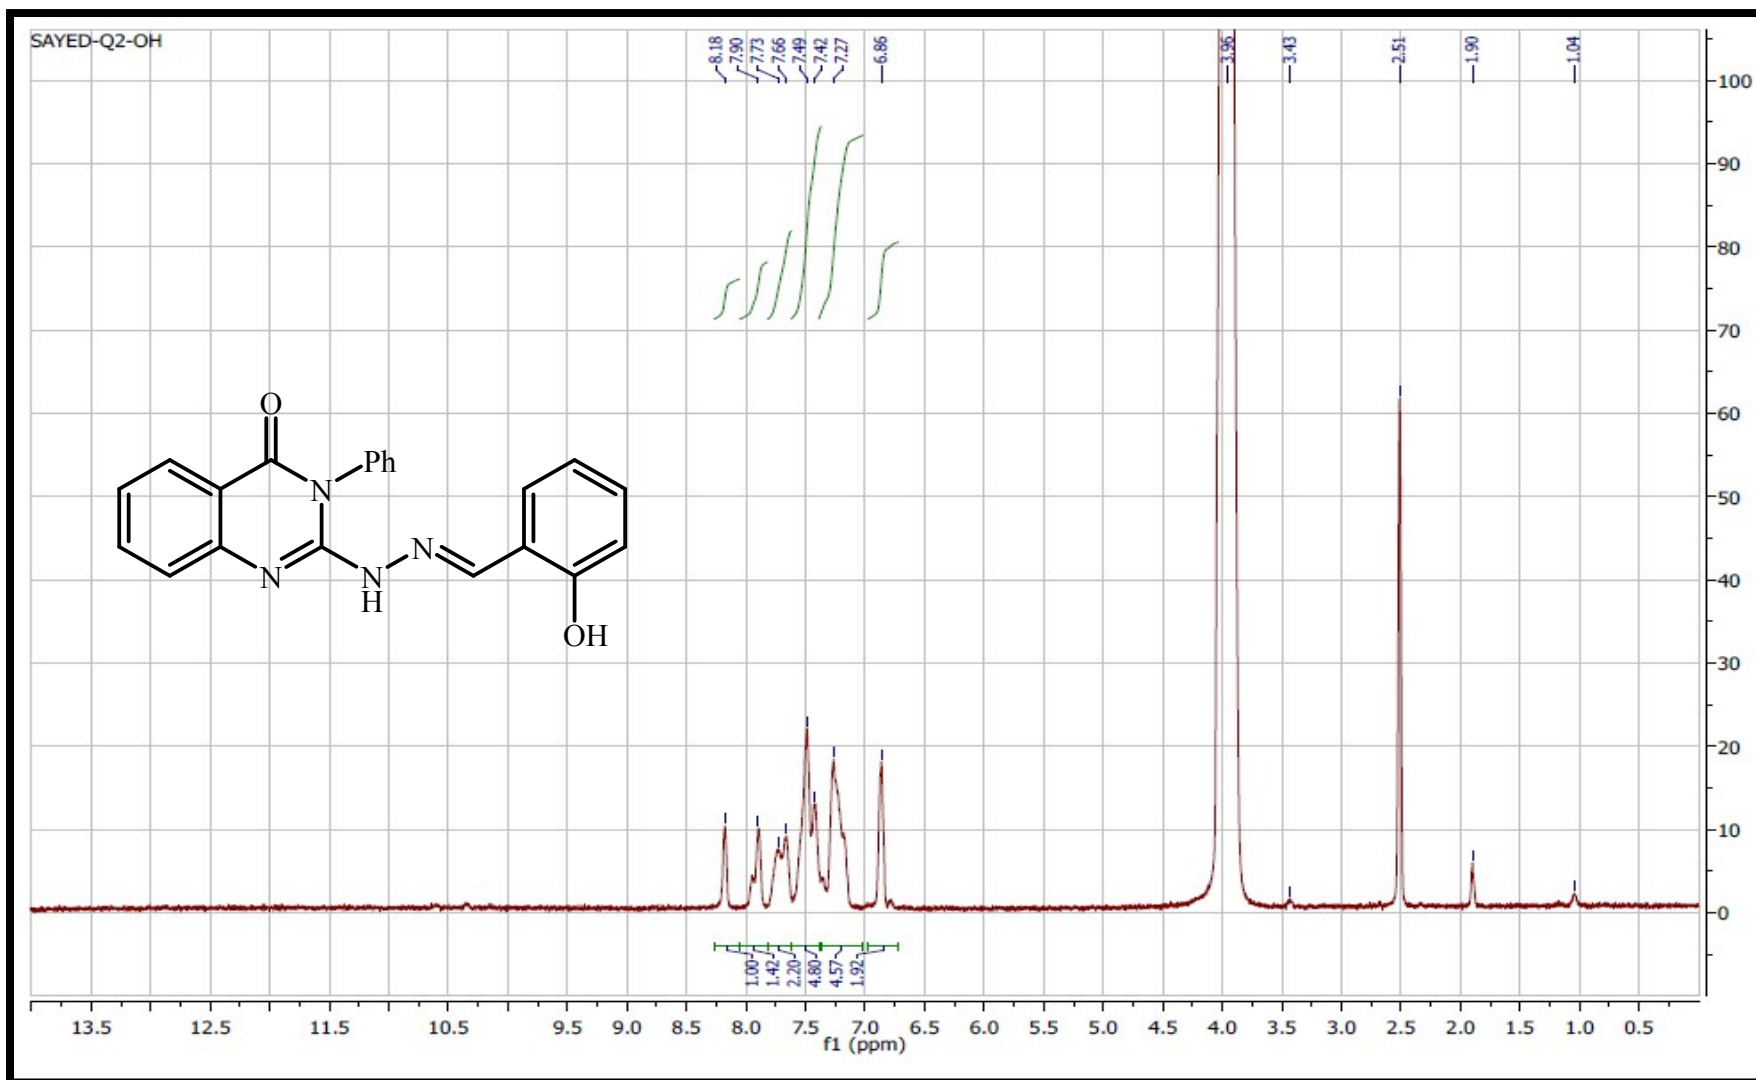

<sup>13</sup>C NMR

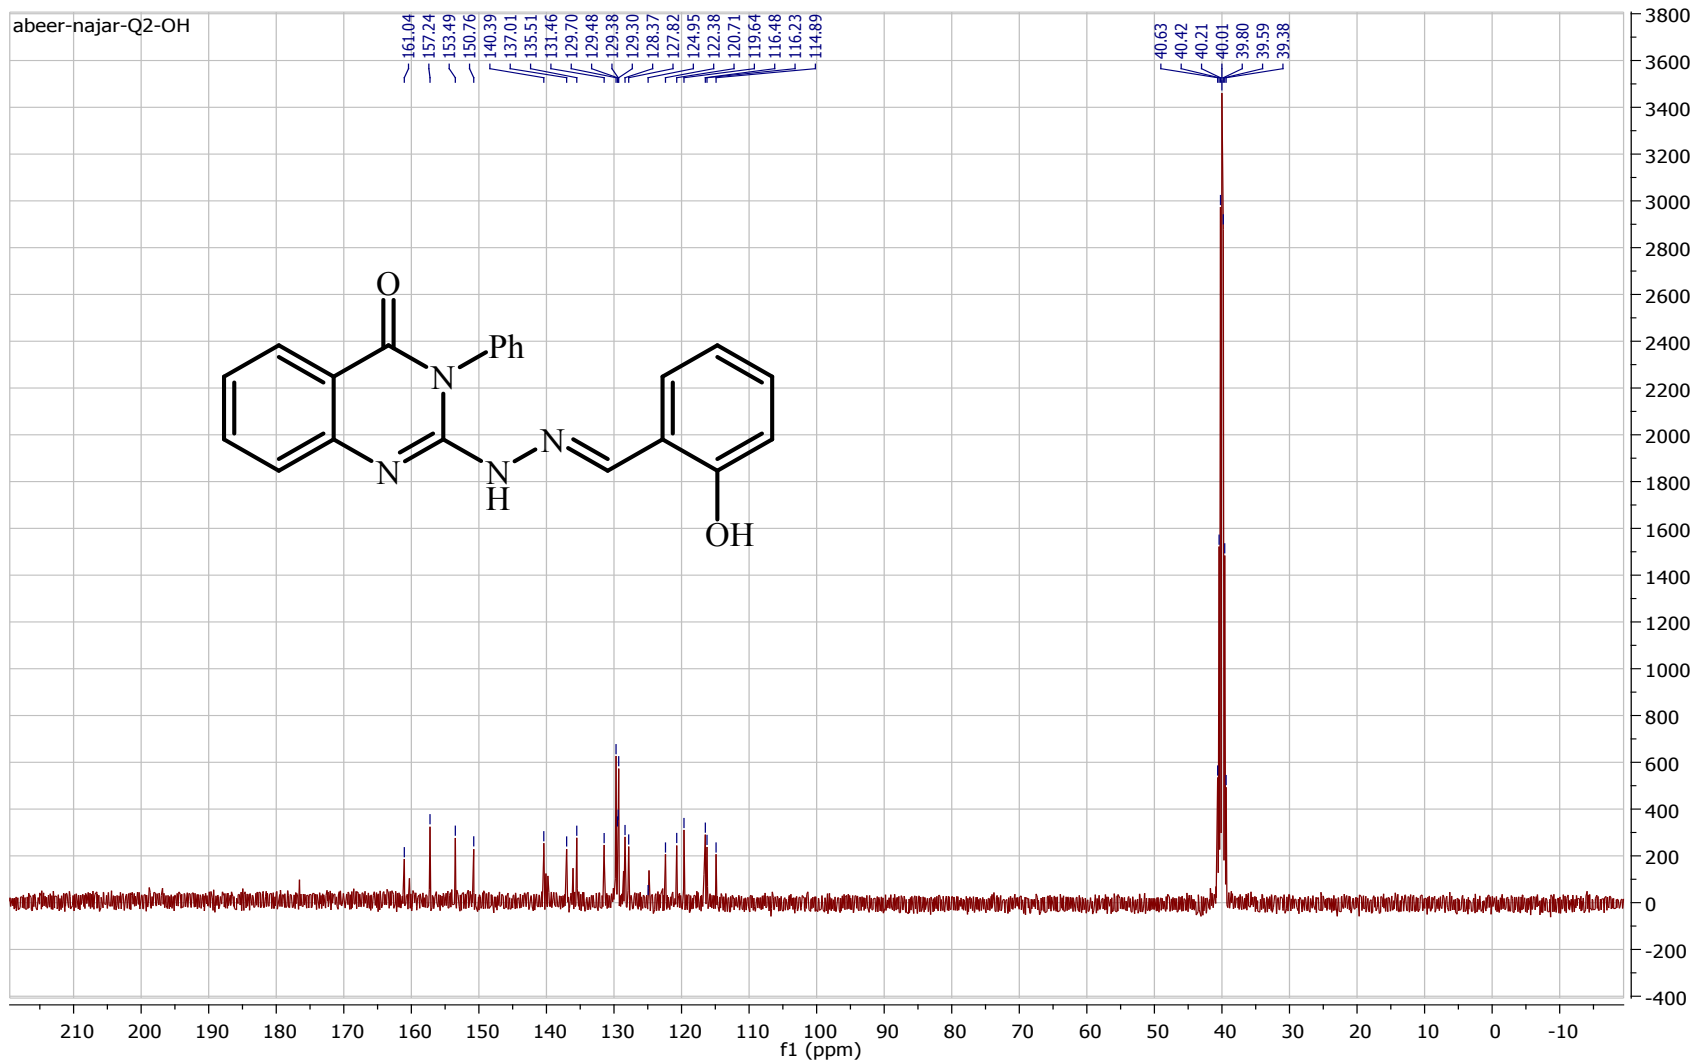

# Mass

sayed-karam-Q2-OH#152 RT: 2.56 AV: 1 SB: 2 2.58 , 2.58 NL: 3.46E4  
T: {0,0} + c EI Full ms [40.00-1000.00]

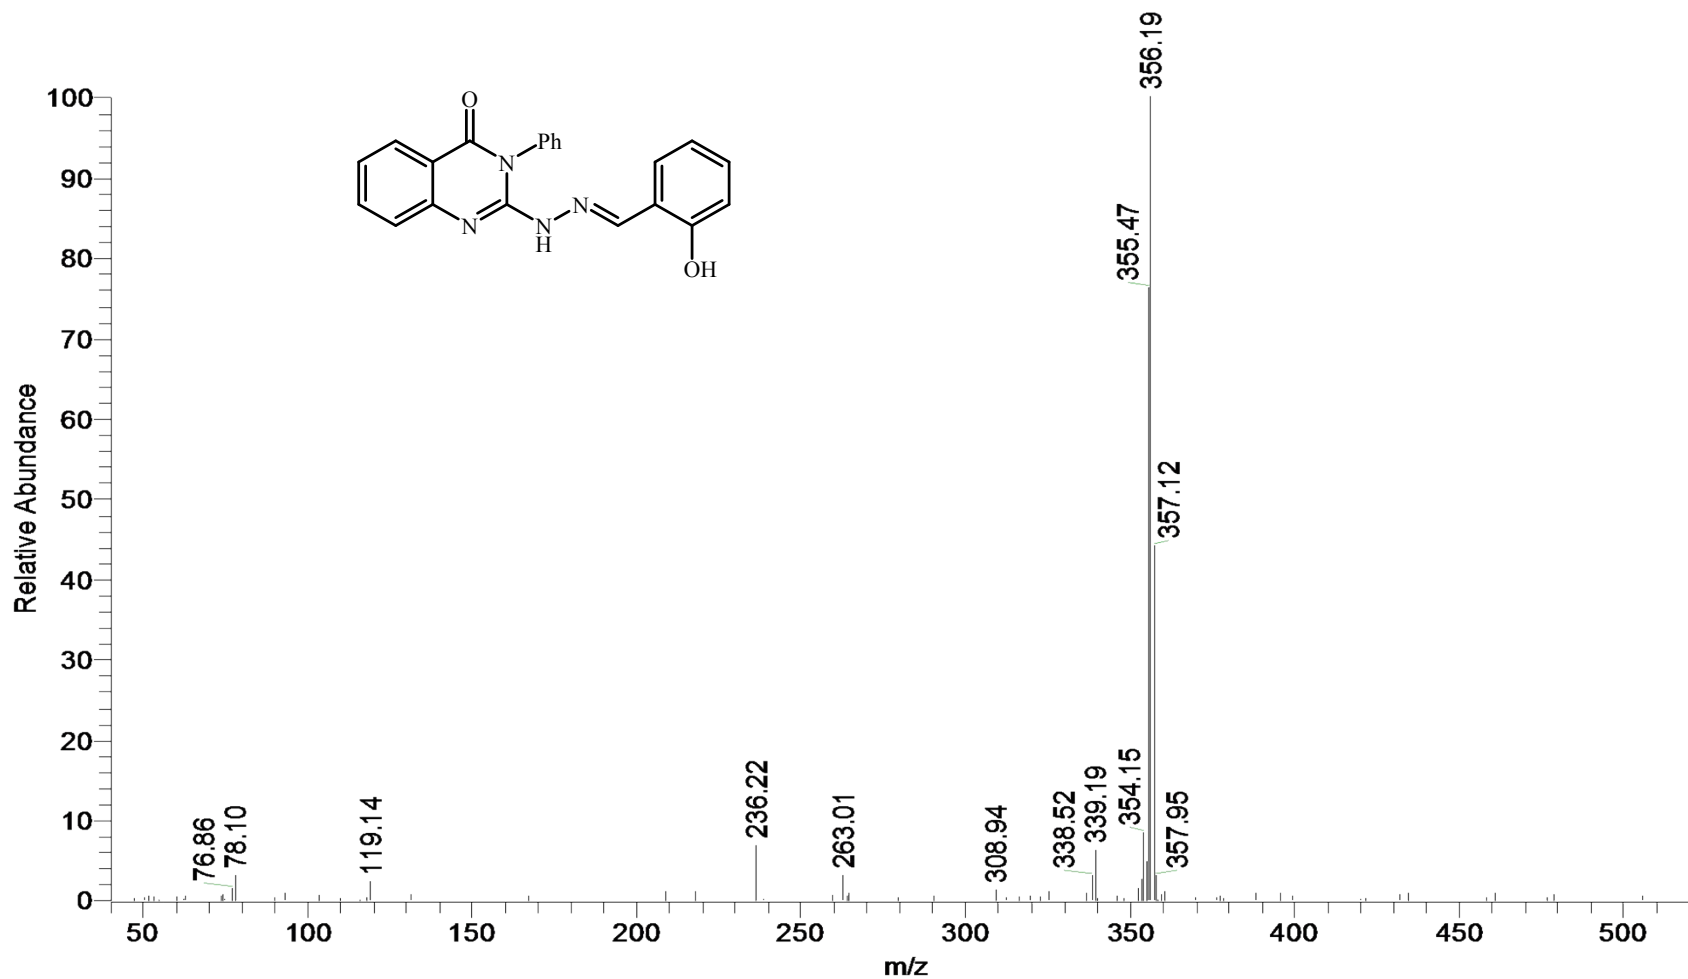

*2-(2-(4-Hydroxybenzylidene)hydrazinyl)-3-phenylquinazolin-4(3H)-one (13b).*

IR

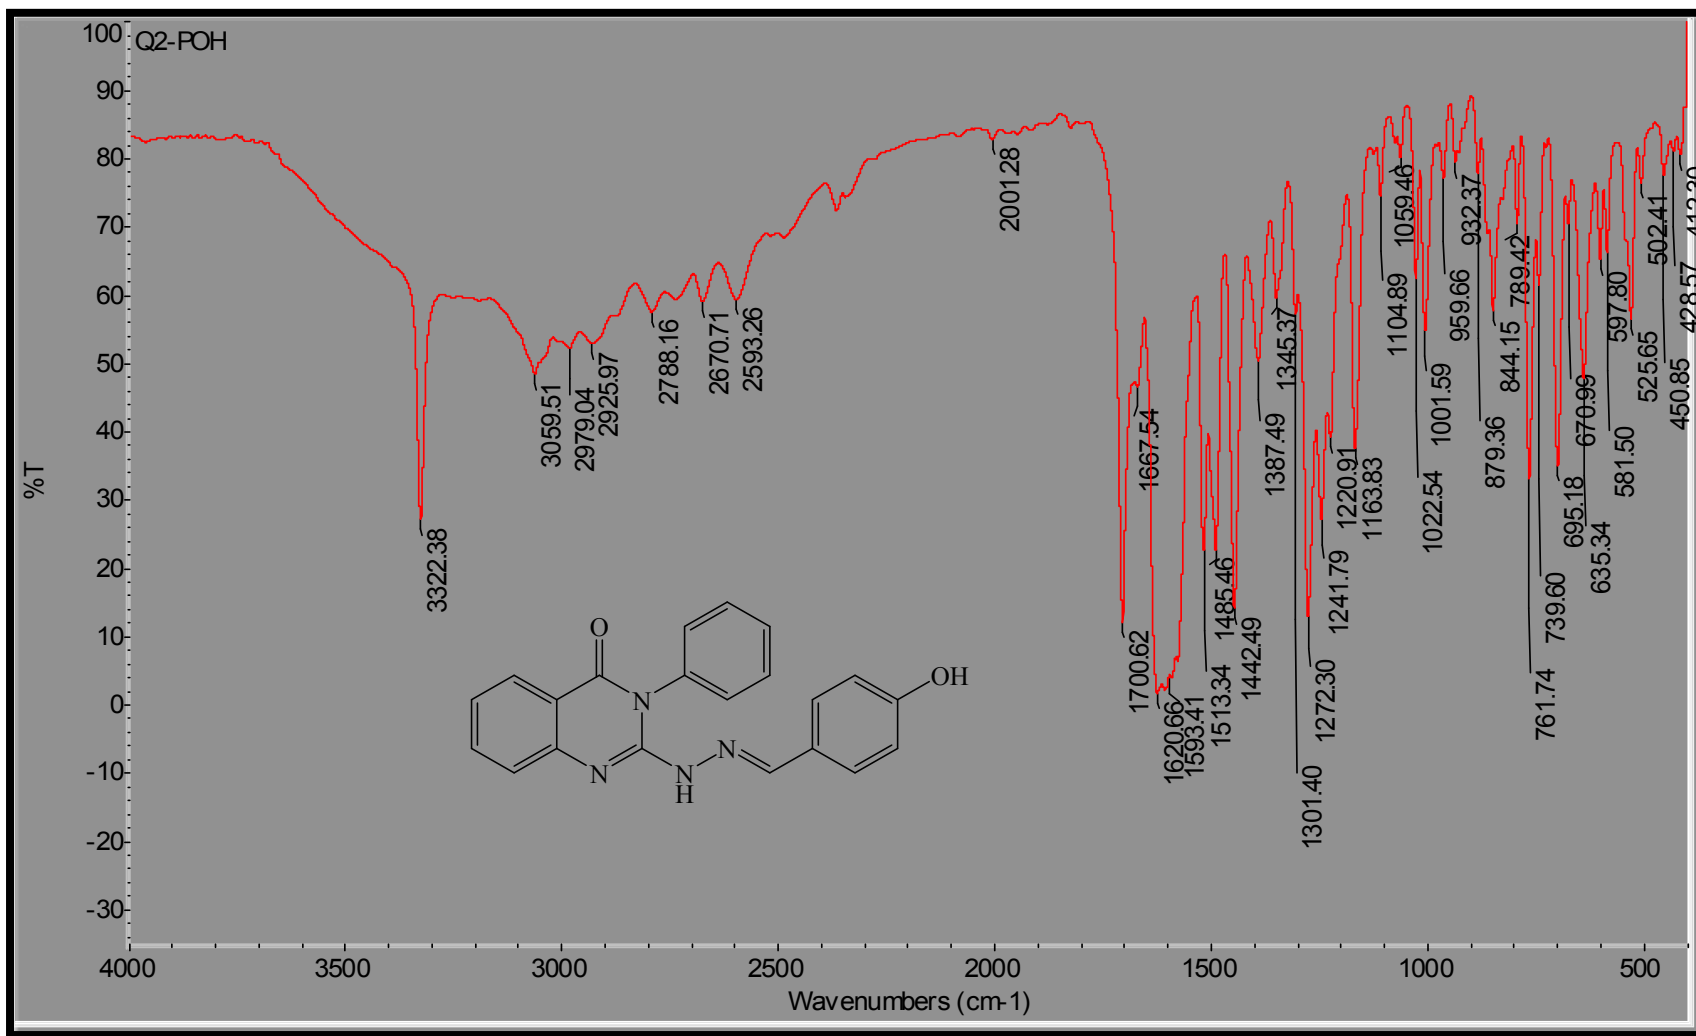

# HNMR

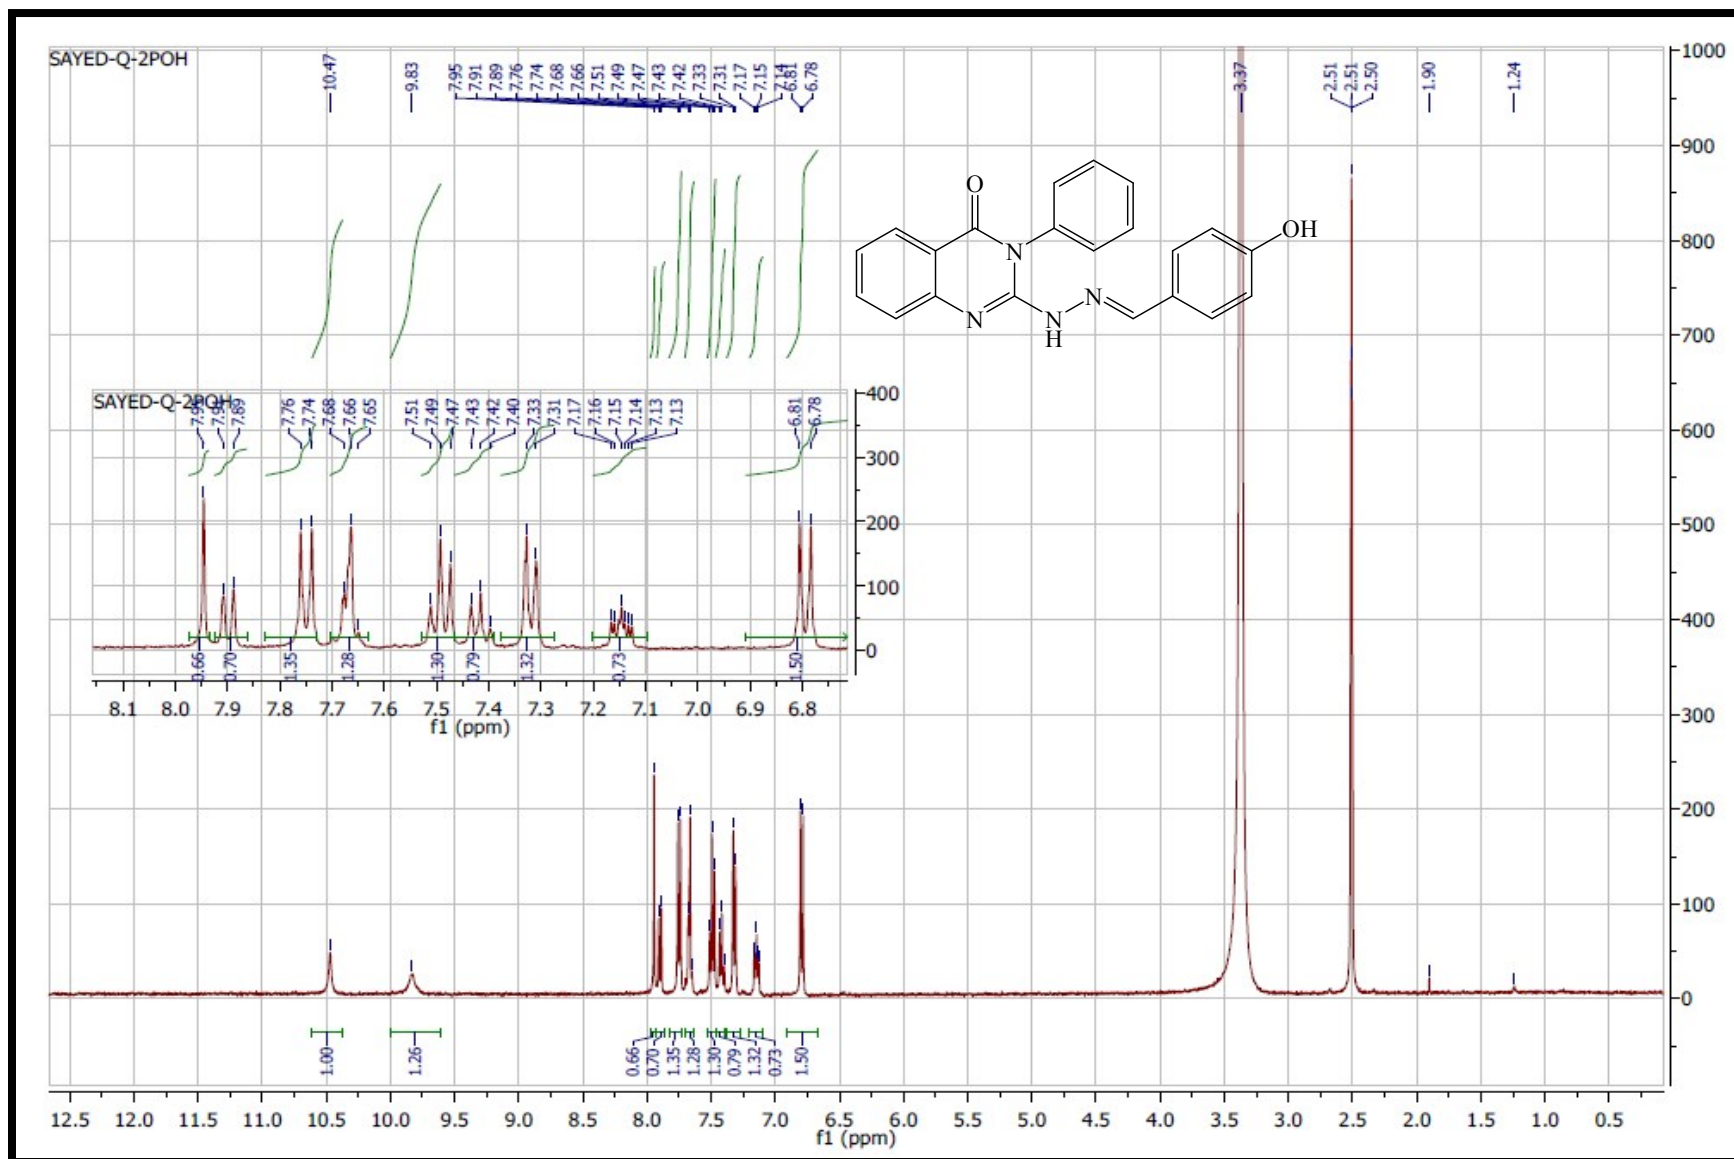

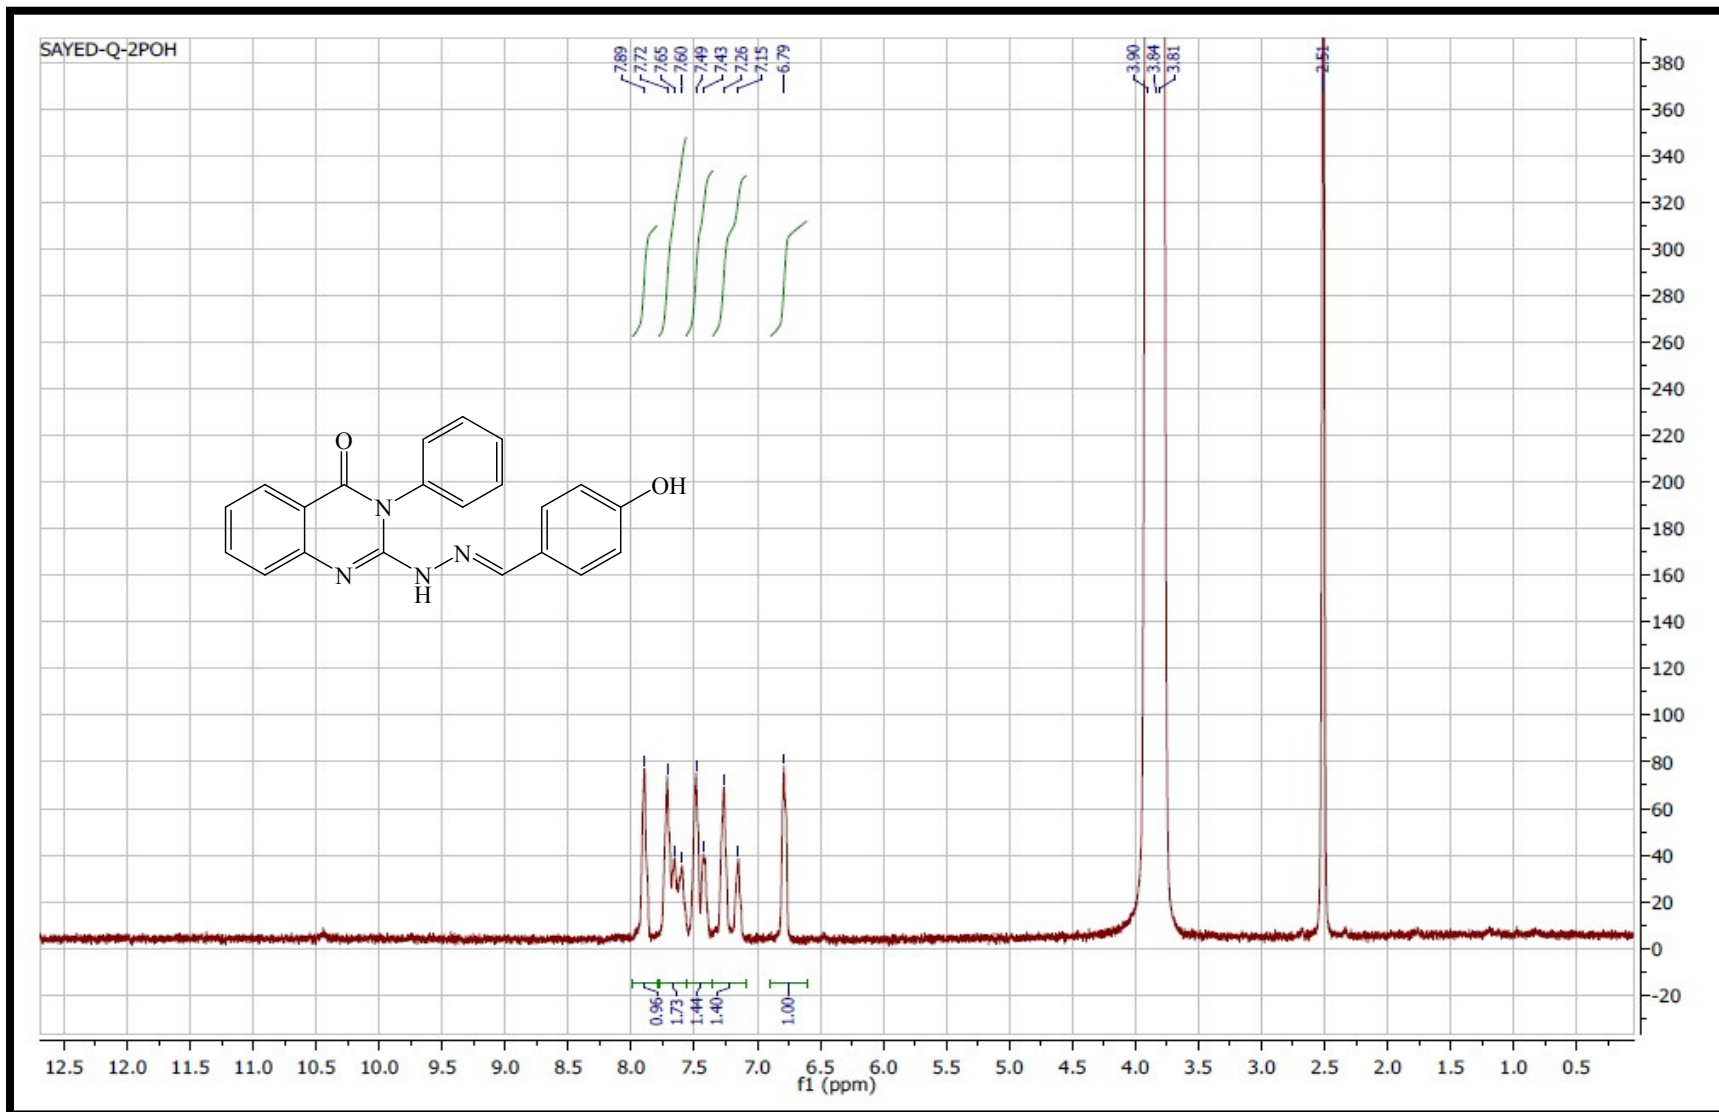

2-(2-(2-Methoxybenzylidene)hydrazinyl)-3-phenylquinazolin-4(3H)-one (13c).

IR

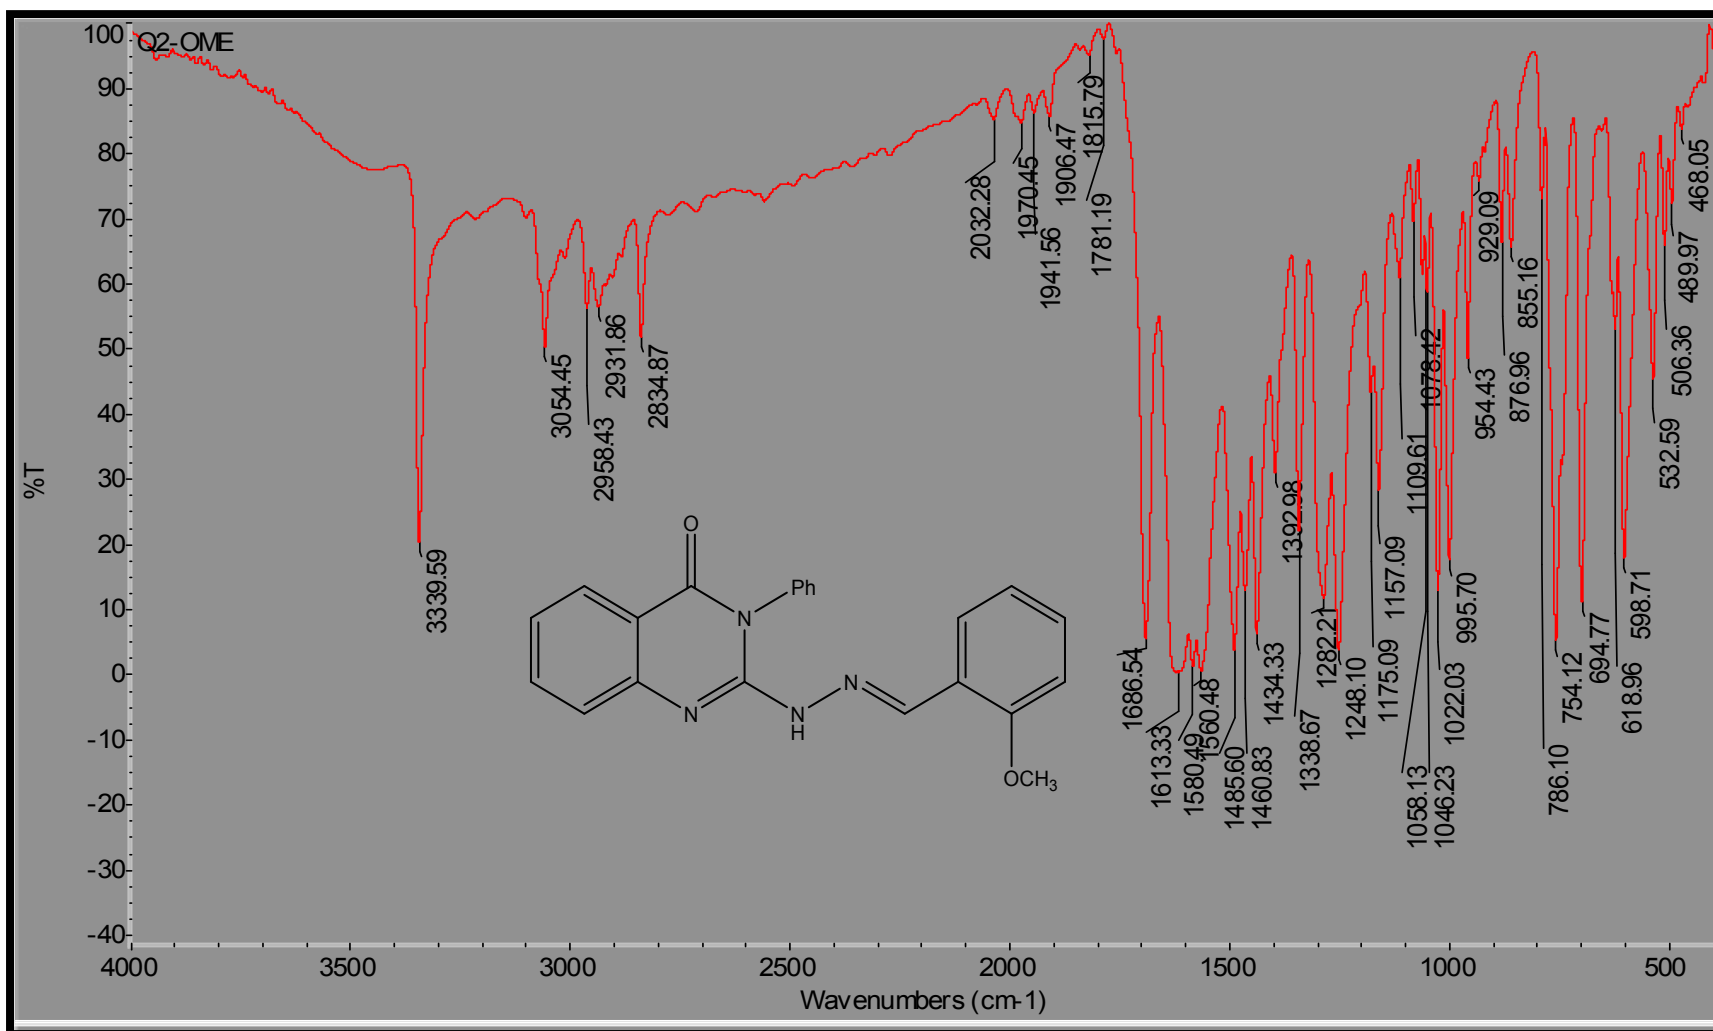

# HNMR

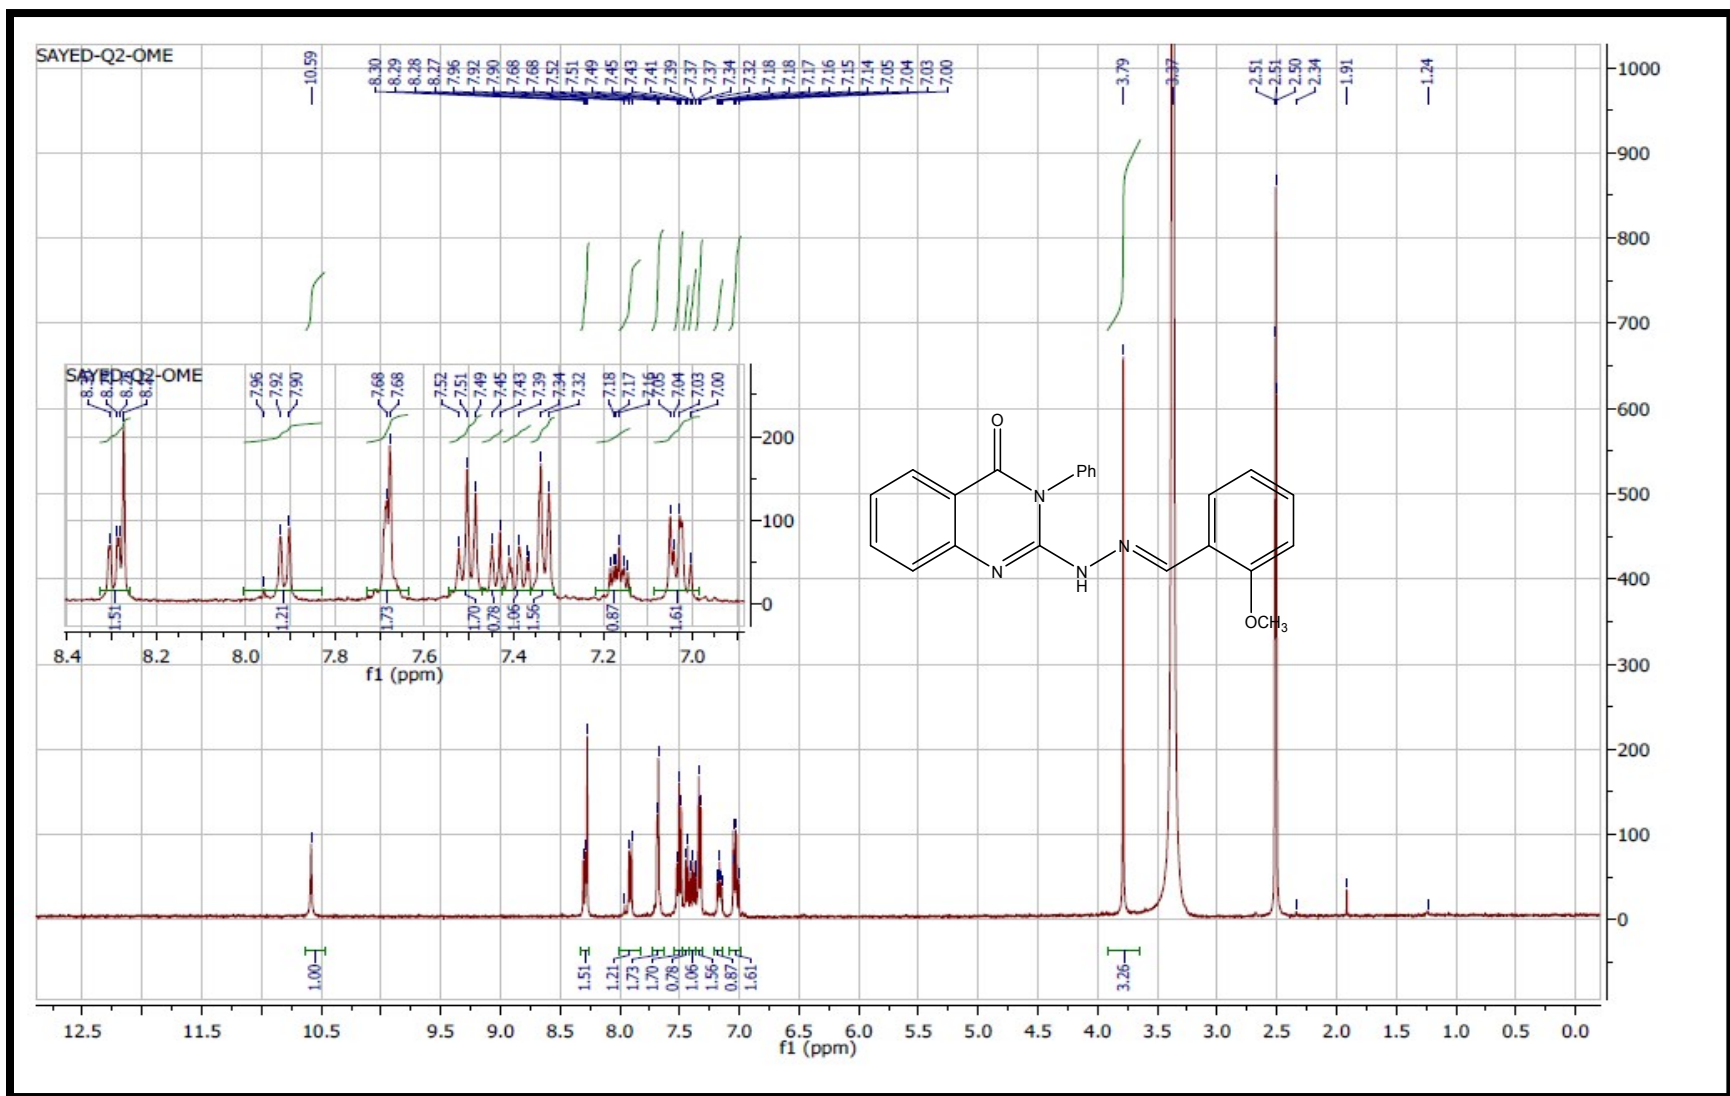



2-(2-(4-Nitrobenzylidene)hydrazinyl)-3-phenylquinazolin-4(3H)-one (13d).

IR

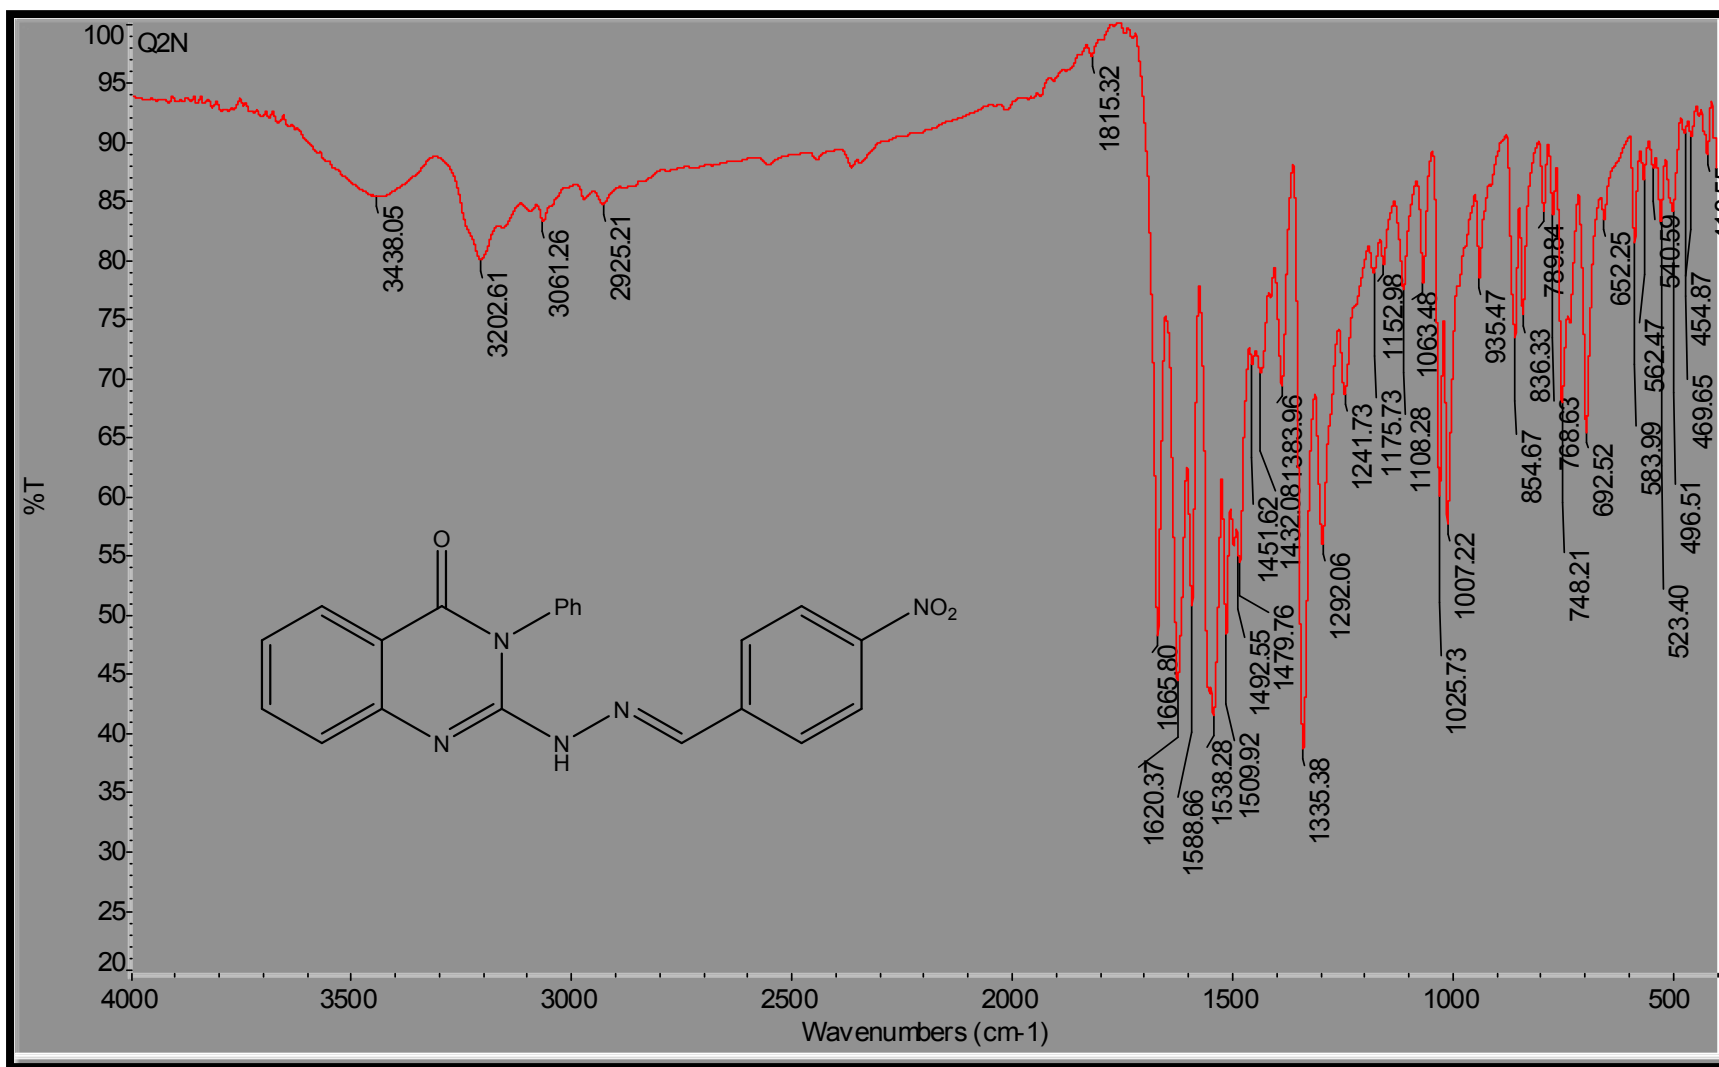

# HNMR

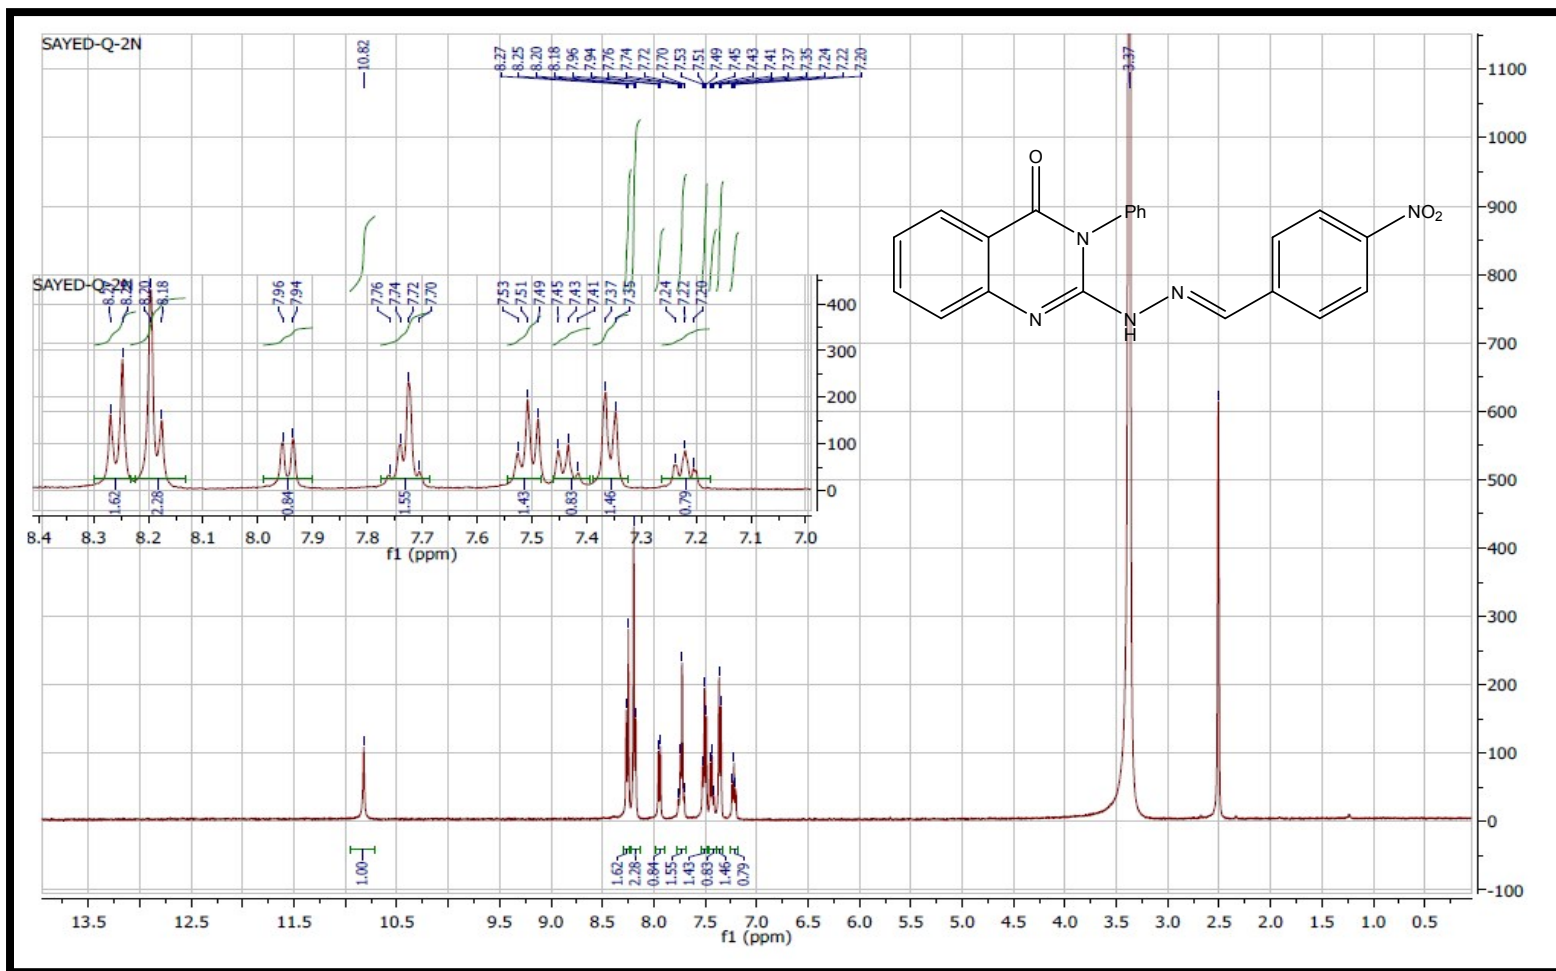

**Table 5.** The docking binding free energies of the synthesized compounds with PARP-1, forming hydrogen bonding and cationic- $\pi$  interactions.

| Compd.    | $\Delta G$ |                                                            |                                     |
|-----------|------------|------------------------------------------------------------|-------------------------------------|
|           | kcal/mol   | No. of hydrogen bonding                                    | No. of cationic- $\pi$ interactions |
| <b>5a</b> | -51.47     | 4 (TYR907, GLY863, TYR896, ARG878)                         | 3 (TYR907, HIS862, LYS903)          |
| <b>5b</b> | -53.18     | 4 (TYR907, HIS862, TYR896, ARG878)                         | 3 (TYR907, HIS862, LYS903)          |
| <b>5c</b> | -51.30     | 6 (TYR907, GLY863, HIS862, TYR896, ARG878, TYR907)         | 3 (TYR907, HIS862, LYS903)          |
| <b>6a</b> | -57.87     | 5 (GLY863, HIS862, TYR896, ARG878, ARG878)                 | 3 (TYR907, HIS862, LYS903)          |
| <b>6b</b> | -55.23     | 5 (TYR907, GLY863, HIS862, TYR896, ARG878)                 | 3 (TYR907, HIS862, LYS903)          |
| <b>7a</b> | -58.20     | 7 (TYR907, GLY863, HIS862, GLY888, ALA880, ARG878, ARG878) | 3 (TYR907, HIS862, ARG878)          |
| <b>7b</b> | -58.43     | 6 (TYR907, GLY863, HIS862, GLY888, ALA880, ARG878, ARG878) | 3 (TYR907, HIS862, ARG878)          |
| <b>8a</b> | -62.52     | 6 (TYR907, GLY863, HIS862, TYR896, ARG878, ASN868)         | 3 (TYR907, HIS862, HIS862)          |
| <b>8b</b> | -57.54     | 5 (TYR907, GLY863, HIS862, TYR896, ARG878)                 | 3 (TYR907, HIS862, HIS862)          |
| <b>8c</b> | -54.18     | 5 (TYR907, GLY863, HIS862, TYR896, ARG878)                 | 3 (TYR907, HIS862, HIS862)          |
| <b>9a</b> | -61.58     | 6 (TYR907, GLY863, HIS862, GLY894, ARG878, ASN868)         | 3 (TYR907, HIS862, LYS903)          |
| <b>9b</b> | -61.10     | 4 (TYR907, GLY863, GLY894, ARG878)                         | 3 (TYR907, HIS862, LYS903)          |

|                 |        |                                                                            |                                    |
|-----------------|--------|----------------------------------------------------------------------------|------------------------------------|
| <b>9c</b>       | -58.25 | 5 (TYR907, GLY863 , HIS862, GLY894, ARG878)                                | 3 (TYR907, HIS862, LYS903)         |
| <b>12a</b>      | -59.61 | 9 (TYR907, SER904, GLY863, HIS862, GLY888, TYR889, TYR896, ARG878, ARG878) | 3 (TYR907, HIS862, LYS903)         |
| <b>12b</b>      | -58.01 | 8 (TYR907, SER904, GLY863, HIS862, GLY888, TYR889, TYR896, ARG878)         | 3 (TYR907, HIS862, LYS903)         |
| <b>12c</b>      | -59.56 | 8 (TYR907, SER904, GLY863, HIS862, GLY888, TYR889, TYR896, ARG878)         | 3 (TYR907, HIS862, LYS903)         |
| <b>13a</b>      | -53.14 | 5 (TYR907, TYR907, GLY863, HIS862, GLY888)                                 | 3 (TYR907, HIS862, LYS903)         |
| <b>13b</b>      | -55.98 | 6 (TYR907, TYR907, GLY863, HIS862 , ALA880, ARG878)                        | 3 (TYR907, HIS862, LYS903)         |
| <b>13c</b>      | -55.01 | 5 (TYR907, TYR907, GLY863, HIS862, TYR896)                                 | 3 (TYR907, HIS862, LYS903)         |
| <b>13d</b>      | -50.56 | 5 (TYR907, TYR907, GLY863, HIS862, TYR889)                                 | 3 (TYR907, HIS862, LYS903)         |
| <b>olaparib</b> | -60.60 | 4 (GLY863, SER904, TYR896, ARG878)                                         | 3 (TYR907, HIS862, LYS903, TYR896) |

---
